# Supplementary material for: Widespread exon skipping triggers degradation by nuclear RNA surveillance in fission yeast
Source: Genome Res. 2015 Jun;25(6):884–96. doi: 10.1101/gr.185371.114 (PMC4448684; doi:10.1101/gr.185371.114)
Supplement: Supplemental Material [file supp_gr.185371.114_Supplemental_Tables.xlsx]

## Sheet: S1
Supplemental Table S1. Fission yeast transcriptomes analysed in this study.
Sample	File_Ref	Total.Mappable.Reads	Junction.Size	Read.Size	LongType	Laboratory	Strain Reference/source	Dartaset accession ENA/SRA/GEO/ArrayExpress	Genotype	Growth conditions	RNA-Seq type	Source of dataset
upf1Δ	sample_5	15336210	96	54	Nonsense Mediated Decay	Bähler	Rodriguez-Gabriel et al., Mol Cell Biol, 2006	PRJEB7403, sample accession:ERS555564	h- upf1::kanMX	YES 32°C	polyA-enriched cDNA	Atkinson et al, unpublished
upf1Δ	sample_6	15204757	96	54	Nonsense Mediated Decay	Bähler	Rodriguez-Gabriel et al., Mol Cell Biol, 2007	PRJEB7403, sample accession:ERS555565	h- upf1::kanMX	YES 32°C	polyA-enriched cDNA	Atkinson et al, unpublished
pab2Δ	sample_7	13349512	96	54	Poly-(A) binding	Bähler	Lemieux et al., Mol Cell, 2011	E-MTAB-708	h+ ade6M216 leu1‐32 ura4D18 his3D1 pab2::kanMX6	YES 30°C	polyA-enriched cDNA	Lemieux et al. Cell,2011
pab2Δ	sample_8	13629803	96	54	Poly-(A) binding	Bähler	Lemieux et al., Mol Cell, 2011	E-MTAB-708	h+ ade6M216 leu1‐32 ura4D18 his3D1 pab2::kanMX7	YES 30°C	polyA-enriched cDNA	Lemieux et al. Cell,2011
spt6-ts	sample_9	16184272	96	54	Transcription compromised	Bähler	DeGennaro et al., Mol Cell Biol, 2013	GSE49575	h- ade6-210 leu1-32 ura4-D18 spt6-1::NatMX	YES 30°C; heat-shocked at 37°C for 2 hours	polyA-enriched cDNA	DeGennaro et al. Mol Cell Biol,2013
spt6-ts	sample_10	15991898	96	54	Transcription compromised	Bähler	DeGennaro et al., Mol Cell Biol, 2013	GSE49575	h- ade6-210 leu1-32 ura4-D18 spt6-1::NatMX	YES 30°C; heat-shocked at 37°C for 2 hours	polyA-enriched cDNA	DeGennaro et al. Mol Cell Biol,2013
rrp6-ts	sample_11	15840654	96	54	Exosome	Bähler	Harigaya et al Nature 2006	PRJEB7403, sample accession:ERS555566	h90 ade6-M216 leu1 rrp6::rrp6.9-GFP kan	YES 32°C; heat-shocked at 36°C for 2.5 hours	polyA-enriched cDNA	Atkinson et al, unpublished
Veg. growth	sample_12	25543348	90	51	Veg. growth	Bähler	Marguerat et al. Cell, 2012	MTAB-1154	h- 972	EMM 32°C	polyA-enriched cDNA	Marguerat et al. Cell, 2012
Veg. growth	sample_13	27591707	90	51	Veg. growth	Bähler	Marguerat et al. Cell, 2012	MTAB-1154	h- 972	EMM 32°C	polyA-enriched cDNA	Marguerat et al. Cell, 2012
Quiescence	sample_14	30437575	90	51	Quiescence	Bähler	Marguerat et al. Cell, 2012	MTAB-1154	h- 972	EMM 32°C; Shifted to minus nitrogen media for 24 hours	polyA-enriched cDNA	Marguerat et al. Cell, 2012
Quiescence	sample_15	28484971	90	51	Quiescence	Bähler	Marguerat et al. Cell, 2012	MTAB-1154	h- 972	EMM 32°C; Shifted to minus nitrogen media for 24 hours	polyA-enriched cDNA	Marguerat et al. Cell, 2012
nmt1-rpb4	sample_16	25903514	90	51	Transcription compromised	Bähler	Sharma et al, Molecular Genetics and Genomic, 2006	PRJEB7379, sample accession:ERS555096	kanMX6-p81nmt1-rpb4 h-	YES 32°C + thiamine for 18 hours	polyA-enriched cDNA	This study
Veg. growth	sample_17	29433627	90	51	Veg. growth	Bähler	Lemieux et al., Mol Cell, 2012	E-MTAB-708	h+ ade6-M216 leu1‐32 ura4- D18 his3‐D1	YES 30°C	polyA-enriched cDNA	Lemieux et al. Cell,2011
HS	sample_18	29050723	90	51	Heat-shock	Bähler	DeGennaro et al., Mol Cell Biol, 2013	GSE49575	h- ade6-210 leu1-32 ura4-D18	YES 30°C; heat-shocked at 37°C for 2 hours	polyA-enriched cDNA	DeGennaro et al. Mol Cell Biol,2013
Veg. growth	sample_19	3527318	88	50	Veg. growth	Bähler	Marguerat et al. Cell, 2012	MTAB-1154	h- 972	EMM 32°C	Total RNA	Marguerat et al. Cell, 2012
Veg. growth	sample_20	3519840	88	50	Veg. growth	Bähler	Marguerat et al. Cell, 2012	MTAB-1154	h- 972	EMM 32°C	Total RNA	Marguerat et al. Cell, 2012
Veg. growth	sample_21	3833930	88	50	Veg. growth	Bähler	Marguerat et al. Cell, 2012	MTAB-1154	h- 972	EMM 32°C	Total RNA	Marguerat et al. Cell, 2012
Veg. growth	sample_22	4104144	88	50	Veg. growth	Bähler	Marguerat et al. Cell, 2012	MTAB-1154	h- 972	EMM 32°C	Total RNA	Marguerat et al. Cell, 2012
Quiescence	sample_23	4908824	88	50	Quiescence	Bähler	Marguerat et al. Cell, 2012	MTAB-1154	h- 972	EMM 32°C; Shifted to minus nitrogen media for 24 hours	Total RNA	Marguerat et al. Cell, 2012
Quiescence	sample_24	5006449	88	50	Quiescence	Bähler	Marguerat et al. Cell, 2012	MTAB-1154	h- 972	EMM 32°C; Shifted to minus nitrogen media for 24 hours	Total RNA	Marguerat et al. Cell, 2012
Quiescence	sample_25	4478791	88	50	Quiescence	Bähler	Marguerat et al. Cell, 2012	MTAB-1154	h- 972	EMM 32°C; Shifted to minus nitrogen media for 24 hours	Total RNA	Marguerat et al. Cell, 2012
Quiescence	sample_26	4506163	88	50	Quiescence	Bähler	Marguerat et al. Cell, 2012	MTAB-1154	h- 972	EMM 32°C	Total RNA	Marguerat et al. Cell, 2012
Veg. growth	sample_27	8715071	140	76	Veg. growth	Bähler	Atkinson et al, unpublished	PRJEB7403, sample accession:ERS555567	h- 972	YES 32°C	polyA-enriched cDNA	Atkinson et al, unpublished
rrp6-ts	sample_28	9962794	140	76	Exosome	Bähler	Harigaya et al Nature 2006	PRJEB7403, sample accession:ERS555568	h90 ade6-M216 leu1 rrp6::rrp6.9-GFP kan	YES 32°C; heat-shocked at 36°C for 2.5 hours	polyA-enriched cDNA	Atkinson et al, unpublished
exo2Δ	sample_29	12775672	140	76	Cytoplasmic exonuclease	Bähler	Atkinson et al, unpublished	PRJEB7403, sample accession:ERS555569	h- exo2::kanMX6 ade6-216	YES 32°C	polyA-enriched cDNA	Atkinson et al, unpublished
Stationary	sample_30	14850322	140	76	Stationary phase	Bähler	Atkinson et al, unpublished	PRJEB7403, sample accession:ERS555570	h- 972	EMM 32°C; Harvested as soon as reached stationary phase	polyA-enriched cDNA	Atkinson et al, unpublished
Stationary	sample_31	11474115	140	76	Stationary phase	Bähler	Atkinson et al, unpublished	PRJEB7403, sample accession:ERS555571	h- 972	EMM 32°C; Harvested deep in stationary phase when viability dropped to 50% (assesed by CFU)	polyA-enriched cDNA	Atkinson et al, unpublished
Quiescence	sample_32	11363482	140	76	Quiescence	Bähler	Schlackow et al, RNA, 2013	E-MTAB-1824	h- 972	EMM 32°C; Shifted to minus nitrogen media for 7 days	polyA-enriched cDNA	Schlackow et al, RNA, 2013
HS	sample_33	11628689	140	76	Heat-shock	Bähler	DeGennaro et al., Mol Cell Biol, 2013	GSE49575	h- ade6-210 leu1-32 ura4-D18	YES 30°C; heat-shocked at 37°C for 2 hours	polyA-enriched cDNA	DeGennaro et al. Mol Cell Biol,2013
spt6-ts	sample_34	11004514	140	76	Transcription compromised	Bähler	DeGennaro et al., Mol Cell Biol, 2013	GSE49575	h- ade6-210 leu1-32 ura4-D18 spt6-1::NatMX	YES 30°C; heat-shocked at 37°C for 2 hours	polyA-enriched cDNA	DeGennaro et al. Mol Cell Biol,2013
HS	sample_68	24996140	124	68	Heat-shock	Rhind	Rhind et al. Science 2011	SRP005611	h+ 975	As described in Rhind et al. Science 2011	polyA-enriched cDNA,Paired-end	Rhind et al. Science 2011
Veg. growth	sample_69	26170695	124	68	Veg. growth	Rhind	Rhind et al. Science 2011	SRP005611	h+ 975	As described in Rhind et al. Science 2011	polyA-enriched cDNA,Paired-end	Rhind et al. Science 2011
Glu	sample_70	30369516	124	68	Glucose depletion	Rhind	Rhind et al. Science 2011	SRP005611	h+ 975	As described in Rhind et al. Science 2011	polyA-enriched cDNA,Paired-end	Rhind et al. Science 2011
Stationary	sample_71	32386028	124	68	Stationary phase	Rhind	Rhind et al. Science 2011	SRP005611	h+ 975	As described in Rhind et al. Science 2011	polyA-enriched cDNA,Paired-end	Rhind et al. Science 2011
Veg. growth	sample_72	43926216	90	51	Veg. growth	Bähler	Lemay et al, NSMB, 2014	E-MTAB-2237	h+ ade6-M216 leu1-32 ura4-D18 his3D1	YES 32°C	polyA-enriched cDNA	Lemay et al, NSMB, 2014
Veg. growth	sample_73	46185224	90	51	Veg. growth	Bähler	Lemay et al, NSMB, 2014	E-MTAB-2237	h+ ade6-M216 leu1-32 ura4-D18 his3D1	EMM 32°C Plus 60uM thiamine for 15hours	polyA-enriched cDNA	Lemay et al, NSMB, 2014
dis3_54-ts	sample_74	43394224	90	51	Exosome	Bähler	Wang et al MCB 2008	PRJEB7403, sample accession:ERS555572	h+ leu1 ura4 his2 dis3-54	YES 30°C; cold-sensitive	polyA-enriched cDNA	Atkinson et al, unpublished
dis3_54-ts	sample_75	37218898	90	51	Exosome	Bähler	Wang et al MCB 2008	PRJEB7403, sample accession:ERS555573	h+ leu1 ura4 his2 dis3-54	YES 30°C; cold-sensitive	polyA-enriched cDNA	Atkinson et al, unpublished
nmt1-dis3	sample_76	48949023	90	51	Exosome	Bähler	Lemay et al, NSMB, 2014	E-MTAB-2237	h+ ade6-M216 leu1‐32 ura4‐D18 his3‐D1 p81nmt1‐ kanMX6::dis3	EMM 32°C Plus 60uM thiamine for 15hours	polyA-enriched cDNA	Lemay et al, NSMB, 2014
nmt1-dis3	sample_77	37631054	90	51	Exosome	Bähler	Lemay et al, NSMB, 2014	E-MTAB-2237	h+ ade6-M216 leu1‐32 ura4‐D18 his3‐D1 p81nmt1‐ kanMX6::dis3	EMM 32°C Plus 60uM thiamine for 15hours	polyA-enriched cDNA	Lemay et al, NSMB, 2014
nmt1-mtr4	sample_80	35948188	90	51	TRAMP	Bähler	Lemay et al, NSMB, 2014	E-MTAB-2237	h+ ade6-M216 leu1‐32 ura4‐D18 his3‐D1 p81nmt1‐ kanMX6::mtr4	EMM 32°C Plus 60uM thiamine for 15hours	polyA-enriched cDNA	Lemay et al, NSMB, 2014
nmt1-mtr4	sample_81	31821377	90	51	TRAMP	Bähler	Lemay et al, NSMB, 2014	E-MTAB-2237	h+ ade6-M216 leu1‐32 ura4‐D18 his3‐D1 p81nmt1‐ kanMX6::mtr4	EMM 32°C Plus 60uM thiamine for 15hours	polyA-enriched cDNA	Lemay et al, NSMB, 2014
nmt1-rrp41	sample_82	44981391	90	51	Exosome	Bähler	Lemay et al, NSMB, 2014	E-MTAB-2237	h+ ade6-216 leu1‐32 ura4‐D18 his3‐D1 p81nmt1‐ kanMX6::rrp41	EMM 32°C Plus 60uM thiamine for 15hours	polyA-enriched cDNA	Lemay et al, NSMB, 2014
nmt1-rrp41	sample_83	47850535	90	51	Exosome	Bähler	Lemay et al, NSMB, 2014	E-MTAB-2237	h+ ade6-216 leu1‐32 ura4‐D18 his3‐D1 p81nmt1‐ kanMX6::rrp41	EMM 32°C Plus 60uM thiamine for 15hours	polyA-enriched cDNA	Lemay et al, NSMB, 2014
pan2Δ	sample_84	47174527	90	51	Cytoplasmic degradation	Bähler	Atkinson et al, unpublished	PRJEB7403, sample accession:ERS555574	h- pan2::natMX6 ade6-216	YES 32°C	polyA-enriched cDNA	Atkinson et al, unpublished
pan2Δ	sample_85	54755654	90	51	Cytoplasmic degradation	Bähler	Atkinson et al, unpublished	PRJEB7403, sample accession:ERS555575	h- pan2::natMX6 ade6-216	YES 32°C	polyA-enriched cDNA	Atkinson et al, unpublished
dcr1Δ	sample_86	41724418	90	51	RNAi	Bähler	Volpe et al., Science, 2002	PRJEB7403, sample accession:ERS555576	h‐ Δdcr1::kanMX6, otr1R(Sph1)::ura4, ura4- DS/E, ade6‐M210, leu1‐32, his7‐366	YES 32°C	polyA-enriched cDNA	Atkinson et al, unpublished
dcr1Δ	sample_87	51859729	90	51	RNAi	Bähler	Volpe et al., Science, 2002	PRJEB7403, sample accession:ERS555577	h‐ Δdcr1::kanMX6, otr1R(Sph1)::ura4, ura4- DS/E, ade6‐M210, leu1‐32, his7‐367	YES 32°C	polyA-enriched cDNA	Atkinson et al, unpublished
rdp1Δ	sample_88	54692817	90	51	RNAi	Bähler	Volpe et al., Science, 2002	PRJEB7403, sample accession:ERS555578	h‐ Δrdp1::kanMX6, otr1R(Sph1)::ura4, ura4-­‐ DS/E, ade6-­‐M216, leu1-­‐32, his7-­‐366	YES 32°C	polyA-enriched cDNA	Atkinson et al, unpublished
rdp1Δ	sample_89	43727386	90	51	RNAi	Bähler	Volpe et al., Science, 2002	PRJEB7403, sample accession:ERS555579	h‐ Δrdp1::kanMX6, otr1R(Sph1)::ura4, ura4-­‐ DS/E, ade6-­‐M216, leu1-­‐32, his7-­‐366	YES 32°C	polyA-enriched cDNA	Atkinson et al, unpublished
ago1Δ	sample_90	50282727	90	51	RNAi	Bähler	Volpe et al., Science, 2002	PRJEB7403, sample accession:ERS555580	h- Δago1::kanMX6, otr1R(Sph1)::ura4, ura4-DS/E, ade6-210, leu1-32, his7-366	YES 32°C	polyA-enriched cDNA	Atkinson et al, unpublished
ago1Δ	sample_91	47554478	90	51	RNAi	Bähler	Volpe et al., Science, 2002	PRJEB7403, sample accession:ERS555581	h- Δago1::kanMX6, otr1R(Sph1)::ura4, ura4-DS/E, ade6-210, leu1-32, his7-366	YES 32°C	polyA-enriched cDNA	Atkinson et al, unpublished
exo2Δ	sample_92	41432204	90	51	Cytoplasmic exonuclease	Bähler	Atkinson et al, unpublished	PRJEB7403, sample accession:ERS555582	h- exo2::kanMX6 ade6-216	YES 32°C	polyA-enriched cDNA	Atkinson et al, unpublished
dhp1-ts	sample_93	47474051	90	51	Nuclear exonuclease	Bähler	Shobuike et al, Nucleic Acid Research, 2001	PRJEB7379, sample accession:ERS555097	h+ ade6‐M216 ura4‐D18 leu1‐32 dhp1‐1::ura4+	YES 32°C; heat-shocked at 36°C for 4 hours	polyA-enriched cDNA	This study
dhp1-ts	sample_94	42663608	90	51	Nuclear exonuclease	Bähler	Shobuike et al, Nucleic Acid Research, 2001	PRJEB7379, sample accession:ERS555098	h+ ade6‐M216 ura4‐D18 leu1‐32 dhp1‐1::ura4+	YES 32°C; heat-shocked at 36°C for 4 hours	polyA-enriched cDNA	This study
upf1Δ	sample_95	50850118	90	51	Nonsense Mediated Decay	Bähler	Rodriguez-Gabriel et al., Mol Cell Biol, 2006	PRJEB7403, sample accession:ERS555583	h- upf1::kanMX	YES 32°C	polyA-enriched cDNA	Atkinson et al, unpublished
Veg. growth	sample_127	24899929	90	51	Veg. growth	Bähler	JB21 Bahler lab	PRJEB7379, sample accession:ERS555099	leu1-32 h-	YES 32°C	RiboZero depletion beta kit	This study
Veg. growth	sample_136	36202161	140	76	Veg. growth	Bähler	Livesay et al. Eukaryotic Cell 2013	GSE47573	h- leu1-32 ura4-D18 ade6-M210	YES 25°C	polyA-enriched cDNA, Not Strand specific, paired-end	Livesay et al. Eukaryotic Cell 2013
Veg. growth	sample_137	37950310	140	76	Veg. growth	Bähler	Livesay et al. Eukaryotic Cell 2013	GSE47573	h- leu1-32 ura4-D18 ade6-M210	YES 25°C	polyA-enriched cDNA, Not Strand specific, paired-end	Livesay et al. Eukaryotic Cell 2013
cwf10-ΔNTE	sample_138	32346638	140	76	Splicing compromised	Bähler	Livesay et al. Eukaryotic Cell 2013	GSE47573	h- cwf10 2-127Δ ade6-M21X leu1-32 ura4	YES 25°C	polyA-enriched cDNA, Not Strand specific, paired-end	Livesay et al. Eukaryotic Cell 2013
cwf10-ΔNTE	sample_139	38079325	140	76	Splicing compromised	Bähler	Livesay et al. Eukaryotic Cell 2013	GSE47573	h- cwf10 2-127Δ ade6-M21X leu1-32 ura4	YES 25°C	polyA-enriched cDNA, Not Strand specific, paired-end	Livesay et al. Eukaryotic Cell 2013
dbr1Δ	sample_142	24088951	86	49	Splicing compromised	Bähler	Kim et al., Nat Biotechnol 2010	GSE50246	h+ dbr1::KanMX4 ade6-M216 ura4-D18 leu1-32	YES 32°C	RiboZero depletion beta kit	Bitton et al. Genome Research 2014
dbr1Δ	sample_143	19677647	86	49	Splicing compromised	Bähler	Kim et al., Nat Biotechnol 2010	GSE50246	h+ dbr1::KanMX4 ade6-M216 ura4-D18 leu1-33	YES 32°C	RiboZero depletion beta kit	Bitton et al. Genome Research 2014
Veg. growth	sample_144	24884157	86	49	Veg. growth	Bähler	Kim et al., Nat Biotechnol 2010	GSE50246	h+ ade6-M216 ura4-D18 leu1-32	YES 32°C	RiboZero depletion beta kit	Bitton et al. Genome Research 2014
Veg. growth	sample_145	35691739	86	49	Veg. growth	Bähler	Kim et al., Nat Biotechnol 2010	GSE50246	h+ ade6-M216 ura4-D18 leu1-32	YES 32°C	RiboZero depletion beta kit	Bitton et al. Genome Research 2014
dis3L2Δ	sample_150	36473633	90	51	Cytoplasmic degradation	Bähler	Malecki et al., Embo J , 2013	PRJEB7403, sample accession:ERS555584	h- dis3l2::KanMS6	YES 32°C	polyA-enriched cDNA	Atkinson et al, unpublished
dis3L2Δ	sample_151	36377765	90	51	Cytoplasmic degradation	Bähler	Malecki et al., Embo J , 2013	PRJEB7403, sample accession:ERS555585	h- dis3l2::KanMS6	YES 32°C	polyA-enriched cDNA	Atkinson et al, unpublished
lsm1Δ	sample_152	45555974	90	51	Cytoplasmic degradation	Bähler	Malecki et al., Embo J , 2013	PRJEB7403, sample accession:ERS555586	h- lsm1::hph	YES 32°C	polyA-enriched cDNA	Atkinson et al, unpublished
lsm1Δ	sample_153	46830980	90	51	Cytoplasmic degradation	Bähler	Malecki et al., Embo J , 2013	PRJEB7403, sample accession:ERS555587	h- lsm1::hph	YES 32°C	polyA-enriched cDNA	Atkinson et al, unpublished
ski2Δ	sample_154	56069263	90	51	Cytoplasmic degradation	Bähler	Malecki et al., Embo J , 2013	PRJEB7403, sample accession:ERS555588	h- ski2::hph	YES 32°C	polyA-enriched cDNA	Atkinson et al, unpublished
ski2Δ	sample_155	46291664	90	51	Cytoplasmic degradation	Bähler	Malecki et al., Embo J , 2013	PRJEB7403, sample accession:ERS555589	h- ski2::hph	YES 32°C	polyA-enriched cDNA	Atkinson et al, unpublished
dis3L2_lsm1Δ	sample_156	41524225	90	51	Cytoplasmic degradation	Bähler	Malecki et al., Embo J , 2013	PRJEB7403, sample accession:ERS555590	h- dis3l2::KanMS6 lsm1::hph	YES 32°C	polyA-enriched cDNA	Atkinson et al, unpublished
dis3L2_lsm1Δ	sample_157	45403730	90	51	Cytoplasmic degradation	Bähler	Malecki et al., Embo J , 2013	PRJEB7403, sample accession:ERS555591	h- dis3l2::KanMS6 lsm1::hph	YES 32°C	polyA-enriched cDNA	Atkinson et al, unpublished
dis3L2_ski2Δ	sample_158	50707889	90	51	Cytoplasmic degradation	Bähler	Malecki et al., Embo J , 2013	PRJEB7403, sample accession:ERS555592	h- dis3l2::KanMS6 ski2::hph	YES 32°C	polyA-enriched cDNA	Atkinson et al, unpublished
dis3L2_ski2Δ	sample_159	37543390	90	51	Cytoplasmic degradation	Bähler	Malecki et al., Embo J , 2013	PRJEB7403, sample accession:ERS555593	h- dis3l2::KanMS6 ski2::hph	YES 32°C	polyA-enriched cDNA	Atkinson et al, unpublished
ago1Δ	sample_160	42383628	90	51	RNAi	Bähler	Volpe et al., Science, 2002	PRJEB7403, sample accession:ERS555594	h- Δago1::kanMX6, otr1R(Sph1)::ura4, ura4-DS/E, ade6-210, leu1-32, his7-366		polyA-enriched cDNA	Atkinson et al, unpublished
rrp6Δ	sample_161	41459169	90	51	Exosome	Bähler	Lemay et al., Mol Cell, 2010	PRJEB7403, sample accession:ERS555595	h+ ade6-M216 leu1-32 ura4-D18 his3-D1 rrp6::URA4	YES 32°C	polyA-enriched cDNA	Atkinson et al, unpublished
rrp6Δ	sample_162	37268009	90	51	Exosome	Bähler	Lemay et al., Mol Cell, 2010	PRJEB7403, sample accession:ERS555596	h+ ade6-M216 leu1-32 ura4-D18 his3-D1 rrp6::URA4	YES 32°C	polyA-enriched cDNA	Atkinson et al, unpublished
Meiosis_0h	sample_163	42447951	90	51	Meiosis	Bähler	Duncan & Mata, NSMB, 2014	PRJEB7403, sample accession:ERS555597	pat1-114/pat1‐114 ade6‐ M210/ade6‐M216 h+/h+	EMM-Nitrogen depleted for 14 hours 25°C for synchronisation at G1, then EMM+0.5g/L Nitrogen, samples were taken just before shifting temperature to 34°C	polyA-enriched cDNA	Atkinson et al, unpublished
Meiosis_2h	sample_164	49469483	90	51	Meiosis	Bähler	Duncan & Mata, NSMB, 2014	PRJEB7403, sample accession:ERS555598	pat1-114/pat1‐114 ade6‐ M210/ade6‐M216 h+/h+	EMM+0.5g/L Nitrogen at 34°C for 2 hours	polyA-enriched cDNA	Atkinson et al, unpublished
Meiosis_4h	sample_165	53727968	90	51	Meiosis	Bähler	Duncan & Mata, NSMB, 2014	PRJEB7403, sample accession:ERS555599	pat1-114/pat1‐114 ade6‐ M210/ade6‐M216 h+/h+	EMM+0.5g/LNitrogen at 34°C for 4 hours	polyA-enriched cDNA	Atkinson et al, unpublished
Meiosis_6h	sample_166	45018142	90	51	Meiosis	Bähler	Duncan & Mata, NSMB, 2014	PRJEB7403, sample accession:ERS555600	pat1-114/pat1‐114 ade6‐ M210/ade6‐M216 h+/h+	EMM+0.5g/L Nitrogen at 34°C for 6 hours	polyA-enriched cDNA	Atkinson et al, unpublished
Meiosis_0h	sample_167	39127456	90	51	Meiosis	Bähler	Duncan & Mata, NSMB, 2014	PRJEB7403, sample accession:ERS555601	pat1-114/pat1‐114 ade6‐ M210/ade6‐M216 h+/h+	EMM-Nitrogen depleted for 14 hours 25°C for synchronisation at G1, then EMM+0.5g/L Nitrogen, samples were taken just before shifting temperature to 34°C	polyA-enriched cDNA	Atkinson et al, unpublished
Meiosis_2h	sample_168	33777770	90	51	Meiosis	Bähler	Duncan & Mata, NSMB, 2014	PRJEB7403, sample accession:ERS555602	pat1-114/pat1‐114 ade6‐ M210/ade6‐M216 h+/h+	EMM+0.5g/L Nitrogen at 34°C for 2 hours	polyA-enriched cDNA	Atkinson et al, unpublished
Meiosis_4h	sample_169	40581467	90	51	Meiosis	Bähler	Duncan & Mata, NSMB, 2014	PRJEB7403, sample accession:ERS555603	pat1-114/pat1‐114 ade6‐ M210/ade6‐M216 h+/h+	EMM+0.5g/L Nitrogen at 34°C for 4 hours	polyA-enriched cDNA	Atkinson et al, unpublished
Meiosis_6h	sample_170	40670561	90	51	Meiosis	Bähler	Duncan & Mata, NSMB, 2014	PRJEB7403, sample accession:ERS555604	pat1-114/pat1‐114 ade6‐ M210/ade6‐M216 h+/h+	EMM+0.5g/L Nitrogen at 34°C for 6 hours	polyA-enriched cDNA	Atkinson et al, unpublished
Meiosis_8h	sample_171	46719796	90	51	Meiosis	Bähler	Duncan & Mata, NSMB, 2014	PRJEB7403, sample accession:ERS555605	pat1-114/pat1‐114 ade6‐ M210/ade6‐M216 h+/h+	EMM+0.5g/L Nitrogen at 34°C for 8 hours	polyA-enriched cDNA	Atkinson et al, unpublished
Meiosis_8h	sample_172	45019711	90	51	Meiosis	Bähler	Duncan & Mata, NSMB, 2014	PRJEB7403, sample accession:ERS555606	pat1-114/pat1‐114 ade6‐ M210/ade6‐M216 h+/h+	EMM+0.5g/L Nitrogen at 34°C for 8 hours	polyA-enriched cDNA	Atkinson et al, unpublished
prp2-ts	sample_173	6160371	88	50	Splicing compromised	Bähler	Potashkin et al, Embo J, 1989	PRJEB7379, sample accession:ERS555100	prp2-1 leu1-32 h-	YES 32°C; heat-shocked at 37°C for 2.5 hours	RiboZero depletion beta kit	This study
prp2-ts	sample_174	7310158	88	50	Splicing compromised	Bähler	Potashkin et al, Embo J, 1989	PRJEB7379, sample accession:ERS555101	prp2-1 leu1-32 h-	YES 32°C; heat-shocked at 37°C for 2.5 hours	RiboZero depletion beta kit	This study
Veg. growth	sample_177	53998214	90	51	Veg. growth	Bähler	Lemay et al., Mol Cell, 2010	PRJEB7403, sample accession:ERS555607	h+ ade6-M216 leu1-32 ura4-D18 his3D1	YES 32°C	polyA-enriched cDNA	Atkinson et al, unpublished
ski7Δ	sample_178	46892388	90	51	Cytoplasmic degradation	Bähler	Lemay et al., Mol Cell, 2010	PRJEB7403, sample accession:ERS555608	h+ ade6M210 leu1-32 ura4Δ18 his3Δ1 ski7::kanMX6	YES 32°C	polyA-enriched cDNA	Atkinson et al, unpublished
ski7Δ	sample_179	42629850	90	51	Cytoplasmic degradation	Bähler	Lemay et al., Mol Cell, 2010	PRJEB7403, sample accession:ERS555609	h+ ade6M210 leu1-32 ura4Δ18 his3Δ1 ski7::kanMX6	YES 32°C	polyA-enriched cDNA	Atkinson et al, unpublished
nab2Δ	sample_180	45295715	90	51	Poly-(A) binding	Bähler	St Saveur et al., MCB, 2013	PRJEB7403, sample accession:ERS555610	h+ ade6M210 leu1-32 ura4Δ18 his3Δ1 nab2::kanMX6	YES 32°C	polyA-enriched cDNA	Atkinson et al, unpublished
nab2Δ	sample_181	48179522	90	51	Poly-(A) binding	Bähler	St Saveur et a., MCB, 2013	PRJEB7403, sample accession:ERS555611	h+ ade6M210 leu1-32 ura4Δ18 his3Δ1 nab2::kanMX6	YES 32°C	polyA-enriched cDNA	Atkinson et al, unpublished
Stationary	sample_182	44128405	90	51	Stationary phase	Bähler	Atkinson et al, unpublished	PRJEB7403, sample accession:ERS555612	h- 972	EMM 32°C; Harvested as soon as reached stationary phase	polyA-enriched cDNA	Atkinson et al, unpublished
Stationary	sample_183	38829248	90	51	Stationary phase	Bähler	Atkinson et al, unpublished	PRJEB7403, sample accession:ERS555613	h- 972	EMM 32°C; Harvested deep in stationary phase when viability dropped to 50% (assesed by CFU)	polyA-enriched cDNA	Atkinson et al, unpublished
Quiescence	sample_190	39504712	90	51	Quiescence	Bähler	Atkinson et al, unpublished	PRJEB7403, sample accession:ERS555614	h- 972	EMM 32°C; Shifted to minus nitrogen media for 7 days	polyA-enriched cDNA	Atkinson et al, unpublished
cid14Δ	sample_191	53615733	90	51	TRAMP	Bähler	Lemay et al., Mol Cell, 2010	PRJEB7403, sample accession:ERS555615	h- ade6-M210 leu1-32 ura4-D18 his3-D1 cid14::URA4	YES 32°C	polyA-enriched cDNA	Atkinson et al, unpublished
cid14Δ	sample_192	54759323	90	51	TRAMP	Bähler	Lemay et al., Mol Cell, 2010	PRJEB7403, sample accession:ERS555616	h- ade6-M210 leu1-32 ura4-D18 his3-D1 cid14::URA4	YES 32°C	polyA-enriched cDNA	Atkinson et al, unpublished
Veg. growth	sample_193	21609959	90	51	Veg. growth	Schwer	Schwer et al., Proc Natl Acad Sci, 2014	GSE52370	h- ade6 ura4-D18 leu1–32	YES 30°C till they reached OD600 0.4 -0.7	polyA-enriched cDNA, Paired-end	Schwer et al. PNAS , 2014
Veg. growth	sample_194	22284397	90	51	Veg. growth	Schwer	Schwer et al., Proc Natl Acad Sci, 2014	GSE52370	h- ade6 ura4-D18 leu1–32	YES 30°C till they reached OD600 0.4 -0.7	polyA-enriched cDNA, Paired-end	Schwer et al. PNAS , 2014
Y1F	sample_195	21695617	90	51	Transcription compromised	Schwer	Schwer et al., Proc Natl Acad Sci, 2014	GSE52370	h- ade6 ura4-D18 leu1–32	YES 30°C till they reached OD600 0.4 -0.7	polyA-enriched cDNA, Paired-end	Schwer et al. PNAS , 2014
Y1F	sample_196	23565149	90	51	Transcription compromised	Schwer	Schwer et al., Proc Natl Acad Sci, 2014	GSE52370	h- ade6 ura4-D18 leu1–32	YES 30°C till they reached OD600 0.4 -0.7	polyA-enriched cDNA, Paired-end	Schwer et al. PNAS , 2014
S2A	sample_197	26157568	90	51	Transcription compromised	Schwer	Schwer et al., Proc Natl Acad Sci, 2014	GSE52370	h+ ade6 ura4-D18 leu1–32	YES 30°C till they reached OD600 0.4 -0.7	polyA-enriched cDNA, Paired-end	Schwer et al. PNAS , 2014
S2A	sample_198	21839717	90	51	Transcription compromised	Schwer	Schwer et al., Proc Natl Acad Sci, 2014	GSE52370	h+ ade6 ura4-D18 leu1–32	YES 30°C till they reached OD600 0.4 -0.7	polyA-enriched cDNA, Paired-end	Schwer et al. PNAS , 2014
T4A	sample_199	30146189	90	51	Transcription compromised	Schwer	Schwer et al., Proc Natl Acad Sci, 2014	GSE52370	h- ade6 ura4-D18 leu1–32	YES 30°C till they reached OD600 0.4 -0.7	polyA-enriched cDNA, Paired-end	Schwer et al. PNAS , 2014
T4A	sample_200	21507147	90	51	Transcription compromised	Schwer	Schwer et al., Proc Natl Acad Sci, 2014	GSE52370	h- ade6 ura4-D18 leu1–32	YES 30°C till they reached OD600 0.4 -0.7	polyA-enriched cDNA, Paired-end	Schwer et al. PNAS , 2014
S7A	sample_201	27041449	90	51	Transcription compromised	Schwer	Schwer et al., Proc Natl Acad Sci, 2014	GSE52370	h- ade6 ura4-D18 leu1–32	YES 30°C till they reached OD600 0.4 -0.7	polyA-enriched cDNA, Paired-end	Schwer et al. PNAS , 2014
S7A	sample_202	21079905	90	51	Transcription compromised	Schwer	Schwer et al., Proc Natl Acad Sci, 2014	GSE52370	h- ade6 ura4-D18 leu1–32	YES 30°C till they reached OD600 0.4 -0.7	polyA-enriched cDNA, Paired-end	Schwer et al. PNAS , 2014
Y1F_S7A	sample_203	30754787	90	51	Transcription compromised	Schwer	Schwer et al., Proc Natl Acad Sci, 2014	GSE52370	h- ade6 ura4-D18 leu1–32	YES 30°C till they reached OD600 0.4 -0.7	polyA-enriched cDNA, Paired-end	Schwer et al. PNAS , 2014
Y1F_S7A	sample_204	20264796	90	51	Transcription compromised	Schwer	Schwer et al., Proc Natl Acad Sci, 2014	GSE52370	h- ade6 ura4-D18 leu1–32	YES 30°C till they reached OD600 0.4 -0.7	polyA-enriched cDNA, Paired-end	Schwer et al. PNAS , 2014
S2A_S7A	sample_205	27442991	90	51	Transcription compromised	Schwer	Schwer et al., Proc Natl Acad Sci, 2014	GSE52370	h- ade6 ura4-D18 leu1–32	YES 30°C till they reached OD600 0.4 -0.7	polyA-enriched cDNA, Paired-end	Schwer et al. PNAS , 2014
S2A_S7A	sample_206	19175660	90	51	Transcription compromised	Schwer	Schwer et al., Proc Natl Acad Sci, 2014	GSE52370	h- ade6 ura4-D18 leu1–32	YES 30°C till they reached OD600 0.4 -0.7	polyA-enriched cDNA, Paired-end	Schwer et al. PNAS , 2014
T4A_S7A	sample_207	31586495	90	51	Transcription compromised	Schwer	Schwer et al., Proc Natl Acad Sci, 2014	GSE52370	h- ade6 ura4-D18 leu1–32	YES 30°C till they reached OD600 0.4 -0.7	polyA-enriched cDNA, Paired-end	Schwer et al. PNAS , 2014
T4A_S7A	sample_208	20732602	90	51	Transcription compromised	Schwer	Schwer et al., Proc Natl Acad Sci, 2014	GSE52370	h- ade6 ura4-D18 leu1–32	YES 30°C till they reached OD600 0.4 -0.7	polyA-enriched cDNA, Paired-end	Schwer et al. PNAS , 2014

## Sheet: S2
Supplemental Table S2. Exon-skipping events identified by RNA-seq; total number of diagnostic exon-skipping reads for each exon-skipping event is provided.
Flanking exons	Skipped exon/s id	Skipped exon/s length	Number of exon/s skipped	Veg.growth_sample_12	Veg.growth_sample_13	Veg.growth_sample_17	Veg.growth_sample_19	Veg.growth_sample_20	Veg.growth_sample_21	Veg.growth_sample_22	Veg.growth_sample_27	Veg.growth_sample_69	Veg.growth_sample_72	Veg.growth_sample_73	Veg.growth_sample_127	Veg.growth_sample_136	Veg.growth_sample_137	Veg.growth_sample_144	Veg.growth_sample_145	Veg.growth_sample_177	Veg.growth_sample_194	Veg.growth_sample_193	spt6_sample_9	spt6_sample_10	spt6_sample_34	rpb4_sample_16	Y1F_sample_195	Y1F_sample_196	S2A_sample_197	S2A_sample_198	T4A_sample_199	T4A_sample_200	S7A_sample_201	S7A_sample_202	Y1F_S7A_sample_203	Y1F_S7A_sample_204	S2A_S7A_sample_205	S2A_S7A_sample_206	T4A_S7A_sample_207	T4A_S7A_sample_208	mtr4_sample_80	mtr4_sample_81	cid14_sample_191	cid14_sample_192	Stationary_sample_30	Stationary_sample_31	Stationary_sample_71	Stationary_sample_182	Stationary_sample_183
SPAC806.04c.1:exon:4-SPAC806.04c.1:exon:1	SPAC806.04c.1:exon:3;SPAC806.04c.1:exon:2	1180	2	0	0	0	0	0	0	0	0	0	0	0	0	0	0	0	0	1	0	0	1	0	0	0	0	0	0	0	0	0	0	0	0	0	0	0	0	0	0	0	0	0	0	0	0	1	0
SPAC1F5.10.1:exon:3-SPAC1F5.10.1:exon:1	SPAC1F5.10.1:exon:2	21	1	0	2	1	0	0	0	0	0	5	0	1	2	0	3	0	1	2	0	0	0	1	0	0	2	1	4	2	2	1	0	0	3	2	2	1	2	0	0	1	1	2	0	0	2	1	1
SPAC18B11.07c.1:exon:1-SPAC18B11.07c.1:exon:3	SPAC18B11.07c.1:exon:2	65	1	0	1	0	0	0	0	0	0	0	0	0	0	0	0	0	0	0	0	0	0	0	0	1	0	0	0	0	0	0	0	0	0	0	0	0	0	0	0	0	1	1	0	0	1	0	0
SPAC18B11.07c.1:exon:2-SPAC18B11.07c.1:exon:5	SPAC18B11.07c.1:exon:3;SPAC18B11.07c.1:exon:4	225	2	0	0	0	0	0	0	0	0	0	0	0	0	0	0	0	0	0	0	0	0	0	0	0	0	0	0	0	0	0	0	0	0	0	0	0	0	0	0	0	0	0	0	0	0	0	0
SPAC18B11.07c.1:exon:3-SPAC18B11.07c.1:exon:5	SPAC18B11.07c.1:exon:4	104	1	0	0	0	0	0	0	0	0	0	0	0	1	0	0	0	0	0	1	0	0	1	0	0	0	1	0	0	0	0	0	0	0	0	0	0	0	0	0	1	0	0	0	0	0	0	0
SPAC1751.02c.1:exon:3-SPAC1751.02c.1:exon:1	SPAC1751.02c.1:exon:2	106	1	0	0	1	0	0	0	0	0	0	0	0	1	2	3	0	1	1	1	4	0	0	1	0	3	3	2	3	1	6	0	0	0	2	1	0	0	0	1	1	1	1	0	0	1	0	0
SPAC1751.03.1:exon:1-SPAC1751.03.1:exon:3	SPAC1751.03.1:exon:2	157	1	0	0	0	0	0	0	0	0	0	0	0	0	0	0	0	0	1	0	0	0	0	1	0	0	0	2	0	0	0	0	0	0	0	0	0	1	0	0	0	3	1	0	0	0	0	0
SPAC227.10.1:exon:2-SPAC227.10.1:exon:4	SPAC227.10.1:exon:3	124	1	0	0	0	0	0	0	0	0	0	1	1	0	3	1	1	0	0	0	0	0	0	0	0	3	0	0	0	0	0	0	0	0	1	0	0	0	0	0	0	0	0	0	0	0	1	0
SPAC13A11.04c.1:exon:4-SPAC13A11.04c.1:exon:2	SPAC13A11.04c.1:exon:3	298	1	0	0	0	0	0	0	0	0	0	0	0	1	0	0	0	0	0	0	0	0	1	0	0	0	0	0	0	0	0	0	0	0	0	0	0	0	0	0	0	0	0	0	0	0	0	2
SPAC1D4.02c.1:exon:4-SPAC1D4.02c.1:exon:2	SPAC1D4.02c.1:exon:3	121	1	0	0	0	0	0	0	0	0	0	0	1	0	0	0	2	1	0	0	0	0	0	0	0	0	0	0	0	0	0	0	0	0	0	4	0	0	0	0	1	0	0	0	0	0	0	0
SPAC1D4.02c.1:exon:3-SPAC1D4.02c.1:exon:1	SPAC1D4.02c.1:exon:2	188	1	0	0	0	0	0	0	0	0	0	0	0	0	0	0	0	0	0	0	0	0	0	0	0	0	0	0	0	0	0	0	0	0	0	0	0	0	0	0	0	0	0	0	0	0	0	0
SPAC22F3.05c.1:exon:2-SPAC22F3.05c.1:exon:4	SPAC22F3.05c.1:exon:3	73	1	13	19	4	2	1	5	3	3	3	18	17	8	2	4	9	7	21	0	0	3	6	0	0	0	3	1	5	0	3	3	1	0	0	0	0	0	0	39	36	27	34	3	1	0	16	25
SPAC22F3.03c.1:exon:8-SPAC22F3.03c.1:exon:11	SPAC22F3.03c.1:exon:9;SPAC22F3.03c.1:exon:10	257	2	0	0	0	0	0	0	0	0	0	0	0	0	0	0	0	0	0	0	0	0	0	0	0	0	0	0	0	0	0	0	0	0	0	0	0	0	0	0	0	0	0	0	0	0	0	0
SPAC22F3.03c.1:exon:12-SPAC22F3.03c.1:exon:14	SPAC22F3.03c.1:exon:13	70	1	0	0	0	0	0	0	0	0	0	1	1	0	2	2	0	0	0	0	0	0	0	0	0	0	0	0	0	0	0	0	1	0	0	2	0	0	0	0	0	0	0	0	0	0	0	0
SPAC22G7.04.1:exon:1-SPAC22G7.04.1:exon:4	SPAC22G7.04.1:exon:2;SPAC22G7.04.1:exon:3	266	2	0	0	0	0	0	0	0	0	0	0	0	0	0	0	0	0	0	0	0	0	0	0	0	0	0	0	0	0	0	0	0	0	0	0	0	0	0	0	0	1	0	0	0	0	0	0
SPAC22G7.09c.1:exon:4-SPAC22G7.09c.1:exon:2	SPAC22G7.09c.1:exon:3	109	1	0	0	0	0	0	0	0	0	0	0	0	0	0	2	0	0	0	0	0	0	0	0	0	0	0	0	0	0	0	0	0	0	0	0	0	0	1	0	0	0	1	0	0	0	0	0
SPAC16C9.04c.1:exon:3-SPAC16C9.04c.1:exon:1	SPAC16C9.04c.1:exon:2	180	1	0	0	0	0	0	0	0	0	0	0	0	0	0	0	0	0	0	0	0	0	0	0	0	0	0	0	0	0	0	0	0	0	0	0	0	0	0	0	0	1	1	0	0	0	0	0
SPAC1687.03c.1:exon:3-SPAC1687.03c.1:exon:1	SPAC1687.03c.1:exon:2	112	1	0	4	1	0	0	0	0	0	0	4	1	3	1	1	0	1	4	2	1	0	1	0	2	1	0	0	0	1	1	4	0	0	0	1	0	3	0	8	7	20	7	0	0	0	0	1
SPAC1687.21.1:exon:1-SPAC1687.21.1:exon:3	SPAC1687.21.1:exon:2	123	1	0	0	0	0	0	0	0	0	0	0	0	0	0	0	0	0	0	0	0	0	0	0	0	0	0	0	0	0	0	0	0	0	0	0	0	0	0	0	1	0	0	0	0	0	0	0
SPAC1687.21.1:exon:1-SPAC1687.21.1:exon:5	SPAC1687.21.1:exon:2;SPAC1687.21.1:exon:3;SPAC1687.21.1:exon:4	211	3	0	0	1	0	0	0	0	0	0	1	0	0	0	0	0	1	0	0	0	0	0	0	0	0	0	0	0	0	0	0	0	0	0	0	0	0	0	0	1	0	0	0	0	0	0	0
SPAC1687.21.1:exon:3-SPAC1687.21.1:exon:5	SPAC1687.21.1:exon:4	22	1	1	0	0	0	1	0	0	1	1	2	1	1	0	1	0	0	1	0	0	0	0	1	0	0	0	1	1	0	1	0	0	0	2	0	0	0	0	3	3	1	1	1	2	0	0	0
SPAC222.15.1:exon:2-SPAC222.15.1:exon:4	SPAC222.15.1:exon:3	102	1	0	0	0	0	0	0	0	0	0	0	0	0	0	0	0	0	0	0	0	0	0	0	0	0	0	0	0	0	0	0	0	0	0	0	0	0	0	0	0	0	0	0	0	0	0	0
SPAC222.16c.1:exon:6-SPAC222.16c.1:exon:3	SPAC222.16c.1:exon:5;SPAC222.16c.1:exon:4	246	2	0	0	0	0	0	0	0	0	0	0	0	0	0	0	0	0	0	0	0	0	0	0	0	0	0	0	0	0	0	0	0	0	0	0	0	0	0	0	0	0	0	0	0	0	0	0
SPAC222.16c.1:exon:4-SPAC222.16c.1:exon:1	SPAC222.16c.1:exon:3;SPAC222.16c.1:exon:2	237	2	0	0	0	0	0	0	0	0	0	0	0	0	0	0	0	0	0	0	0	1	0	0	0	0	0	0	0	0	0	0	0	0	0	0	0	0	0	0	0	0	0	0	0	0	0	0
SPAC139.06.1:exon:1-SPAC139.06.1:exon:3	SPAC139.06.1:exon:2	104	1	0	0	0	0	0	0	0	0	0	0	0	0	0	0	0	0	1	0	0	0	1	0	0	0	0	0	0	0	0	0	0	0	0	0	0	0	0	0	0	0	0	0	0	0	0	0
SPAC30D11.13.1:exon:3-SPAC30D11.13.1:exon:1	SPAC30D11.13.1:exon:2	80	1	0	0	0	0	0	0	0	0	0	0	0	0	0	0	0	0	0	0	0	0	0	0	0	0	0	0	2	0	0	0	0	0	0	0	0	0	0	0	0	0	0	0	0	0	0	0
SPAC30D11.12.1:exon:3-SPAC30D11.12.1:exon:1	SPAC30D11.12.1:exon:2	187	1	1	0	0	0	0	0	0	0	0	0	0	0	0	0	0	0	0	0	0	0	0	0	0	0	0	0	0	0	0	0	0	0	0	0	0	0	0	0	0	0	0	0	0	0	0	0
SPAC56F8.05c.1:exon:5-SPAC56F8.05c.1:exon:3	SPAC56F8.05c.1:exon:4	48	1	0	0	0	0	0	0	0	0	0	0	0	1	1	0	0	0	0	0	0	0	0	0	0	0	0	0	0	1	0	0	0	0	0	0	0	0	0	0	0	0	0	0	0	0	0	0
SPAC22A12.08c.1:exon:4-SPAC22A12.08c.1:exon:2	SPAC22A12.08c.1:exon:3	495	1	0	0	0	0	0	0	0	0	0	0	0	2	0	0	0	0	0	0	0	0	0	0	0	0	1	0	0	0	1	0	1	0	0	0	0	0	0	0	0	0	0	0	0	0	0	0
SPAC22A12.09c.1:exon:4-SPAC22A12.09c.1:exon:2	SPAC22A12.09c.1:exon:3	317	1	0	0	0	0	0	0	0	0	0	0	0	0	0	0	0	0	0	0	0	0	0	0	0	0	0	0	0	0	0	0	0	0	0	0	0	0	0	0	0	0	0	0	0	0	0	0
SPAC6F12.07.1:exon:1-SPAC6F12.07.1:exon:3	SPAC6F12.07.1:exon:2	60	1	0	0	0	0	0	0	0	0	0	0	0	0	0	0	0	0	0	0	0	0	0	0	0	0	0	0	0	0	0	0	0	0	0	0	0	0	0	0	0	0	0	0	0	0	0	0
SPAC6F12.07.1:exon:2-SPAC6F12.07.1:exon:4	SPAC6F12.07.1:exon:3	186	1	1	3	3	0	0	0	0	2	1	7	5	0	2	4	1	3	5	0	0	0	0	0	0	0	0	0	0	2	0	0	0	5	0	0	1	4	0	6	3	13	12	0	0	0	0	0
SPAC5D6.05.1:exon:4-SPAC5D6.05.1:exon:1	SPAC5D6.05.1:exon:3;SPAC5D6.05.1:exon:2	229	2	0	0	0	0	0	0	0	0	0	0	0	0	0	0	0	0	0	0	0	0	0	0	0	0	0	0	0	0	0	0	0	0	0	0	0	0	0	0	0	0	0	0	0	0	0	0
SPAC167.07c.1:exon:1-SPAC167.07c.1:exon:3	SPAC167.07c.1:exon:2	57	1	1	0	0	0	0	0	0	0	0	0	0	1	0	0	0	0	0	0	1	0	0	0	0	2	2	2	0	0	1	0	0	0	0	0	0	0	0	0	0	0	0	0	0	0	0	0
SPAC167.02.1:exon:3-SPAC167.02.1:exon:1	SPAC167.02.1:exon:2	134	1	0	0	0	0	0	0	0	0	0	0	0	0	0	0	0	0	1	0	1	0	0	0	0	0	1	0	0	0	0	0	0	0	0	0	0	0	0	0	0	0	0	0	1	0	0	0
SPAC23H4.04.1:exon:3-SPAC23H4.04.1:exon:1	SPAC23H4.04.1:exon:2	62	1	2	1	2	0	0	0	0	1	0	2	2	3	1	2	0	1	3	1	0	2	0	0	0	0	0	0	0	0	0	0	1	0	0	0	0	0	0	0	1	1	1	1	0	0	1	0
SPAP27G11.12.1:exon:2-SPAP27G11.12.1:exon:4	SPAP27G11.12.1:exon:3	33	1	0	0	0	0	0	0	0	0	0	0	0	0	0	0	0	1	0	0	0	0	0	0	0	0	0	0	0	0	0	0	0	0	0	0	0	0	0	0	1	1	0	0	0	0	1	0
SPAC343.14c.1:exon:3-SPAC343.14c.1:exon:1	SPAC343.14c.1:exon:2	391	1	0	0	1	1	0	0	1	0	0	3	0	0	0	0	0	0	0	0	0	0	0	0	1	0	0	0	0	0	0	0	0	0	0	0	0	0	0	4	1	1	1	0	0	0	0	0
SPAC824.05.1:exon:2-SPAC824.05.1:exon:5	SPAC824.05.1:exon:3;SPAC824.05.1:exon:4	192	2	0	0	0	0	0	0	0	0	0	0	0	0	0	0	0	0	0	0	0	0	0	0	0	0	0	0	0	0	0	0	0	0	0	0	0	0	0	0	0	0	0	0	0	0	0	0
SPAC824.09c.1:exon:5-SPAC824.09c.1:exon:3	SPAC824.09c.1:exon:4	44	1	0	0	0	0	0	1	0	0	0	1	0	0	0	0	0	0	0	1	1	0	0	0	0	0	2	0	1	0	0	0	2	2	0	0	2	1	0	0	1	1	2	0	0	0	0	0
SPAC824.09c.1:exon:5-SPAC824.09c.1:exon:2	SPAC824.09c.1:exon:4;SPAC824.09c.1:exon:3	123	2	0	1	0	0	0	0	0	0	0	1	0	0	0	1	0	0	0	0	0	0	0	0	0	0	1	1	0	0	0	0	0	0	0	0	0	0	0	0	1	0	0	0	0	0	0	0
SPAC664.08c.1:exon:4-SPAC664.08c.1:exon:2	SPAC664.08c.1:exon:3	48	1	0	0	0	0	0	0	0	0	0	0	0	0	0	0	0	0	0	0	0	0	0	0	0	1	4	0	0	0	3	0	0	0	2	0	0	3	0	0	1	0	0	0	0	0	1	0
SPACUNK12.02c.1:exon:4-SPACUNK12.02c.1:exon:2	SPACUNK12.02c.1:exon:3	91	1	0	0	0	0	0	0	0	0	0	0	0	0	0	0	0	0	0	0	0	0	0	0	0	0	0	0	0	0	0	0	0	0	0	0	0	0	0	0	0	0	0	0	0	0	0	0
SPAC1002.07c.1:exon:6-SPAC1002.07c.1:exon:2	SPAC1002.07c.1:exon:5;SPAC1002.07c.1:exon:4;SPAC1002.07c.1:exon:3	185	3	0	0	1	0	0	0	0	0	0	2	2	0	0	0	0	2	2	1	0	0	0	0	1	0	0	0	0	0	2	0	0	2	0	0	0	0	0	0	2	0	1	0	0	0	0	1
SPAC1002.07c.1:exon:6-SPAC1002.07c.1:exon:1	SPAC1002.07c.1:exon:5;SPAC1002.07c.1:exon:4;SPAC1002.07c.1:exon:3;SPAC1002.07c.1:exon:2	296	4	0	0	0	0	0	0	0	0	1	1	1	0	0	0	2	0	0	1	0	0	0	1	0	0	0	1	2	0	1	0	0	0	0	1	0	0	2	0	0	0	2	0	0	0	0	1
SPAC1002.07c.1:exon:5-SPAC1002.07c.1:exon:3	SPAC1002.07c.1:exon:4	35	1	0	1	0	0	0	0	0	1	1	3	1	1	3	1	0	2	5	0	0	0	0	0	2	2	1	0	2	3	1	0	3	0	0	1	0	0	0	3	2	0	2	0	0	0	0	0
SPAC1002.07c.1:exon:3-SPAC1002.07c.1:exon:1	SPAC1002.07c.1:exon:2	111	1	0	0	0	0	0	0	0	0	0	1	1	2	1	1	0	0	0	0	0	0	0	0	0	0	0	0	1	0	0	0	4	2	3	1	0	1	1	1	2	1	3	0	0	0	0	0
SPAC9G1.05.1:exon:2-SPAC9G1.05.1:exon:4	SPAC9G1.05.1:exon:3	102	1	2	1	1	0	0	0	0	0	0	2	1	0	0	0	0	1	0	0	0	0	0	0	2	0	0	0	0	0	0	0	0	0	0	0	0	0	0	0	1	4	1	0	0	0	4	1
SPAC9G1.05.1:exon:4-SPAC9G1.05.1:exon:6	SPAC9G1.05.1:exon:5	46	1	0	0	1	0	0	0	0	0	0	0	0	1	0	2	0	0	1	0	1	0	0	0	1	0	0	2	3	0	0	0	0	0	0	0	0	0	0	3	2	4	2	0	0	0	1	1
SPAC732.01.1:exon:3-SPAC732.01.1:exon:6	SPAC732.01.1:exon:4;SPAC732.01.1:exon:5	107	2	1	1	1	0	0	0	0	0	0	1	0	0	0	0	0	0	0	0	0	0	0	0	0	0	0	0	0	0	0	0	0	0	0	0	0	0	0	0	1	1	1	0	0	0	0	0
SPAC17G8.04c.1:exon:4-SPAC17G8.04c.1:exon:1	SPAC17G8.04c.1:exon:3;SPAC17G8.04c.1:exon:2	250	2	0	0	0	0	0	0	0	0	0	0	0	0	0	0	0	0	0	0	0	0	0	0	1	0	0	0	0	0	0	0	0	0	0	0	0	0	0	0	0	1	0	0	0	0	0	2
SPAC17G8.14c.1:exon:3-SPAC17G8.14c.1:exon:1	SPAC17G8.14c.1:exon:2	184	1	0	0	0	0	0	0	0	0	0	0	0	0	0	0	0	0	0	0	0	1	1	0	0	0	0	0	0	0	0	0	0	0	0	0	0	0	0	0	0	0	0	0	0	0	0	0
SPAC22H10.03c.1:exon:7-SPAC22H10.03c.1:exon:2	SPAC22H10.03c.1:exon:6;SPAC22H10.03c.1:exon:5;SPAC22H10.03c.1:exon:4;SPAC22H10.03c.1:exon:3	2682	4	0	0	0	0	0	0	0	0	0	0	0	0	0	0	0	0	0	0	0	0	0	0	0	0	0	0	0	0	0	0	0	0	0	0	0	0	0	0	0	0	0	0	0	0	0	0
SPAC22H10.03c.1:exon:6-SPAC22H10.03c.1:exon:4	SPAC22H10.03c.1:exon:5	170	1	0	0	0	0	0	0	0	0	0	0	0	0	0	0	0	0	1	0	0	0	0	0	0	0	0	0	0	0	0	0	0	0	0	0	0	0	0	0	0	0	0	0	0	0	0	0
SPAC22H10.03c.1:exon:5-SPAC22H10.03c.1:exon:3	SPAC22H10.03c.1:exon:4	119	1	1	0	0	0	0	0	0	0	0	0	0	0	0	0	0	0	0	0	0	0	0	0	0	0	0	0	0	0	0	0	0	0	0	0	0	0	0	0	0	0	0	0	0	0	0	1
SPAC25H1.10c.1:exon:3-SPAC25H1.10c.1:exon:1	SPAC25H1.10c.1:exon:2	137	1	0	0	0	0	0	0	0	0	0	0	0	0	0	0	0	0	0	0	0	0	0	0	1	0	0	0	0	0	0	0	0	0	0	0	0	0	0	0	0	1	0	0	0	0	0	0
SPAC4A8.08c.1:exon:4-SPAC4A8.08c.1:exon:1	SPAC4A8.08c.1:exon:3;SPAC4A8.08c.1:exon:2	2100	2	0	0	0	0	0	0	0	0	0	0	0	0	0	0	0	0	0	0	0	0	0	0	0	0	0	0	0	0	0	0	0	0	0	0	0	0	0	0	0	0	0	0	0	0	0	0
SPAC823.14.1:exon:1-SPAC823.14.1:exon:3	SPAC823.14.1:exon:2	39	1	0	2	0	0	0	0	0	0	0	1	0	1	1	0	0	1	1	0	0	0	0	0	1	3	0	0	2	0	4	0	0	1	0	1	0	0	0	0	1	4	3	0	0	1	1	1
SPAC823.14.1:exon:2-SPAC823.14.1:exon:4	SPAC823.14.1:exon:3	73	1	0	0	0	0	0	0	0	0	0	0	0	0	0	0	0	1	0	0	0	0	0	0	0	0	0	0	0	0	0	0	0	0	0	0	0	0	0	0	0	0	0	0	0	0	0	0
SPAC6F6.07c.1:exon:4-SPAC6F6.07c.1:exon:2	SPAC6F6.07c.1:exon:3	33	1	0	2	1	0	2	0	0	1	0	2	2	0	3	0	1	3	2	0	0	3	5	2	0	0	0	0	0	1	0	0	0	0	0	0	0	0	0	3	2	6	3	0	0	0	1	1
SPAC6F6.07c.1:exon:4-SPAC6F6.07c.1:exon:1	SPAC6F6.07c.1:exon:3;SPAC6F6.07c.1:exon:2	80	2	0	1	1	0	0	0	0	0	0	0	0	1	0	0	0	0	0	0	4	0	2	0	0	0	0	0	0	0	0	0	0	0	1	0	0	0	0	0	0	0	2	0	0	0	0	1
SPAC6F6.16c.1:exon:5-SPAC6F6.16c.1:exon:3	SPAC6F6.16c.1:exon:4	251	1	0	0	0	0	0	0	0	0	0	0	0	0	0	0	0	0	0	0	0	0	1	0	0	0	0	0	0	0	0	0	0	0	0	0	0	0	0	0	0	0	0	0	0	0	0	0
SPAC6F6.16c.1:exon:4-SPAC6F6.16c.1:exon:1	SPAC6F6.16c.1:exon:3;SPAC6F6.16c.1:exon:2	177	2	0	0	0	0	0	0	0	0	0	0	1	0	0	0	0	1	0	0	0	0	0	0	0	0	0	0	1	0	0	0	0	0	0	0	0	0	0	0	0	0	0	0	0	0	0	0
SPAC1805.05.1:exon:1-SPAC1805.05.1:exon:3	SPAC1805.05.1:exon:2	70	1	0	0	0	0	0	0	0	0	0	0	0	0	0	0	0	0	0	1	3	0	0	0	0	0	0	1	0	0	0	0	0	0	0	0	0	0	0	0	0	2	0	0	0	1	0	0
SPAC1805.08.1:exon:1-SPAC1805.08.1:exon:3	SPAC1805.08.1:exon:2	111	1	0	1	0	0	0	0	0	0	0	0	0	0	0	0	0	0	0	0	0	0	0	0	0	0	0	0	0	0	0	0	0	0	0	0	0	0	0	0	0	1	0	0	0	0	0	0
SPAC24C9.16c.1:exon:3-SPAC24C9.16c.1:exon:1	SPAC24C9.16c.1:exon:2	38	1	1	0	2	0	0	0	0	0	0	0	0	1	1	0	3	0	0	0	0	0	0	0	0	0	0	0	0	0	1	0	1	0	0	0	0	0	0	3	0	4	7	0	0	0	0	0
SPAC589.05c.1:exon:3-SPAC589.05c.1:exon:1	SPAC589.05c.1:exon:2	149	1	0	0	0	0	0	0	0	0	0	0	0	0	0	0	0	0	0	0	0	1	0	0	0	0	0	0	0	0	0	0	0	0	0	0	0	0	0	0	0	0	0	0	0	0	0	0
SPAC3G9.13c.1:exon:1-SPAC3G9.13c.1:exon:3	SPAC3G9.13c.1:exon:2	81	1	0	0	2	0	0	0	0	0	0	0	0	2	0	0	0	0	0	0	0	1	2	0	0	0	0	0	0	0	0	0	2	0	0	0	0	0	0	0	0	0	1	1	0	1	0	0
SPAC3G9.12.1:exon:3-SPAC3G9.12.1:exon:1	SPAC3G9.12.1:exon:2	68	1	0	0	0	0	0	0	0	0	0	0	0	0	0	0	0	0	0	0	0	0	0	0	0	0	0	0	0	0	0	0	0	0	0	0	0	0	0	0	0	0	0	0	0	0	0	0
SPAC3G9.17.1:exon:3-SPAC3G9.17.1:exon:1	SPAC3G9.17.1:exon:2	89	1	0	1	1	0	0	0	0	0	0	1	0	0	0	0	0	1	2	0	0	0	0	0	0	0	0	0	0	0	0	0	0	0	0	0	0	0	0	1	1	3	0	0	0	0	0	0
SPAC26A3.14c.1:exon:3-SPAC26A3.14c.1:exon:1	SPAC26A3.14c.1:exon:2	89	1	1	1	0	0	0	0	0	0	15	0	0	1	5	0	0	0	1	6	1	0	0	1	0	0	0	3	6	0	1	1	1	5	1	7	11	1	5	0	1	0	1	0	0	21	1	1
SPAC8E11.04c.1:exon:2-SPAC8E11.04c.1:exon:4	SPAC8E11.04c.1:exon:3	48	1	0	0	0	0	0	0	0	0	0	0	0	0	0	3	0	0	0	0	0	0	0	0	0	0	1	0	0	0	0	0	0	0	0	0	0	0	0	1	1	0	1	0	0	0	0	0
SPAC3A11.13.1:exon:4-SPAC3A11.13.1:exon:2	SPAC3A11.13.1:exon:3	71	1	0	0	0	0	0	0	0	0	0	1	0	0	0	0	0	0	0	0	0	0	0	0	0	0	0	0	0	0	0	0	0	0	0	0	0	0	0	1	0	3	0	0	0	0	0	3
SPAC3A11.06.1:exon:8-SPAC3A11.06.1:exon:6	SPAC3A11.06.1:exon:7	53	1	0	0	0	0	0	0	0	0	0	0	0	0	0	0	0	0	0	0	0	0	0	0	0	0	0	0	0	0	0	0	0	1	0	0	0	0	0	0	0	0	0	0	1	0	0	0
SPAC16E8.14c.1:exon:5-SPAC16E8.14c.1:exon:3	SPAC16E8.14c.1:exon:4	61	1	0	0	0	0	0	0	0	0	0	0	0	0	0	0	0	0	0	0	0	1	1	1	0	4	0	0	0	0	0	0	0	0	0	0	0	0	0	0	0	0	0	0	0	0	0	0
SPAC16E8.14c.1:exon:4-SPAC16E8.14c.1:exon:2	SPAC16E8.14c.1:exon:3	268	1	0	0	0	0	0	0	0	0	0	0	0	0	0	0	0	0	0	0	0	0	0	0	0	0	0	0	0	0	0	0	0	0	0	0	0	0	0	0	0	0	0	0	0	0	0	0
SPAC16E8.14c.1:exon:4-SPAC16E8.14c.1:exon:1	SPAC16E8.14c.1:exon:3;SPAC16E8.14c.1:exon:2	378	2	0	0	1	0	0	0	0	0	0	0	0	0	0	0	0	0	0	0	0	0	0	0	0	0	0	0	0	0	0	0	0	0	0	0	0	0	0	0	0	0	0	0	0	0	0	0
SPAC1B1.04c.1:exon:8-SPAC1B1.04c.1:exon:6	SPAC1B1.04c.1:exon:7	101	1	1	0	0	0	0	0	0	0	14	4	2	0	3	2	6	1	1	3	2	0	0	0	0	9	11	1	2	6	3	6	3	0	6	7	3	4	2	6	4	5	4	0	0	0	0	0
SPAC17A2.08c.1:exon:3-SPAC17A2.08c.1:exon:1	SPAC17A2.08c.1:exon:2	86	1	0	1	0	0	0	0	1	0	0	0	0	0	0	0	0	1	1	0	0	0	0	0	0	0	0	0	0	0	0	0	0	0	0	0	0	0	0	0	0	1	1	0	0	0	0	0
SPAC8C9.11.1:exon:1-SPAC8C9.11.1:exon:3	SPAC8C9.11.1:exon:2	150	1	0	0	0	0	0	0	0	0	0	1	0	1	0	0	0	0	0	0	0	0	0	0	0	0	0	0	0	0	0	0	0	0	0	1	1	0	0	0	2	2	1	0	0	0	0	0
SPAC15A10.15.1:exon:1-SPAC15A10.15.1:exon:3	SPAC15A10.15.1:exon:2	40	1	0	0	1	0	0	0	0	1	0	0	1	0	0	0	0	0	0	0	0	0	0	0	0	0	0	0	0	0	0	0	1	0	0	0	0	0	0	0	0	0	1	0	0	0	0	0
SPAC1F12.10c.1:exon:3-SPAC1F12.10c.1:exon:1	SPAC1F12.10c.1:exon:2	178	1	0	0	0	0	0	0	0	0	0	0	0	0	0	0	0	0	0	0	0	0	0	0	0	0	0	0	0	0	0	0	0	0	0	0	0	0	0	0	0	2	0	0	0	0	0	0
SPAC1071.02.1:exon:2-SPAC1071.02.1:exon:4	SPAC1071.02.1:exon:3	104	1	0	0	0	0	0	0	0	0	0	1	0	0	0	0	0	0	0	0	0	0	0	0	0	0	0	0	0	0	0	0	0	0	0	0	0	0	0	0	0	0	0	0	0	0	0	0
SPAC19G12.07c.1:exon:3-SPAC19G12.07c.1:exon:1	SPAC19G12.07c.1:exon:2	75	1	0	0	0	0	0	0	0	0	0	0	0	0	0	1	0	0	0	0	0	0	0	0	0	0	0	0	0	0	0	0	0	0	0	0	0	0	0	1	1	0	0	0	0	0	0	1
SPAC2C4.09.1:exon:1-SPAC2C4.09.1:exon:3	SPAC2C4.09.1:exon:2	387	1	0	0	0	0	0	0	0	0	0	0	0	0	0	0	0	0	0	0	0	0	0	0	0	0	0	0	0	0	0	0	0	0	0	0	0	0	0	0	0	0	0	0	0	0	0	0
SPAC29E6.01.1:exon:1-SPAC29E6.01.1:exon:3	SPAC29E6.01.1:exon:2	95	1	0	1	1	1	0	0	0	0	0	0	0	0	1	1	1	0	0	0	0	0	0	0	0	0	1	1	0	0	1	1	0	0	0	0	1	0	4	1	1	1	1	0	2	1	1	0
SPAC16.02c.1:exon:10-SPAC16.02c.1:exon:6	SPAC16.02c.1:exon:9;SPAC16.02c.1:exon:8;SPAC16.02c.1:exon:7	129	3	0	0	0	0	0	0	0	0	0	0	0	0	0	0	0	0	0	0	0	0	0	0	0	0	0	0	0	0	0	0	0	0	0	0	0	0	0	0	0	0	0	0	0	0	0	0
SPAC16.02c.1:exon:10-SPAC16.02c.1:exon:1	SPAC16.02c.1:exon:9;SPAC16.02c.1:exon:8;SPAC16.02c.1:exon:7;SPAC16.02c.1:exon:6;SPAC16.02c.1:exon:5;SPAC16.02c.1:exon:4;SPAC16.02c.1:exon:3;SPAC16.02c.1:exon:2	467	8	0	1	0	0	0	0	0	0	0	1	1	0	0	0	0	0	4	0	0	0	0	0	0	0	0	0	0	0	0	0	0	0	0	0	0	0	0	0	1	0	0	0	0	0	1	1
SPAC16.02c.1:exon:9-SPAC16.02c.1:exon:6	SPAC16.02c.1:exon:8;SPAC16.02c.1:exon:7	43	2	0	0	0	0	0	0	0	0	0	0	0	0	0	0	0	0	0	0	0	0	0	0	0	0	0	0	0	0	0	0	0	0	0	0	0	0	0	0	0	0	1	0	0	0	0	0
SPAC16.02c.1:exon:6-SPAC16.02c.1:exon:4	SPAC16.02c.1:exon:5	69	1	0	0	0	0	0	0	0	0	0	0	0	0	0	0	0	0	0	0	0	0	0	0	0	0	0	0	0	0	0	0	0	0	0	0	0	0	0	1	0	1	0	0	0	0	0	0
SPAC16.02c.1:exon:4-SPAC16.02c.1:exon:2	SPAC16.02c.1:exon:3	74	1	1	0	0	0	0	0	0	0	0	0	1	0	0	0	0	0	0	0	0	0	0	1	0	0	0	0	0	0	0	0	0	0	0	0	0	0	0	0	0	0	0	0	0	0	0	0
SPAC16.02c.1:exon:4-SPAC16.02c.1:exon:1	SPAC16.02c.1:exon:3;SPAC16.02c.1:exon:2	174	2	0	0	0	0	0	0	0	0	0	0	0	0	0	0	0	0	0	0	0	0	0	0	0	0	0	0	0	0	0	0	0	0	0	0	0	0	0	0	0	0	1	0	0	0	1	0
SPAC27D7.08c.1:exon:3-SPAC27D7.08c.1:exon:1	SPAC27D7.08c.1:exon:2	90	1	4	4	0	0	0	0	1	0	0	1	3	4	2	3	0	1	4	0	1	0	0	2	1	0	0	0	4	2	2	1	0	0	0	0	0	0	1	4	1	4	7	8	3	0	3	4
SPAC637.05c.1:exon:5-SPAC637.05c.1:exon:3	SPAC637.05c.1:exon:4	72	1	0	0	0	0	0	0	0	0	0	0	0	0	0	0	0	0	0	0	0	2	0	0	0	0	0	0	0	0	0	0	0	0	0	0	1	0	0	0	0	0	0	0	0	1	0	0
SPAC30C2.05.1:exon:1-SPAC30C2.05.1:exon:3	SPAC30C2.05.1:exon:2	52	1	1	1	0	0	0	0	0	1	3	0	1	0	2	7	1	0	1	2	0	0	0	0	0	2	1	0	1	3	4	0	1	0	0	1	2	0	0	0	0	2	3	0	0	2	0	0
SPAC17D4.04.1:exon:1-SPAC17D4.04.1:exon:3	SPAC17D4.04.1:exon:2	47	1	0	0	0	0	0	0	0	0	0	0	0	1	0	0	0	0	0	0	0	0	0	0	0	0	0	0	0	0	0	0	0	0	0	0	0	0	0	0	0	0	0	0	0	0	0	0
SPAC17D4.04.1:exon:1-SPAC17D4.04.1:exon:5	SPAC17D4.04.1:exon:2;SPAC17D4.04.1:exon:3;SPAC17D4.04.1:exon:4	1976	3	0	0	0	0	0	0	0	0	0	0	0	0	0	0	0	1	0	0	0	0	0	0	0	0	0	0	0	0	0	0	0	0	0	0	0	0	0	0	0	0	0	0	0	0	0	0
SPAC458.06.1:exon:2-SPAC458.06.1:exon:4	SPAC458.06.1:exon:3	89	1	1	0	1	0	0	0	0	0	0	2	2	0	0	0	0	0	0	1	0	0	0	0	0	0	0	0	0	0	0	0	0	0	0	0	0	0	0	0	0	1	0	0	0	0	0	0
SPAPYUG7.04c.1:exon:3-SPAPYUG7.04c.1:exon:1	SPAPYUG7.04c.1:exon:2	133	1	1	0	0	0	0	0	0	0	1	0	0	0	3	0	0	0	1	2	0	0	0	0	0	2	0	0	0	0	0	0	0	0	0	0	1	0	0	3	0	0	1	0	0	0	0	0
SPAC1782.07.1:exon:1-SPAC1782.07.1:exon:3	SPAC1782.07.1:exon:2	18	1	1	1	0	0	0	0	1	0	0	1	3	0	0	0	0	0	2	0	0	0	0	1	0	0	0	1	0	1	0	0	0	0	1	0	0	0	0	2	1	4	4	1	0	0	5	2
SPAC22F8.07c.1:exon:6-SPAC22F8.07c.1:exon:4	SPAC22F8.07c.1:exon:5	88	1	2	0	0	0	0	0	0	0	1	0	2	0	10	8	0	1	0	4	4	0	0	0	0	2	1	2	5	1	0	6	0	2	0	0	4	0	0	0	0	1	0	0	0	0	1	0
SPAC19B12.05c.1:exon:6-SPAC19B12.05c.1:exon:4	SPAC19B12.05c.1:exon:5	87	1	0	0	0	0	0	0	0	0	0	0	1	1	0	0	0	0	0	0	0	0	0	0	0	0	0	0	0	0	0	0	0	0	0	0	0	0	0	0	0	0	0	0	0	0	0	0
SPAC19B12.05c.1:exon:5-SPAC19B12.05c.1:exon:3	SPAC19B12.05c.1:exon:4	85	1	1	0	0	0	0	0	0	0	0	0	0	0	0	0	0	0	1	0	0	0	0	0	0	0	0	0	0	0	0	0	0	0	0	0	0	0	0	0	0	0	0	0	0	0	0	0
SPAC19B12.06c.1:exon:3-SPAC19B12.06c.1:exon:1	SPAC19B12.06c.1:exon:2	66	1	0	1	0	0	0	0	0	0	0	2	2	1	0	0	0	1	2	0	0	0	0	0	2	0	0	0	0	0	0	0	0	0	0	0	0	0	0	2	1	2	3	0	0	0	0	0
SPAC890.03.1:exon:1-SPAC890.03.1:exon:3	SPAC890.03.1:exon:2	94	1	0	0	0	0	0	0	0	0	0	0	0	0	0	0	0	0	0	0	0	0	0	0	0	0	0	0	0	0	0	0	0	0	0	0	0	0	0	0	0	1	0	0	0	0	0	0
SPAC890.07c.1:exon:9-SPAC890.07c.1:exon:6	SPAC890.07c.1:exon:8;SPAC890.07c.1:exon:7	17	2	0	0	0	0	0	0	0	0	0	0	0	0	0	0	0	0	0	0	0	0	0	0	0	0	0	0	0	0	0	0	0	0	0	0	0	0	0	0	0	0	0	0	0	0	0	0
SPAC890.07c.1:exon:9-SPAC890.07c.1:exon:5	SPAC890.07c.1:exon:8;SPAC890.07c.1:exon:7;SPAC890.07c.1:exon:6	132	3	0	0	0	0	0	0	0	0	0	0	0	0	0	0	0	0	0	0	0	0	0	0	0	0	0	0	0	0	0	0	0	0	0	0	0	0	0	0	0	0	0	0	0	0	0	0
SPAP8A3.08.1:exon:1-SPAP8A3.08.1:exon:5	SPAP8A3.08.1:exon:2;SPAP8A3.08.1:exon:3;SPAP8A3.08.1:exon:4	366	3	0	0	0	0	0	0	0	0	0	0	0	0	0	0	0	0	0	4	1	0	0	0	0	1	1	10	5	1	1	5	8	1	3	8	7	0	8	0	0	1	1	0	0	0	1	0
SPAP8A3.08.1:exon:2-SPAP8A3.08.1:exon:4	SPAP8A3.08.1:exon:3	141	1	0	0	0	0	0	0	0	0	0	0	0	1	0	0	0	0	0	0	0	0	0	0	0	0	0	0	0	0	0	0	0	0	0	0	0	0	0	0	0	0	0	0	0	0	0	0
SPAP8A3.08.1:exon:3-SPAP8A3.08.1:exon:5	SPAP8A3.08.1:exon:4	93	1	0	0	0	0	0	0	0	0	0	0	0	0	0	0	0	0	0	0	1	0	0	0	0	0	3	0	0	0	0	0	0	0	0	0	0	0	0	0	2	1	0	0	0	0	0	0
SPAP8A3.09c.1:exon:6-SPAP8A3.09c.1:exon:4	SPAP8A3.09c.1:exon:5	106	1	1	0	0	0	0	0	0	0	0	0	0	0	0	0	0	0	1	0	0	0	0	0	0	0	0	0	0	0	0	0	0	0	0	0	0	0	0	0	0	0	0	0	0	0	0	0
SPAP8A3.09c.1:exon:4-SPAP8A3.09c.1:exon:1	SPAP8A3.09c.1:exon:3;SPAP8A3.09c.1:exon:2	439	2	0	0	0	0	0	0	0	0	0	0	0	0	0	0	0	0	0	0	0	0	0	0	0	0	0	0	0	0	0	0	0	0	0	0	0	0	0	0	0	0	0	0	0	0	0	0
SPAC4D7.10c.1:exon:1-SPAC4D7.10c.1:three_prime_UTR:1	SPAC4D7.10c.1:three_prime_UTR:2	55	1	0	0	0	0	0	0	0	0	0	0	0	0	0	0	0	0	0	0	0	0	0	0	0	0	0	0	0	0	0	0	0	0	0	0	0	0	0	0	0	0	0	0	0	0	0	0
SPAC3G6.03c.1:exon:4-SPAC3G6.03c.1:exon:2	SPAC3G6.03c.1:exon:3	129	1	1	0	0	0	0	0	0	0	0	0	0	0	0	0	0	0	2	0	0	1	0	0	0	0	0	0	0	0	0	0	0	0	1	0	2	0	2	1	0	1	0	1	0	0	1	0
SPAC1039.05c.1:exon:4-SPAC1039.05c.1:exon:1	SPAC1039.05c.1:exon:3;SPAC1039.05c.1:exon:2	932	2	0	0	0	0	0	0	0	0	0	0	0	0	0	0	0	0	0	0	0	0	0	0	0	0	0	0	0	0	0	0	0	0	0	0	0	0	0	0	0	0	0	0	0	0	0	0
SPAC1039.05c.1:exon:3-SPAC1039.05c.1:exon:1	SPAC1039.05c.1:exon:2	633	1	0	0	0	0	0	0	0	0	0	0	0	0	0	0	0	0	0	0	0	0	0	0	0	0	0	0	0	0	0	0	0	0	0	0	0	0	0	0	0	0	0	0	0	0	0	0
SPAC1639.02c.1:exon:10-SPAC1639.02c.1:exon:5	SPAC1639.02c.1:exon:9;SPAC1639.02c.1:exon:8;SPAC1639.02c.1:exon:7;SPAC1639.02c.1:exon:6	252	4	0	2	0	0	1	0	0	0	0	2	1	1	2	4	0	2	0	0	0	0	1	0	0	0	1	3	0	1	0	1	1	3	1	0	0	0	0	2	1	1	0	0	0	1	2	0
SPAC1639.02c.1:exon:6-SPAC1639.02c.1:exon:4	SPAC1639.02c.1:exon:5	67	1	0	0	0	0	0	0	0	0	1	0	0	0	0	1	0	3	1	0	0	0	0	0	1	0	0	0	0	0	0	0	0	0	0	0	0	0	2	1	1	0	2	0	0	0	0	0
SPAC1639.02c.1:exon:5-SPAC1639.02c.1:exon:3	SPAC1639.02c.1:exon:4	71	1	0	0	0	0	0	0	0	0	0	0	0	0	0	0	0	0	0	0	0	0	0	0	0	0	0	0	0	0	0	0	0	0	0	0	0	0	0	0	0	0	0	0	0	0	0	0
SPAC1639.02c.1:exon:3-SPAC1639.02c.1:exon:1	SPAC1639.02c.1:exon:2	26	1	0	0	0	0	0	1	0	0	0	1	2	0	0	0	0	1	1	0	0	0	0	0	0	0	0	0	0	1	1	0	0	0	0	0	0	0	0	2	1	0	0	0	0	0	1	1
SPAC18B11.04.1:exon:4-SPAC18B11.04.1:exon:2	SPAC18B11.04.1:exon:3	33	1	0	0	0	0	0	0	0	0	0	1	0	0	0	1	0	0	0	0	0	0	1	0	0	0	0	0	0	0	0	0	0	0	0	0	0	0	0	0	0	0	0	0	0	0	0	0
SPAC12G12.02.1:exon:4-SPAC12G12.02.1:exon:2	SPAC12G12.02.1:exon:3	133	1	1	0	0	0	0	0	0	0	0	1	0	0	0	1	1	0	2	0	2	0	0	0	0	0	0	0	0	0	0	0	1	0	0	0	0	0	0	1	0	1	0	0	0	0	0	0
SPAC12G12.02.1:exon:4-SPAC12G12.02.1:exon:1	SPAC12G12.02.1:exon:3;SPAC12G12.02.1:exon:2	264	2	0	0	0	0	0	0	0	0	0	5	0	0	0	0	1	1	1	1	0	0	0	0	0	1	0	0	0	0	0	6	0	0	0	2	0	0	0	1	3	2	1	0	0	0	0	0
SPAC630.06c.1:exon:3-SPAC630.06c.1:exon:1	SPAC630.06c.1:exon:2	82	1	0	0	0	0	0	0	0	0	0	0	0	0	0	0	0	0	0	0	0	0	1	0	0	0	0	0	0	0	0	0	0	0	0	0	0	0	0	0	0	0	1	0	0	0	0	0
SPAC630.11.1:exon:1-SPAC630.11.1:exon:3	SPAC630.11.1:exon:2	19	1	0	0	0	0	0	0	0	0	5	0	0	0	1	2	0	0	0	0	1	0	0	0	0	0	2	1	2	2	0	1	0	0	1	3	0	3	0	1	0	2	2	0	0	2	0	0
SPAC630.11.1:exon:1-SPAC630.11.1:exon:4	SPAC630.11.1:exon:2;SPAC630.11.1:exon:3	92	2	1	1	0	0	1	0	0	1	12	2	0	0	3	2	0	0	0	0	0	1	0	0	0	0	3	0	6	0	1	4	2	0	0	2	0	0	0	4	3	3	2	0	0	2	0	0
SPAC630.11.1:exon:2-SPAC630.11.1:exon:4	SPAC630.11.1:exon:3	73	1	0	0	0	0	0	0	0	0	0	0	0	0	0	0	0	1	0	0	0	1	0	0	0	0	0	0	0	0	0	0	0	0	0	0	0	0	0	0	0	0	1	0	0	0	0	0
SPAC1751.04.1:exon:2-SPAC1751.04.1:exon:4	SPAC1751.04.1:exon:3	75	1	0	0	0	0	0	0	0	0	0	0	0	0	0	0	0	0	0	0	0	0	0	0	0	0	0	0	0	0	0	0	0	0	0	0	0	0	0	0	0	0	0	0	0	0	0	0
SPAC31A2.02.1:exon:1-SPAC31A2.02.1:exon:3	SPAC31A2.02.1:exon:2	170	1	0	0	1	0	0	0	0	0	0	0	0	0	1	0	0	0	0	0	0	0	0	0	0	0	2	0	0	0	0	3	1	0	0	0	0	0	0	0	0	0	0	0	0	0	0	0
SPAC31A2.02.1:exon:1-SPAC31A2.02.1:exon:4	SPAC31A2.02.1:exon:2;SPAC31A2.02.1:exon:3	263	2	0	0	0	0	0	0	0	0	0	0	0	0	0	0	0	0	0	0	0	1	0	0	0	0	0	0	0	0	0	0	0	0	0	0	0	0	0	0	0	1	0	0	0	0	0	0
SPAC24H6.03.1:exon:4-SPAC24H6.03.1:exon:2	SPAC24H6.03.1:exon:3	174	1	0	0	0	0	0	0	0	0	0	0	0	0	0	0	1	0	0	0	0	0	0	0	0	0	0	0	0	0	0	0	0	0	0	0	0	0	0	0	0	0	0	0	0	0	0	0
SPAC227.07c.1:exon:4-SPAC227.07c.1:exon:2	SPAC227.07c.1:exon:3	41	1	0	0	0	0	0	0	0	0	0	0	0	0	0	0	0	0	0	0	0	0	0	0	0	0	0	0	0	0	0	0	0	0	0	0	0	0	0	0	0	0	1	0	0	0	0	0
SPAC1F3.03.1:exon:2-SPAC1F3.03.1:exon:4	SPAC1F3.03.1:exon:3	1906	1	0	0	0	0	0	0	0	0	0	0	0	0	0	0	0	0	0	0	0	0	0	0	0	0	0	0	0	0	0	0	0	0	0	0	0	0	0	0	0	0	0	0	0	0	0	1
SPAC1296.04.1:exon:2-SPAC1296.04.1:exon:4	SPAC1296.04.1:exon:3	153	1	0	0	0	0	0	0	0	0	0	0	0	1	0	0	0	0	0	0	0	0	0	0	0	0	0	0	1	0	0	1	0	0	0	0	2	0	0	1	0	1	1	0	0	0	0	0
SPAC1296.06.1:exon:1-SPAC1296.06.1:exon:3	SPAC1296.06.1:exon:2	78	1	0	0	0	0	0	0	0	0	0	0	0	0	0	0	0	2	0	0	0	0	0	0	0	0	0	0	0	0	0	0	0	0	0	0	0	0	0	0	0	0	1	0	0	0	1	0
SPAC22H12.02.1:exon:1-SPAC22H12.02.1:exon:3	SPAC22H12.02.1:exon:2	169	1	0	0	0	0	0	0	0	0	0	0	0	0	0	0	0	0	0	0	0	0	0	0	0	0	0	0	0	1	0	0	0	0	0	0	0	0	0	0	0	0	0	0	0	0	0	0
SPAC22H12.02.1:exon:1-SPAC22H12.02.1:exon:4	SPAC22H12.02.1:exon:2;SPAC22H12.02.1:exon:3	321	2	0	0	0	0	0	0	0	0	0	0	0	0	0	0	0	0	0	0	0	0	0	0	0	0	0	0	0	0	0	0	0	0	0	0	0	0	0	1	1	0	0	0	0	0	0	0
SPAC1687.12c.1:exon:3-SPAC1687.12c.1:exon:1	SPAC1687.12c.1:exon:2	355	1	1	0	0	0	0	0	0	0	0	0	1	0	0	0	0	0	0	0	0	0	0	0	0	0	0	0	0	0	0	0	0	0	0	0	0	0	0	1	0	1	0	0	0	0	0	1
SPAC821.06.1:exon:3-SPAC821.06.1:exon:5	SPAC821.06.1:exon:4	82	1	0	1	1	0	0	0	0	0	0	4	1	0	0	0	0	0	1	0	0	0	0	0	0	0	0	0	0	0	0	0	0	0	0	0	0	0	0	2	1	3	1	0	0	0	1	0
SPAC23C4.11.1:exon:1-SPAC23C4.11.1:exon:3	SPAC23C4.11.1:exon:2	51	1	0	0	0	0	0	0	0	1	0	0	0	1	0	1	0	0	0	1	0	0	0	0	0	0	0	0	3	2	0	0	0	0	0	0	0	0	0	0	0	0	0	0	0	0	0	0
SPAC23C4.15.1:exon:1-SPAC23C4.15.1:exon:3	SPAC23C4.15.1:exon:2	83	1	0	0	2	0	0	0	0	0	0	0	0	0	1	0	0	1	0	0	0	0	2	1	0	0	0	1	0	0	0	0	0	0	0	0	0	0	0	0	0	1	0	0	0	0	0	0
SPAC56F8.11.1:exon:1-SPAC56F8.11.1:exon:3	SPAC56F8.11.1:exon:2	154	1	0	0	0	0	0	0	0	0	0	0	0	0	0	0	0	1	0	0	0	0	0	0	0	0	0	0	0	0	0	0	0	0	0	0	0	0	0	0	0	0	0	0	0	0	0	0
SPAC10F6.05c.1:exon:3-SPAC10F6.05c.1:exon:1	SPAC10F6.05c.1:exon:2	139	1	0	0	0	0	0	0	0	0	0	0	0	0	0	0	0	0	0	0	0	1	0	0	0	0	0	0	0	0	0	0	0	0	0	0	0	0	0	0	0	0	0	0	0	0	0	0
SPAPB17E12.04c.1:exon:4-SPAPB17E12.04c.1:exon:2	SPAPB17E12.04c.1:exon:3	82	1	0	0	0	0	0	0	0	0	0	0	0	0	0	0	0	0	0	0	0	0	0	0	0	0	0	0	0	0	0	0	0	0	0	0	0	0	0	0	0	0	0	0	0	0	0	0
SPAC6F12.08c.1:exon:3-SPAC6F12.08c.1:exon:1	SPAC6F12.08c.1:exon:2	142	1	0	0	0	0	0	0	0	1	0	0	0	0	1	2	0	0	0	1	2	0	0	1	0	5	0	2	4	0	1	5	3	5	4	5	0	0	3	1	1	2	0	0	0	0	0	0
SPAC3A12.04c.1:exon:4-SPAC3A12.04c.1:exon:2	SPAC3A12.04c.1:exon:3	59	1	0	1	0	0	0	0	0	0	1	1	0	3	1	0	0	1	0	0	0	0	0	0	1	1	0	0	3	0	0	0	0	0	3	0	1	0	4	2	1	3	3	0	0	0	1	0
SPAC5D6.04.1:exon:4-SPAC5D6.04.1:exon:2	SPAC5D6.04.1:exon:3	131	1	0	0	0	0	0	0	0	0	0	0	0	0	0	0	0	0	0	0	0	0	0	0	0	0	0	0	0	0	0	0	0	0	0	0	0	0	0	0	0	0	0	0	0	0	0	0
SPAC23H4.14.1:exon:4-SPAC23H4.14.1:exon:2	SPAC23H4.14.1:exon:3	105	1	0	0	0	0	0	0	0	0	0	0	0	0	0	0	0	0	0	0	0	0	0	0	0	0	0	0	0	0	0	0	0	0	0	0	0	0	0	0	0	0	0	0	0	0	0	0
SPAC1002.15c.1:exon:4-SPAC1002.15c.1:exon:2	SPAC1002.15c.1:exon:3	207	1	3	0	0	0	0	0	0	0	0	0	1	0	0	1	0	0	0	0	1	0	0	0	1	0	1	0	0	1	2	2	2	0	0	0	0	0	0	0	2	0	0	0	1	0	2	1
SPAC140.03.1:exon:2-SPAC140.03.1:exon:4	SPAC140.03.1:exon:3	18	1	2	1	1	0	0	0	1	1	0	2	0	0	2	0	0	0	4	2	3	0	0	0	0	2	4	3	1	1	4	2	4	4	1	4	2	2	4	3	1	3	1	0	1	1	0	2
SPAC9G1.13c.1:exon:4-SPAC9G1.13c.1:exon:1	SPAC9G1.13c.1:exon:3;SPAC9G1.13c.1:exon:2	167	2	0	0	2	0	0	0	0	1	1	1	1	0	3	2	1	2	1	0	1	0	0	0	0	2	0	0	0	0	0	0	0	2	0	1	0	1	0	0	1	5	1	0	0	1	2	0
SPAC20H4.05c.1:exon:6-SPAC20H4.05c.1:exon:4	SPAC20H4.05c.1:exon:5	24	1	0	0	1	1	0	0	0	0	1	2	0	2	0	0	0	0	0	0	0	0	1	0	1	0	0	0	0	0	2	0	0	0	3	0	0	0	0	1	0	1	3	0	0	0	0	0
SPAC20H4.05c.1:exon:6-SPAC20H4.05c.1:exon:3	SPAC20H4.05c.1:exon:5;SPAC20H4.05c.1:exon:4	102	2	0	0	0	0	0	0	0	0	0	0	0	0	0	0	0	0	0	0	0	0	0	0	0	0	0	0	0	0	0	0	0	0	0	0	0	0	0	1	1	0	0	0	0	0	0	0
SPAC23C11.08.1:exon:1-SPAC23C11.08.1:exon:4	SPAC23C11.08.1:exon:2;SPAC23C11.08.1:exon:3	189	2	0	0	0	0	0	0	0	0	0	0	0	0	0	0	0	0	0	0	0	1	0	0	0	0	0	0	0	0	0	0	0	0	0	0	0	0	0	0	0	0	0	0	0	0	0	0
SPAC23C11.15.1:exon:1-SPAC23C11.15.1:exon:3	SPAC23C11.15.1:exon:2	181	1	0	0	0	0	0	0	0	0	0	0	0	0	0	0	0	0	0	0	0	0	0	0	0	0	0	0	0	0	0	0	0	0	0	3	0	0	0	1	1	3	4	0	0	0	0	0
SPAC1783.06c.1:exon:3-SPAC1783.06c.1:exon:1	SPAC1783.06c.1:exon:2	137	1	0	0	0	0	0	0	0	0	0	0	0	0	0	0	0	0	0	0	0	0	0	0	0	0	0	0	0	0	0	0	0	0	0	0	0	0	0	0	0	0	0	0	0	0	0	0
SPAC18G6.03.1:exon:1-SPAC18G6.03.1:exon:3	SPAC18G6.03.1:exon:2	81	1	1	0	0	0	0	0	0	0	0	0	0	0	0	1	1	1	0	1	0	0	0	0	2	0	0	0	0	0	0	2	2	0	0	0	0	0	0	1	1	1	0	0	0	1	1	0
SPAC13D6.04c.1:exon:3-SPAC13D6.04c.1:exon:1	SPAC13D6.04c.1:exon:2	92	1	0	0	0	0	0	0	0	0	0	0	0	0	0	0	0	1	0	0	0	0	0	0	0	0	0	0	0	0	0	0	0	0	0	0	0	0	0	0	2	1	0	0	0	0	1	2
SPAC6B12.15.1:exon:1-SPAC6B12.15.1:exon:3	SPAC6B12.15.1:exon:2	399	1	0	0	0	0	0	0	0	0	0	0	0	0	1	0	0	0	0	0	0	0	0	0	0	0	0	0	0	0	0	0	0	0	0	0	0	0	0	0	0	0	0	0	0	0	0	0
SPAC644.11c.1:exon:4-SPAC644.11c.1:exon:2	SPAC644.11c.1:exon:3	167	1	0	0	0	0	0	0	0	0	0	0	0	0	0	0	0	0	0	0	0	0	0	0	0	0	0	0	0	0	0	0	0	0	0	0	0	0	0	0	0	0	0	0	0	1	0	0
SPAC644.18c.1:exon:3-SPAC644.18c.1:exon:1	SPAC644.18c.1:exon:2	286	1	1	2	0	0	1	1	0	0	0	2	0	0	0	0	0	0	0	0	0	0	0	0	0	0	0	0	0	0	0	0	0	0	0	0	0	0	0	1	0	0	1	0	0	0	0	0
SPAPB2B4.06.1:exon:2-SPAPB2B4.06.1:exon:4	SPAPB2B4.06.1:exon:3	211	1	0	0	0	0	0	0	0	0	0	0	0	0	0	0	0	0	0	0	0	0	0	0	0	0	0	0	0	0	0	0	0	0	0	0	0	0	0	0	0	0	0	0	0	0	0	0
SPAC6F6.15.1:exon:1-SPAC6F6.15.1:exon:3	SPAC6F6.15.1:exon:2	40	1	0	0	0	0	0	0	0	0	0	0	0	1	0	0	0	0	0	0	0	0	0	0	0	0	0	0	0	0	0	0	1	0	0	0	0	0	0	0	0	0	0	0	2	0	0	0
SPAC6F6.15.1:exon:3-SPAC6F6.15.1:exon:7	SPAC6F6.15.1:exon:4;SPAC6F6.15.1:exon:5;SPAC6F6.15.1:exon:6	155	3	0	0	0	0	0	0	0	0	0	0	0	0	0	0	0	0	0	0	0	0	0	0	0	0	0	0	0	0	0	0	0	0	0	0	0	0	0	0	0	0	0	0	0	0	0	0
SPAC6F6.15.1:exon:4-SPAC6F6.15.1:exon:6	SPAC6F6.15.1:exon:5	47	1	0	0	1	0	0	0	0	0	0	0	0	1	0	0	1	0	0	0	0	3	0	0	0	0	0	0	0	0	0	0	0	0	0	0	0	0	0	0	0	0	0	0	0	0	0	0
SPAC6F6.15.1:exon:5-SPAC6F6.15.1:exon:7	SPAC6F6.15.1:exon:6	47	1	0	0	0	0	0	0	0	0	0	0	1	0	0	0	0	0	0	0	1	0	1	0	0	0	0	0	0	0	0	0	0	0	0	0	1	0	0	1	1	0	0	0	0	0	0	0
SPAC8F11.02c.1:exon:3-SPAC8F11.02c.1:exon:1	SPAC8F11.02c.1:exon:2	62	1	0	0	0	0	0	0	0	0	1	0	0	0	0	2	0	0	0	0	0	0	0	1	0	0	1	0	0	0	1	0	0	0	0	0	0	0	0	0	0	0	0	0	0	0	0	0
SPAC31G5.12c.1:exon:3-SPAC31G5.12c.1:exon:1	SPAC31G5.12c.1:exon:2	99	1	0	2	0	0	0	0	0	0	4	0	0	0	1	1	0	0	1	0	0	0	0	0	0	0	0	0	0	0	0	0	3	1	1	1	1	0	1	0	0	0	0	1	0	8	0	0
SPAC1786.01c.1:exon:3-SPAC1786.01c.1:exon:1	SPAC1786.01c.1:exon:2	1336	1	0	0	0	0	0	0	0	0	0	0	0	0	0	0	0	0	0	0	0	0	0	0	0	0	0	0	0	0	0	0	0	0	0	0	0	0	0	0	0	0	0	0	0	0	0	0
SPAC589.07c.1:exon:4-SPAC589.07c.1:exon:1	SPAC589.07c.1:exon:3;SPAC589.07c.1:exon:2	881	2	0	1	0	0	0	0	0	0	0	0	0	0	0	0	0	0	0	0	0	1	0	0	0	0	0	0	0	0	0	0	0	0	0	0	0	0	0	0	0	0	0	0	0	0	0	2
SPAC688.14.1:exon:1-SPAC688.14.1:exon:3	SPAC688.14.1:exon:2	678	1	0	0	0	0	0	0	0	0	0	0	0	0	0	0	0	0	0	0	0	0	0	0	0	0	0	0	0	0	0	0	0	2	0	0	0	0	0	0	0	0	0	0	0	0	0	0
SPAC6G9.16c.1:exon:4-SPAC6G9.16c.1:exon:2	SPAC6G9.16c.1:exon:3	137	1	0	0	0	0	0	0	0	0	0	0	0	0	0	0	0	0	0	0	0	0	0	0	0	0	0	0	0	0	0	0	0	0	0	0	0	0	0	0	0	0	0	0	0	0	0	0
SPAC26A3.06.1:exon:1-SPAC26A3.06.1:exon:3	SPAC26A3.06.1:exon:2	38	1	0	0	1	0	0	0	0	0	1	0	0	1	0	0	0	1	0	1	0	0	0	0	0	0	0	1	0	0	0	0	0	0	0	2	4	0	0	1	0	2	1	0	0	0	0	0
SPAC959.02.1:exon:1-SPAC959.02.1:exon:3	SPAC959.02.1:exon:2	118	1	0	0	0	0	0	0	0	0	0	0	0	0	0	0	0	0	0	0	0	0	0	0	0	0	0	0	0	0	0	0	0	0	0	0	0	0	0	0	0	0	0	0	0	0	0	0
SPAC3A11.03.1:exon:1-SPAC3A11.03.1:three_prime_UTR:2	SPAC3A11.03.1:exon:2	378	1	0	0	0	0	0	0	0	1	0	0	1	0	0	0	0	0	1	0	0	0	0	0	0	0	0	0	0	0	0	0	0	0	0	0	0	0	0	0	0	1	2	0	0	0	1	0
SPAC16E8.11c.1:exon:6-SPAC16E8.11c.1:exon:4	SPAC16E8.11c.1:exon:5	87	1	0	0	0	1	0	0	0	0	0	0	0	2	0	0	0	0	0	0	0	0	0	0	0	0	0	1	1	0	0	5	0	0	0	0	0	5	0	0	0	1	0	0	0	0	1	1
SPAC17G6.12.1:exon:1-SPAC17G6.12.1:exon:3	SPAC17G6.12.1:exon:2	87	1	0	0	0	0	0	0	0	0	0	0	0	0	0	0	0	1	0	0	0	0	0	0	0	0	0	0	0	0	0	0	0	0	0	0	0	0	0	0	1	1	0	0	0	0	0	1
SPAC8C9.05.1:exon:1-SPAC8C9.05.1:exon:3	SPAC8C9.05.1:exon:2	34	1	0	0	1	0	0	0	0	0	0	0	0	0	1	0	0	0	0	0	0	0	0	0	0	0	3	0	1	0	0	0	0	0	2	0	0	0	1	0	0	0	0	0	0	1	0	0
SPAC8C9.05.1:exon:1-SPAC8C9.05.1:exon:4	SPAC8C9.05.1:exon:2;SPAC8C9.05.1:exon:3	63	2	0	0	1	0	0	0	0	2	0	0	0	2	1	0	0	1	0	1	0	0	0	0	0	0	0	0	0	0	0	0	1	0	0	1	0	0	0	1	0	0	3	0	0	0	0	0
SPAC8C9.05.1:exon:3-SPAC8C9.05.1:exon:5	SPAC8C9.05.1:exon:4	120	1	0	0	0	0	0	0	0	0	0	0	0	0	0	0	0	0	0	0	0	0	0	0	0	0	0	0	0	0	0	0	0	0	0	0	0	0	0	0	0	0	0	0	0	0	0	0
SPAC15A10.08.1:exon:1-SPAC15A10.08.1:exon:3	SPAC15A10.08.1:exon:2	227	1	0	0	0	0	0	0	0	0	0	0	0	0	0	0	0	0	0	0	0	0	0	0	0	0	0	0	0	0	0	0	0	0	0	0	0	0	0	0	0	0	0	0	0	0	0	0
SPAC15A10.10.1:exon:2-SPAC15A10.10.1:exon:5	SPAC15A10.10.1:exon:3;SPAC15A10.10.1:exon:4	848	2	0	0	0	0	0	0	0	0	0	0	0	0	0	0	0	0	0	0	0	0	0	0	0	0	0	0	0	0	0	0	0	0	0	0	0	0	0	0	0	0	0	0	0	0	0	0
SPAC4H3.09.1:exon:1-SPAC4H3.09.1:exon:3	SPAC4H3.09.1:exon:2	169	1	0	0	0	0	0	0	0	0	0	0	1	0	0	0	0	0	0	0	0	0	0	0	0	0	0	0	0	0	0	0	0	0	0	0	0	0	0	0	0	0	0	0	0	0	0	0
SPAC323.04.1:exon:1-SPAC323.04.1:exon:3	SPAC323.04.1:exon:2	385	1	1	1	0	0	0	0	0	0	0	0	1	1	0	0	0	2	1	0	0	0	0	0	1	0	0	0	0	0	0	0	0	0	0	0	0	0	0	0	0	1	0	0	0	0	0	0
SPAC323.05c.1:exon:4-SPAC323.05c.1:exon:2	SPAC323.05c.1:exon:3	62	1	4	1	1	0	0	0	0	0	1	2	3	2	3	13	2	1	0	3	0	0	0	0	0	6	2	0	1	0	3	0	0	0	1	0	0	0	0	1	3	7	0	2	0	3	0	0
SPAC323.06c.1:exon:10-SPAC323.06c.1:exon:8	SPAC323.06c.1:exon:9	113	1	0	0	0	0	0	0	0	1	0	0	1	1	0	1	0	0	0	0	0	0	0	0	0	0	0	0	0	0	0	0	0	0	0	0	1	0	0	0	1	0	0	0	0	0	0	0
SPAC323.06c.1:exon:7-SPAC323.06c.1:exon:4	SPAC323.06c.1:exon:6;SPAC323.06c.1:exon:5	493	2	1	1	0	0	0	0	0	0	0	1	2	0	0	0	0	0	1	0	0	0	0	0	1	0	0	0	0	0	0	0	0	0	0	0	0	0	0	0	1	2	0	0	0	0	0	2
SPAC2F3.18c.1:exon:3-SPAC2F3.18c.1:exon:1	SPAC2F3.18c.1:exon:2	164	1	0	0	0	0	0	0	0	0	0	0	0	0	2	0	0	0	0	0	0	1	1	0	0	0	0	0	0	0	0	0	0	0	0	0	0	0	1	0	0	0	1	0	0	0	0	0
SPAC2F3.15.1:exon:1-SPAC2F3.15.1:exon:3	SPAC2F3.15.1:exon:2	91	1	0	0	0	0	0	0	0	0	0	0	0	0	0	0	0	0	0	1	0	0	0	0	0	0	0	0	0	0	0	0	0	0	0	0	0	0	0	0	0	0	0	0	0	0	0	0
SPAC2F3.16.1:exon:2-SPAC2F3.16.1:exon:4	SPAC2F3.16.1:exon:3	105	1	0	0	0	0	0	0	0	1	0	0	0	0	0	0	0	1	0	0	0	0	0	0	0	0	0	0	0	0	0	0	0	0	0	0	0	0	0	0	0	1	0	0	0	0	0	0
SPAPB18E9.01.1:exon:2-SPAPB18E9.01.1:exon:6	SPAPB18E9.01.1:exon:3;SPAPB18E9.01.1:exon:4;SPAPB18E9.01.1:exon:5	593	3	0	0	0	0	0	0	0	0	0	0	1	0	0	0	0	2	1	0	0	0	0	0	0	0	0	0	0	0	0	0	0	0	0	0	0	0	0	0	1	0	0	0	0	0	0	0
SPAPB18E9.01.1:exon:4-SPAPB18E9.01.1:exon:6	SPAPB18E9.01.1:exon:5	237	1	0	0	0	0	0	0	0	0	0	0	0	0	0	0	0	0	0	0	0	1	0	0	0	0	0	0	0	0	0	0	0	0	0	0	0	0	0	0	0	0	0	0	0	0	0	0
SPAC19G12.17.1:exon:3-SPAC19G12.17.1:exon:1	SPAC19G12.17.1:exon:2	105	1	0	0	0	0	0	0	0	0	0	0	0	0	0	0	0	0	0	0	0	0	0	0	0	0	0	0	0	0	0	0	0	0	0	0	0	0	0	1	0	1	1	0	0	0	0	0
SPAC26H5.03.1:exon:2-SPAC26H5.03.1:exon:4	SPAC26H5.03.1:exon:3	243	1	0	0	0	0	0	0	0	0	0	0	0	0	0	0	0	0	0	0	0	0	0	0	0	0	0	0	0	0	0	0	0	0	0	0	0	0	0	0	0	0	0	0	0	0	0	0
SPAC23D3.16.1:exon:1-SPAC23D3.16.1:exon:3	SPAC23D3.16.1:exon:2	56	1	0	1	1	0	0	0	0	1	1	1	6	1	2	3	2	2	3	0	3	0	1	0	0	0	0	1	0	1	1	0	0	6	2	2	0	0	0	1	0	3	4	1	1	0	2	0
SPAC30.03c.1:exon:4-SPAC30.03c.1:exon:2	SPAC30.03c.1:exon:3	83	1	0	0	0	0	0	0	0	0	0	0	0	0	0	0	0	0	0	0	0	0	1	0	0	0	0	0	0	0	0	0	0	0	0	0	0	0	1	0	0	0	0	0	0	0	0	0
SPAC17C9.08.1:exon:3-SPAC17C9.08.1:exon:1	SPAC17C9.08.1:exon:2	247	1	0	0	0	0	0	0	0	0	0	1	0	0	2	0	0	0	0	0	1	1	0	0	1	0	0	0	0	0	1	0	2	2	0	0	1	0	0	0	1	2	2	0	0	0	0	0
SPAC12B10.05.1:exon:1-SPAC12B10.05.1:exon:5	SPAC12B10.05.1:exon:2;SPAC12B10.05.1:exon:3;SPAC12B10.05.1:exon:4	151	3	0	0	0	0	0	0	0	0	0	0	0	0	0	0	0	0	0	0	0	0	0	0	0	0	0	0	0	0	0	0	0	0	0	0	0	0	0	0	0	0	0	0	0	0	0	0
SPAC12B10.05.1:exon:2-SPAC12B10.05.1:exon:5	SPAC12B10.05.1:exon:3;SPAC12B10.05.1:exon:4	48	2	0	0	0	0	0	0	0	0	0	0	0	0	0	0	0	0	0	0	0	0	0	0	0	0	0	0	0	0	0	0	0	0	0	0	0	0	0	1	0	0	1	0	0	0	0	0
SPAC12B10.05.1:exon:9-SPAC12B10.05.1:exon:11	SPAC12B10.05.1:exon:10	222	1	0	0	0	0	0	0	0	0	0	0	0	0	0	0	0	0	0	0	0	0	0	0	0	0	0	0	0	0	0	0	0	0	0	0	0	0	0	0	0	0	0	0	0	0	0	0
SPAC12B10.13.1:exon:1-SPAC12B10.13.1:exon:3	SPAC12B10.13.1:exon:2	196	1	0	0	0	0	0	0	0	0	0	0	0	1	0	0	0	0	0	0	0	0	0	1	0	0	0	0	0	1	0	0	0	0	0	0	0	0	0	0	0	1	0	0	0	0	0	0
SPAC144.05.1:exon:3-SPAC144.05.1:exon:5	SPAC144.05.1:exon:4	41	1	0	0	0	0	0	0	0	0	0	0	0	0	0	0	0	0	0	0	0	1	0	0	0	0	0	0	0	0	0	0	0	0	0	0	0	0	0	0	0	1	0	0	0	0	0	0
SPAC11H11.03c.1:exon:3-SPAC11H11.03c.1:exon:1	SPAC11H11.03c.1:exon:2	145	1	1	1	0	0	0	0	0	0	0	0	0	0	0	0	0	0	0	0	0	0	0	0	0	0	0	0	0	0	1	0	0	0	0	0	1	0	0	0	0	1	1	0	0	0	0	0
SPAC4F10.20.1:exon:2-SPAC4F10.20.1:exon:4	SPAC4F10.20.1:exon:3	98	1	0	0	0	0	0	0	0	0	0	0	0	0	0	0	0	0	0	0	0	1	0	0	0	0	0	0	0	0	0	0	0	0	0	0	0	0	0	0	0	0	0	0	0	0	0	0
SPAC19B12.09.1:exon:1-SPAC19B12.09.1:exon:3	SPAC19B12.09.1:exon:2	79	1	0	0	0	0	0	0	0	0	0	0	0	0	0	0	0	0	0	0	0	0	1	0	0	0	0	0	0	0	0	0	0	0	0	0	0	0	0	0	0	0	0	0	0	0	0	0
SPAC1B3.02c.1:exon:3-SPAC1B3.02c.1:exon:1	SPAC1B3.02c.1:exon:2	71	1	0	0	0	0	0	0	0	0	0	0	0	0	0	0	0	2	2	0	0	1	0	0	0	0	0	0	0	0	0	0	0	0	0	0	0	0	0	0	0	0	0	0	0	0	0	0
SPAC1B3.14.1:exon:1-SPAC1B3.14.1:exon:3	SPAC1B3.14.1:exon:2	6	1	0	0	0	0	0	0	0	0	0	1	1	2	0	1	1	1	1	0	0	1	2	2	3	0	0	0	0	0	0	0	0	0	0	0	0	0	0	2	0	1	0	0	0	0	0	0
SPAC1B3.14.1:exon:3-SPAC1B3.14.1:exon:5	SPAC1B3.14.1:exon:4	325	1	0	0	0	0	0	0	0	0	0	1	0	0	0	0	0	0	0	0	0	0	0	0	0	0	0	0	0	0	0	0	0	0	0	0	0	0	0	0	0	0	0	0	0	0	0	0
SPAC1952.04c.1:exon:4-SPAC1952.04c.1:exon:2	SPAC1952.04c.1:exon:3	14	1	0	0	0	0	0	0	0	0	0	0	0	0	0	0	0	0	0	0	0	0	0	0	0	0	0	0	0	0	0	0	0	0	0	0	0	0	0	0	0	0	0	0	0	0	0	0
SPAC1952.04c.1:exon:4-SPAC1952.04c.1:exon:1	SPAC1952.04c.1:exon:3;SPAC1952.04c.1:exon:2	85	2	0	0	0	0	0	0	0	0	0	0	0	0	0	0	0	0	0	0	0	0	0	0	0	0	0	0	0	0	0	0	0	0	0	0	0	0	0	0	0	0	0	1	0	0	0	0
SPAC22E12.13c.1:exon:3-SPAC22E12.13c.1:exon:1	SPAC22E12.13c.1:exon:2	139	1	0	1	0	0	2	0	0	0	0	0	3	0	0	0	1	1	2	0	0	0	0	0	0	0	0	0	0	0	0	0	0	0	0	0	0	0	0	1	1	3	1	0	0	0	2	1
SPAC1006.03c.1:exon:4-SPAC1006.03c.1:exon:2	SPAC1006.03c.1:exon:3	61	1	0	0	0	0	0	0	0	0	0	0	0	2	0	0	0	0	0	0	0	0	0	0	1	0	0	0	0	0	0	0	0	0	0	1	0	0	0	0	0	0	1	1	0	0	0	0
SPAC1250.03.1:exon:3-SPAC1250.03.1:exon:1	SPAC1250.03.1:exon:2	207	1	0	0	0	1	0	0	0	0	0	0	0	0	0	0	1	0	0	0	0	0	0	0	0	0	1	0	0	0	0	0	0	1	1	0	0	0	0	0	1	3	3	0	0	1	0	0
SPAC29A4.14c.1:exon:1-SPAC29A4.14c.1:exon:3	SPAC29A4.14c.1:exon:2	447	1	0	0	0	0	0	0	0	0	0	0	0	0	0	0	0	0	0	0	0	0	0	0	0	3	0	0	0	0	0	0	0	0	0	0	0	0	0	0	1	0	0	0	0	0	0	0
SPAC29A4.09.1:exon:3-SPAC29A4.09.1:exon:1	SPAC29A4.09.1:exon:2	106	1	0	0	0	0	0	0	0	0	0	0	0	0	0	0	0	0	0	0	0	0	0	0	0	0	0	0	0	0	0	0	0	0	0	0	0	0	0	0	0	0	0	0	0	0	0	0
SPAPJ691.03.1:exon:1-SPAPJ691.03.1:exon:3	SPAPJ691.03.1:exon:2	85	1	0	0	0	0	0	0	0	0	0	0	0	0	0	0	0	0	0	0	0	0	0	0	0	0	0	0	0	0	0	0	0	0	0	0	0	0	0	0	0	0	0	0	0	0	0	0
SPAC14C4.14.1:exon:1-SPAC14C4.14.1:exon:3	SPAC14C4.14.1:exon:2	60	1	0	0	0	0	0	0	0	0	0	0	0	0	0	0	0	0	0	0	0	0	0	0	0	0	0	0	0	0	0	0	0	0	0	0	0	0	0	1	0	1	0	0	0	0	0	0
SPAC11E3.04c.1:exon:3-SPAC11E3.04c.1:exon:1	SPAC11E3.04c.1:exon:2	85	1	0	0	0	0	0	0	0	0	0	0	0	0	1	0	0	0	0	0	0	0	1	0	0	0	0	0	0	0	0	0	0	0	0	0	0	0	0	0	0	1	0	0	0	0	0	0
SPAC3G6.01.1:five_prime_UTR:1-SPAC3G6.01.1:exon:2	SPAC3G6.01.1:exon:1	197	1	0	0	0	0	0	0	0	1	0	1	0	0	0	0	0	0	0	0	0	0	0	0	0	0	0	0	0	0	0	0	0	0	0	0	0	0	0	1	3	2	2	0	0	0	0	0
SPAC3G6.05.1:exon:1-SPAC3G6.05.1:exon:3	SPAC3G6.05.1:exon:2	72	1	0	0	0	0	0	0	0	0	0	0	0	0	0	0	0	0	0	0	0	0	0	0	0	0	0	0	0	0	0	0	0	0	0	0	0	0	0	0	0	0	0	0	0	0	0	0
SPBPB8B6.04c.1:exon:3-SPBPB8B6.04c.1:exon:1	SPBPB8B6.04c.1:exon:2	110	1	0	0	0	0	0	0	0	0	0	0	0	0	1	0	0	0	1	0	0	0	0	0	0	0	0	1	0	1	0	2	0	0	0	0	0	0	0	0	0	0	0	0	0	0	0	0
SPBC1683.13c.1:exon:4-SPBC1683.13c.1:exon:2	SPBC1683.13c.1:exon:3	25	1	0	0	0	0	0	0	0	0	0	0	0	2	0	0	0	0	0	0	0	1	0	0	0	0	0	0	0	0	0	0	0	0	0	0	0	0	0	0	0	0	0	1	0	1	1	0
SPBC1683.13c.1:exon:4-SPBC1683.13c.1:exon:1	SPBC1683.13c.1:exon:3;SPBC1683.13c.1:exon:2	108	2	0	0	0	0	0	0	0	0	0	0	0	0	0	0	0	0	0	0	0	0	0	0	0	0	0	0	0	0	0	0	0	0	0	0	0	0	0	0	0	0	0	0	0	0	0	0
SPBC660.16.1:exon:1-SPBC660.16.1:exon:5	SPBC660.16.1:exon:2;SPBC660.16.1:exon:3;SPBC660.16.1:exon:4	137	3	1	3	0	0	0	1	1	0	0	3	1	0	0	0	0	0	2	0	0	0	1	0	2	0	0	0	0	0	0	0	0	0	0	0	0	0	0	1	0	1	2	0	0	0	0	0
SPBC1271.11.1:exon:4-SPBC1271.11.1:exon:2	SPBC1271.11.1:exon:3	8	1	0	1	0	0	0	0	0	0	0	2	1	0	0	1	0	1	1	1	0	1	0	0	0	0	1	0	2	0	1	0	0	1	1	0	0	0	0	1	1	0	3	0	0	1	1	0
SPBC428.01c.1:exon:7-SPBC428.01c.1:exon:5	SPBC428.01c.1:exon:6	48	1	1	1	0	0	0	0	0	0	0	2	1	1	0	3	0	0	0	1	0	0	1	0	0	0	2	0	0	0	0	0	0	0	1	0	0	0	0	0	2	2	4	0	0	0	0	0
SPBC428.01c.1:exon:6-SPBC428.01c.1:exon:3	SPBC428.01c.1:exon:5;SPBC428.01c.1:exon:4	161	2	3	1	0	1	0	0	0	0	0	1	0	2	0	0	1	0	1	0	0	0	0	0	1	0	0	0	0	0	0	0	0	0	0	0	0	0	0	2	0	0	0	0	0	0	0	1
SPBC428.01c.1:exon:6-SPBC428.01c.1:exon:1	SPBC428.01c.1:exon:5;SPBC428.01c.1:exon:4;SPBC428.01c.1:exon:3;SPBC428.01c.1:exon:2	363	4	1	0	2	0	0	0	2	0	0	2	2	0	0	0	2	1	4	0	0	1	0	0	5	0	0	0	0	0	0	0	0	0	0	0	0	0	0	1	1	0	3	0	0	0	0	0
SPBC428.01c.1:exon:4-SPBC428.01c.1:exon:1	SPBC428.01c.1:exon:3;SPBC428.01c.1:exon:2	202	2	2	1	0	0	0	0	0	0	0	1	0	0	0	0	0	0	0	0	0	0	0	0	2	0	0	0	0	0	0	0	0	0	0	0	0	0	0	0	1	2	1	0	0	0	1	0
SPBC839.17c.1:exon:5-SPBC839.17c.1:exon:2	SPBC839.17c.1:exon:4;SPBC839.17c.1:exon:3	58	2	0	1	1	0	0	0	0	1	6	0	0	1	0	2	0	0	0	1	1	1	0	0	0	0	0	0	1	0	0	0	0	0	0	0	0	0	0	2	0	1	2	0	0	1	0	0
SPBC839.17c.1:exon:4-SPBC839.17c.1:exon:2	SPBC839.17c.1:exon:3	20	1	0	0	0	0	0	0	0	0	0	0	0	0	0	0	0	0	0	0	0	0	1	0	0	0	0	0	0	0	0	0	0	0	0	0	0	0	0	0	0	0	0	0	0	0	0	0
SPBC36.05c.1:exon:14-SPBC36.05c.1:exon:12	SPBC36.05c.1:exon:13	62	1	0	0	0	0	0	0	0	0	0	1	0	0	0	0	0	0	0	0	0	0	0	0	0	0	0	0	0	0	0	0	0	0	0	0	0	0	0	0	0	0	0	0	0	0	0	0
SPBC36.05c.1:exon:13-SPBC36.05c.1:exon:9	SPBC36.05c.1:exon:12;SPBC36.05c.1:exon:11;SPBC36.05c.1:exon:10	200	3	0	0	0	0	0	0	0	0	0	0	0	0	0	0	0	0	0	0	0	0	0	0	0	0	0	0	0	0	0	0	0	0	0	0	0	0	0	0	0	0	0	0	0	0	0	0
SPBC36.05c.1:exon:8-SPBC36.05c.1:exon:6	SPBC36.05c.1:exon:7	235	1	0	0	0	0	0	0	0	0	0	0	0	0	0	0	0	0	0	0	0	0	0	0	0	0	0	0	0	0	0	0	0	0	0	0	0	0	0	0	0	0	0	0	0	0	0	0
SPBC36.05c.1:exon:8-SPBC36.05c.1:exon:5	SPBC36.05c.1:exon:7;SPBC36.05c.1:exon:6	328	2	0	0	0	0	0	0	0	0	0	0	0	0	0	0	0	0	0	0	0	0	0	0	0	0	0	0	0	0	0	0	0	0	0	0	0	0	0	0	0	0	0	0	0	0	0	0
SPBC36.05c.1:exon:8-SPBC36.05c.1:exon:2	SPBC36.05c.1:exon:7;SPBC36.05c.1:exon:6;SPBC36.05c.1:exon:5;SPBC36.05c.1:exon:4;SPBC36.05c.1:exon:3	687	5	0	0	0	0	0	0	0	0	0	0	1	0	0	0	0	0	1	0	0	0	0	0	0	0	0	0	0	0	0	0	0	0	0	0	0	0	0	0	0	1	0	0	0	0	0	0
SPBC36.05c.1:exon:4-SPBC36.05c.1:exon:2	SPBC36.05c.1:exon:3	109	1	0	0	0	0	0	0	0	0	0	0	0	0	0	0	0	0	0	0	0	0	0	0	0	0	0	0	0	0	0	0	0	0	0	0	0	0	0	0	0	0	2	0	0	0	0	0
SPBC713.05.1:exon:1-SPBC713.05.1:exon:3	SPBC713.05.1:exon:2	37	1	0	0	0	0	0	0	1	0	0	0	0	1	0	0	0	0	0	0	0	0	0	0	0	0	0	0	0	0	0	0	0	0	0	0	0	0	0	0	0	2	5	0	0	0	0	0
SPBC1709.11c.1:exon:2-SPBC1709.11c.1:three_prime_UTR:1	SPBC1709.11c.1:exon:1	1078	1	0	0	1	0	0	0	0	0	0	0	0	1	0	0	0	0	0	0	0	1	1	0	1	0	0	0	0	0	0	0	0	0	0	0	0	0	0	1	1	0	0	0	0	0	0	0
SPBC409.05.1:exon:1-SPBC409.05.1:exon:3	SPBC409.05.1:exon:2	48	1	0	0	1	0	0	0	0	0	0	0	0	0	0	0	0	0	0	0	0	0	0	0	0	0	0	0	0	0	0	0	0	0	0	0	0	0	0	0	0	0	0	0	0	1	0	0
SPBC725.08.1:exon:1-SPBC725.08.1:exon:3	SPBC725.08.1:exon:2	108	1	0	0	0	0	0	0	0	0	0	0	0	0	0	0	0	0	0	0	0	0	0	0	0	0	0	0	0	0	0	0	0	0	0	0	0	0	0	0	0	0	0	0	0	0	0	0
SPBC725.08.1:exon:2-SPBC725.08.1:exon:4	SPBC725.08.1:exon:3	31	1	0	0	0	0	0	0	0	0	0	0	0	0	0	0	0	0	0	0	0	0	0	0	0	0	0	0	0	0	0	0	0	2	0	0	1	0	0	0	0	0	0	0	0	0	0	0
SPBC30B4.08.1:exon:1-SPBC30B4.08.1:exon:3	SPBC30B4.08.1:exon:2	108	1	2	0	0	0	0	0	0	0	0	1	0	0	1	0	0	5	0	0	0	0	0	0	0	0	0	0	0	0	0	0	0	0	0	0	0	0	0	1	1	0	0	0	1	0	0	0
SPBC27B12.05.1:exon:6-SPBC27B12.05.1:exon:8	SPBC27B12.05.1:exon:7	429	1	0	0	0	0	0	0	0	0	0	0	0	0	0	0	0	0	0	0	0	0	0	0	0	0	0	0	0	0	0	0	0	0	0	0	0	0	0	0	0	0	0	0	0	0	0	0
SPBC17A3.08.1:exon:1-SPBC17A3.08.1:exon:5	SPBC17A3.08.1:exon:2;SPBC17A3.08.1:exon:3;SPBC17A3.08.1:exon:4	671	3	0	0	0	0	0	0	0	0	3	0	0	0	0	0	0	0	3	0	0	0	0	0	0	0	0	0	0	0	0	0	0	1	0	0	0	0	0	0	0	1	1	0	0	1	0	0
SPBC11B10.09.1:exon:1-SPBC11B10.09.1:exon:3	SPBC11B10.09.1:exon:2	169	1	0	0	2	0	0	0	0	1	3	1	1	0	1	5	0	0	2	7	12	0	0	0	0	3	3	1	5	3	10	11	10	10	0	2	5	10	7	1	1	4	2	1	0	0	0	0
SPBC11B10.09.1:exon:1-SPBC11B10.09.1:exon:4	SPBC11B10.09.1:exon:2;SPBC11B10.09.1:exon:3	470	2	0	0	0	0	0	0	0	0	0	0	0	0	0	0	0	0	0	0	0	0	0	0	0	0	0	0	0	0	0	0	0	0	0	0	0	0	0	0	0	0	0	0	0	0	0	0
SPBC28F2.12.1:exon:3-SPBC28F2.12.1:exon:5	SPBC28F2.12.1:exon:4	76	1	0	0	0	0	0	0	0	0	0	0	0	2	0	0	0	0	0	0	0	0	0	0	1	0	0	0	0	0	0	0	0	0	0	0	0	0	0	1	0	0	2	1	0	0	0	0
SPBC19C2.14.1:exon:1-SPBC19C2.14.1:exon:3	SPBC19C2.14.1:exon:2	60	1	0	0	1	1	0	0	0	0	1	0	1	0	0	0	0	0	0	0	0	0	0	0	0	0	0	0	0	0	0	0	0	0	0	0	0	0	0	0	0	0	0	0	0	0	0	0
SPBC19C2.14.1:exon:2-SPBC19C2.14.1:exon:4	SPBC19C2.14.1:exon:3	130	1	2	1	0	0	0	0	1	0	0	1	3	0	0	0	0	0	0	0	0	0	0	0	0	0	0	0	0	0	0	0	0	0	0	0	0	0	0	0	1	1	1	0	0	0	0	0
SPBC11G11.06c.1:exon:4-SPBC11G11.06c.1:exon:2	SPBC11G11.06c.1:exon:3	90	1	0	0	0	0	0	0	0	0	0	0	0	0	1	0	0	0	0	1	0	0	0	0	0	0	0	0	0	0	0	0	0	0	0	0	0	0	0	0	0	0	0	0	0	0	0	0
SPBC11G11.06c.1:exon:3-SPBC11G11.06c.1:exon:1	SPBC11G11.06c.1:exon:2	76	1	2	0	0	0	0	0	0	0	0	1	0	0	0	0	1	0	0	0	0	0	0	0	2	0	0	0	0	0	0	0	0	0	0	0	0	0	0	0	0	2	1	0	1	0	2	1
SPBC18H10.04c.1:exon:4-SPBC18H10.04c.1:exon:2	SPBC18H10.04c.1:exon:3	11	1	2	0	0	0	0	0	0	1	10	1	1	1	2	0	0	1	0	4	0	1	1	1	0	1	0	1	2	3	5	1	0	3	1	3	3	0	1	0	2	5	3	3	2	18	6	7
SPBC16E9.15.1:exon:1-SPBC16E9.15.1:exon:3	SPBC16E9.15.1:exon:2	24	1	0	0	0	0	0	0	0	0	0	0	0	0	0	1	0	0	0	0	0	0	0	0	0	0	0	0	0	0	0	0	0	0	0	0	0	0	0	1	0	0	0	0	0	0	0	0
SPBC29A3.14c.1:exon:10-SPBC29A3.14c.1:exon:8	SPBC29A3.14c.1:exon:9	117	1	0	0	1	0	0	0	0	0	0	2	1	1	0	0	0	0	2	0	0	1	1	0	0	0	0	0	1	0	1	0	0	0	0	0	0	0	0	0	0	2	2	0	0	0	0	0
SPBC1711.03.1:exon:1-SPBC1711.03.1:exon:3	SPBC1711.03.1:exon:2	127	1	5	6	7	1	1	1	2	3	22	5	5	11	7	3	5	7	4	3	7	1	1	1	1	9	12	4	15	8	9	6	7	7	3	11	16	11	5	7	7	16	14	0	1	0	0	3
SPBC1711.03.1:exon:1-SPBC1711.03.1:exon:4	SPBC1711.03.1:exon:2;SPBC1711.03.1:exon:3	402	2	0	0	0	0	0	0	0	0	0	0	0	0	0	0	0	0	0	0	0	0	0	0	0	0	0	0	0	0	0	0	0	0	0	0	0	0	0	0	0	1	0	0	0	0	0	0
SPBC17G9.02c.1:exon:4-SPBC17G9.02c.1:exon:1	SPBC17G9.02c.1:exon:3;SPBC17G9.02c.1:exon:2	249	2	0	0	1	0	0	0	0	0	0	0	0	1	0	0	0	1	1	0	0	0	0	0	2	0	0	0	0	0	0	0	0	0	0	0	0	0	0	0	1	0	2	0	0	0	0	0
SPBC17G9.02c.1:exon:3-SPBC17G9.02c.1:exon:1	SPBC17G9.02c.1:exon:2	103	1	1	0	0	0	0	0	0	1	0	1	1	3	0	0	2	0	0	0	0	0	1	1	0	0	0	0	0	0	0	0	0	0	0	0	0	0	0	0	0	0	0	0	0	0	0	0
SPBC15C4.01c.1:exon:5-SPBC15C4.01c.1:exon:3	SPBC15C4.01c.1:exon:4	144	1	0	0	0	0	0	0	0	0	0	0	0	0	0	0	0	0	0	0	0	0	0	0	0	0	0	0	0	0	0	0	0	0	0	0	0	0	0	0	0	0	0	0	0	0	0	0
SPBC16H5.13.1:five_prime_UTR:2-SPBC16H5.13.1:exon:2	SPBC16H5.13.1:exon:3	447	1	0	2	0	0	0	0	0	1	0	0	1	1	0	2	0	0	0	1	0	0	0	0	0	0	0	1	1	0	0	6	0	6	0	0	0	0	0	2	0	1	2	1	0	11	2	3
SPBC16H5.03c.1:exon:1-SPBC16H5.03c.1:exon:3	SPBC16H5.03c.1:exon:2	81	1	0	0	0	0	0	0	0	0	0	0	0	1	0	0	0	0	0	0	0	0	0	0	0	0	0	0	0	0	0	0	0	0	0	0	2	0	0	0	0	0	0	0	0	0	0	0
SPBC12D12.03.1:exon:2-SPBC12D12.03.1:exon:4	SPBC12D12.03.1:exon:3	86	1	0	0	0	0	0	0	0	0	0	0	0	1	0	0	1	0	0	0	0	1	0	0	1	0	0	0	0	0	0	0	0	0	0	0	0	0	0	1	2	2	1	0	0	0	0	1
SPBC12D12.09.1:exon:1-SPBC12D12.09.1:exon:4	SPBC12D12.09.1:exon:2;SPBC12D12.09.1:exon:3	78	2	0	0	0	0	0	0	0	0	0	0	0	0	0	1	0	0	0	0	0	0	0	0	0	0	0	0	0	0	0	0	0	0	0	0	0	0	0	0	0	0	0	0	0	0	0	0
SPBC12D12.09.1:exon:1-SPBC12D12.09.1:exon:6	SPBC12D12.09.1:exon:2;SPBC12D12.09.1:exon:3;SPBC12D12.09.1:exon:4;SPBC12D12.09.1:exon:5	307	4	0	0	0	0	0	0	0	0	0	0	0	0	0	0	0	0	0	0	0	1	0	0	0	0	0	0	0	0	0	0	0	0	0	0	0	0	0	0	0	0	0	0	0	0	0	0
SPBC12D12.09.1:exon:3-SPBC12D12.09.1:exon:5	SPBC12D12.09.1:exon:4	113	1	0	0	0	0	0	0	0	0	0	0	0	0	0	0	0	0	0	0	0	0	0	0	0	0	0	0	0	0	0	0	0	0	0	0	0	0	0	0	0	0	0	0	0	1	0	4
SPBC24C6.11.1:exon:1-SPBC24C6.11.1:exon:3	SPBC24C6.11.1:exon:2	380	1	0	0	3	0	0	0	0	0	0	1	1	0	0	0	0	2	3	0	0	1	1	0	3	0	0	0	0	0	0	0	0	0	0	0	0	0	0	0	0	3	2	0	0	0	0	2
SPBC19G7.03c.1:exon:3-SPBC19G7.03c.1:exon:1	SPBC19G7.03c.1:exon:2	129	1	1	3	5	1	1	0	0	0	0	4	3	0	0	0	0	2	5	0	0	0	0	0	2	0	0	4	3	0	1	1	0	0	0	0	0	0	0	8	12	13	15	0	0	0	2	3
SPBC19G7.17.1:exon:1-SPBC19G7.17.1:exon:3	SPBC19G7.17.1:exon:2	68	1	0	0	0	0	0	0	0	0	0	0	0	1	0	0	0	0	0	1	0	1	0	0	0	0	0	0	0	0	0	0	0	0	0	0	0	0	0	0	2	0	0	0	0	0	0	0
SPBC19G7.17.1:exon:2-SPBC19G7.17.1:exon:5	SPBC19G7.17.1:exon:3;SPBC19G7.17.1:exon:4	146	2	1	0	1	0	0	0	0	0	0	0	0	0	0	0	0	0	0	0	0	0	0	0	0	0	0	0	0	0	0	0	0	0	0	0	0	0	0	0	0	0	0	0	0	0	0	0
SPBC19G7.17.1:exon:3-SPBC19G7.17.1:exon:5	SPBC19G7.17.1:exon:4	33	1	1	2	1	0	2	0	0	1	0	7	1	2	1	1	1	5	4	0	0	0	0	0	0	0	0	0	0	0	0	0	0	0	0	0	0	0	0	2	3	11	4	0	0	0	0	0
SPBC29A10.14.1:exon:3-SPBC29A10.14.1:exon:5	SPBC29A10.14.1:exon:4	1250	1	0	0	0	0	0	0	0	0	0	0	0	0	0	0	0	0	0	0	0	0	0	0	0	0	0	0	0	0	0	0	0	0	0	0	0	0	0	0	0	0	0	0	0	0	0	0
SPBC25B2.11.1:exon:1-SPBC25B2.11.1:exon:3	SPBC25B2.11.1:exon:2	140	1	0	0	0	0	0	0	0	0	0	0	0	0	0	0	0	0	0	0	0	0	0	0	0	0	1	0	0	1	0	0	0	0	0	0	0	0	0	0	0	0	0	0	0	1	0	0
SPBC6B1.10.1:exon:1-SPBC6B1.10.1:exon:3	SPBC6B1.10.1:exon:2	765	1	0	0	0	0	0	0	0	0	0	0	0	0	0	0	0	0	0	0	0	1	0	0	0	0	0	0	0	0	0	0	0	0	0	0	0	0	0	0	0	0	0	0	0	0	0	0
SPBC3E7.07c.1:exon:6-SPBC3E7.07c.1:exon:3	SPBC3E7.07c.1:exon:5;SPBC3E7.07c.1:exon:4	40	2	2	0	1	0	0	0	0	0	1	1	0	2	0	0	2	2	0	0	0	1	0	0	0	0	0	0	0	0	1	0	0	0	0	0	0	0	0	1	1	2	0	0	0	0	0	0
SPBC3E7.07c.1:exon:5-SPBC3E7.07c.1:exon:3	SPBC3E7.07c.1:exon:4	28	1	1	0	0	0	0	0	0	0	0	1	0	2	0	0	1	1	0	1	0	0	0	0	0	0	0	0	1	0	0	0	2	0	0	0	0	0	1	0	0	0	1	0	0	0	1	0
SPBC32F12.04.1:exon:1-SPBC32F12.04.1:exon:6	SPBC32F12.04.1:exon:2;SPBC32F12.04.1:exon:3;SPBC32F12.04.1:exon:4;SPBC32F12.04.1:exon:5	1109	4	0	0	0	0	0	0	0	0	0	0	0	0	0	0	0	0	0	0	0	0	0	0	0	0	0	0	0	0	0	0	0	0	0	0	0	0	0	0	0	1	0	0	0	0	0	0
SPBP4H10.08.1:exon:1-SPBP4H10.08.1:exon:3	SPBP4H10.08.1:exon:2	71	1	0	0	0	0	0	0	0	1	5	1	6	1	4	3	0	0	0	4	5	0	0	0	1	11	17	7	17	13	13	17	22	11	3	3	5	21	5	3	3	5	8	0	0	8	0	0
SPBP4H10.08.1:exon:2-SPBP4H10.08.1:exon:5	SPBP4H10.08.1:exon:3;SPBP4H10.08.1:exon:4	94	2	0	0	0	0	0	0	0	0	0	0	0	0	0	0	0	0	1	0	0	0	0	0	0	0	0	0	0	0	0	0	0	0	0	0	0	0	0	0	0	0	1	0	0	0	0	0
SPBC1703.04.1:exon:2-SPBC1703.04.1:exon:4	SPBC1703.04.1:exon:3	173	1	0	0	0	0	0	0	0	0	1	0	1	1	0	0	0	0	0	0	0	0	0	0	0	1	0	0	0	1	0	0	0	0	0	0	1	0	1	2	1	2	0	0	0	0	0	0
SPBC1703.07.1:exon:1-SPBC1703.07.1:exon:3	SPBC1703.07.1:exon:2	74	1	0	0	0	0	0	0	0	0	0	0	0	0	0	0	0	0	0	0	0	0	0	0	0	0	0	0	0	0	0	0	0	0	0	0	0	0	0	0	0	0	0	0	0	0	0	0
SPBC2D10.12.1:exon:3-SPBC2D10.12.1:exon:5	SPBC2D10.12.1:exon:4	69	1	0	0	0	0	0	0	0	1	0	0	0	0	0	0	0	0	0	0	0	0	0	0	0	0	4	0	0	0	0	1	0	2	0	0	0	0	0	0	0	1	0	0	0	0	0	0
SPBC15D4.11c.1:exon:3-SPBC15D4.11c.1:exon:1	SPBC15D4.11c.1:exon:2	154	1	0	0	1	0	0	0	0	0	0	0	1	0	1	0	0	0	0	0	0	0	0	0	0	0	0	0	0	0	0	0	0	0	0	0	0	0	0	0	0	0	0	0	0	0	0	0
SPBC15D4.15.1:exon:1-SPBC15D4.15.1:exon:3	SPBC15D4.15.1:exon:2	69	1	0	0	0	0	0	0	0	0	0	0	0	0	0	0	0	0	0	0	0	0	0	0	0	0	0	0	0	0	0	0	0	0	0	0	0	0	0	0	0	0	0	0	0	1	0	0
SPBC1778.08c.1:exon:4-SPBC1778.08c.1:exon:2	SPBC1778.08c.1:exon:3	100	1	0	0	0	0	0	0	0	1	2	0	0	0	3	0	0	0	0	0	1	0	1	0	0	1	8	2	2	0	1	7	1	3	1	2	4	3	0	1	2	2	3	0	0	0	0	0
SPBC1778.10c.1:exon:5-SPBC1778.10c.1:exon:1	SPBC1778.10c.1:exon:4;SPBC1778.10c.1:exon:3;SPBC1778.10c.1:exon:2	518	3	0	0	0	0	0	0	0	0	0	0	0	0	0	0	0	0	0	0	0	1	0	0	0	0	0	0	0	0	0	1	0	1	0	0	0	0	0	0	0	0	0	2	0	0	0	0
SPBC4C3.10c.1:exon:1-SPBC4C3.10c.1:exon:3	SPBC4C3.10c.1:exon:2	83	1	2	0	0	0	0	0	0	4	8	0	0	1	7	8	0	1	2	5	2	0	0	0	0	3	1	0	1	1	4	2	0	0	1	0	0	0	0	2	3	4	0	0	0	2	0	0
SPBC776.10c.1:exon:3-SPBC776.10c.1:exon:1	SPBC776.10c.1:exon:2	962	1	0	0	0	0	0	0	0	0	0	0	0	0	0	0	0	0	0	0	0	0	0	0	0	0	0	0	0	0	0	0	0	0	0	0	0	0	0	1	0	0	1	0	0	0	0	1
SPBC776.18c.1:exon:6-SPBC776.18c.1:exon:1	SPBC776.18c.1:exon:5;SPBC776.18c.1:exon:4;SPBC776.18c.1:exon:3;SPBC776.18c.1:exon:2	787	4	0	0	0	0	0	0	0	0	0	0	0	0	0	0	0	1	0	0	0	0	0	0	0	0	0	0	0	0	0	0	0	0	0	0	0	0	0	0	0	2	0	0	0	0	1	0
SPBC25H2.14.1:exon:5-SPBC25H2.14.1:exon:3	SPBC25H2.14.1:exon:4	4	1	1	0	1	0	0	0	0	0	3	0	0	0	2	3	1	0	0	0	0	0	1	0	0	0	0	1	0	0	0	0	0	0	0	0	0	0	0	0	0	0	0	1	0	1	1	0
SPBC25H2.03.1:exon:5-SPBC25H2.03.1:exon:3	SPBC25H2.03.1:exon:4	105	1	0	0	0	0	0	0	0	0	0	1	0	0	0	1	0	0	0	0	0	0	0	0	0	0	0	0	0	0	0	0	0	0	0	0	0	0	0	0	0	1	0	0	0	0	0	0
SPBC20F10.09.1:exon:1-SPBC20F10.09.1:exon:3	SPBC20F10.09.1:exon:2	124	1	0	0	1	0	0	0	0	0	1	0	0	0	0	3	0	1	0	1	2	1	0	0	0	2	1	3	0	0	0	2	1	0	1	0	1	0	0	3	3	3	2	0	1	0	0	1
SPBC17D11.01.1:exon:1-SPBC17D11.01.1:exon:3	SPBC17D11.01.1:exon:2	55	1	1	0	0	0	0	0	0	0	0	0	0	0	3	3	0	0	0	2	0	0	0	0	0	0	0	1	0	1	0	0	0	0	0	0	1	0	0	0	2	1	3	0	0	0	0	0
SPBC11C11.08.1:exon:1-SPBC11C11.08.1:exon:3	SPBC11C11.08.1:exon:2	57	1	0	0	2	0	0	0	0	0	0	9	1	0	0	0	0	0	3	0	0	1	0	0	1	0	0	0	0	0	0	0	0	0	0	0	0	0	0	3	3	2	6	0	0	0	0	1
SPBC13A2.01c.1:exon:3-SPBC13A2.01c.1:exon:1	SPBC13A2.01c.1:exon:2	208	1	1	0	0	0	0	0	0	0	0	0	0	2	0	0	0	0	1	0	0	0	1	0	1	0	0	0	0	0	0	0	0	0	0	0	0	0	1	0	0	1	2	0	0	0	1	2
SPBC2G2.03c.1:exon:4-SPBC2G2.03c.1:exon:2	SPBC2G2.03c.1:exon:3	62	1	10	9	5	0	0	0	1	1	11	9	9	1	7	3	5	9	10	13	12	3	1	4	3	8	21	25	16	15	13	6	20	12	6	12	1	16	6	7	12	14	13	13	5	11	8	16
SPBC2G2.09c.1:exon:4-SPBC2G2.09c.1:exon:2	SPBC2G2.09c.1:exon:3	56	1	0	0	0	0	0	0	0	0	0	0	0	0	0	0	0	0	0	0	0	0	0	0	0	0	0	0	2	0	0	0	0	0	0	0	0	0	0	0	0	0	0	0	0	0	0	0
SPBC2G2.11.1:exon:2-SPBC2G2.11.1:exon:4	SPBC2G2.11.1:exon:3	891	1	1	0	0	0	0	0	0	0	0	0	0	0	0	0	0	0	1	0	0	0	0	0	1	0	0	0	0	0	0	0	0	0	0	0	0	0	0	0	0	0	0	0	0	0	1	0
SPBC2G2.15c.1:exon:5-SPBC2G2.15c.1:exon:3	SPBC2G2.15c.1:exon:4	51	1	1	0	1	0	0	0	0	0	0	0	0	0	0	1	0	0	0	0	0	0	0	0	0	0	0	6	0	0	4	0	2	0	0	0	0	0	0	1	2	0	0	0	0	0	0	1
SPBC1105.09.1:exon:1-SPBC1105.09.1:exon:3	SPBC1105.09.1:exon:2	144	1	0	0	0	0	0	0	0	0	0	0	0	0	0	0	0	0	0	0	0	0	0	0	0	0	0	0	0	0	0	0	0	0	0	0	0	0	0	0	0	0	0	0	0	0	0	0
SPBC1105.09.1:exon:3-SPBC1105.09.1:exon:5	SPBC1105.09.1:exon:4	226	1	0	0	0	0	0	0	0	0	0	0	0	0	0	0	0	0	0	0	0	0	0	0	0	0	0	0	1	0	0	0	0	0	0	0	0	0	0	0	0	0	0	0	0	0	0	0
SPBC13G1.14c.1:exon:3-SPBC13G1.14c.1:exon:1	SPBC13G1.14c.1:exon:2	106	1	0	0	0	0	0	0	0	0	0	0	0	0	0	0	0	0	0	0	0	0	0	0	0	0	0	0	0	0	0	0	0	0	0	0	0	0	0	0	0	0	0	0	0	0	0	0
SPBC3B9.08c.1:exon:6-SPBC3B9.08c.1:exon:4	SPBC3B9.08c.1:exon:5	27	1	0	0	1	0	0	0	0	0	0	2	0	1	0	0	0	0	1	0	5	1	0	0	1	0	2	0	2	0	0	0	0	0	2	0	1	0	0	3	1	1	2	0	0	0	0	2
SPBC3B9.08c.1:exon:4-SPBC3B9.08c.1:exon:2	SPBC3B9.08c.1:exon:3	64	1	0	1	0	0	0	0	0	0	0	0	0	1	0	0	0	0	0	0	0	0	0	0	0	0	0	0	0	0	0	0	0	0	0	0	0	0	0	0	0	1	1	0	0	0	0	0
SPBC3B9.08c.1:exon:4-SPBC3B9.08c.1:exon:1	SPBC3B9.08c.1:exon:3;SPBC3B9.08c.1:exon:2	152	2	0	0	1	0	0	0	0	0	0	0	1	1	0	0	0	1	0	0	0	0	0	0	1	0	0	2	0	0	0	1	3	0	2	0	1	0	0	1	1	2	0	0	0	0	0	0
SPBC3B9.10.1:exon:1-SPBC3B9.10.1:exon:3	SPBC3B9.10.1:exon:2	106	1	0	0	0	0	0	0	0	0	0	1	0	1	0	0	0	1	0	0	0	0	0	0	0	0	0	0	3	0	1	4	0	0	0	0	0	0	0	0	0	0	0	0	0	0	1	0
SPBC3B9.10.1:exon:1-SPBC3B9.10.1:exon:4	SPBC3B9.10.1:exon:2;SPBC3B9.10.1:exon:3	217	2	0	0	0	0	0	0	0	0	0	1	0	0	0	0	1	0	0	0	0	0	0	0	0	0	0	0	0	0	0	0	0	0	0	0	0	0	0	0	0	0	1	0	0	0	0	0
SPBC3B9.10.1:exon:1-SPBC3B9.10.1:exon:5	SPBC3B9.10.1:exon:2;SPBC3B9.10.1:exon:3;SPBC3B9.10.1:exon:4	469	3	0	1	0	0	0	0	0	0	0	1	2	1	0	0	0	0	0	0	0	1	0	0	0	0	0	0	0	0	0	0	0	0	0	0	0	0	0	1	2	2	2	0	0	0	1	0
SPBC3B9.13c.1:exon:3-SPBC3B9.13c.1:exon:1	SPBC3B9.13c.1:exon:2	240	1	2	1	0	0	0	0	0	1	0	1	1	0	0	0	1	0	0	0	0	0	0	0	1	0	0	0	0	0	0	0	0	0	0	0	0	0	0	1	0	3	4	0	0	0	0	0
SPBC1347.07.1:exon:1-SPBC1347.07.1:exon:5	SPBC1347.07.1:exon:2;SPBC1347.07.1:exon:3;SPBC1347.07.1:exon:4	233	3	0	0	0	0	0	0	0	0	0	0	0	0	0	0	0	0	0	0	0	0	0	0	0	0	0	0	0	0	0	0	0	0	0	0	0	0	0	0	0	0	0	0	0	0	0	0
SPBC16A3.12c.1:exon:1-SPBC16A3.12c.1:exon:3	SPBC16A3.12c.1:exon:2	424	1	0	0	0	0	0	0	0	0	0	0	0	0	0	0	0	0	0	0	0	0	0	0	0	0	0	0	0	0	0	0	0	0	0	0	0	0	0	0	1	0	1	0	0	0	0	0
SPBC16C6.08c.1:five_prime_UTR:2-SPBC16C6.08c.1:exon:2	SPBC16C6.08c.1:exon:4;SPBC16C6.08c.1:exon:3	291	2	0	1	0	0	0	0	0	0	0	0	0	0	0	0	0	0	0	0	0	0	0	0	0	0	0	0	0	0	0	0	0	3	0	0	0	0	0	0	0	0	0	0	0	0	0	0
SPBC16C6.08c.1:five_prime_UTR:2-SPBC16C6.08c.1:exon:1	SPBC16C6.08c.1:exon:4;SPBC16C6.08c.1:exon:3;SPBC16C6.08c.1:exon:2	480	3	0	0	0	0	0	0	0	0	0	0	2	0	0	0	0	0	0	0	0	0	0	0	0	0	0	0	0	0	0	0	0	0	0	0	0	0	0	0	0	1	0	0	0	0	1	0
SPBC16C6.08c.1:exon:4-SPBC16C6.08c.1:exon:1	SPBC16C6.08c.1:exon:3;SPBC16C6.08c.1:exon:2	261	2	0	0	0	0	0	0	1	0	0	0	0	0	0	0	0	0	0	0	0	0	0	0	0	0	0	0	0	0	0	0	0	0	0	0	0	0	0	0	0	0	1	0	1	0	0	0
SPBC16C6.08c.1:exon:3-SPBC16C6.08c.1:exon:1	SPBC16C6.08c.1:exon:2	189	1	2	7	4	0	0	1	0	0	0	6	1	6	1	0	2	2	2	0	0	2	0	2	5	0	0	0	0	0	1	0	0	0	0	0	0	0	0	27	11	8	13	0	1	0	3	3
SPBC31E1.03.1:exon:3-SPBC31E1.03.1:exon:1	SPBC31E1.03.1:exon:2	102	1	0	0	0	0	0	0	0	0	0	0	0	0	0	0	0	0	0	0	0	0	0	0	0	0	0	0	0	0	0	0	0	0	0	0	0	0	0	0	0	0	0	0	0	0	0	0
SPBC106.05c.1:exon:3-SPBC106.05c.1:exon:1	SPBC106.05c.1:exon:2	172	1	2	2	1	0	0	0	0	0	0	0	2	0	0	0	0	0	1	0	0	0	0	0	0	0	0	0	0	0	0	0	0	0	0	0	0	0	0	0	1	1	0	0	0	0	1	0
SPBC106.15.1:exon:1-SPBC106.15.1:exon:3	SPBC106.15.1:exon:2	339	1	0	0	0	0	0	0	0	0	0	0	0	0	0	0	0	0	0	0	0	0	0	0	0	0	0	0	0	0	0	0	0	0	0	0	0	4	0	1	1	0	0	0	0	0	0	0
SPBC428.13c.1:exon:3-SPBC428.13c.1:exon:1	SPBC428.13c.1:exon:2	400	1	0	0	0	0	0	0	0	0	0	0	1	0	0	0	0	0	1	0	0	0	0	0	0	0	0	0	0	0	0	0	0	0	0	0	0	0	0	0	0	2	0	0	0	0	0	0
SPBC902.05c.1:exon:4-SPBC902.05c.1:exon:2	SPBC902.05c.1:exon:3	49	1	0	0	0	0	0	0	0	0	0	0	0	0	0	0	0	0	0	0	0	1	1	0	0	0	0	0	0	0	0	0	0	0	0	0	0	0	0	0	0	0	0	0	0	0	0	0
SPBC1685.09.1:exon:1-SPBC1685.09.1:exon:3	SPBC1685.09.1:exon:2	100	1	1	1	0	0	0	0	0	0	0	1	0	1	0	0	0	0	0	0	0	0	0	2	0	0	0	0	0	0	0	0	0	0	0	0	0	0	0	1	0	0	0	0	0	0	0	0
SPBC354.01.1:exon:2-SPBC354.01.1:exon:4	SPBC354.01.1:exon:3	171	1	0	0	0	0	0	0	0	0	1	1	0	0	1	0	3	0	0	0	5	0	0	0	0	0	0	0	0	0	0	0	2	2	0	2	0	0	0	3	6	6	1	0	0	0	1	0
SPBC354.06.1:exon:1-SPBC354.06.1:exon:3	SPBC354.06.1:exon:2	181	1	0	2	1	0	0	0	0	0	0	0	1	0	0	0	0	0	0	0	1	0	1	0	3	1	2	0	3	1	0	3	0	2	0	2	0	4	0	0	0	0	1	1	0	3	1	0
SPBC354.07c.1:exon:5-SPBC354.07c.1:exon:2	SPBC354.07c.1:exon:4;SPBC354.07c.1:exon:3	39	2	0	0	0	0	0	0	0	0	0	0	0	0	0	0	0	0	0	0	0	0	0	0	0	0	0	0	0	0	0	0	0	0	0	0	0	0	0	0	0	0	0	0	0	0	0	0
SPBC577.09.1:exon:1-SPBC577.09.1:exon:4	SPBC577.09.1:exon:2;SPBC577.09.1:exon:3	256	2	0	0	0	0	0	0	0	0	0	0	0	0	0	0	0	0	0	0	0	1	0	0	0	0	0	0	0	0	0	0	0	0	0	0	0	0	0	0	0	0	0	0	0	0	0	0
SPBC713.02c.1:exon:3-SPBC713.02c.1:exon:1	SPBC713.02c.1:exon:2	91	1	0	1	0	0	0	0	0	0	0	0	1	0	0	0	0	0	0	0	0	0	0	0	1	2	0	0	0	0	0	0	0	0	0	0	0	0	0	0	1	2	1	0	0	0	0	2
SPBC646.11.1:exon:2-SPBC646.11.1:exon:4	SPBC646.11.1:exon:3	64	1	1	0	0	0	0	0	1	1	0	0	2	1	1	1	0	1	0	1	0	0	0	1	0	0	0	0	0	0	0	4	0	0	0	0	0	0	0	1	1	0	1	0	0	0	1	2
SPBC337.07c.1:exon:4-SPBC337.07c.1:exon:2	SPBC337.07c.1:exon:3	129	1	0	0	0	0	0	0	0	0	0	0	0	0	0	0	0	0	0	0	0	0	0	0	0	0	0	0	0	0	0	0	0	0	0	0	0	0	0	0	0	0	0	0	0	0	0	0
SPBC337.07c.1:exon:4-SPBC337.07c.1:exon:1	SPBC337.07c.1:exon:3;SPBC337.07c.1:exon:2	377	2	0	0	0	0	0	0	0	0	0	1	1	0	0	0	0	0	1	0	0	0	0	0	0	0	0	0	0	0	0	0	0	0	0	0	0	0	0	1	1	0	0	0	0	0	0	0
SPBC337.09.1:exon:1-SPBC337.09.1:exon:3	SPBC337.09.1:exon:2	91	1	0	1	2	0	0	0	0	1	8	5	1	0	8	13	0	0	0	0	6	0	0	0	0	1	0	0	4	4	3	7	0	3	2	1	1	4	4	1	3	1	8	0	0	0	0	0
SPBC337.14.1:exon:1-SPBC337.14.1:exon:3	SPBC337.14.1:exon:2	106	1	0	0	0	0	0	0	0	0	0	0	0	0	1	0	0	1	0	0	0	0	0	0	0	0	0	0	0	2	0	0	0	0	0	0	0	0	0	0	0	0	0	0	0	0	0	0
SPBC337.14.1:exon:1-SPBC337.14.1:exon:4	SPBC337.14.1:exon:2;SPBC337.14.1:exon:3	184	2	0	0	1	0	0	0	0	0	0	0	1	0	0	0	0	1	0	0	0	0	0	0	0	0	0	0	0	0	0	0	0	0	0	0	0	0	0	1	1	2	2	0	0	0	0	1
SPBC337.14.1:exon:2-SPBC337.14.1:exon:4	SPBC337.14.1:exon:3	78	1	0	0	1	0	0	0	0	0	0	1	0	0	0	1	0	0	1	0	0	1	2	1	0	0	0	0	0	2	0	0	0	0	0	0	0	0	0	1	2	3	0	0	0	0	0	0
SPBC1734.08.1:exon:1-SPBC1734.08.1:exon:3	SPBC1734.08.1:exon:2	76	1	0	0	0	0	0	0	0	1	0	0	0	0	3	0	0	0	0	0	1	0	0	0	0	4	2	0	0	0	3	0	0	0	0	0	0	0	0	1	1	0	1	0	0	0	0	0
SPBC1709.02c.1:exon:4-SPBC1709.02c.1:exon:2	SPBC1709.02c.1:exon:3	52	1	0	1	1	0	0	0	0	2	7	3	0	0	2	1	2	3	3	2	1	0	0	0	0	7	1	3	2	1	0	8	0	3	4	0	0	0	0	5	7	6	6	0	0	1	1	2
SPBC1709.14.1:exon:3-SPBC1709.14.1:exon:5	SPBC1709.14.1:exon:4	39	1	1	0	0	1	0	0	0	0	1	0	3	2	1	2	1	0	0	0	0	1	0	0	0	0	0	1	0	0	0	0	2	0	0	2	1	0	0	0	1	1	0	0	1	0	0	0
SPBC409.03.1:exon:1-SPBC409.03.1:exon:3	SPBC409.03.1:exon:2	86	1	0	1	0	0	0	0	0	1	0	1	3	0	0	1	2	1	0	4	0	0	0	0	0	0	1	2	2	0	0	4	0	0	0	0	0	0	0	1	2	0	0	1	3	0	1	3
SPBC651.02.1:exon:2-SPBC651.02.1:exon:4	SPBC651.02.1:exon:3	435	1	0	0	0	0	0	0	0	0	0	0	0	0	0	0	0	0	0	0	0	1	0	0	1	0	0	0	0	0	0	0	0	0	0	0	0	0	0	1	0	0	0	0	0	0	0	0
SPBC651.02.1:exon:3-SPBC651.02.1:exon:5	SPBC651.02.1:exon:4	16	1	0	0	0	0	0	0	0	0	0	0	0	0	0	1	0	0	0	0	0	0	0	0	0	0	0	0	0	0	0	0	0	0	0	0	0	0	1	0	0	0	0	0	0	0	0	0
SPBC3D6.05.1:exon:1-SPBC3D6.05.1:exon:3	SPBC3D6.05.1:exon:2	239	1	0	0	0	0	0	0	0	0	0	0	0	0	0	0	0	0	0	0	0	0	1	0	0	0	0	0	0	0	0	0	0	0	0	0	0	0	0	0	0	0	0	0	0	0	0	0
SPBC3D6.08c.1:exon:4-SPBC3D6.08c.1:exon:2	SPBC3D6.08c.1:exon:3	69	1	0	0	0	0	0	0	0	0	0	0	0	0	0	0	0	0	0	0	0	0	0	0	0	0	0	0	0	0	0	0	0	0	0	0	0	0	0	0	0	0	0	0	0	0	0	0
SPBC27B12.08.1:exon:4-SPBC27B12.08.1:exon:8	SPBC27B12.08.1:exon:5;SPBC27B12.08.1:exon:6;SPBC27B12.08.1:exon:7	1527	3	1	1	1	0	0	0	0	0	0	1	1	0	0	0	0	1	1	0	0	0	1	0	0	0	0	0	0	0	0	0	0	0	0	0	0	0	0	1	0	1	2	0	0	0	4	2
SPBC17A3.03c.1:exon:3-SPBC17A3.03c.1:exon:1	SPBC17A3.03c.1:exon:2	77	1	0	0	0	0	0	0	0	0	0	0	0	0	0	0	0	1	0	0	0	1	1	0	0	0	0	0	0	1	0	0	0	0	0	0	0	0	0	1	0	1	0	0	0	0	0	0
SPBC1215.02c.1:exon:8-SPBC1215.02c.1:exon:6	SPBC1215.02c.1:exon:7	139	1	0	0	0	0	0	0	0	0	0	0	0	0	0	0	0	0	0	0	0	0	0	0	0	0	0	0	0	0	0	0	0	0	0	0	0	0	0	2	0	2	1	0	0	0	0	0
SPBC1215.02c.1:exon:7-SPBC1215.02c.1:exon:5	SPBC1215.02c.1:exon:6	119	1	0	0	0	0	0	0	0	0	0	0	0	0	0	0	0	0	0	0	0	0	0	0	0	0	0	0	0	0	0	0	0	0	0	0	0	0	0	0	0	0	0	0	0	0	0	0
SPBC21B10.06c.1:exon:1-SPBC21B10.06c.1:exon:3	SPBC21B10.06c.1:exon:2	113	1	0	0	0	0	0	0	0	0	0	0	0	0	0	0	0	0	0	0	0	0	1	0	0	0	0	0	0	0	0	0	0	0	0	0	0	0	0	0	0	0	0	0	0	0	0	0
SPBC9B6.05c.1:exon:5-SPBC9B6.05c.1:exon:1	SPBC9B6.05c.1:exon:4;SPBC9B6.05c.1:exon:3;SPBC9B6.05c.1:exon:2	226	3	0	1	3	0	0	0	0	0	0	1	1	0	0	0	0	0	0	0	0	0	0	0	0	0	0	0	0	0	0	0	0	0	0	0	0	0	0	0	1	1	2	0	0	0	0	0
SPBC9B6.05c.1:exon:4-SPBC9B6.05c.1:exon:2	SPBC9B6.05c.1:exon:3	18	1	2	0	0	0	0	0	0	0	1	1	0	0	5	5	1	0	1	0	0	0	0	0	0	1	0	0	0	0	0	0	0	0	0	0	0	0	0	1	0	0	0	0	0	0	0	0
SPBC3H7.01.1:exon:5-SPBC3H7.01.1:exon:3	SPBC3H7.01.1:exon:4	126	1	0	0	0	0	0	0	0	0	0	0	0	0	0	0	0	0	0	0	0	0	0	0	0	0	0	0	0	0	0	0	0	0	0	0	0	0	0	0	0	0	0	0	0	0	0	0
SPBC1A4.08c.1:exon:3-SPBC1A4.08c.1:exon:1	SPBC1A4.08c.1:exon:2	74	1	0	0	0	0	0	0	0	0	1	1	0	0	2	1	0	0	0	1	1	0	0	0	0	0	0	0	0	0	2	4	1	0	0	0	0	0	3	0	0	4	0	0	0	1	0	1
SPBC23G7.16.1:exon:1-SPBC23G7.16.1:exon:3	SPBC23G7.16.1:exon:2	26	1	0	0	0	0	0	0	0	0	0	0	0	0	0	0	0	0	0	0	0	0	0	0	1	0	0	0	0	0	0	0	0	0	0	0	0	0	0	0	0	0	0	0	0	0	0	0
SPBC17G9.08c.1:exon:5-SPBC17G9.08c.1:exon:3	SPBC17G9.08c.1:exon:4	183	1	0	0	1	0	0	0	0	0	0	0	0	0	0	0	0	0	0	0	0	0	0	0	0	0	0	0	0	0	0	0	0	0	0	0	0	0	0	1	0	1	2	0	0	0	0	0
SPBC17G9.08c.1:exon:5-SPBC17G9.08c.1:exon:1	SPBC17G9.08c.1:exon:4;SPBC17G9.08c.1:exon:3;SPBC17G9.08c.1:exon:2	1954	3	0	0	0	0	0	0	0	0	0	0	0	0	0	0	0	0	0	0	0	0	0	0	0	0	0	0	0	0	0	0	0	0	0	0	0	0	0	0	0	0	0	0	0	0	0	0
SPBC14C8.19.1:exon:4-SPBC14C8.19.1:exon:2	SPBC14C8.19.1:exon:3	55	1	0	0	0	0	0	0	0	0	3	0	0	0	6	5	0	0	2	5	0	0	0	0	0	1	0	1	7	2	4	9	0	0	0	2	0	3	0	0	2	0	0	0	0	0	0	0
SPBC19G7.10c.1:exon:4-SPBC19G7.10c.1:exon:2	SPBC19G7.10c.1:exon:3	1789	1	1	0	0	0	0	0	0	0	0	1	1	0	0	0	0	0	0	0	0	0	1	0	0	0	0	0	0	0	0	0	0	0	0	0	0	0	0	0	0	0	1	0	0	0	0	0
SPBC19G7.10c.1:exon:3-SPBC19G7.10c.1:exon:1	SPBC19G7.10c.1:exon:2	171	1	2	0	5	0	0	0	0	0	0	5	3	3	0	0	1	1	2	0	0	0	0	0	3	0	0	0	0	0	0	0	0	0	0	0	0	0	0	2	1	2	5	0	0	0	2	2
SPBC36B7.08c.1:exon:2-SPBC36B7.08c.1:three_prime_UTR:1	SPBC36B7.08c.1:exon:1	1041	1	0	0	1	0	0	0	0	0	0	0	0	0	0	0	0	0	0	0	0	0	1	0	0	0	0	0	0	0	0	0	0	0	0	0	0	0	0	0	0	0	0	0	0	0	0	1
SPBC25B2.01.1:exon:1-SPBC25B2.01.1:exon:3	SPBC25B2.01.1:exon:2	54	1	0	0	0	0	0	0	0	0	0	0	1	0	0	0	0	0	0	0	0	0	1	0	2	0	0	0	0	0	0	0	0	0	0	0	0	0	0	0	1	0	0	0	0	0	1	0
SPBC6B1.09c.1:exon:7-SPBC6B1.09c.1:exon:4	SPBC6B1.09c.1:exon:6;SPBC6B1.09c.1:exon:5	143	2	0	0	0	0	0	0	0	0	0	0	0	0	0	0	0	0	0	0	0	0	0	0	0	0	0	0	0	0	0	0	0	0	0	0	0	0	0	0	0	0	0	0	0	0	0	0
SPBC6B1.09c.1:exon:6-SPBC6B1.09c.1:exon:4	SPBC6B1.09c.1:exon:5	89	1	0	0	0	0	0	0	0	0	0	0	0	0	0	0	0	0	0	0	0	1	0	0	0	0	0	0	0	0	0	0	0	0	0	0	0	0	0	0	0	0	0	0	0	0	1	0
SPBC3E7.04c.1:exon:7-SPBC3E7.04c.1:exon:1	SPBC3E7.04c.1:exon:6;SPBC3E7.04c.1:exon:5;SPBC3E7.04c.1:exon:4;SPBC3E7.04c.1:exon:3;SPBC3E7.04c.1:exon:2	1253	5	0	0	0	0	0	0	0	0	0	0	0	0	0	0	0	0	0	0	0	0	0	0	0	0	0	0	0	0	0	0	0	0	0	0	0	0	0	0	0	0	0	0	0	1	3	1
SPBC3E7.04c.1:exon:5-SPBC3E7.04c.1:exon:3	SPBC3E7.04c.1:exon:4	137	1	0	0	0	0	0	0	0	0	0	0	0	0	0	0	0	0	0	0	0	0	0	0	0	0	0	0	0	0	0	0	0	0	0	0	0	0	1	0	0	0	0	0	0	0	1	0
SPBC336.13c.1:exon:3-SPBC336.13c.1:exon:1	SPBC336.13c.1:exon:2	150	1	1	0	0	0	0	0	0	0	0	1	1	1	0	0	0	0	0	0	0	0	0	0	0	0	0	0	0	0	0	0	0	0	0	0	0	0	0	1	1	0	4	0	0	0	0	0
SPBC336.14c.1:exon:11-SPBC336.14c.1:exon:9	SPBC336.14c.1:exon:10	41	1	1	1	0	0	0	0	0	0	0	0	0	0	2	0	0	0	1	0	0	0	0	0	0	0	1	0	0	0	0	0	0	0	2	1	0	0	0	1	0	2	4	0	0	1	1	4
SPBC19C7.10.1:exon:1-SPBC19C7.10.1:exon:3	SPBC19C7.10.1:exon:2	32	1	0	0	0	0	0	0	0	0	0	0	1	0	0	1	0	0	0	0	0	1	0	0	0	1	0	0	0	0	0	0	0	0	0	0	0	3	0	0	2	2	1	0	0	0	2	3
SPBC19C7.10.1:exon:1-SPBC19C7.10.1:exon:4	SPBC19C7.10.1:exon:2;SPBC19C7.10.1:exon:3	132	2	1	1	0	0	0	0	0	0	0	0	0	4	0	1	0	0	0	0	0	0	0	0	0	0	0	0	0	0	0	0	0	0	0	0	0	0	0	0	0	0	1	0	0	1	0	0
SPBC19C7.10.1:exon:1-SPBC19C7.10.1:exon:6	SPBC19C7.10.1:exon:2;SPBC19C7.10.1:exon:3;SPBC19C7.10.1:exon:4;SPBC19C7.10.1:exon:5	1233	4	1	0	2	0	0	0	1	0	0	1	1	0	0	0	0	0	0	0	0	0	1	0	0	0	0	0	0	0	0	0	0	0	0	0	0	0	0	1	1	1	0	0	0	0	3	1
SPBC19C7.10.1:exon:3-SPBC19C7.10.1:exon:6	SPBC19C7.10.1:exon:4;SPBC19C7.10.1:exon:5	1101	2	0	0	1	0	0	1	1	0	0	0	0	0	0	0	0	0	0	0	0	0	0	0	0	0	0	0	0	0	0	0	0	0	0	0	0	0	0	0	0	1	0	0	0	0	0	0
SPBP4H10.20.1:exon:1-SPBP4H10.20.1:exon:3	SPBP4H10.20.1:exon:2	206	1	0	0	0	0	0	0	0	0	0	0	0	0	0	0	0	0	0	0	0	0	0	0	0	0	0	0	0	0	0	0	0	0	0	0	0	0	0	0	0	0	0	0	0	0	0	0
SPBC1703.10.1:exon:1-SPBC1703.10.1:exon:3	SPBC1703.10.1:exon:2	124	1	0	0	0	0	0	0	0	0	0	0	0	0	0	0	0	0	0	0	0	0	0	0	0	0	0	0	0	0	0	0	0	0	0	0	0	0	0	0	0	0	1	0	0	0	0	0
SPBC2A9.11c.1:exon:3-SPBC2A9.11c.1:exon:1	SPBC2A9.11c.1:exon:2	130	1	0	0	0	0	0	0	0	0	0	0	0	0	0	0	0	0	0	0	0	0	0	0	0	0	0	0	0	0	0	0	0	0	0	0	0	0	0	0	0	0	0	0	0	0	0	0
SPBC2D10.15c.1:exon:3-SPBC2D10.15c.1:exon:1	SPBC2D10.15c.1:exon:2	46	1	0	1	1	0	0	0	0	0	0	2	1	2	1	0	0	1	0	0	0	0	0	0	0	0	0	0	0	0	0	0	4	0	1	0	0	0	0	0	0	2	0	0	0	0	1	0
SPBC2D10.20.1:exon:2-SPBC2D10.20.1:exon:4	SPBC2D10.20.1:exon:3	48	1	0	0	1	0	0	0	0	0	0	1	0	0	0	0	0	0	0	0	0	1	0	0	0	0	0	0	0	0	0	0	0	0	0	0	0	0	0	1	0	0	1	0	0	0	0	0
SPBC25H2.16c.1:exon:1-SPBC25H2.16c.1:exon:4	SPBC25H2.16c.1:exon:2;SPBC25H2.16c.1:exon:3	164	2	0	0	0	0	0	0	0	0	0	0	0	0	0	0	0	0	0	0	0	0	0	0	0	0	0	0	0	0	0	0	1	0	0	0	0	0	0	0	0	0	0	0	0	0	0	0
SPBC25H2.10c.1:exon:3-SPBC25H2.10c.1:exon:5	SPBC25H2.10c.1:exon:4	206	1	1	0	2	0	0	1	0	0	0	1	2	0	0	0	0	0	4	0	0	0	1	0	1	0	0	0	0	0	0	0	0	0	0	0	0	0	0	1	1	2	2	0	0	0	0	1
SPBC25H2.10c.1:exon:4-SPBC25H2.10c.1:exon:6	SPBC25H2.10c.1:exon:5	144	1	0	0	0	0	0	0	0	0	0	0	1	0	0	0	0	0	0	0	0	0	0	0	0	0	0	0	0	0	0	0	0	0	0	0	0	0	0	0	0	0	0	0	0	0	0	0
SPBC20F10.04c.1:exon:5-SPBC20F10.04c.1:exon:3	SPBC20F10.04c.1:exon:4	94	1	0	0	0	0	0	0	0	0	0	1	1	0	0	1	0	0	2	0	0	0	0	0	0	0	0	0	0	0	0	0	0	0	1	0	0	0	0	0	0	1	0	0	0	0	0	0
SPBC17D11.08.1:exon:1-SPBC17D11.08.1:exon:3	SPBC17D11.08.1:exon:2	234	1	0	0	0	0	0	0	0	0	0	0	1	0	0	0	0	0	0	0	0	1	0	0	0	0	0	0	0	0	0	0	0	0	0	0	0	0	0	0	0	0	0	0	0	0	0	0
SPBC11C11.01.1:exon:1-SPBC11C11.01.1:exon:3	SPBC11C11.01.1:exon:2	59	1	0	0	0	0	0	0	0	0	2	0	1	0	7	3	0	1	0	0	0	0	0	0	0	1	4	1	1	0	0	3	0	3	0	3	1	0	2	1	1	0	4	0	0	1	0	1
SPBC4B4.09.1:exon:2-SPBC4B4.09.1:exon:4	SPBC4B4.09.1:exon:3	104	1	0	1	0	0	0	0	0	0	0	0	0	0	0	0	0	0	0	0	0	0	0	0	0	0	0	0	0	0	0	0	0	0	0	0	1	0	0	1	0	0	0	0	0	0	0	0
SPBC2G2.06c.1:exon:5-SPBC2G2.06c.1:exon:3	SPBC2G2.06c.1:exon:4	46	1	1	0	0	0	0	0	0	0	0	0	0	1	0	0	0	0	1	1	0	1	1	0	0	0	0	0	0	0	0	0	0	0	0	0	0	0	0	0	0	2	1	0	0	0	3	2
SPBC887.06c.1:exon:4-SPBC887.06c.1:exon:2	SPBC887.06c.1:exon:3	66	1	0	0	0	0	0	0	0	0	0	0	0	0	0	1	0	0	0	0	0	0	0	0	0	0	0	0	0	0	0	0	0	0	0	1	0	0	0	0	0	2	1	0	0	0	0	0
SPBC16D10.07c.1:exon:4-SPBC16D10.07c.1:exon:2	SPBC16D10.07c.1:exon:3	32	1	0	0	0	0	0	0	0	0	0	0	1	0	1	0	1	1	1	1	0	0	0	0	0	0	0	0	0	0	0	0	0	0	0	0	0	0	0	0	0	1	0	0	0	0	0	0
SPBC16D10.07c.1:exon:4-SPBC16D10.07c.1:exon:1	SPBC16D10.07c.1:exon:3;SPBC16D10.07c.1:exon:2	469	2	0	0	0	0	0	0	0	0	0	0	0	0	0	0	0	0	0	0	0	0	0	0	0	0	0	0	0	0	0	0	0	0	0	0	0	0	0	0	0	0	0	0	0	0	1	0
SPBP8B7.08c.1:exon:3-SPBP8B7.08c.1:exon:1	SPBP8B7.08c.1:exon:2	269	1	1	0	0	0	0	0	0	0	0	1	0	0	0	1	0	1	1	0	0	0	0	0	0	0	1	0	0	0	0	0	0	0	0	0	0	0	0	0	0	1	4	0	0	0	0	0
SPBP8B7.24c.1:exon:3-SPBP8B7.24c.1:exon:1	SPBP8B7.24c.1:exon:2	56	1	0	0	0	0	0	0	0	0	0	0	0	0	0	1	0	0	0	0	0	0	0	0	0	0	1	0	0	0	0	0	0	0	0	2	4	0	0	1	0	0	1	0	0	0	1	0
SPBC13G1.12.1:exon:1-SPBC13G1.12.1:exon:3	SPBC13G1.12.1:exon:2	20	1	1	2	2	0	0	0	0	0	9	0	4	3	7	2	0	0	1	6	14	0	0	0	4	8	18	4	10	5	5	5	10	9	3	3	4	3	7	2	3	1	4	0	0	34	18	19
SPBC13G1.12.1:exon:1-SPBC13G1.12.1:exon:4	SPBC13G1.12.1:exon:2;SPBC13G1.12.1:exon:3	98	2	0	0	0	0	0	0	0	0	3	0	0	0	1	3	0	0	0	1	2	0	0	0	0	7	2	6	0	3	1	0	2	1	0	1	1	1	1	0	0	0	0	0	0	1	0	0
SPBC13G1.12.1:exon:1-SPBC13G1.12.1:exon:7	SPBC13G1.12.1:exon:2;SPBC13G1.12.1:exon:3;SPBC13G1.12.1:exon:4;SPBC13G1.12.1:exon:5;SPBC13G1.12.1:exon:6	386	5	0	0	0	0	0	0	0	0	0	0	0	0	0	0	0	0	0	0	0	0	0	0	0	0	0	0	0	0	0	0	0	0	0	0	0	0	0	0	0	0	0	0	0	0	0	0
SPBC13G1.12.1:exon:3-SPBC13G1.12.1:exon:7	SPBC13G1.12.1:exon:4;SPBC13G1.12.1:exon:5;SPBC13G1.12.1:exon:6	288	3	0	0	0	0	0	0	0	0	0	0	1	2	0	0	0	0	0	0	0	0	2	0	1	0	0	0	0	0	0	0	0	0	0	0	0	0	0	0	0	0	1	0	0	0	0	3
SPBC31F10.06c.1:exon:3-SPBC31F10.06c.1:exon:1	SPBC31F10.06c.1:exon:2	106	1	0	0	0	0	0	0	0	0	0	0	0	0	0	0	0	0	0	0	0	0	0	0	0	0	0	0	0	0	0	0	0	0	0	0	0	0	0	0	0	0	0	0	0	0	0	0
SPBC31F10.13c.1:exon:3-SPBC31F10.13c.1:exon:1	SPBC31F10.13c.1:exon:2	92	1	0	6	2	0	1	0	0	0	0	6	3	2	0	2	1	2	4	1	0	1	1	0	0	1	0	0	1	2	1	0	0	0	0	0	0	0	0	4	3	4	11	0	0	0	2	4
SPBC26H8.14c.1:exon:3-SPBC26H8.14c.1:exon:1	SPBC26H8.14c.1:exon:2	104	1	0	0	0	0	0	0	0	0	0	0	0	0	1	0	0	0	1	0	0	0	0	0	0	0	0	0	0	0	0	0	0	0	0	0	0	0	0	0	1	0	0	0	0	0	0	0
SPBC26H8.07c.1:exon:6-SPBC26H8.07c.1:exon:4	SPBC26H8.07c.1:exon:5	50	1	0	0	0	0	0	0	0	0	0	0	0	0	0	0	1	0	0	0	0	0	1	0	0	0	0	0	2	0	0	0	0	0	0	0	2	0	0	0	2	1	0	0	0	0	0	0
SPBC26H8.07c.1:exon:3-SPBC26H8.07c.1:exon:1	SPBC26H8.07c.1:exon:2	886	1	0	0	0	0	0	0	0	0	0	0	1	1	0	0	0	0	0	0	0	0	0	0	0	0	0	0	0	0	0	0	0	0	0	0	0	0	0	1	0	2	2	0	0	0	0	0
SPBC3B9.06c.1:exon:3-SPBC3B9.06c.1:exon:1	SPBC3B9.06c.1:exon:2	115	1	0	0	0	0	0	0	0	0	0	0	0	0	0	0	0	0	0	0	0	0	0	0	0	0	0	0	0	0	0	0	0	0	2	0	0	0	0	1	0	1	0	0	0	0	0	0
SPBC215.12.1:exon:2-SPBC215.12.1:exon:4	SPBC215.12.1:exon:3	352	1	0	0	0	0	0	0	0	0	0	0	0	0	0	0	0	0	1	1	0	1	0	0	0	0	0	0	0	0	0	0	0	0	0	0	0	0	0	1	0	0	0	0	0	0	0	0
SPBC16G5.05c.1:five_prime_UTR:2-SPBC16G5.05c.1:exon:1	SPBC16G5.05c.1:exon:2	205	1	0	1	0	0	0	0	0	0	6	0	0	0	0	0	0	0	1	0	0	0	0	0	0	0	0	0	0	0	0	0	0	0	1	0	0	0	0	0	0	0	0	0	0	17	0	0
SPBC16A3.09c.1:exon:2-SPBC16A3.09c.1:exon:5	SPBC16A3.09c.1:exon:3;SPBC16A3.09c.1:exon:4	155	2	0	0	0	0	0	0	0	0	0	0	0	0	0	0	0	0	0	0	0	0	0	0	0	0	0	0	0	0	0	0	0	0	0	0	0	0	0	0	0	0	0	0	0	0	0	0
SPBC543.06c.1:exon:3-SPBC543.06c.1:exon:1	SPBC543.06c.1:exon:2	124	1	0	0	0	0	0	0	0	0	0	0	0	0	0	0	0	0	0	0	0	0	0	0	0	0	0	0	0	0	0	0	0	0	0	1	0	0	0	1	0	1	0	0	0	0	0	0
SPBC16C6.07c.1:exon:3-SPBC16C6.07c.1:exon:1	SPBC16C6.07c.1:exon:2	82	1	0	0	0	0	0	0	0	0	1	0	0	0	0	0	0	0	0	0	0	0	0	0	0	0	0	0	0	0	0	0	0	0	0	0	0	0	0	0	0	0	0	0	0	0	0	0
SPBC1539.08.1:exon:1-SPBC1539.08.1:exon:3	SPBC1539.08.1:exon:2	31	1	0	0	0	0	0	0	0	0	0	0	0	0	4	1	0	0	0	0	0	0	0	0	0	0	2	3	2	3	0	0	0	0	2	0	1	0	0	0	0	0	0	0	0	0	0	0
SPBC1539.08.1:exon:1-SPBC1539.08.1:exon:4	SPBC1539.08.1:exon:2;SPBC1539.08.1:exon:3	104	2	0	0	0	0	0	0	0	0	1	0	1	0	0	0	0	1	0	0	0	0	1	0	0	0	0	0	0	0	0	0	0	0	0	0	1	0	2	2	1	0	0	0	0	0	1	0
SPBC1289.03c.1:exon:3-SPBC1289.03c.1:exon:1	SPBC1289.03c.1:exon:2	187	1	0	0	0	0	0	0	0	0	0	1	0	1	0	1	0	3	1	0	2	0	3	0	0	0	0	0	0	2	0	0	0	0	0	0	0	0	0	0	0	2	1	0	0	0	2	1
SPBC1289.11.1:exon:1-SPBC1289.11.1:exon:3	SPBC1289.11.1:exon:2	105	1	0	0	0	0	0	0	0	0	0	0	0	0	0	0	0	0	0	1	0	1	0	0	0	0	0	0	0	0	0	0	0	0	0	0	0	0	0	0	0	0	0	0	0	0	0	0
SPBC1289.11.1:exon:1-SPBC1289.11.1:exon:5	SPBC1289.11.1:exon:2;SPBC1289.11.1:exon:3;SPBC1289.11.1:exon:4	438	3	0	0	0	0	0	0	0	0	0	0	0	0	0	0	0	0	0	0	0	2	0	0	0	0	0	0	0	0	0	0	0	0	0	0	0	0	0	0	0	0	0	0	0	0	0	0
SPCC1235.10c.1:exon:5-SPCC1235.10c.1:exon:2	SPCC1235.10c.1:exon:4;SPCC1235.10c.1:exon:3	133	2	0	0	0	0	0	0	0	0	0	0	0	0	0	0	0	0	0	0	0	0	0	0	0	0	0	0	0	0	0	0	0	0	0	0	0	0	0	0	0	0	0	0	0	0	0	0
SPCC1235.11.1:exon:1-SPCC1235.11.1:exon:6	SPCC1235.11.1:exon:2;SPCC1235.11.1:exon:3;SPCC1235.11.1:exon:4;SPCC1235.11.1:exon:5	336	4	0	0	0	0	0	0	0	0	0	0	0	0	0	0	0	0	0	0	0	0	0	0	0	0	0	0	0	0	0	0	0	0	0	0	0	0	0	0	0	0	0	0	0	0	0	0
SPCC1235.11.1:exon:2-SPCC1235.11.1:exon:5	SPCC1235.11.1:exon:3;SPCC1235.11.1:exon:4	136	2	1	1	0	0	0	0	0	0	0	1	3	2	0	0	0	0	0	0	0	0	0	0	0	0	0	0	0	0	0	0	0	1	0	0	0	0	0	4	1	3	2	0	0	0	2	0
SPCC1235.11.1:exon:3-SPCC1235.11.1:exon:5	SPCC1235.11.1:exon:4	41	1	0	0	0	0	0	0	0	0	0	1	0	0	1	1	0	0	4	0	0	0	0	0	0	0	0	0	0	0	0	0	0	0	0	1	1	0	0	0	0	0	0	0	0	0	0	0
SPCC1235.11.1:exon:3-SPCC1235.11.1:exon:6	SPCC1235.11.1:exon:4;SPCC1235.11.1:exon:5	136	2	0	0	1	0	0	0	0	0	0	1	0	0	0	0	0	0	0	0	0	1	0	0	0	0	0	0	0	0	0	0	0	0	0	0	0	0	0	0	0	0	0	0	0	0	0	0
SPCC553.06.1:exon:3-SPCC553.06.1:exon:1	SPCC553.06.1:exon:2	199	1	0	0	0	0	0	0	0	0	0	0	0	1	0	0	0	1	0	0	0	0	0	0	0	0	0	0	0	0	0	0	0	0	0	0	0	0	0	1	0	0	1	0	0	0	0	0
SPCC4G3.15c.1:exon:1-SPCC4G3.15c.1:exon:3	SPCC4G3.15c.1:exon:2	397	1	0	0	0	0	0	0	0	0	0	0	0	0	0	0	0	0	0	0	0	1	0	0	0	0	2	0	2	0	0	0	0	1	0	0	0	0	2	2	0	0	1	0	0	0	1	1
SPCC970.04c.1:exon:1-SPCC970.04c.1:exon:3	SPCC970.04c.1:exon:2	94	1	0	1	0	0	0	0	0	0	0	1	0	0	0	0	0	0	0	0	0	0	0	0	0	0	0	0	0	0	0	0	0	0	0	0	0	0	0	0	0	0	0	0	0	0	0	0
SPCC970.12.1:exon:4-SPCC970.12.1:exon:2	SPCC970.12.1:exon:3	36	1	0	2	0	0	0	0	0	0	0	0	0	0	1	0	0	0	0	0	0	0	0	0	0	0	0	0	0	0	1	1	0	0	0	0	0	0	0	1	0	1	0	0	0	0	0	0
SPCC1183.03c.1:exon:3-SPCC1183.03c.1:exon:1	SPCC1183.03c.1:exon:2	95	1	0	0	0	0	0	0	0	0	0	0	0	0	0	0	0	0	0	0	0	0	0	0	0	0	0	0	0	0	0	0	0	0	0	0	0	0	0	0	0	0	0	0	0	0	0	0
SPCC16C4.06c.1:five_prime_UTR:2-SPCC16C4.06c.1:exon:1	SPCC16C4.06c.1:exon:2	1530	1	0	0	0	0	0	0	0	0	0	0	0	0	0	0	0	0	0	0	0	0	0	0	0	0	0	0	0	0	0	0	0	0	0	0	0	0	0	0	0	0	0	0	0	0	0	0
SPCC18B5.11c.1:exon:8-SPCC18B5.11c.1:exon:5	SPCC18B5.11c.1:exon:7;SPCC18B5.11c.1:exon:6	81	2	0	0	0	0	0	0	0	0	0	0	0	0	0	0	0	0	0	0	0	0	0	0	0	0	0	0	0	0	0	0	0	0	0	0	0	0	0	0	0	0	0	0	0	0	0	0
SPCC18B5.11c.1:exon:7-SPCC18B5.11c.1:exon:5	SPCC18B5.11c.1:exon:6	32	1	0	0	0	0	0	0	0	0	0	1	5	0	0	1	0	2	0	0	0	0	0	0	1	0	2	3	0	3	0	0	0	0	0	2	1	0	2	1	0	4	1	0	0	0	0	0
SPCC18B5.11c.1:exon:6-SPCC18B5.11c.1:exon:4	SPCC18B5.11c.1:exon:5	85	1	0	0	0	0	0	0	0	0	0	0	0	0	1	1	0	0	0	0	0	0	0	0	0	0	0	0	0	0	0	0	0	0	0	0	0	0	0	0	0	1	0	0	0	0	0	0
SPCC1020.11c.1:exon:1-SPCC1020.11c.1:exon:3	SPCC1020.11c.1:exon:2	256	1	0	0	0	0	0	0	0	0	0	0	0	0	0	0	0	0	0	0	0	0	0	0	0	0	0	0	0	0	0	0	0	0	0	0	0	0	0	0	0	0	0	0	0	0	0	0
SPCC1795.02c.1:five_prime_UTR:1-SPCC1795.02c.1:exon:2	SPCC1795.02c.1:exon:1	445	1	0	0	0	0	0	0	0	0	0	0	1	0	0	0	0	0	0	0	0	0	0	0	0	0	0	0	0	0	0	0	0	0	0	0	0	0	0	1	0	0	0	0	0	0	0	0
SPCC1322.09.1:exon:1-SPCC1322.09.1:exon:3	SPCC1322.09.1:exon:2	179	1	1	0	0	0	0	0	0	0	0	1	1	0	0	0	0	0	3	0	0	0	0	0	1	0	0	0	0	0	0	0	0	0	0	0	0	0	0	3	2	3	3	0	0	0	1	2
SPCC338.05c.1:exon:2-SPCC338.05c.1:exon:4	SPCC338.05c.1:exon:3	126	1	0	0	0	0	0	0	0	0	0	0	1	0	0	0	0	0	0	0	0	0	0	0	2	0	0	0	0	0	0	0	0	0	0	0	0	0	0	1	0	0	1	0	0	0	0	0
SPCC1442.10c.1:exon:3-SPCC1442.10c.1:exon:1	SPCC1442.10c.1:exon:2	50	1	0	1	0	0	0	0	0	0	0	0	1	0	3	1	0	1	0	1	0	0	0	0	0	0	2	5	0	2	4	2	0	0	0	0	0	0	1	0	0	2	1	0	0	0	0	1
SPCC285.08.1:exon:2-SPCC285.08.1:exon:4	SPCC285.08.1:exon:3	404	1	0	0	1	0	0	0	0	0	1	1	1	0	0	0	1	1	0	0	0	0	0	0	0	0	0	0	0	0	0	0	0	0	0	0	0	0	0	1	3	4	1	0	0	0	0	0
SPCC285.09c.1:exon:4-SPCC285.09c.1:exon:2	SPCC285.09c.1:exon:3	9	1	0	0	0	0	0	0	0	0	0	0	0	0	0	0	0	0	0	0	0	1	0	0	0	0	0	0	0	0	0	0	0	0	0	0	0	0	0	0	0	0	0	0	0	1	0	0
SPCC1223.01.1:exon:1-SPCC1223.01.1:exon:3	SPCC1223.01.1:exon:2	198	1	0	0	0	0	0	0	0	0	0	0	1	0	0	0	0	0	0	0	3	0	0	0	0	0	0	0	0	0	0	0	0	0	0	0	0	0	0	0	0	0	0	0	0	0	0	0
SPCC576.14.1:exon:2-SPCC576.14.1:exon:4	SPCC576.14.1:exon:3	132	1	1	2	0	0	0	0	0	0	0	1	3	4	1	1	3	4	5	0	0	0	0	0	1	0	0	0	0	2	0	1	0	0	0	0	3	3	0	2	1	3	3	0	0	0	0	2
SPCC1620.05.1:exon:3-SPCC1620.05.1:exon:5	SPCC1620.05.1:exon:4	188	1	0	0	3	0	0	0	0	0	0	0	0	1	0	0	0	1	0	0	0	0	1	0	0	0	0	0	0	0	0	0	0	0	0	0	0	0	0	0	1	0	0	0	0	0	1	2
SPCC830.10.1:exon:1-SPCC830.10.1:exon:3	SPCC830.10.1:exon:2	102	1	2	0	2	0	0	0	0	0	0	1	1	0	0	0	0	1	2	0	0	0	0	0	0	0	0	0	0	1	0	0	0	0	0	0	0	0	0	2	2	1	3	0	0	0	0	0
SPCC830.10.1:exon:1-SPCC830.10.1:exon:4	SPCC830.10.1:exon:2;SPCC830.10.1:exon:3	167	2	0	1	0	0	0	0	0	0	0	2	0	0	0	0	0	0	0	1	1	0	0	0	0	0	0	0	0	0	0	0	0	0	0	0	0	0	0	1	1	1	0	0	0	0	1	0
SPCC830.10.1:exon:2-SPCC830.10.1:exon:4	SPCC830.10.1:exon:3	65	1	0	0	0	0	0	0	0	0	0	0	0	0	0	0	0	0	0	0	0	0	0	0	0	0	0	0	0	0	0	0	0	0	0	0	0	0	0	0	0	0	0	0	0	0	0	0
SPCC790.03.1:exon:1-SPCC790.03.1:exon:3	SPCC790.03.1:exon:2	277	1	0	0	0	0	0	0	0	0	2	0	0	0	1	3	0	0	0	0	0	0	0	0	0	0	0	0	1	0	0	0	0	0	0	0	0	0	1	0	0	0	0	0	0	0	0	0
SPCC1494.02c.1:exon:3-SPCC1494.02c.1:exon:1	SPCC1494.02c.1:exon:2	98	1	0	0	0	0	0	0	0	0	0	2	1	0	1	0	0	5	0	0	0	0	0	0	0	0	0	0	2	0	5	0	0	0	0	0	0	0	0	3	1	0	2	0	0	0	0	0
SPCC613.08.1:exon:1-SPCC613.08.1:exon:3	SPCC613.08.1:exon:2	212	1	0	0	0	0	0	0	0	0	0	0	0	0	0	0	0	0	0	0	0	0	0	0	0	0	0	0	0	0	0	0	0	0	0	0	0	0	0	0	0	0	0	0	0	0	0	0
SPCC320.11c.1:exon:1-SPCC320.11c.1:exon:3	SPCC320.11c.1:exon:2	87	1	0	0	0	0	0	0	0	0	1	0	0	0	0	0	0	0	0	0	0	0	0	0	0	0	0	0	0	0	0	0	0	0	0	0	0	0	0	0	2	0	0	0	0	0	0	0
SPCC320.04c.1:exon:1-SPCC320.04c.1:exon:3	SPCC320.04c.1:exon:2	76	1	0	0	0	0	0	0	0	0	0	0	0	0	0	0	0	0	0	0	0	1	0	0	0	0	0	0	0	0	0	0	0	0	0	0	0	0	0	0	0	0	0	0	0	0	0	0
SPCC320.04c.1:exon:9-SPCC320.04c.1:exon:13	SPCC320.04c.1:exon:10;SPCC320.04c.1:exon:11;SPCC320.04c.1:exon:12	312	3	0	0	0	0	0	0	0	0	0	0	0	0	0	0	0	0	0	0	0	0	0	0	0	0	0	0	0	0	0	0	0	0	0	0	0	0	0	0	0	0	0	0	0	0	0	0
SPCC1529.01.1:exon:1-SPCC1529.01.1:exon:3	SPCC1529.01.1:exon:2	106	1	1	1	0	0	0	0	0	0	0	0	1	0	0	0	0	0	0	0	0	0	0	0	0	0	2	0	0	0	0	0	0	0	0	0	0	0	0	0	0	2	0	0	0	0	0	0
SPCC553.07c.1:exon:2-SPCC553.07c.1:exon:4	SPCC553.07c.1:exon:3	513	1	0	0	0	0	0	0	0	0	0	0	0	0	0	0	0	0	0	0	0	0	0	0	0	0	0	0	0	0	0	0	0	0	0	0	0	0	0	0	0	0	0	0	0	0	0	0
SPCC4G3.02.1:exon:3-SPCC4G3.02.1:exon:1	SPCC4G3.02.1:exon:2	87	1	0	0	0	0	0	0	0	0	0	0	0	0	0	0	0	0	0	0	0	0	0	0	0	0	0	0	0	0	0	0	0	0	0	0	0	0	0	0	0	0	0	0	0	0	0	0
SPCC970.09.1:exon:8-SPCC970.09.1:exon:6	SPCC970.09.1:exon:7	50	1	0	0	0	0	0	0	0	0	0	0	0	0	0	0	0	0	0	0	0	0	0	0	0	0	0	0	0	0	0	0	0	0	0	0	0	0	0	1	0	0	0	0	0	0	0	1
SPCC970.09.1:exon:3-SPCC970.09.1:exon:1	SPCC970.09.1:exon:2	231	1	0	0	0	0	0	0	0	0	0	0	0	0	0	0	0	2	0	0	0	0	0	0	0	0	0	0	0	0	0	0	0	0	0	0	0	0	0	0	0	0	0	0	0	0	0	0
SPCC1672.04c.1:exon:3-SPCC1672.04c.1:exon:1	SPCC1672.04c.1:exon:2	69	1	0	0	0	0	0	0	0	0	0	0	2	0	0	0	0	0	0	0	0	0	0	0	0	0	0	0	0	0	0	0	0	0	0	0	0	1	0	0	0	0	0	0	0	0	0	0
SPCC1672.10.1:exon:1-SPCC1672.10.1:exon:3	SPCC1672.10.1:exon:2	106	1	0	0	0	1	0	0	0	0	0	0	0	0	0	0	0	1	0	0	0	0	0	0	0	0	0	0	0	0	0	0	0	0	0	0	0	0	0	1	0	2	0	0	0	0	0	0
SPCC1672.12c.1:exon:3-SPCC1672.12c.1:exon:1	SPCC1672.12c.1:exon:2	386	1	0	0	0	0	0	0	0	0	0	0	0	0	0	0	0	0	0	0	0	0	0	0	0	0	0	0	0	0	0	0	0	0	0	0	0	0	0	0	0	0	0	0	0	0	0	0
SPCC1183.01.1:exon:1-SPCC1183.01.1:exon:4	SPCC1183.01.1:exon:2;SPCC1183.01.1:exon:3	282	2	0	0	0	0	0	0	0	0	0	0	1	0	0	0	0	0	0	0	0	0	0	0	0	0	0	0	0	0	0	0	0	0	0	0	0	0	0	0	0	0	1	0	0	0	0	0
SPCC1183.05c.1:exon:10-SPCC1183.05c.1:exon:8	SPCC1183.05c.1:exon:9	100	1	0	0	3	0	0	0	0	0	0	3	1	0	3	10	0	1	2	2	2	0	0	0	0	0	3	1	1	2	0	2	0	0	0	2	1	1	0	4	2	2	4	0	0	0	0	0
SPCC5E4.03c.1:exon:4-SPCC5E4.03c.1:exon:1	SPCC5E4.03c.1:exon:3;SPCC5E4.03c.1:exon:2	434	2	1	0	0	0	0	0	0	0	0	0	0	0	0	0	0	0	0	0	0	0	0	0	0	0	0	0	0	0	0	0	0	0	0	0	0	0	0	0	0	0	0	0	0	0	0	0
SPCC16C4.01.1:exon:2-SPCC16C4.01.1:exon:4	SPCC16C4.01.1:exon:3	62	1	0	0	0	0	0	0	0	0	0	0	0	0	0	0	0	0	0	0	0	0	0	0	0	0	0	0	0	0	0	0	0	0	0	1	0	0	0	0	0	0	2	0	0	0	0	0
SPCC18B5.10c.1:exon:3-SPCC18B5.10c.1:exon:1	SPCC18B5.10c.1:exon:2	79	1	0	0	0	0	0	0	0	0	0	0	0	0	0	0	0	1	0	0	0	0	0	0	0	0	0	0	1	0	0	0	0	0	0	0	0	0	0	0	0	0	0	0	0	0	0	0
SPCC1393.09c.1:exon:3-SPCC1393.09c.1:exon:1	SPCC1393.09c.1:exon:2	137	1	0	0	0	0	0	0	0	0	0	0	0	0	0	0	0	0	0	0	0	2	0	0	0	0	0	0	0	0	0	1	0	0	0	0	0	0	0	0	0	1	0	0	0	0	0	0
SPCC16A11.05c.1:exon:5-SPCC16A11.05c.1:exon:2	SPCC16A11.05c.1:exon:4;SPCC16A11.05c.1:exon:3	67	2	1	0	0	0	0	0	0	0	0	0	1	1	0	0	0	0	0	0	1	0	0	0	0	0	0	0	0	0	0	0	0	0	0	0	0	0	0	0	0	0	0	0	0	0	0	0
SPCC825.05c.1:exon:4-SPCC825.05c.1:exon:2	SPCC825.05c.1:exon:3	90	1	1	1	0	0	0	0	0	0	3	1	0	0	3	1	0	2	0	1	2	0	0	0	0	0	1	1	0	0	0	3	0	1	0	2	0	0	0	1	0	2	3	0	0	0	0	0
SPCC4E9.01c.1:exon:9-SPCC4E9.01c.1:exon:7	SPCC4E9.01c.1:exon:8	113	1	0	0	0	0	0	0	0	0	0	0	0	0	0	0	0	0	0	0	0	0	0	0	0	0	0	0	0	0	0	0	0	0	0	0	0	0	0	0	0	0	1	0	0	0	0	0
SPCC23B6.01c.1:exon:4-SPCC23B6.01c.1:exon:2	SPCC23B6.01c.1:exon:3	32	1	0	4	1	0	1	0	0	0	0	2	0	0	0	1	3	0	2	0	0	0	0	0	0	0	0	0	0	0	0	0	0	0	0	0	0	0	0	2	0	1	1	0	0	1	2	3
SPCC23B6.01c.1:exon:4-SPCC23B6.01c.1:exon:1	SPCC23B6.01c.1:exon:3;SPCC23B6.01c.1:exon:2	110	2	2	4	0	0	0	0	1	0	0	1	1	2	0	0	2	3	3	0	1	0	0	0	1	0	0	0	0	0	0	0	0	0	0	0	0	0	0	1	2	2	2	0	0	0	1	0
SPCC1322.16.1:exon:1-SPCC1322.16.1:exon:3	SPCC1322.16.1:exon:2	267	1	0	0	0	0	0	0	0	0	2	1	0	1	0	0	0	0	0	0	0	0	1	0	0	0	0	0	0	0	0	0	0	0	0	0	0	0	0	0	1	1	0	0	0	0	0	0
SPCC622.14.1:exon:1-SPCC622.14.1:exon:3	SPCC622.14.1:exon:2	78	1	1	0	1	0	0	0	0	0	1	1	0	0	0	0	0	2	3	1	0	0	0	0	1	4	0	3	0	0	2	0	0	0	1	2	1	0	0	6	4	3	2	0	0	0	0	0
SPCC622.14.1:exon:1-SPCC622.14.1:exon:4	SPCC622.14.1:exon:2;SPCC622.14.1:exon:3	507	2	0	0	1	0	0	0	0	0	0	0	0	0	0	0	0	0	1	0	0	0	0	0	1	0	0	0	0	0	0	0	0	0	0	0	0	0	0	0	0	2	0	0	0	0	0	0
SPCC622.17.1:pseudogenic_exon:1-SPCC622.17.1:pseudogenic_exon:3	SPCC622.17.1:pseudogenic_exon:2	255	1	0	0	0	0	0	0	0	0	0	0	0	0	0	0	0	0	0	0	0	0	0	0	0	0	0	0	0	0	0	0	0	0	0	0	0	0	0	0	0	0	0	0	0	0	0	0
SPCC584.05.1:exon:1-SPCC584.05.1:exon:3	SPCC584.05.1:exon:2	41	1	1	2	0	0	0	0	0	0	0	1	1	1	0	0	0	1	3	0	0	0	1	0	2	0	0	0	0	0	0	0	0	0	0	0	0	0	0	4	5	5	3	0	0	0	2	3
SPCC777.10c.1:exon:5-SPCC777.10c.1:exon:3	SPCC777.10c.1:exon:4	96	1	0	0	0	0	0	0	0	0	0	0	0	0	0	0	0	0	1	0	0	0	1	0	0	0	0	0	0	0	0	0	0	0	0	0	0	0	0	0	0	0	0	0	0	0	0	0
SPCC777.10c.1:exon:4-SPCC777.10c.1:exon:2	SPCC777.10c.1:exon:3	89	1	0	0	0	0	0	0	0	0	0	0	1	0	0	0	2	0	0	0	0	0	0	0	0	0	0	0	0	0	0	0	0	0	0	0	0	0	0	1	0	0	2	0	0	0	0	0
SPCC777.17c.1:exon:3-SPCC777.17c.1:exon:1	SPCC777.17c.1:exon:2	76	1	0	0	0	0	0	0	0	0	0	0	0	0	0	0	0	0	0	0	0	0	0	0	0	0	0	0	1	0	0	0	0	0	0	0	0	0	0	0	0	0	0	0	0	0	0	0
SPCC663.02.1:exon:2-SPCC663.02.1:exon:4	SPCC663.02.1:exon:3	252	1	0	0	0	0	0	0	0	0	0	1	1	0	0	0	0	0	0	0	0	0	0	0	2	0	0	2	0	0	0	0	0	0	0	0	0	0	0	0	0	0	1	0	0	0	0	0
SPCC663.17.1:exon:3-SPCC663.17.1:exon:5	SPCC663.17.1:exon:4	57	1	0	0	0	0	0	0	0	0	0	0	0	0	0	0	0	0	0	0	0	0	0	0	0	0	0	0	0	0	0	0	0	0	0	0	0	0	0	0	0	0	0	0	0	0	0	0
SPCC663.18.1:exon:3-SPCC663.18.1:exon:1	SPCC663.18.1:exon:2	32	1	1	1	0	0	0	0	0	0	1	4	0	1	6	3	0	3	2	1	0	2	3	0	0	1	5	2	1	1	0	0	1	0	0	0	1	0	0	0	3	3	1	0	0	3	3	8
SPCC1442.06.1:exon:1-SPCC1442.06.1:exon:4	SPCC1442.06.1:exon:2;SPCC1442.06.1:exon:3	259	2	1	0	0	0	0	0	0	0	0	1	0	0	0	0	1	0	2	0	0	0	1	0	2	0	0	0	0	0	0	0	0	0	0	0	0	0	0	1	1	2	1	0	0	0	1	0
SPCC1739.09c.1:exon:6-SPCC1739.09c.1:exon:3	SPCC1739.09c.1:exon:5;SPCC1739.09c.1:exon:4	75	2	0	0	0	0	0	0	0	0	0	0	0	0	0	0	0	0	0	0	0	0	0	0	2	0	0	0	0	0	0	0	0	0	0	0	0	0	0	0	0	0	0	0	0	0	1	0
SPCC1739.09c.1:exon:6-SPCC1739.09c.1:exon:1	SPCC1739.09c.1:exon:5;SPCC1739.09c.1:exon:4;SPCC1739.09c.1:exon:3;SPCC1739.09c.1:exon:2	190	4	0	0	0	0	0	0	0	0	0	0	0	0	0	0	0	1	0	0	0	1	1	0	0	0	0	0	0	0	0	0	0	0	0	0	0	0	0	0	0	0	0	0	0	0	0	0
SPCC1739.09c.1:exon:3-SPCC1739.09c.1:exon:1	SPCC1739.09c.1:exon:2	60	1	0	0	0	0	0	0	0	0	0	0	0	0	0	0	0	0	0	1	0	0	0	0	0	0	0	0	0	0	0	0	0	0	0	0	0	0	0	1	0	1	2	0	0	0	0	0
SPCC576.05.1:exon:1-SPCC576.05.1:exon:3	SPCC576.05.1:exon:2	244	1	0	0	0	0	0	0	0	0	6	0	0	0	12	6	0	0	0	1	5	0	0	0	0	3	2	3	14	5	3	3	1	2	1	0	3	4	1	2	0	1	0	0	0	7	0	0
SPCC126.02c.1:exon:6-SPCC126.02c.1:exon:4	SPCC126.02c.1:exon:5	183	1	0	0	0	0	0	0	0	0	0	0	0	0	0	0	0	0	2	0	0	0	0	0	0	0	0	0	0	0	0	0	0	0	0	0	0	0	0	0	0	0	0	0	0	0	0	0
SPCC126.06.1:exon:1-SPCC126.06.1:exon:3	SPCC126.06.1:exon:2	78	1	1	0	0	0	0	0	0	0	5	0	1	0	0	0	0	0	0	2	3	0	0	0	0	3	3	0	3	0	3	5	0	4	0	1	0	0	0	0	1	1	3	0	0	5	0	0
SPCC126.06.1:exon:1-SPCC126.06.1:exon:7	SPCC126.06.1:exon:2;SPCC126.06.1:exon:3;SPCC126.06.1:exon:4;SPCC126.06.1:exon:5;SPCC126.06.1:exon:6	830	5	0	0	0	0	0	0	0	0	0	0	0	0	0	0	0	0	0	0	0	0	0	0	0	0	0	0	0	0	0	0	0	0	0	0	0	0	0	0	0	0	0	0	0	0	0	0
SPCC126.06.1:exon:3-SPCC126.06.1:exon:5	SPCC126.06.1:exon:4	129	1	0	0	0	0	0	0	0	0	0	0	0	0	0	2	0	0	0	1	0	0	0	0	0	0	0	0	1	1	1	0	0	0	0	0	0	2	0	0	0	1	0	0	0	0	0	0
SPCC126.06.1:exon:3-SPCC126.06.1:exon:6	SPCC126.06.1:exon:4;SPCC126.06.1:exon:5	265	2	0	0	0	0	0	0	0	0	0	0	0	0	0	0	0	0	0	0	0	0	0	0	0	0	0	0	0	0	0	0	0	0	0	0	0	0	0	0	0	0	0	0	0	0	0	0
SPCC126.06.1:exon:3-SPCC126.06.1:exon:7	SPCC126.06.1:exon:4;SPCC126.06.1:exon:5;SPCC126.06.1:exon:6	384	3	0	0	0	0	0	0	0	0	0	0	0	0	0	0	1	0	0	0	0	0	0	0	0	0	0	0	0	0	0	0	0	0	0	0	0	0	0	0	0	0	0	0	0	0	0	0
SPCC126.11c.1:exon:3-SPCC126.11c.1:exon:1	SPCC126.11c.1:exon:2	65	1	1	0	0	0	0	0	0	0	5	0	0	1	4	5	0	0	0	1	0	0	0	0	0	0	5	0	1	0	0	3	1	3	1	5	2	4	1	2	1	1	1	0	0	3	0	0
SPCC126.12.1:exon:1-SPCC126.12.1:exon:3	SPCC126.12.1:exon:2	315	1	0	0	0	0	0	0	0	0	0	0	0	0	0	0	0	0	0	0	0	1	0	0	0	0	0	0	0	0	0	0	0	0	0	0	0	0	0	0	0	0	0	0	0	0	0	0
SPCC1620.06c.1:exon:3-SPCC1620.06c.1:exon:1	SPCC1620.06c.1:exon:2	367	1	0	0	0	0	0	0	0	0	0	0	0	0	0	0	0	0	0	0	0	0	0	0	0	0	0	0	1	0	0	0	0	0	0	0	0	0	0	0	0	2	0	0	0	0	0	0
SPCC830.06.1:exon:1-SPCC830.06.1:exon:3	SPCC830.06.1:exon:2	237	1	1	0	1	0	0	0	0	0	0	0	0	0	0	0	0	0	0	0	0	0	0	0	1	0	0	0	0	0	0	0	0	0	0	0	0	0	0	0	1	3	0	0	0	0	0	1
SPCC830.06.1:exon:1-SPCC830.06.1:exon:4	SPCC830.06.1:exon:2;SPCC830.06.1:exon:3	350	2	0	0	0	0	0	0	0	0	0	0	0	0	0	0	0	0	0	0	0	0	1	0	1	0	0	0	0	0	2	0	0	0	0	0	0	0	0	0	0	1	0	0	0	0	0	0
SPCC1840.04.1:exon:1-SPCC1840.04.1:exon:3	SPCC1840.04.1:exon:2	60	1	0	0	0	0	0	0	0	0	0	0	0	0	2	1	0	0	0	0	0	0	0	0	0	0	0	0	0	0	0	0	0	0	0	0	0	0	0	0	1	0	1	0	0	0	0	0
SPCC1840.04.1:exon:3-SPCC1840.04.1:exon:5	SPCC1840.04.1:exon:4	24	1	0	3	1	0	0	0	0	0	0	3	1	0	2	3	1	2	5	0	0	0	0	0	0	0	4	1	1	0	1	5	2	7	1	2	4	2	0	2	1	1	1	0	0	0	0	1
SPCP1E11.02.1:exon:1-SPCP1E11.02.1:exon:3	SPCP1E11.02.1:exon:2	131	1	0	0	0	0	0	0	0	0	0	0	0	0	1	0	0	0	1	1	0	0	0	0	0	0	0	0	0	0	0	0	0	0	0	0	0	0	0	0	0	1	3	0	0	0	0	0
SPAC630.03.1:exon:1-SPAC630.03.1:exon:5	SPAC630.03.1:exon:2;SPAC630.03.1:exon:3;SPAC630.03.1:exon:4	1153	3	1	0	0	0	0	0	0	0	0	0	0	0	0	0	0	0	0	0	0	0	0	0	0	0	0	0	0	0	0	0	0	0	0	0	0	0	0	0	0	0	0	0	0	0	0	0
SPAC630.03.1:exon:3-SPAC630.03.1:exon:5	SPAC630.03.1:exon:4	600	1	0	1	0	0	0	0	0	0	0	0	1	0	0	0	0	0	0	0	0	0	0	0	1	0	0	0	0	0	0	0	0	0	0	0	0	0	0	0	2	0	0	0	0	0	0	0
SPAC31A2.05c.1:exon:4-SPAC31A2.05c.1:exon:1	SPAC31A2.05c.1:exon:3;SPAC31A2.05c.1:exon:2	793	2	0	0	0	0	0	0	0	0	0	0	0	0	0	0	0	0	0	0	0	0	0	0	0	0	0	0	0	0	0	0	0	0	0	0	0	0	0	0	0	0	0	0	0	0	0	1
SPAC31A2.10.1:exon:3-SPAC31A2.10.1:exon:5	SPAC31A2.10.1:exon:4	193	1	0	0	0	0	0	0	0	0	0	0	0	0	0	0	0	0	0	0	0	0	0	0	0	0	0	0	0	0	0	0	0	0	0	0	0	0	0	0	0	0	0	0	0	0	0	0
SPAC13A11.04c.1:exon:5-SPAC13A11.04c.1:exon:3	SPAC13A11.04c.1:exon:4	688	1	0	1	0	0	0	0	0	0	0	0	0	0	0	0	0	0	0	0	0	0	0	0	0	0	0	0	0	0	0	0	0	0	0	0	0	0	0	0	0	0	0	0	0	0	0	0
SPAC22F3.05c.1:exon:4-SPAC22F3.05c.1:exon:6	SPAC22F3.05c.1:exon:5	81	1	1	0	0	0	0	0	0	0	1	2	1	0	0	1	1	0	0	0	0	0	0	0	0	0	0	0	0	0	0	0	0	0	0	1	0	0	0	1	3	0	0	0	0	0	1	1
SPAC22F3.05c.1:exon:4-SPAC22F3.05c.1:three_prime_UTR:2	SPAC22F3.05c.1:exon:5;SPAC22F3.05c.1:exon:6	3607	2	0	0	0	0	0	0	0	0	0	0	0	0	0	0	0	0	0	0	0	0	0	0	0	0	0	0	0	0	0	0	0	0	0	0	0	0	0	0	1	1	0	0	0	0	0	0
SPAC22F3.03c.1:exon:6-SPAC22F3.03c.1:exon:13	SPAC22F3.03c.1:exon:7;SPAC22F3.03c.1:exon:8;SPAC22F3.03c.1:exon:9;SPAC22F3.03c.1:exon:10;SPAC22F3.03c.1:exon:11;SPAC22F3.03c.1:exon:12	1142	6	0	0	0	0	0	0	0	0	0	0	0	0	0	0	0	0	0	0	0	0	0	0	0	0	0	0	0	0	0	0	0	0	0	0	0	0	0	0	0	0	0	0	0	0	0	0
SPAC1296.01c.1:exon:6-SPAC1296.01c.1:exon:2	SPAC1296.01c.1:exon:5;SPAC1296.01c.1:exon:4;SPAC1296.01c.1:exon:3	664	3	0	0	1	0	0	0	0	0	0	0	0	0	0	0	0	0	0	0	0	0	0	0	0	0	0	0	0	0	0	0	0	0	0	0	0	0	0	0	0	0	0	0	0	0	0	0
SPAC1296.01c.1:exon:5-SPAC1296.01c.1:exon:2	SPAC1296.01c.1:exon:4;SPAC1296.01c.1:exon:3	578	2	0	1	0	0	0	0	0	0	0	0	0	0	0	0	0	0	0	0	0	0	0	0	0	0	0	0	0	0	0	0	0	0	0	0	0	0	0	0	0	0	0	0	0	0	0	0
SPAC22G7.02.1:exon:2-SPAC22G7.02.1:exon:7	SPAC22G7.02.1:exon:3;SPAC22G7.02.1:exon:4;SPAC22G7.02.1:exon:5;SPAC22G7.02.1:exon:6	2541	4	1	0	0	0	0	0	0	0	0	0	0	0	0	0	0	0	0	0	0	0	0	0	0	0	0	0	0	0	0	0	0	0	0	0	0	0	0	0	0	0	0	0	0	0	0	0
SPAC22G7.02.1:exon:5-SPAC22G7.02.1:exon:7	SPAC22G7.02.1:exon:6	96	1	1	0	0	0	0	0	0	0	0	0	0	0	0	0	0	0	0	0	0	0	0	0	0	0	0	0	0	0	0	0	0	0	0	0	0	0	0	0	0	0	0	0	0	0	0	0
SPNCRNA.159.1:exon:1-SPNCRNA.159.1:exon:3	SPNCRNA.159.1:exon:2	170	1	0	0	0	0	0	0	0	0	0	0	0	0	0	0	0	0	0	0	0	0	0	0	0	0	0	0	0	0	0	0	0	0	0	0	0	0	0	0	0	0	0	0	0	0	0	0
SPAC1687.13c.1:exon:3-SPAC1687.13c.1:exon:1	SPAC1687.13c.1:exon:2	646	1	0	1	0	0	0	0	0	0	0	0	0	0	0	0	0	0	0	0	0	0	0	0	0	0	0	0	0	0	0	0	0	0	0	0	0	0	0	0	0	0	0	0	0	0	0	0
SPAC1687.21.1:exon:1-SPAC1687.21.1:exon:4	SPAC1687.21.1:exon:2;SPAC1687.21.1:exon:3	189	2	0	0	0	0	0	0	0	0	0	1	0	0	0	0	0	0	0	0	0	0	0	0	0	0	0	0	0	0	0	0	0	0	0	0	0	0	0	0	0	0	0	0	0	3	0	0
SPAC1687.21.1:exon:2-SPAC1687.21.1:exon:5	SPAC1687.21.1:exon:3;SPAC1687.21.1:exon:4	88	2	1	1	3	0	0	0	0	0	0	3	2	0	0	0	3	1	1	0	0	0	0	0	3	0	0	0	0	0	0	0	0	0	0	0	0	0	0	1	5	5	0	0	0	0	1	1
SPAC222.18.1:exon:1-SPAC222.18.1:exon:3	SPAC222.18.1:exon:2	57	1	0	0	0	0	0	0	0	0	0	0	0	0	1	0	0	0	0	0	0	0	0	0	1	0	0	0	0	0	0	0	0	0	0	0	0	0	0	0	0	1	1	0	0	0	0	0
SPAC222.16c.1:exon:4-SPAC222.16c.1:exon:2	SPAC222.16c.1:exon:3	90	1	0	1	1	0	0	0	0	0	0	0	2	0	4	2	1	2	0	0	0	0	0	0	0	1	0	0	1	1	2	1	1	1	1	3	0	1	2	1	0	0	8	0	0	0	0	0
SPAC23C4.09c.1:exon:5-SPAC23C4.09c.1:exon:2	SPAC23C4.09c.1:exon:4;SPAC23C4.09c.1:exon:3	146	2	0	0	0	0	0	0	0	0	0	0	0	0	0	0	1	0	0	0	0	0	0	0	0	0	0	0	0	0	0	0	0	0	0	0	0	0	0	0	0	0	0	0	0	0	0	0
SPAC23C4.09c.1:exon:4-SPAC23C4.09c.1:exon:2	SPAC23C4.09c.1:exon:3	76	1	1	0	0	0	0	0	0	0	0	0	0	0	0	0	0	0	0	0	0	0	0	0	0	0	0	0	0	0	0	0	0	0	0	0	0	0	0	0	1	0	0	0	0	0	0	0
SPAC30D11.03.1:exon:3-SPAC30D11.03.1:exon:1	SPAC30D11.03.1:exon:2	121	1	0	1	0	0	0	0	0	0	0	0	0	0	0	0	0	0	0	0	0	0	0	0	0	0	0	0	0	0	0	0	0	0	0	0	0	0	0	0	0	1	0	0	0	0	0	0
SPAC56F8.05c.1:exon:5-SPAC56F8.05c.1:exon:2	SPAC56F8.05c.1:exon:4;SPAC56F8.05c.1:exon:3	216	2	1	0	0	0	0	0	0	0	0	0	0	1	0	0	0	0	1	0	0	0	0	0	0	0	0	0	0	0	0	0	0	0	0	0	0	0	0	0	0	0	0	0	0	0	0	0
SPAC56F8.05c.1:exon:3-SPAC56F8.05c.1:exon:1	SPAC56F8.05c.1:exon:2	208	1	0	1	0	0	0	0	0	0	0	0	0	0	0	0	0	0	0	0	0	0	0	0	0	0	0	0	0	0	0	0	1	0	0	0	0	0	0	1	0	0	1	0	0	0	0	0
SPAC6F12.13c.1:five_prime_UTR:1-SPAC6F12.13c.1:exon:1	SPAC6F12.13c.1:exon:2	120	1	0	0	0	0	0	0	0	0	1	0	0	0	0	0	0	0	0	0	0	0	0	0	0	0	0	0	0	0	0	0	0	0	0	0	0	0	0	0	0	0	0	0	1	0	0	1
SPAC23H4.18c.1:exon:2-SPAC23H4.18c.1:exon:4	SPAC23H4.18c.1:exon:3	91	1	0	0	0	0	0	0	0	0	0	0	0	0	2	2	0	0	0	2	0	0	0	0	0	0	2	0	2	0	0	5	0	0	0	0	4	0	0	0	0	1	0	0	0	0	0	0
SPAC23H4.16c.1:exon:2-SPAC23H4.16c.1:exon:4	SPAC23H4.16c.1:exon:3	192	1	0	0	1	0	0	0	0	0	0	0	0	0	1	0	0	0	0	0	0	0	0	0	0	0	0	1	0	0	0	0	0	0	0	0	0	4	0	0	0	0	0	0	0	0	0	0
SPAP27G11.05c.1:exon:5-SPAP27G11.05c.1:exon:1	SPAP27G11.05c.1:exon:4;SPAP27G11.05c.1:exon:3;SPAP27G11.05c.1:exon:2	2215	3	0	0	0	0	0	0	0	0	0	0	0	0	0	0	0	0	0	0	0	0	0	0	0	0	0	0	0	0	0	0	0	0	0	0	0	0	0	0	0	0	1	0	0	0	0	0
SPAC824.09c.1:exon:3-SPAC824.09c.1:exon:1	SPAC824.09c.1:exon:2	45	1	0	1	0	0	0	0	0	0	0	1	1	0	0	0	0	0	0	0	0	0	0	0	0	0	0	0	0	0	0	0	0	0	0	0	0	0	0	1	0	0	1	0	0	0	0	0
SPAPB1A10.10c.1:exon:3-SPAPB1A10.10c.1:exon:1	SPAPB1A10.10c.1:exon:2	99	1	0	0	0	0	0	0	0	0	0	0	0	0	0	0	0	0	0	0	0	0	0	0	0	0	0	0	0	0	0	0	0	0	0	0	0	0	0	0	0	0	0	0	0	0	0	0
SPAC3H1.13.1:exon:2-SPAC3H1.13.1:exon:4	SPAC3H1.13.1:exon:3	206	1	0	0	0	0	0	0	0	0	0	0	0	0	0	0	0	0	0	0	0	0	0	0	0	0	0	0	0	0	0	0	0	0	0	0	0	0	0	0	0	0	0	0	0	0	0	0
SPAC9G1.05.1:exon:3-SPAC9G1.05.1:exon:5	SPAC9G1.05.1:exon:4	46	1	0	0	0	0	0	0	0	0	0	0	0	0	0	0	0	0	0	0	0	0	0	0	0	0	0	0	0	0	0	0	0	0	0	0	0	0	0	0	0	0	1	0	0	0	0	1
SPAC23C11.10.1:exon:2-SPAC23C11.10.1:exon:4	SPAC23C11.10.1:exon:3	199	1	0	0	0	0	0	0	0	0	0	0	0	0	0	0	0	0	1	0	0	0	0	0	0	0	0	0	0	0	0	0	0	0	0	0	0	0	0	0	0	0	0	0	0	0	0	0
SPAC17G8.04c.1:exon:4-SPAC17G8.04c.1:exon:2	SPAC17G8.04c.1:exon:3	73	1	1	0	1	0	0	0	0	0	0	0	0	0	0	2	0	0	0	0	0	0	0	0	0	0	0	0	0	0	0	0	0	0	0	0	3	0	0	0	0	0	0	0	0	0	0	0
SPAC17G8.04c.1:exon:3-SPAC17G8.04c.1:exon:1	SPAC17G8.04c.1:exon:2	177	1	0	0	0	0	0	0	0	0	0	1	0	0	0	0	0	0	0	0	0	0	0	0	0	3	0	0	0	0	0	0	0	0	2	0	0	0	2	1	0	1	1	0	0	0	0	0
SPAC22H10.03c.1:exon:4-SPAC22H10.03c.1:exon:2	SPAC22H10.03c.1:exon:3	171	1	0	0	0	0	0	0	0	0	0	0	1	0	0	0	0	0	1	0	0	0	0	0	0	0	0	0	0	0	0	0	0	0	0	0	0	0	0	0	0	0	0	0	0	0	0	0
SPAC15F9.03c.1:exon:4-SPAC15F9.03c.1:exon:2	SPAC15F9.03c.1:exon:3	72	1	0	0	0	0	0	0	0	0	0	0	0	0	0	0	0	0	0	0	0	0	0	0	0	0	0	0	0	0	0	0	0	0	0	0	0	0	0	0	0	0	0	0	0	0	0	0
SPAC15F9.03c.1:exon:4-SPAC15F9.03c.1:exon:1	SPAC15F9.03c.1:exon:3;SPAC15F9.03c.1:exon:2	174	2	0	0	0	0	0	0	0	0	0	1	0	0	0	0	0	0	1	0	0	0	0	0	2	0	0	0	0	0	0	0	0	0	0	0	0	0	0	0	0	0	1	0	0	0	0	0
SPAC23H3.07c.1:exon:3-SPAC23H3.07c.1:exon:1	SPAC23H3.07c.1:exon:2	47	1	0	0	0	0	0	0	0	0	0	0	0	0	0	0	0	0	0	0	0	0	0	0	0	0	0	0	0	0	0	0	0	0	0	0	0	0	0	0	0	0	0	0	0	0	0	0
SPAC7D4.05.1:exon:3-SPAC7D4.05.1:exon:1	SPAC7D4.05.1:exon:2	77	1	1	1	0	0	0	0	0	0	1	0	0	1	0	0	0	0	0	0	0	0	0	0	0	0	1	0	1	0	1	2	1	2	0	0	0	0	0	0	0	1	0	0	0	0	0	0
SPAC6F6.11c.1:exon:5-SPAC6F6.11c.1:exon:3	SPAC6F6.11c.1:exon:4	109	1	0	0	0	0	0	0	0	0	0	0	0	0	0	0	0	0	0	0	0	0	0	0	0	0	0	0	0	0	0	0	0	0	0	0	0	0	0	0	0	0	0	0	0	0	0	0
SPAC6F6.11c.1:exon:4-SPAC6F6.11c.1:exon:1	SPAC6F6.11c.1:exon:3;SPAC6F6.11c.1:exon:2	307	2	0	0	0	0	0	0	0	0	0	0	0	0	0	0	0	0	0	0	0	0	0	0	1	0	0	0	0	0	0	0	0	0	0	0	0	0	0	0	0	0	0	0	0	0	0	0
SPAC6F6.11c.1:exon:3-SPAC6F6.11c.1:exon:1	SPAC6F6.11c.1:exon:2	118	1	0	0	0	0	0	0	0	0	0	0	0	0	0	1	0	0	0	0	0	0	0	0	1	0	0	0	2	0	0	6	1	0	0	0	0	0	0	0	0	0	1	0	0	0	0	1
SPAC6F6.16c.1:five_prime_UTR:2-SPAC6F6.16c.1:exon:4	SPAC6F6.16c.1:exon:6;SPAC6F6.16c.1:exon:5	485	2	0	0	1	0	0	0	0	0	0	0	0	0	0	0	0	0	0	0	0	0	0	0	0	0	0	0	0	0	0	0	0	0	0	0	0	0	0	0	1	0	0	0	0	0	0	0
SPAC1805.01c.1:exon:4-SPAC1805.01c.1:exon:1	SPAC1805.01c.1:exon:3;SPAC1805.01c.1:exon:2	2126	2	0	0	0	0	0	0	0	0	0	0	0	0	0	0	0	0	0	0	0	0	0	0	0	0	0	0	0	0	0	0	0	0	0	0	0	0	0	0	0	0	0	0	0	0	0	0
SPAC1805.05.1:exon:2-SPAC1805.05.1:exon:4	SPAC1805.05.1:exon:3	149	1	0	1	0	0	0	0	0	0	0	0	0	0	0	0	0	0	0	0	0	0	0	0	0	0	0	0	0	0	0	0	0	0	0	0	0	0	0	0	0	0	0	0	0	0	0	0
SPAC3A11.13.1:exon:3-SPAC3A11.13.1:exon:1	SPAC3A11.13.1:exon:2	125	1	0	0	1	0	0	0	1	0	0	1	0	0	0	0	0	0	0	0	0	0	0	0	0	0	0	0	0	0	0	0	0	0	0	0	0	0	0	0	2	0	0	0	0	0	0	0
SPAC3A11.06.1:exon:8-SPAC3A11.06.1:exon:5	SPAC3A11.06.1:exon:7;SPAC3A11.06.1:exon:6	71	2	0	0	0	0	0	0	0	0	0	0	0	0	0	0	0	0	0	0	0	0	0	0	1	0	0	0	0	0	0	0	0	0	0	0	0	0	0	0	0	0	0	0	0	0	0	0
SPAC3A11.06.1:exon:5-SPAC3A11.06.1:exon:1	SPAC3A11.06.1:exon:4;SPAC3A11.06.1:exon:3;SPAC3A11.06.1:exon:2	612	3	0	0	0	0	0	0	0	0	0	0	0	0	0	0	0	0	0	0	0	0	0	0	0	0	0	0	0	0	0	0	0	0	0	0	0	0	0	0	0	0	0	0	0	0	0	0
SPAC3A11.06.1:exon:3-SPAC3A11.06.1:exon:1	SPAC3A11.06.1:exon:2	174	1	0	0	0	0	0	0	0	0	0	0	0	0	0	0	0	0	0	0	0	0	0	0	0	0	0	0	0	0	0	0	0	0	0	0	0	0	0	0	0	0	0	0	0	0	0	0
SPAC17G6.16c.1:exon:7-SPAC17G6.16c.1:exon:5	SPAC17G6.16c.1:exon:6	87	1	0	1	0	0	0	0	0	0	0	0	0	0	0	0	0	0	0	0	0	0	0	0	0	0	0	0	0	0	0	0	0	0	0	0	0	0	0	0	0	0	0	0	0	0	1	0
SPAC8C9.14.1:exon:2-SPAC8C9.14.1:exon:4	SPAC8C9.14.1:exon:3	80	1	0	0	0	0	0	0	0	0	0	0	0	0	0	0	0	1	0	0	0	0	0	0	0	0	0	0	0	0	0	0	0	0	0	0	0	0	0	0	0	0	0	0	0	0	0	0
SPAC15A10.13.1:exon:3-SPAC15A10.13.1:exon:7	SPAC15A10.13.1:exon:4;SPAC15A10.13.1:exon:5;SPAC15A10.13.1:exon:6	1163	3	0	0	1	0	0	0	0	0	0	0	1	0	0	0	0	0	0	0	0	0	0	0	0	0	0	0	0	0	0	0	0	0	0	0	0	0	0	1	0	0	0	0	0	0	0	1
SPAC15E1.08.1:exon:1-SPAC15E1.08.1:exon:3	SPAC15E1.08.1:exon:2	195	1	0	1	0	0	0	0	0	0	0	0	0	0	0	0	0	0	0	0	0	0	0	0	0	0	0	0	0	0	0	0	0	0	0	0	0	0	0	0	0	0	0	0	0	0	0	0
SPAC926.07c.1:exon:3-SPAC926.07c.1:exon:1	SPAC926.07c.1:exon:2	97	1	0	0	0	0	0	0	0	0	0	0	0	0	0	0	2	0	0	0	0	0	0	0	0	0	0	0	0	0	0	0	0	0	0	0	0	0	0	0	0	0	1	0	0	0	0	0
SPAC19G12.02c.1:five_prime_UTR:2-SPAC19G12.02c.1:exon:2	SPAC19G12.02c.1:exon:4;SPAC19G12.02c.1:exon:3	1357	2	0	0	0	0	0	0	0	0	0	0	0	0	0	0	0	0	0	0	0	0	0	0	0	0	0	0	0	0	0	0	0	0	0	0	0	0	0	0	0	0	0	0	0	0	0	0
SPAC26H5.02c.1:exon:5-SPAC26H5.02c.1:exon:3	SPAC26H5.02c.1:exon:4	31	1	1	1	1	0	0	0	0	0	0	0	0	0	3	1	1	0	0	0	0	0	0	0	0	0	0	0	1	1	3	0	0	0	0	1	0	0	3	0	0	0	0	0	0	0	0	0
SPAC29E6.08.1:exon:1-SPAC29E6.08.1:exon:3	SPAC29E6.08.1:exon:2	61	1	0	0	0	0	0	0	0	0	0	0	0	0	0	0	0	0	0	0	0	0	0	0	0	0	0	0	0	0	0	0	0	0	0	0	0	0	0	0	0	1	0	0	0	0	0	0
SPAC16.02c.1:exon:9-SPAC16.02c.1:exon:2	SPAC16.02c.1:exon:8;SPAC16.02c.1:exon:7;SPAC16.02c.1:exon:6;SPAC16.02c.1:exon:5;SPAC16.02c.1:exon:4;SPAC16.02c.1:exon:3	281	6	0	0	1	0	0	0	0	0	0	0	0	0	0	0	0	0	0	0	0	0	0	0	0	0	0	0	0	0	0	0	0	0	0	0	0	0	0	0	0	0	1	0	0	0	0	0
SPAC637.05c.1:exon:3-SPAC637.05c.1:exon:1	SPAC637.05c.1:exon:2	850	1	1	0	0	0	0	0	0	0	0	0	0	0	0	0	0	0	0	0	0	0	0	0	0	0	0	0	0	0	0	0	0	0	0	0	0	0	0	0	0	0	0	0	0	0	0	0
SPAC1834.06c.1:exon:3-SPAC1834.06c.1:exon:1	SPAC1834.06c.1:exon:2	453	1	0	0	0	0	0	0	0	0	0	0	0	0	0	0	0	0	0	0	0	0	0	0	0	0	0	0	0	0	0	0	0	0	0	0	0	0	0	0	0	0	0	0	0	0	0	0
SPAC17D4.04.1:exon:2-SPAC17D4.04.1:exon:4	SPAC17D4.04.1:exon:3	123	1	0	1	0	0	0	0	0	0	1	0	0	0	0	0	0	0	0	0	0	0	0	0	0	0	0	0	0	0	0	0	0	0	0	0	0	0	0	0	0	0	0	0	0	0	0	0
SPAPYUG7.04c.1:exon:4-SPAPYUG7.04c.1:exon:2	SPAPYUG7.04c.1:exon:3	50	1	0	0	0	0	0	0	0	0	0	0	0	0	0	0	0	0	0	0	0	0	0	0	0	0	0	0	0	0	0	0	0	0	0	0	0	0	0	0	0	0	0	0	0	0	0	0
SPAC1782.07.1:exon:2-SPAC1782.07.1:exon:4	SPAC1782.07.1:exon:3	214	1	1	0	0	0	0	0	0	0	0	0	0	0	0	0	0	0	0	0	0	0	0	0	1	0	0	0	0	0	0	0	0	0	0	0	0	0	0	0	0	0	0	0	0	0	0	0
SPAC22F8.07c.1:exon:4-SPAC22F8.07c.1:exon:2	SPAC22F8.07c.1:exon:3	333	1	0	0	0	0	0	0	0	0	0	0	0	0	0	0	0	1	0	0	0	0	0	0	1	0	0	0	0	0	0	0	0	0	0	0	0	0	0	0	0	1	0	0	0	0	1	0
SPAC890.07c.1:exon:9-SPAC890.07c.1:exon:3	SPAC890.07c.1:exon:8;SPAC890.07c.1:exon:7;SPAC890.07c.1:exon:6;SPAC890.07c.1:exon:5;SPAC890.07c.1:exon:4	493	5	0	0	0	0	0	0	0	0	0	0	0	0	0	0	0	0	0	0	0	0	0	0	0	0	0	0	0	0	0	0	0	0	0	0	0	0	0	0	1	0	0	0	0	0	0	0
SPAC890.07c.1:exon:4-SPAC890.07c.1:exon:2	SPAC890.07c.1:exon:3	335	1	0	0	0	0	0	0	0	0	0	0	1	0	0	0	0	0	0	0	0	0	0	0	0	0	0	0	0	0	1	0	0	0	0	0	0	0	0	0	0	0	0	0	0	0	0	0
SPAC22E12.16c.1:exon:4-SPAC22E12.16c.1:exon:1	SPAC22E12.16c.1:exon:3;SPAC22E12.16c.1:exon:2	161	2	1	0	0	0	0	0	0	0	0	0	0	0	0	0	0	0	0	0	0	0	0	0	0	0	0	0	0	0	0	0	0	0	0	0	0	0	0	0	0	0	0	0	0	0	0	0
SPAP8A3.08.1:exon:1-SPAP8A3.08.1:exon:3	SPAP8A3.08.1:exon:2	132	1	0	0	0	0	0	0	0	0	0	0	0	0	0	0	0	0	0	0	0	0	0	0	0	0	0	0	0	0	0	0	0	1	0	0	0	0	0	0	0	0	0	0	0	0	0	0
SPAP8A3.09c.1:exon:5-SPAP8A3.09c.1:exon:1	SPAP8A3.09c.1:exon:4;SPAP8A3.09c.1:exon:3;SPAP8A3.09c.1:exon:2	1343	3	0	0	0	0	0	0	0	0	0	0	0	0	0	0	0	0	0	0	0	0	0	0	1	0	0	0	0	0	0	0	0	0	0	0	0	0	0	0	0	0	0	0	0	0	0	0
SPAC4D7.04c.1:exon:3-SPAC4D7.04c.1:exon:1	SPAC4D7.04c.1:exon:2	217	1	0	0	0	0	0	0	0	0	0	0	0	0	0	0	0	0	0	0	0	0	0	0	0	0	0	0	0	0	0	0	0	0	0	0	0	0	0	0	0	0	0	0	0	0	0	0
SPAC4D7.09.1:exon:2-SPAC4D7.09.1:exon:5	SPAC4D7.09.1:exon:3;SPAC4D7.09.1:exon:4	585	2	0	0	0	0	0	0	0	0	0	0	0	0	0	0	0	0	0	0	0	0	0	0	0	0	0	0	0	0	0	0	0	0	0	0	0	0	0	0	0	0	0	0	0	0	0	0
SPAC4D7.09.1:exon:3-SPAC4D7.09.1:exon:5	SPAC4D7.09.1:exon:4	143	1	0	0	0	0	0	0	0	0	0	0	0	0	0	0	0	0	0	0	0	0	0	0	0	0	0	0	0	0	0	0	0	0	0	0	0	0	0	0	0	3	1	0	0	0	0	0
SPAC13G6.04.1:exon:1-SPAC13G6.04.1:exon:3	SPAC13G6.04.1:exon:2	136	1	0	0	1	0	0	0	0	0	0	0	0	0	0	0	0	1	0	0	0	0	0	0	1	0	0	0	0	0	0	0	0	0	0	0	0	0	0	0	0	0	0	0	0	0	0	1
SPAC1639.02c.1:exon:6-SPAC1639.02c.1:exon:2	SPAC1639.02c.1:exon:5;SPAC1639.02c.1:exon:4;SPAC1639.02c.1:exon:3	157	3	0	0	0	0	0	0	0	0	0	0	0	0	0	0	0	0	0	0	0	0	0	0	0	0	0	0	0	0	0	0	0	0	0	0	0	0	0	0	0	0	0	0	0	0	0	0
SPAC18B11.08c.1:exon:1-SPAC18B11.08c.1:exon:4	SPAC18B11.08c.1:exon:2;SPAC18B11.08c.1:exon:3	148	2	0	0	0	0	0	0	0	0	0	0	0	0	0	0	0	0	1	0	0	0	0	0	0	0	0	0	0	0	0	0	0	0	0	0	0	0	0	1	0	1	0	0	0	0	0	0
SPAC18B11.08c.1:exon:1-SPAC18B11.08c.1:exon:5	SPAC18B11.08c.1:exon:2;SPAC18B11.08c.1:exon:3;SPAC18B11.08c.1:exon:4	185	3	0	0	1	0	0	0	0	0	0	1	0	0	0	0	0	0	1	0	0	0	0	0	0	0	0	0	0	0	0	0	0	0	0	0	0	0	0	3	1	2	0	0	0	0	0	0
SPAC18B11.05.1:five_prime_UTR:2-SPAC18B11.05.1:exon:1	SPAC18B11.05.1:exon:2	89	1	0	1	0	0	0	0	0	0	3	1	1	0	1	5	0	0	0	10	5	0	0	0	0	15	23	3	6	7	7	0	0	0	4	1	2	3	0	0	1	0	3	0	0	1	1	0
SPAC13C5.05c.1:exon:3-SPAC13C5.05c.1:exon:1	SPAC13C5.05c.1:exon:2	86	1	1	0	0	0	0	0	0	0	2	0	0	0	0	0	1	0	0	0	0	0	0	0	0	0	0	0	0	0	0	0	0	0	0	0	0	0	0	0	0	1	0	0	0	0	0	0
SPAC227.16c.1:exon:4-SPAC227.16c.1:exon:2	SPAC227.16c.1:exon:3	135	1	0	0	0	0	0	0	0	0	0	0	0	0	0	1	0	0	0	0	0	0	0	0	0	0	1	0	0	0	1	0	0	0	1	0	0	0	0	0	0	0	0	0	0	0	0	0
SPAC1296.06.1:exon:1-SPAC1296.06.1:exon:4	SPAC1296.06.1:exon:2;SPAC1296.06.1:exon:3	176	2	0	0	0	0	0	0	0	0	0	0	0	0	0	0	0	0	0	0	0	0	0	0	0	0	0	0	0	0	0	0	0	0	0	0	0	0	0	0	0	0	0	0	0	0	0	0
SPAC2G11.07c.1:exon:3-SPAC2G11.07c.1:exon:1	SPAC2G11.07c.1:exon:2	74	1	0	0	0	1	0	0	0	0	0	1	1	1	0	2	0	1	1	0	0	0	0	0	0	0	0	0	0	1	0	0	0	0	0	0	0	1	0	1	4	2	2	1	0	0	0	0
SPAC2G11.14.1:exon:1-SPAC2G11.14.1:exon:4	SPAC2G11.14.1:exon:2;SPAC2G11.14.1:exon:3	720	2	0	0	0	0	0	0	0	0	0	1	0	0	0	0	1	0	0	0	0	0	0	0	0	0	0	0	0	0	0	0	0	0	0	0	0	0	0	0	0	1	0	0	0	0	0	1
SPAC23G3.06.1:exon:1-SPAC23G3.06.1:exon:3	SPAC23G3.06.1:exon:2	103	1	0	0	0	0	0	0	0	0	0	0	0	0	0	0	0	0	0	0	0	0	0	0	0	2	0	0	0	0	0	0	0	0	0	0	0	0	0	0	0	1	0	0	0	0	0	0
SPAC1687.01.1:exon:1-SPAC1687.01.1:exon:3	SPAC1687.01.1:exon:2	98	1	0	0	0	0	0	0	0	0	0	0	0	0	3	3	0	0	0	0	2	0	0	0	0	0	0	0	0	0	1	0	0	0	0	1	1	0	1	0	0	0	1	0	0	0	0	0
SPAC821.06.1:exon:2-SPAC821.06.1:exon:4	SPAC821.06.1:exon:3	129	1	0	0	0	0	0	0	0	0	0	0	0	0	0	0	0	1	0	0	0	0	0	0	0	0	0	0	0	0	0	0	0	0	0	0	0	0	0	0	0	0	0	0	0	0	0	0
SPAC30D11.05.1:exon:3-SPAC30D11.05.1:exon:1	SPAC30D11.05.1:exon:2	54	1	0	1	0	0	0	0	0	0	0	0	0	0	0	0	0	0	0	0	0	0	0	0	0	0	0	0	0	0	0	0	0	0	0	0	0	0	0	0	0	0	0	0	0	0	0	0
SPAPB17E12.08.1:exon:1-SPAPB17E12.08.1:exon:3	SPAPB17E12.08.1:exon:2	50	1	0	0	0	0	0	0	0	0	0	0	0	0	0	0	0	0	0	0	0	0	0	0	1	0	0	0	0	0	0	0	0	0	0	0	0	0	0	0	0	1	0	0	0	0	0	0
SPAC6F12.12.1:exon:2-SPAC6F12.12.1:exon:5	SPAC6F12.12.1:exon:3;SPAC6F12.12.1:exon:4	592	2	0	0	0	0	0	0	0	0	0	0	0	0	0	0	0	0	0	0	0	0	0	0	0	0	0	0	0	0	0	0	0	0	0	0	0	0	0	0	0	0	0	0	0	0	0	0
SPAC57A10.03.1:exon:1-SPAC57A10.03.1:exon:5	SPAC57A10.03.1:exon:2;SPAC57A10.03.1:exon:3;SPAC57A10.03.1:exon:4	176	3	0	0	0	0	0	0	0	0	0	0	0	0	0	0	0	0	0	0	0	0	0	0	0	0	0	0	0	0	0	0	0	0	0	0	0	0	0	0	0	0	0	0	0	0	0	0
SPAC9.07c.1:exon:3-SPAC9.07c.1:exon:1	SPAC9.07c.1:exon:2	800	1	0	0	0	0	0	0	0	0	0	0	0	0	0	0	0	0	0	0	0	0	0	0	1	0	0	0	0	0	0	0	0	0	0	0	0	0	0	0	0	0	0	0	0	0	0	0
SPAC5D6.04.1:exon:3-SPAC5D6.04.1:exon:1	SPAC5D6.04.1:exon:2	91	1	0	0	0	0	0	0	0	0	0	0	0	1	0	0	0	0	0	0	0	0	0	0	1	0	0	0	0	0	0	0	0	0	0	0	0	0	0	0	0	0	0	0	0	0	0	0
SPAC140.03.1:exon:1-SPAC140.03.1:exon:4	SPAC140.03.1:exon:2;SPAC140.03.1:exon:3	101	2	0	0	0	0	0	0	0	0	0	0	0	0	0	0	0	0	0	0	0	0	0	0	0	0	0	0	0	0	0	0	0	0	0	0	0	0	0	0	0	0	0	0	0	0	0	0
SPAC17H9.07.1:exon:1-SPAC17H9.07.1:three_prime_UTR:2	SPAC17H9.07.1:exon:2;SPAC17H9.07.1:exon:3	609	2	0	0	0	0	0	0	0	0	0	0	0	0	0	0	0	0	0	0	0	0	0	0	0	0	0	0	0	0	0	0	0	0	0	0	0	0	0	0	0	0	0	0	0	0	0	0
SPAC17H9.07.1:exon:2-SPAC17H9.07.1:three_prime_UTR:2	SPAC17H9.07.1:exon:3	419	1	0	0	0	0	0	0	0	0	0	0	0	0	0	0	0	0	0	0	0	0	0	0	0	0	0	0	0	0	0	0	0	0	0	0	0	0	0	0	0	0	0	0	0	0	0	0
SPAC23C11.08.1:exon:1-SPAC23C11.08.1:exon:3	SPAC23C11.08.1:exon:2	61	1	0	0	0	0	0	0	0	0	0	1	0	0	0	0	0	0	0	0	0	0	0	0	2	0	0	0	0	0	4	0	0	0	0	0	0	0	0	0	0	0	0	0	0	0	0	0
SPAC4G9.14.1:exon:2-SPAC4G9.14.1:exon:4	SPAC4G9.14.1:exon:3	23	1	0	0	0	0	0	0	0	0	0	0	0	0	0	0	0	0	0	0	0	0	0	0	0	0	0	0	0	0	0	0	0	0	0	0	0	0	0	0	0	0	0	0	0	0	0	0
SPAC13G7.07.1:exon:2-SPAC13G7.07.1:exon:4	SPAC13G7.07.1:exon:3	58	1	1	0	0	0	0	0	0	0	0	0	0	0	0	0	0	1	0	0	0	0	0	0	0	0	0	0	0	0	0	0	0	0	0	0	0	0	0	0	0	0	1	0	0	0	0	0
SPAC6C3.09.1:exon:1-SPAC6C3.09.1:exon:4	SPAC6C3.09.1:exon:2;SPAC6C3.09.1:exon:3	205	2	0	1	0	0	0	0	0	0	0	0	1	0	1	0	0	0	0	0	0	0	0	0	0	0	0	0	0	0	0	0	0	0	0	0	0	0	0	1	0	0	4	0	0	0	1	0
SPAC4F8.14c.1:five_prime_UTR:1-SPAC4F8.14c.1:exon:2	SPAC4F8.14c.1:exon:1	72	1	0	0	0	0	0	1	0	0	0	1	0	0	0	0	0	0	0	0	0	0	0	0	0	0	0	0	0	0	0	0	0	0	0	0	0	0	0	0	0	0	0	0	0	0	0	0
SPAC644.18c.1:exon:4-SPAC644.18c.1:exon:1	SPAC644.18c.1:exon:3;SPAC644.18c.1:exon:2	381	2	0	1	0	0	0	0	0	0	0	0	1	0	0	0	0	0	0	0	0	0	0	0	0	0	0	0	0	0	0	0	0	0	0	0	0	0	0	0	0	0	0	0	0	0	0	0
SPAPB2B4.05.1:exon:1-SPAPB2B4.05.1:exon:5	SPAPB2B4.05.1:exon:2;SPAPB2B4.05.1:exon:3;SPAPB2B4.05.1:exon:4	341	3	0	0	1	0	0	0	0	0	0	0	0	0	0	0	0	0	1	0	0	0	0	0	0	0	0	0	0	0	0	0	0	0	0	0	0	0	0	0	0	0	0	0	0	0	0	0
SPAPB2B4.05.1:exon:2-SPAPB2B4.05.1:exon:4	SPAPB2B4.05.1:exon:3	95	1	0	0	0	0	0	0	0	0	0	0	0	0	0	0	0	0	0	0	0	0	0	0	0	0	0	0	0	0	0	0	0	0	0	0	0	0	0	0	0	0	0	0	0	0	0	0
SPAC6F6.12.1:exon:1-SPAC6F6.12.1:exon:3	SPAC6F6.12.1:exon:2	136	1	0	0	2	0	0	0	0	0	0	0	0	0	0	1	0	0	1	0	0	0	0	0	0	0	0	0	0	0	0	0	0	0	0	0	0	0	0	0	0	0	0	0	0	0	0	0
SPAC6F6.15.1:exon:1-SPAC6F6.15.1:exon:4	SPAC6F6.15.1:exon:2;SPAC6F6.15.1:exon:3	64	2	0	0	0	0	0	0	0	0	0	0	0	0	0	0	0	0	0	1	0	0	0	0	0	0	0	0	0	1	0	0	0	0	2	0	0	0	0	0	0	0	0	0	0	1	0	0
SPAC16A10.04.1:exon:4-SPAC16A10.04.1:exon:6	SPAC16A10.04.1:exon:5	135	1	0	0	0	0	0	0	0	0	0	0	0	1	0	0	0	0	0	0	0	0	0	0	1	0	1	0	0	0	0	0	0	0	0	0	0	0	0	0	0	0	0	0	0	0	0	0
SPAC8C9.05.1:exon:2-SPAC8C9.05.1:exon:7	SPAC8C9.05.1:exon:3;SPAC8C9.05.1:exon:4;SPAC8C9.05.1:exon:5;SPAC8C9.05.1:exon:6	297	4	1	0	0	0	0	0	0	0	0	0	0	0	0	0	0	0	0	0	0	0	0	0	0	0	0	0	0	0	0	0	0	0	0	0	0	0	0	0	0	0	0	0	0	0	0	0
SPAC8C9.05.1:exon:4-SPAC8C9.05.1:exon:7	SPAC8C9.05.1:exon:5;SPAC8C9.05.1:exon:6	148	2	0	0	0	0	0	0	0	0	0	0	0	0	0	0	0	0	0	0	0	0	0	0	0	0	0	0	0	0	0	0	0	0	0	0	0	0	0	0	0	0	0	0	0	0	0	0
SPAC8C9.05.1:exon:5-SPAC8C9.05.1:exon:7	SPAC8C9.05.1:exon:6	4	1	0	0	0	0	0	0	0	0	0	0	0	0	0	0	0	1	0	0	0	0	0	0	0	0	0	0	0	0	0	0	0	0	0	0	0	0	0	0	0	0	0	0	0	0	0	0
SPAC15A10.06.1:exon:1-SPAC15A10.06.1:exon:3	SPAC15A10.06.1:exon:2	317	1	0	0	0	0	0	0	0	0	0	0	0	0	0	0	0	0	0	0	0	0	0	0	0	0	0	0	0	0	0	0	0	0	0	0	0	0	0	0	0	1	0	0	0	0	0	0
SPAPB18E9.01.1:exon:2-SPAPB18E9.01.1:exon:7	SPAPB18E9.01.1:exon:3;SPAPB18E9.01.1:exon:4;SPAPB18E9.01.1:exon:5;SPAPB18E9.01.1:exon:6	941	4	0	1	0	0	0	0	0	0	0	0	0	0	0	0	0	0	1	0	0	0	0	0	0	0	0	0	0	0	0	0	0	0	0	0	0	0	0	0	0	0	0	0	0	0	0	0
SPAC19G12.01c.1:exon:5-SPAC19G12.01c.1:exon:3	SPAC19G12.01c.1:exon:4	220	1	0	0	0	0	0	0	0	0	0	0	0	0	0	0	0	0	0	0	0	0	0	0	0	0	0	0	0	0	0	0	0	0	0	0	0	0	0	0	1	1	1	0	0	0	0	0
SPAC19G12.01c.1:exon:3-SPAC19G12.01c.1:exon:1	SPAC19G12.01c.1:exon:2	58	1	0	0	0	0	0	0	0	0	0	0	1	0	0	0	0	0	0	0	0	0	0	0	0	0	0	0	0	0	0	0	0	0	0	0	0	0	0	0	0	0	0	0	0	0	0	0
SPAC19G12.17.1:exon:5-SPAC19G12.17.1:exon:3	SPAC19G12.17.1:exon:4	58	1	0	0	0	0	0	0	0	0	0	0	0	0	0	0	0	1	0	1	0	0	0	0	0	0	0	0	0	1	0	0	0	0	0	0	0	0	0	0	3	2	0	0	0	0	0	0
SPAC30.03c.1:exon:6-SPAC30.03c.1:exon:1	SPAC30.03c.1:exon:5;SPAC30.03c.1:exon:4;SPAC30.03c.1:exon:3;SPAC30.03c.1:exon:2	565	4	0	1	0	0	0	0	0	0	0	0	1	0	0	0	0	0	0	0	0	0	0	0	0	0	0	0	0	0	0	0	0	0	0	0	0	0	0	0	0	1	0	0	0	0	0	0
SPAC9E9.17c.1:exon:3-SPAC9E9.17c.1:exon:1	SPAC9E9.17c.1:exon:2	43	1	0	0	0	0	0	0	0	0	0	0	0	0	0	0	0	0	0	0	0	0	0	0	0	0	0	0	0	0	0	0	0	0	0	0	0	0	0	0	0	0	0	0	0	0	0	0
SPAC1851.03.1:exon:1-SPAC1851.03.1:three_prime_UTR:2	SPAC1851.03.1:exon:2;SPAC1851.03.1:exon:3	1477	2	0	0	0	0	0	0	0	0	0	0	1	0	0	0	0	0	1	0	0	0	0	0	0	0	0	0	0	0	0	0	0	0	0	0	0	0	0	1	0	1	1	0	0	0	0	0
SPAC12B10.05.1:exon:1-SPAC12B10.05.1:exon:10	SPAC12B10.05.1:exon:2;SPAC12B10.05.1:exon:3;SPAC12B10.05.1:exon:4;SPAC12B10.05.1:exon:5;SPAC12B10.05.1:exon:6;SPAC12B10.05.1:exon:7;SPAC12B10.05.1:exon:8;SPAC12B10.05.1:exon:9	788	8	0	0	1	0	0	0	0	0	0	2	0	0	0	0	0	0	0	0	0	0	0	0	0	0	0	0	0	0	0	0	0	0	0	0	0	0	0	0	0	0	0	0	0	0	0	1
SPAC12B10.05.1:exon:1-SPAC12B10.05.1:exon:11	SPAC12B10.05.1:exon:2;SPAC12B10.05.1:exon:3;SPAC12B10.05.1:exon:4;SPAC12B10.05.1:exon:5;SPAC12B10.05.1:exon:6;SPAC12B10.05.1:exon:7;SPAC12B10.05.1:exon:8;SPAC12B10.05.1:exon:9;SPAC12B10.05.1:exon:10	1010	9	0	0	0	0	0	0	0	0	0	0	0	0	0	0	0	0	0	0	0	0	0	0	0	0	0	0	0	0	0	0	0	0	0	0	0	0	0	0	0	0	0	0	0	0	0	0
SPAC12B10.05.1:exon:2-SPAC12B10.05.1:exon:4	SPAC12B10.05.1:exon:3	21	1	1	0	0	0	0	0	0	0	0	1	1	0	0	0	0	1	1	0	0	0	0	0	0	0	0	1	0	0	0	0	0	0	0	0	0	0	0	0	1	2	0	0	0	0	0	1
SPAC12B10.05.1:exon:2-SPAC12B10.05.1:exon:12	SPAC12B10.05.1:exon:3;SPAC12B10.05.1:exon:4;SPAC12B10.05.1:exon:5;SPAC12B10.05.1:exon:6;SPAC12B10.05.1:exon:7;SPAC12B10.05.1:exon:8;SPAC12B10.05.1:exon:9;SPAC12B10.05.1:exon:10;SPAC12B10.05.1:exon:11	1015	9	0	1	0	0	0	0	0	0	0	1	2	0	0	0	0	2	0	0	0	0	0	0	1	0	0	0	0	0	0	0	0	0	0	0	0	0	0	0	0	2	2	0	0	0	1	1
SPAC144.03.1:exon:1-SPAC144.03.1:exon:3	SPAC144.03.1:exon:2	97	1	0	0	1	0	0	0	0	0	2	0	0	0	0	0	0	0	0	0	0	0	0	0	0	0	0	0	0	0	0	0	0	0	0	0	0	0	0	0	0	1	0	0	0	0	0	0
SPAC1834.07.1:exon:1-SPAC1834.07.1:exon:3	SPAC1834.07.1:exon:2	100	1	0	1	0	0	0	0	0	0	0	0	0	0	0	0	0	0	1	0	0	0	0	0	0	0	0	0	0	0	0	0	0	0	0	0	0	0	0	0	0	0	0	0	0	0	0	0
SPAC1782.12c.1:exon:2-SPAC1782.12c.1:three_prime_UTR:1	SPAC1782.12c.1:exon:1	1199	1	0	0	0	0	0	0	0	0	0	0	0	0	0	0	0	0	0	0	0	0	0	0	0	0	0	0	0	0	0	0	0	0	0	0	0	0	0	0	0	0	0	0	0	0	0	0
SPAC14C4.02c.1:exon:3-SPAC14C4.02c.1:exon:1	SPAC14C4.02c.1:exon:2	166	1	0	0	0	0	0	0	0	0	0	0	0	0	0	0	0	0	0	0	0	0	0	0	0	0	0	0	0	0	0	0	0	0	0	0	0	0	0	0	0	0	0	0	0	0	0	0
SPAP8A3.05.1:exon:3-SPAP8A3.05.1:exon:5	SPAP8A3.05.1:exon:4	85	1	0	0	0	0	0	0	0	0	0	0	0	0	0	0	0	0	0	0	0	0	0	0	0	0	0	0	0	0	0	0	0	0	0	0	0	0	0	0	0	0	0	0	0	0	0	0
SPBC428.01c.1:exon:7-SPBC428.01c.1:exon:3	SPBC428.01c.1:exon:6;SPBC428.01c.1:exon:5;SPBC428.01c.1:exon:4	209	3	0	0	0	0	0	0	0	0	0	1	0	0	0	0	0	0	0	0	0	0	0	0	1	0	0	0	0	0	0	0	0	0	0	0	0	0	0	0	0	0	0	0	0	0	0	0
SPBC428.01c.1:exon:7-SPBC428.01c.1:exon:2	SPBC428.01c.1:exon:6;SPBC428.01c.1:exon:5;SPBC428.01c.1:exon:4;SPBC428.01c.1:exon:3	302	4	0	0	0	0	0	0	0	0	0	0	0	0	0	0	0	0	0	0	0	0	0	0	0	0	0	0	0	0	0	0	0	0	0	0	0	0	0	0	0	0	0	0	0	0	0	0
SPBC428.16c.1:exon:3-SPBC428.16c.1:exon:1	SPBC428.16c.1:exon:2	259	1	0	0	0	0	0	0	0	0	0	0	0	0	0	0	0	0	0	0	0	0	0	0	0	0	0	0	0	0	0	0	0	0	0	0	0	0	0	0	0	0	0	0	0	0	0	0
SPBC1685.10.1:exon:1-SPBC1685.10.1:exon:3	SPBC1685.10.1:exon:2	93	1	0	0	1	0	0	0	0	0	0	0	0	0	0	0	0	0	0	0	0	0	0	0	0	0	0	0	0	0	1	0	0	0	0	0	0	1	0	0	0	0	0	0	0	0	0	0
SPBC36.05c.1:exon:14-SPBC36.05c.1:exon:8	SPBC36.05c.1:exon:13;SPBC36.05c.1:exon:12;SPBC36.05c.1:exon:11;SPBC36.05c.1:exon:10;SPBC36.05c.1:exon:9	306	5	0	0	0	0	0	0	0	0	0	0	0	0	0	0	0	0	0	0	0	0	0	0	0	0	0	0	0	0	0	0	0	0	0	0	0	0	0	0	0	0	0	0	0	0	0	0
SPBC36.05c.1:exon:14-SPBC36.05c.1:exon:4	SPBC36.05c.1:exon:13;SPBC36.05c.1:exon:12;SPBC36.05c.1:exon:11;SPBC36.05c.1:exon:10;SPBC36.05c.1:exon:9;SPBC36.05c.1:exon:8;SPBC36.05c.1:exon:7;SPBC36.05c.1:exon:6;SPBC36.05c.1:exon:5	789	9	0	0	0	0	0	0	0	0	0	1	0	0	0	0	0	0	0	0	0	0	0	0	0	0	0	0	0	0	0	0	0	0	0	0	0	0	0	0	0	0	0	0	0	0	0	0
SPBC36.05c.1:exon:13-SPBC36.05c.1:exon:5	SPBC36.05c.1:exon:12;SPBC36.05c.1:exon:11;SPBC36.05c.1:exon:10;SPBC36.05c.1:exon:9;SPBC36.05c.1:exon:8;SPBC36.05c.1:exon:7;SPBC36.05c.1:exon:6	618	7	0	0	0	0	0	0	0	0	0	0	0	0	0	0	0	0	0	0	0	0	0	0	0	0	0	0	0	0	0	0	0	0	0	0	0	0	0	0	0	0	0	0	0	0	0	0
SPBC36.05c.1:exon:13-SPBC36.05c.1:exon:1	SPBC36.05c.1:exon:12;SPBC36.05c.1:exon:11;SPBC36.05c.1:exon:10;SPBC36.05c.1:exon:9;SPBC36.05c.1:exon:8;SPBC36.05c.1:exon:7;SPBC36.05c.1:exon:6;SPBC36.05c.1:exon:5;SPBC36.05c.1:exon:4;SPBC36.05c.1:exon:3;SPBC36.05c.1:exon:2	1036	11	0	0	0	0	0	0	0	0	0	0	1	0	0	0	0	0	0	0	0	0	0	0	1	0	0	0	0	0	0	0	0	0	0	0	0	0	0	0	0	0	1	0	0	0	0	0
SPBC36.05c.1:exon:12-SPBC36.05c.1:exon:9	SPBC36.05c.1:exon:11;SPBC36.05c.1:exon:10	149	2	0	0	0	0	0	0	0	0	0	0	0	0	0	0	0	0	0	0	0	0	0	0	0	0	0	0	0	0	0	0	0	0	0	0	0	0	0	0	1	0	0	0	0	0	0	0
SPBC36.05c.1:exon:12-SPBC36.05c.1:exon:1	SPBC36.05c.1:exon:11;SPBC36.05c.1:exon:10;SPBC36.05c.1:exon:9;SPBC36.05c.1:exon:8;SPBC36.05c.1:exon:7;SPBC36.05c.1:exon:6;SPBC36.05c.1:exon:5;SPBC36.05c.1:exon:4;SPBC36.05c.1:exon:3;SPBC36.05c.1:exon:2	985	10	0	0	0	0	0	0	0	0	0	0	0	0	0	0	0	0	0	0	0	0	0	0	1	0	0	0	0	0	0	0	0	0	0	0	0	0	0	0	0	0	0	0	0	0	0	0
SPBC36.05c.1:exon:11-SPBC36.05c.1:exon:9	SPBC36.05c.1:exon:10	31	1	0	0	0	0	0	0	0	0	0	0	0	0	0	0	0	0	0	0	0	0	0	0	2	0	0	0	0	0	0	0	0	0	0	0	0	0	0	0	0	1	0	0	0	0	0	0
SPBC36.05c.1:exon:5-SPBC36.05c.1:exon:2	SPBC36.05c.1:exon:4;SPBC36.05c.1:exon:3	250	2	1	0	0	0	0	0	0	0	0	0	1	0	0	0	0	0	0	0	0	0	0	0	0	0	0	0	0	0	0	0	0	0	0	0	0	0	0	0	0	0	0	0	0	0	0	0
SPBC646.03.1:exon:1-SPBC646.03.1:exon:3	SPBC646.03.1:exon:2	826	1	0	0	0	0	0	0	0	0	0	0	0	0	0	0	0	0	0	0	0	0	0	0	0	0	0	0	0	0	0	0	0	0	0	0	0	0	0	0	0	0	0	0	0	0	0	2
SPBP35G2.05c.1:exon:3-SPBP35G2.05c.1:exon:1	SPBP35G2.05c.1:exon:2	149	1	0	1	0	0	0	0	0	0	0	0	0	0	0	0	0	0	0	0	0	0	0	0	0	0	0	0	0	0	0	0	0	0	0	0	0	0	0	0	0	0	0	0	0	0	0	0
SPBC1709.04c.1:exon:6-SPBC1709.04c.1:exon:1	SPBC1709.04c.1:exon:5;SPBC1709.04c.1:exon:4;SPBC1709.04c.1:exon:3;SPBC1709.04c.1:exon:2	198	4	0	0	1	0	0	0	0	0	0	0	0	0	0	0	0	0	0	0	0	0	0	0	0	0	0	0	0	0	0	0	0	0	0	0	0	0	0	0	0	0	0	0	0	0	0	0
SPBC1709.16c.1:exon:4-SPBC1709.16c.1:exon:1	SPBC1709.16c.1:exon:3;SPBC1709.16c.1:exon:2	617	2	0	0	0	0	0	0	0	0	0	0	0	0	0	0	0	0	0	0	0	0	0	0	0	0	0	0	0	0	0	0	0	0	0	0	0	0	0	0	0	0	0	0	0	0	0	0
SPBC651.01c.1:exon:3-SPBC651.01c.1:exon:1	SPBC651.01c.1:exon:2	95	1	0	0	0	0	0	0	0	0	0	1	0	1	0	0	0	0	0	0	0	0	0	0	0	0	0	0	0	2	0	0	0	0	0	0	0	0	0	0	1	1	0	0	0	0	0	0
SPBC3D6.07.1:exon:3-SPBC3D6.07.1:exon:5	SPBC3D6.07.1:exon:4	116	1	0	0	0	0	0	0	0	0	0	0	0	0	0	0	0	0	0	0	0	0	0	0	0	0	0	0	0	0	0	0	0	0	0	0	0	0	0	0	0	0	1	0	0	0	0	0
SPBC30B4.08.1:exon:1-SPBC30B4.08.1:exon:4	SPBC30B4.08.1:exon:2;SPBC30B4.08.1:exon:3	514	2	0	0	0	0	0	0	0	0	0	0	0	0	0	0	1	1	1	0	0	0	0	0	0	0	0	0	0	0	0	0	0	0	0	0	0	0	0	2	0	1	1	0	0	0	0	1
SPBC27B12.05.1:exon:1-SPBC27B12.05.1:exon:3	SPBC27B12.05.1:exon:2	109	1	0	0	0	0	0	0	0	0	0	0	0	0	0	0	0	0	0	0	0	0	0	0	0	0	0	0	0	0	0	0	0	0	0	0	0	0	0	0	0	0	0	0	0	0	0	0
SPBC27B12.05.1:exon:2-SPBC27B12.05.1:exon:4	SPBC27B12.05.1:exon:3	334	1	1	0	0	0	0	0	0	0	0	0	1	0	0	0	0	1	0	0	0	0	0	0	0	0	0	0	0	0	0	0	0	0	0	0	0	0	0	0	0	0	1	0	0	0	0	0
SPBC27B12.05.1:exon:5-SPBC27B12.05.1:exon:7	SPBC27B12.05.1:exon:6	220	1	0	0	1	0	0	0	0	0	0	0	0	0	0	0	0	0	0	0	0	0	0	0	0	0	0	0	0	0	0	0	0	0	0	0	0	0	0	0	0	0	0	0	0	0	0	0
SPBC8D2.13.1:exon:2-SPBC8D2.13.1:exon:4	SPBC8D2.13.1:exon:3	328	1	1	0	0	0	0	0	0	0	0	0	0	0	0	0	0	0	0	0	0	0	0	0	1	0	0	0	0	0	0	0	0	0	0	0	0	0	0	0	0	0	1	0	0	0	0	0
SPBC17A3.08.1:exon:1-SPBC17A3.08.1:exon:3	SPBC17A3.08.1:exon:2	194	1	0	0	0	0	0	0	0	0	1	0	0	0	0	0	0	0	0	0	0	0	0	0	0	0	0	0	0	0	0	0	0	0	0	0	0	0	0	1	0	0	0	0	0	0	0	0
SPBC17A3.08.1:exon:2-SPBC17A3.08.1:exon:5	SPBC17A3.08.1:exon:3;SPBC17A3.08.1:exon:4	477	2	0	1	0	0	0	0	0	0	0	0	0	0	0	0	0	0	0	0	0	0	0	0	0	0	0	0	0	0	0	0	0	0	0	0	0	0	0	1	0	0	0	0	0	0	0	0
SPBC32H8.09.1:exon:1-SPBC32H8.09.1:exon:3	SPBC32H8.09.1:exon:2	76	1	0	0	0	0	0	0	0	0	0	0	0	0	0	0	0	0	0	0	0	0	0	0	0	0	0	0	0	0	0	0	0	0	0	0	0	0	0	0	0	0	1	0	0	0	0	0
SPBC11B10.09.1:exon:2-SPBC11B10.09.1:exon:4	SPBC11B10.09.1:exon:3	301	1	0	0	1	0	0	0	0	0	0	0	0	1	0	0	0	0	0	0	0	0	0	0	0	0	0	0	0	0	0	0	0	0	0	0	0	0	0	0	1	0	0	0	0	0	0	0
SPBC1D7.01.1:exon:3-SPBC1D7.01.1:exon:1	SPBC1D7.01.1:exon:2	167	1	0	0	0	0	0	0	0	0	0	0	0	0	0	1	0	0	0	1	1	0	0	0	1	0	0	5	2	0	1	0	0	0	3	0	0	0	0	0	0	0	1	0	0	0	0	0
SPBC16E9.15.1:exon:2-SPBC16E9.15.1:exon:4	SPBC16E9.15.1:exon:3	43	1	0	0	0	0	0	0	0	0	0	0	0	0	0	0	2	0	0	1	0	0	0	0	0	0	0	0	0	0	0	0	0	0	0	0	0	0	0	0	0	1	0	0	0	0	0	0
SPBC29A3.14c.1:exon:12-SPBC29A3.14c.1:exon:10	SPBC29A3.14c.1:exon:11	71	1	0	1	1	0	0	0	0	0	0	0	0	0	1	1	0	0	0	0	0	0	0	0	0	1	1	0	0	0	0	0	0	1	0	3	0	0	0	0	0	0	0	0	0	0	0	0
SPBC29A3.14c.1:exon:9-SPBC29A3.14c.1:exon:6	SPBC29A3.14c.1:exon:8;SPBC29A3.14c.1:exon:7	355	2	0	0	0	0	0	0	0	0	0	0	0	0	0	0	0	0	0	0	0	0	0	0	1	0	0	0	0	0	0	0	0	0	0	0	0	0	0	0	0	0	0	0	0	0	1	0
SPBC17G9.02c.1:exon:4-SPBC17G9.02c.1:exon:2	SPBC17G9.02c.1:exon:3	146	1	0	0	0	0	0	0	1	0	0	1	0	0	0	0	0	0	1	0	0	0	0	0	1	0	0	0	0	0	0	0	0	0	0	0	0	0	0	0	1	1	1	0	0	0	1	0
SPBC16H5.13.1:exon:3-SPBC16H5.13.1:exon:1	SPBC16H5.13.1:exon:2	1113	1	1	0	0	0	0	0	0	0	0	0	0	0	0	0	0	0	0	0	0	0	0	0	0	0	0	0	0	0	0	0	0	0	0	0	0	0	0	0	1	0	0	0	0	0	0	0
SPBC12D12.03.1:exon:1-SPBC12D12.03.1:exon:3	SPBC12D12.03.1:exon:2	48	1	0	0	0	0	0	0	0	0	0	0	4	0	0	0	2	3	0	0	0	0	0	0	0	0	0	0	0	0	0	0	0	0	0	0	0	0	0	0	1	3	3	0	0	0	1	1
SPBC12D12.09.1:exon:2-SPBC12D12.09.1:exon:4	SPBC12D12.09.1:exon:3	51	1	0	0	0	0	0	0	0	0	0	0	0	0	1	0	0	0	0	0	0	0	0	0	0	0	0	0	0	0	0	0	0	0	0	1	0	0	0	0	0	0	0	0	0	0	0	1
SPBC12D12.09.1:exon:2-SPBC12D12.09.1:exon:5	SPBC12D12.09.1:exon:3;SPBC12D12.09.1:exon:4	164	2	0	0	0	0	0	0	0	0	0	0	0	0	0	0	0	0	0	0	0	0	0	0	0	0	0	0	0	0	0	0	0	0	0	0	0	0	0	0	0	0	0	0	0	0	0	0
SPBC12D12.09.1:exon:3-SPBC12D12.09.1:exon:7	SPBC12D12.09.1:exon:4;SPBC12D12.09.1:exon:5;SPBC12D12.09.1:exon:6	333	3	0	0	0	0	0	0	0	0	0	0	0	0	0	0	0	0	0	0	0	0	0	0	0	0	0	0	0	0	0	0	0	0	0	0	0	0	0	0	0	0	0	0	0	0	0	0
SPBC19G7.17.1:exon:1-SPBC19G7.17.1:exon:5	SPBC19G7.17.1:exon:2;SPBC19G7.17.1:exon:3;SPBC19G7.17.1:exon:4	214	3	0	0	0	0	0	0	0	0	0	1	1	0	0	0	0	0	0	0	0	0	0	0	0	0	0	0	0	0	0	0	0	0	0	0	0	0	0	1	0	0	1	0	0	0	0	0
SPBC29A10.17.1:exon:1-SPBC29A10.17.1:exon:3	SPBC29A10.17.1:exon:2	35	1	0	0	0	0	0	0	0	0	1	0	0	0	0	0	0	0	0	0	0	0	0	0	0	0	0	0	1	0	0	0	0	0	0	0	0	0	0	0	0	0	0	0	0	0	0	0
SPBC3E7.07c.1:exon:5-SPBC3E7.07c.1:exon:2	SPBC3E7.07c.1:exon:4;SPBC3E7.07c.1:exon:3	83	2	0	0	0	0	0	0	0	0	0	0	0	0	0	0	0	0	0	0	0	0	0	0	0	0	0	0	0	0	0	0	0	0	0	0	0	0	0	0	0	0	0	0	0	0	0	0
SPBC4F6.08c.1:exon:3-SPBC4F6.08c.1:exon:1	SPBC4F6.08c.1:exon:2	102	1	0	0	0	0	0	0	0	0	0	0	0	1	0	0	1	1	0	0	0	0	0	0	0	0	0	0	0	0	0	0	0	0	0	0	0	0	0	0	0	0	1	0	0	0	0	0
SPBC32F12.04.1:exon:3-SPBC32F12.04.1:exon:6	SPBC32F12.04.1:exon:4;SPBC32F12.04.1:exon:5	942	2	0	0	0	0	0	0	0	0	0	0	0	0	0	0	0	0	0	0	0	0	0	0	0	0	0	0	0	0	0	0	0	0	0	0	1	0	0	0	0	0	0	0	0	0	0	0
SPBP4H10.08.1:exon:3-SPBP4H10.08.1:exon:5	SPBP4H10.08.1:exon:4	50	1	0	0	0	0	0	0	0	0	0	0	0	0	0	0	0	0	1	0	0	0	0	0	0	0	0	0	0	0	0	0	0	0	0	0	0	0	0	0	0	0	0	0	0	0	0	0
SPBC1703.08c.1:exon:3-SPBC1703.08c.1:exon:1	SPBC1703.08c.1:exon:2	162	1	0	1	0	0	0	0	0	0	0	1	0	0	0	0	0	1	0	0	0	0	0	0	0	0	0	0	0	0	0	0	0	0	0	0	0	0	0	0	0	1	1	0	0	0	0	0
SPBC1703.12.1:exon:2-SPBC1703.12.1:exon:4	SPBC1703.12.1:exon:3	14	1	0	1	0	0	0	0	0	0	1	0	0	0	0	2	0	0	0	0	0	0	0	0	0	0	0	3	0	3	0	0	0	1	0	1	0	0	3	0	0	0	0	0	0	0	0	1
SPBC13E7.09.1:exon:1-SPBC13E7.09.1:three_prime_UTR:2	SPBC13E7.09.1:exon:2	759	1	0	0	0	0	0	0	0	0	0	0	0	0	0	0	0	0	0	0	0	0	0	0	0	0	0	0	0	0	0	0	0	0	0	0	0	0	0	0	0	0	0	0	0	0	0	0
SPBC30D10.12c.1:exon:1-SPBC30D10.12c.1:exon:3	SPBC30D10.12c.1:exon:2	38	1	0	0	0	0	0	0	0	0	0	0	0	2	0	0	0	0	0	0	0	0	0	0	0	0	0	0	0	0	0	0	0	0	0	0	0	0	0	1	0	0	0	0	0	0	0	0
SPBC609.03.1:exon:1-SPBC609.03.1:exon:5	SPBC609.03.1:exon:2;SPBC609.03.1:exon:3;SPBC609.03.1:exon:4	2278	3	0	0	0	0	0	0	0	0	0	0	0	0	0	0	0	0	0	0	0	0	0	0	0	0	0	0	0	0	0	0	0	0	0	0	0	0	0	0	0	0	0	0	0	0	0	0
SPBC776.04.1:exon:1-SPBC776.04.1:exon:4	SPBC776.04.1:exon:2;SPBC776.04.1:exon:3	204	2	0	0	0	0	0	0	0	0	0	0	0	0	0	0	0	0	0	0	0	0	0	0	0	0	0	0	0	0	0	0	0	0	0	0	0	0	0	0	0	0	0	0	0	0	0	0
SPBC13A2.03.1:exon:1-SPBC13A2.03.1:exon:3	SPBC13A2.03.1:exon:2	140	1	1	0	0	0	0	0	0	0	0	1	0	0	0	0	0	0	0	0	0	0	0	0	0	0	0	0	0	0	0	0	0	0	0	0	0	0	0	1	0	0	0	0	1	0	0	0
SPBC4B4.05.1:exon:1-SPBC4B4.05.1:exon:3	SPBC4B4.05.1:exon:2	72	1	0	0	0	0	0	0	0	0	0	0	1	1	0	0	0	0	0	0	0	0	0	0	1	0	1	0	3	0	0	0	0	0	1	0	2	0	0	0	0	0	0	0	0	0	0	0
SPBC4B4.10c.1:exon:3-SPBC4B4.10c.1:exon:1	SPBC4B4.10c.1:exon:2	175	1	0	0	0	0	0	0	0	0	0	0	0	0	0	0	0	0	0	0	0	0	0	0	0	0	0	0	0	0	0	0	0	0	0	0	0	0	0	0	0	1	0	0	0	0	2	1
SPBC2G2.13c.1:exon:3-SPBC2G2.13c.1:exon:1	SPBC2G2.13c.1:exon:2	53	1	0	0	0	0	0	0	0	0	0	0	0	0	1	0	0	0	0	0	0	0	0	1	0	0	1	0	1	0	0	0	0	0	0	0	0	0	0	0	1	1	0	0	0	0	0	0
SPBC1105.09.1:exon:2-SPBC1105.09.1:exon:4	SPBC1105.09.1:exon:3	30	1	1	0	1	0	0	0	1	0	2	0	1	0	2	0	0	0	1	0	0	0	0	0	0	0	2	0	0	0	0	2	0	0	0	0	0	0	0	0	0	1	4	0	2	0	0	0
SPBC23E6.05.1:exon:1-SPBC23E6.05.1:exon:3	SPBC23E6.05.1:exon:2	161	1	0	0	0	0	0	0	0	0	0	0	0	0	1	0	0	0	0	1	0	0	0	0	0	0	0	0	0	0	0	0	0	0	0	0	0	0	0	0	0	0	0	0	0	0	0	0
SPBC3B9.08c.1:exon:5-SPBC3B9.08c.1:exon:2	SPBC3B9.08c.1:exon:4;SPBC3B9.08c.1:exon:3	118	2	0	0	0	0	0	0	0	0	0	0	0	0	0	0	0	0	0	0	0	0	0	0	0	0	0	0	0	0	0	0	0	0	0	0	0	0	0	0	0	0	0	0	0	0	0	0
SPBC3B9.08c.1:exon:3-SPBC3B9.08c.1:exon:1	SPBC3B9.08c.1:exon:2	88	1	0	0	0	0	0	0	0	0	0	1	1	0	0	0	0	0	0	0	0	0	0	0	0	0	0	0	0	0	0	0	0	0	0	0	0	0	0	0	1	3	3	0	0	0	1	0
SPBC3B9.10.1:exon:3-SPBC3B9.10.1:exon:5	SPBC3B9.10.1:exon:4	252	1	0	0	1	0	0	0	0	0	0	0	0	0	0	0	0	0	0	0	0	0	0	0	0	0	0	0	0	0	0	0	0	0	0	0	0	0	0	0	0	0	0	0	0	0	0	0
SPBC215.02.1:exon:2-SPBC215.02.1:exon:4	SPBC215.02.1:exon:3	106	1	0	0	0	0	0	0	0	0	0	0	0	0	0	0	0	0	0	0	0	0	0	0	0	0	0	0	0	0	0	0	0	0	0	0	0	0	0	0	0	0	0	0	0	0	0	0
SPBC1347.07.1:exon:1-SPBC1347.07.1:exon:4	SPBC1347.07.1:exon:2;SPBC1347.07.1:exon:3	167	2	0	1	0	0	0	0	0	0	0	0	0	0	0	0	0	0	0	0	0	0	0	0	0	0	0	0	0	0	1	0	0	0	0	0	0	0	0	0	0	0	0	0	0	0	0	0
SPBC16G5.12c.1:exon:6-SPBC16G5.12c.1:exon:1	SPBC16G5.12c.1:exon:5;SPBC16G5.12c.1:exon:4;SPBC16G5.12c.1:exon:3;SPBC16G5.12c.1:exon:2	1743	4	1	0	0	0	0	0	0	0	0	0	1	0	0	0	0	0	0	0	0	0	0	0	0	0	0	0	0	0	0	0	0	0	0	0	0	0	0	0	1	0	1	0	0	0	0	0
SPBC16C6.08c.1:exon:4-SPBC16C6.08c.1:exon:2	SPBC16C6.08c.1:exon:3	72	1	0	0	0	0	0	0	0	0	0	0	0	0	0	0	0	2	0	0	0	0	0	0	0	0	0	0	0	0	2	0	0	0	0	0	0	0	0	1	2	0	0	0	0	0	0	0
SPBC800.09.1:exon:2-SPBC800.09.1:exon:4	SPBC800.09.1:exon:3	182	1	0	0	0	0	0	0	0	0	0	1	0	0	0	0	0	0	1	0	0	0	0	0	0	0	0	0	0	0	0	0	0	0	0	0	0	0	0	0	2	0	0	0	0	0	1	0
SPBC1271.12.1:exon:3-SPBC1271.12.1:three_prime_UTR:1	SPBC1271.12.1:exon:2;SPBC1271.12.1:exon:1	1119	2	1	0	1	0	0	0	0	0	0	0	1	0	0	0	0	1	0	0	0	0	0	0	0	0	0	0	0	0	0	0	0	0	0	0	0	0	0	1	1	1	2	0	0	0	1	0
SPBC649.04.1:exon:1-SPBC649.04.1:exon:3	SPBC649.04.1:exon:2	182	1	1	0	0	0	0	0	0	0	0	0	0	0	0	0	0	0	1	0	0	0	0	0	0	0	0	0	0	1	0	0	0	0	0	0	0	0	0	0	1	0	0	0	0	0	0	0
SPBC354.01.1:exon:1-SPBC354.01.1:exon:4	SPBC354.01.1:exon:2;SPBC354.01.1:exon:3	240	2	0	1	0	0	0	0	0	0	0	0	0	0	0	0	0	0	0	0	0	0	0	0	0	1	0	0	0	0	0	0	0	0	0	0	0	0	0	1	1	0	0	0	0	0	0	0
SPBC577.07.1:exon:1-SPBC577.07.1:exon:3	SPBC577.07.1:exon:2	337	1	1	0	0	0	0	0	0	0	0	0	0	0	0	0	0	0	0	0	0	0	0	0	0	0	1	0	1	0	0	0	0	0	0	0	0	0	0	0	0	0	0	0	0	0	0	0
SPBC27B12.08.1:exon:4-SPBC27B12.08.1:exon:7	SPBC27B12.08.1:exon:5;SPBC27B12.08.1:exon:6	1376	2	0	0	0	0	0	0	0	0	0	1	0	0	0	0	0	0	0	0	0	0	0	0	0	0	0	0	0	0	0	0	0	0	0	0	0	0	0	0	0	0	0	0	0	0	0	0
SPBC17A3.02.1:exon:1-SPBC17A3.02.1:exon:3	SPBC17A3.02.1:exon:2	15	1	0	0	0	0	0	0	0	0	0	0	0	0	1	0	0	0	0	0	0	0	0	0	0	0	0	0	0	0	3	0	0	1	0	0	0	0	0	0	0	0	0	0	0	0	1	0
SPBP22H7.06.1:exon:1-SPBP22H7.06.1:exon:3	SPBP22H7.06.1:exon:2	25	1	0	0	0	0	0	0	0	0	0	0	0	0	0	0	0	0	0	0	1	0	0	0	0	0	0	0	0	0	0	0	0	0	0	0	0	0	0	0	0	0	0	0	0	0	0	0
SPBC83.14c.1:exon:3-SPBC83.14c.1:exon:1	SPBC83.14c.1:exon:2	193	1	0	1	3	0	0	1	0	0	0	1	1	0	0	0	0	0	1	0	0	0	0	0	2	0	0	0	0	0	0	0	0	0	0	0	0	0	0	0	2	4	1	0	0	0	0	0
SPBC2F12.05c.1:exon:1-SPBC2F12.05c.1:exon:3	SPBC2F12.05c.1:exon:2	42	1	0	0	0	0	0	0	0	0	0	0	0	0	0	0	0	0	0	0	0	0	0	0	0	0	0	0	0	0	0	0	0	0	0	0	0	0	0	0	0	1	1	0	0	0	0	0
SPBC3H7.01.1:exon:5-SPBC3H7.01.1:exon:2	SPBC3H7.01.1:exon:4;SPBC3H7.01.1:exon:3	411	2	0	0	0	0	0	0	0	0	0	1	0	0	0	0	0	1	0	0	0	0	0	0	0	0	0	0	0	0	0	0	0	0	0	0	0	0	0	0	0	0	0	0	0	0	0	0
SPBC3H7.01.1:exon:5-SPBC3H7.01.1:exon:1	SPBC3H7.01.1:exon:4;SPBC3H7.01.1:exon:3;SPBC3H7.01.1:exon:2	753	3	0	0	1	0	1	0	0	0	0	0	1	0	0	0	0	0	0	0	0	0	0	0	0	0	0	0	0	0	0	0	0	0	0	0	0	0	0	0	0	0	0	0	0	0	1	0
SPBC16E9.09c.1:exon:4-SPBC16E9.09c.1:exon:1	SPBC16E9.09c.1:exon:3;SPBC16E9.09c.1:exon:2	406	2	0	0	1	0	0	0	0	0	0	0	0	0	0	0	0	0	0	0	0	0	0	0	0	0	0	0	0	0	0	0	0	0	0	0	0	0	0	0	0	0	0	0	0	0	0	0
SPBC16E9.10c.1:exon:4-SPBC16E9.10c.1:exon:2	SPBC16E9.10c.1:exon:3	166	1	0	0	0	0	0	0	0	0	0	0	0	0	0	0	0	0	0	0	0	0	0	0	0	0	0	0	0	0	0	0	0	0	0	0	0	0	0	0	0	1	0	0	0	0	2	0
SPBC16E9.12c.1:exon:3-SPBC16E9.12c.1:exon:1	SPBC16E9.12c.1:exon:2	88	1	1	0	0	0	0	0	0	0	0	0	0	0	0	0	0	0	0	0	0	0	0	0	0	0	0	1	0	0	0	0	0	0	0	0	0	0	0	0	0	0	0	0	0	0	0	0
SPBC29A3.10c.1:exon:5-SPBC29A3.10c.1:exon:3	SPBC29A3.10c.1:exon:4	46	1	0	0	0	0	0	0	0	0	0	0	0	0	0	0	0	0	0	0	0	0	0	0	0	0	0	0	0	0	1	0	0	0	0	0	0	0	0	1	0	0	0	0	0	0	0	0
SPBC29A3.10c.1:exon:4-SPBC29A3.10c.1:exon:1	SPBC29A3.10c.1:exon:3;SPBC29A3.10c.1:exon:2	227	2	1	2	4	0	1	2	1	0	0	1	1	0	0	0	0	0	3	0	0	0	0	0	4	0	0	0	0	0	0	0	0	0	0	0	0	0	0	3	4	2	4	0	0	0	4	1
SPBC18E5.02c.1:exon:4-SPBC18E5.02c.1:exon:2	SPBC18E5.02c.1:exon:3	101	1	0	0	0	0	0	0	0	0	0	0	0	0	0	0	0	0	0	0	0	0	0	0	2	0	0	0	0	0	0	0	0	0	0	0	0	0	0	0	0	1	0	0	0	0	0	0
SPBC18E5.02c.1:exon:4-SPBC18E5.02c.1:exon:1	SPBC18E5.02c.1:exon:3;SPBC18E5.02c.1:exon:2	1092	2	0	0	0	0	0	0	0	0	0	0	0	0	0	0	0	0	0	0	0	0	0	0	1	0	0	0	0	0	0	0	0	0	0	0	0	0	0	0	0	2	1	0	0	0	0	1
SPBC18E5.02c.1:exon:3-SPBC18E5.02c.1:exon:1	SPBC18E5.02c.1:exon:2	991	1	1	0	1	0	0	0	0	0	1	2	0	0	0	0	0	0	0	0	0	0	0	0	0	0	0	0	0	0	0	0	0	0	0	0	0	0	0	1	0	0	2	0	0	0	0	0
SPBC23G7.16.1:exon:3-SPBC23G7.16.1:exon:5	SPBC23G7.16.1:exon:4	22	1	0	0	0	0	0	0	0	0	0	0	0	0	0	1	0	0	0	0	0	0	0	0	0	0	0	0	0	0	0	0	0	0	0	0	0	0	0	0	1	0	1	0	0	0	0	0
SPBC1711.04.1:exon:1-SPBC1711.04.1:exon:3	SPBC1711.04.1:exon:2	132	1	2	0	0	0	0	0	0	0	0	0	0	0	1	0	1	0	0	0	2	0	0	0	0	0	0	1	0	0	0	0	0	0	0	0	0	0	0	0	0	0	0	0	0	0	0	3
SPBC19G7.10c.1:exon:5-SPBC19G7.10c.1:exon:3	SPBC19G7.10c.1:exon:4	101	1	0	0	0	0	0	0	0	0	0	0	0	0	0	0	0	0	0	0	0	0	0	0	0	0	0	0	0	0	0	1	0	0	0	0	0	0	0	0	0	0	0	0	0	0	0	0
SPBC19G7.10c.1:exon:5-SPBC19G7.10c.1:exon:2	SPBC19G7.10c.1:exon:4;SPBC19G7.10c.1:exon:3	1890	2	0	0	0	0	0	0	0	0	0	0	1	1	0	0	0	0	0	0	0	0	0	0	0	0	0	0	0	0	0	0	0	0	0	0	0	0	0	0	0	2	3	0	0	0	0	1
SPBC21D10.05c.1:exon:1-SPBC21D10.05c.1:exon:4	SPBC21D10.05c.1:exon:2;SPBC21D10.05c.1:exon:3	202	2	0	0	0	0	0	0	0	0	0	2	0	1	0	0	0	0	0	0	0	0	0	0	0	0	0	0	0	0	0	0	0	0	0	0	0	0	0	0	1	3	1	0	0	0	0	1
SPBC29A10.16c.1:exon:3-SPBC29A10.16c.1:exon:1	SPBC29A10.16c.1:exon:2	154	1	0	0	0	0	0	0	0	0	0	0	0	0	0	0	0	0	0	0	0	0	0	0	0	0	0	0	0	0	0	0	0	0	0	0	0	0	0	0	0	0	1	0	0	0	0	0
SPBC2G5.07c.1:exon:4-SPBC2G5.07c.1:exon:1	SPBC2G5.07c.1:exon:3;SPBC2G5.07c.1:exon:2	356	2	1	0	0	0	0	0	0	0	0	0	1	0	0	0	0	0	0	0	0	0	0	0	0	0	0	0	0	0	0	0	0	0	0	0	0	0	0	0	0	0	1	0	0	0	1	1
SPBC6B1.09c.1:exon:7-SPBC6B1.09c.1:exon:2	SPBC6B1.09c.1:exon:6;SPBC6B1.09c.1:exon:5;SPBC6B1.09c.1:exon:4;SPBC6B1.09c.1:exon:3	372	4	0	0	0	0	0	0	0	0	0	0	0	0	0	0	0	0	2	0	0	0	0	0	0	0	0	0	0	0	0	0	0	0	0	0	0	0	0	0	0	0	0	0	0	0	4	2
SPBC3E7.04c.1:exon:7-SPBC3E7.04c.1:exon:5	SPBC3E7.04c.1:exon:6	201	1	0	0	1	0	0	0	0	0	0	0	0	0	0	0	0	0	0	0	0	0	0	0	0	0	0	0	0	0	0	0	0	0	0	0	0	0	0	0	0	0	0	0	0	0	0	0
SPBC336.14c.1:exon:9-SPBC336.14c.1:exon:3	SPBC336.14c.1:exon:8;SPBC336.14c.1:exon:7;SPBC336.14c.1:exon:6;SPBC336.14c.1:exon:5;SPBC336.14c.1:exon:4	728	5	0	0	0	0	0	0	0	0	0	0	0	0	0	0	0	0	0	0	0	0	0	0	1	0	0	0	0	0	0	0	0	0	0	0	0	0	0	0	0	0	0	0	0	0	0	0
SPBP4H10.20.1:exon:2-SPBP4H10.20.1:exon:4	SPBP4H10.20.1:exon:3	188	1	0	0	0	0	0	0	0	0	0	0	0	0	0	0	0	0	0	0	0	0	0	0	0	0	0	0	0	0	0	0	0	0	0	0	0	0	0	0	0	0	0	0	0	0	0	0
SPBC1703.10.1:exon:2-SPBC1703.10.1:exon:4	SPBC1703.10.1:exon:3	48	1	0	0	0	0	0	0	0	0	0	0	0	1	0	0	0	0	0	0	0	0	0	0	1	0	0	0	0	0	0	0	0	0	0	0	0	0	0	0	0	0	1	0	0	0	0	0
SPBC2A9.07c.1:exon:4-SPBC2A9.07c.1:exon:2	SPBC2A9.07c.1:exon:3	49	1	0	0	0	0	0	0	0	0	0	1	0	0	0	0	0	0	0	0	0	0	0	0	0	0	0	0	0	0	0	0	0	0	0	0	0	0	0	0	0	0	0	0	0	0	0	0
SPBC2A9.07c.1:exon:3-SPBC2A9.07c.1:exon:1	SPBC2A9.07c.1:exon:2	609	1	1	0	0	0	0	0	0	0	0	0	0	0	0	0	0	0	0	0	0	0	0	0	0	0	0	0	0	0	0	0	0	0	0	0	0	0	0	0	0	0	0	0	0	0	0	0
SPBC2D10.20.1:exon:1-SPBC2D10.20.1:exon:6	SPBC2D10.20.1:exon:2;SPBC2D10.20.1:exon:3;SPBC2D10.20.1:exon:4;SPBC2D10.20.1:exon:5	141	4	0	0	1	0	0	0	0	0	0	1	0	1	1	2	0	1	1	0	0	0	0	0	0	0	0	1	0	1	0	0	0	0	0	2	0	0	0	1	0	0	1	0	0	0	0	0
SPBC1778.06c.1:exon:3-SPBC1778.06c.1:exon:1	SPBC1778.06c.1:exon:2	1489	1	0	0	1	0	0	0	0	0	0	0	0	0	0	0	0	0	0	0	0	0	0	0	0	0	0	0	0	0	0	0	0	0	0	0	0	0	0	0	0	0	0	0	0	0	0	0
SPBC776.05.1:exon:5-SPBC776.05.1:exon:7	SPBC776.05.1:exon:6	200	1	0	1	0	0	0	0	0	0	0	0	0	1	0	0	0	0	0	0	0	0	0	0	0	0	0	0	0	0	0	0	0	0	0	0	0	0	0	1	0	0	1	0	0	0	0	0
SPBC776.14.1:exon:1-SPBC776.14.1:exon:4	SPBC776.14.1:exon:2;SPBC776.14.1:exon:3	98	2	0	1	0	0	0	0	0	0	0	0	0	0	0	0	0	0	0	0	0	0	0	0	0	0	0	0	0	0	0	0	0	0	0	0	0	0	0	0	0	0	0	0	0	0	0	0
SPBC776.14.1:exon:2-SPBC776.14.1:exon:4	SPBC776.14.1:exon:3	28	1	0	0	0	0	0	0	0	0	0	1	0	1	0	0	0	0	0	0	0	0	0	0	1	0	0	0	0	0	0	0	0	0	0	0	0	0	0	0	0	0	1	0	0	0	0	1
SPBC776.14.1:exon:8-SPBC776.14.1:exon:10	SPBC776.14.1:exon:9	68	1	0	0	0	0	0	0	0	0	0	1	0	0	0	0	0	0	0	0	0	0	0	0	0	0	0	0	0	0	0	0	0	0	0	0	0	0	0	0	0	1	0	0	0	0	0	0
SPBC21.06c.1:exon:6-SPBC21.06c.1:exon:1	SPBC21.06c.1:exon:5;SPBC21.06c.1:exon:4;SPBC21.06c.1:exon:3;SPBC21.06c.1:exon:2	794	4	0	0	0	0	0	0	1	0	0	1	0	0	0	0	0	0	0	0	0	0	0	0	0	0	0	0	0	0	0	0	0	0	0	0	0	0	0	0	1	0	1	0	0	0	5	1
SPBC21.06c.1:exon:3-SPBC21.06c.1:exon:1	SPBC21.06c.1:exon:2	135	1	0	0	1	0	0	0	0	0	0	0	0	0	0	0	1	0	0	0	0	0	0	0	0	0	0	0	0	0	0	0	0	0	0	0	0	0	0	0	0	0	1	0	0	0	0	0
SPBC3B8.04c.1:exon:2-SPBC3B8.04c.1:exon:4	SPBC3B8.04c.1:exon:3	21	1	0	0	0	0	0	0	2	0	0	0	0	0	0	0	0	0	0	0	0	0	0	0	0	0	0	0	0	0	0	0	0	0	0	0	0	0	0	0	0	0	0	0	0	0	1	0
SPBC16D10.07c.1:exon:6-SPBC16D10.07c.1:exon:3	SPBC16D10.07c.1:exon:5;SPBC16D10.07c.1:exon:4	146	2	0	1	0	0	0	0	0	0	0	0	0	0	0	0	0	0	0	0	0	0	0	0	0	0	0	0	0	0	0	0	0	0	0	0	0	0	0	0	0	0	0	0	0	0	0	0
SPBC16D10.10.1:exon:1-SPBC16D10.10.1:exon:4	SPBC16D10.10.1:exon:2;SPBC16D10.10.1:exon:3	435	2	0	1	0	0	0	0	0	0	0	0	0	0	0	0	0	0	0	0	0	0	0	0	0	0	0	0	0	0	0	0	0	0	0	0	0	0	0	0	0	1	0	0	0	0	0	0
SPBC16D10.10.1:exon:1-SPBC16D10.10.1:exon:6	SPBC16D10.10.1:exon:2;SPBC16D10.10.1:exon:3;SPBC16D10.10.1:exon:4;SPBC16D10.10.1:exon:5	723	4	1	0	0	0	0	0	0	0	0	0	0	0	0	0	0	0	0	0	0	0	0	0	0	0	0	0	0	0	0	0	0	0	0	0	0	0	0	0	0	0	1	0	0	0	0	0
SPBC16D10.10.1:exon:2-SPBC16D10.10.1:exon:4	SPBC16D10.10.1:exon:3	45	1	0	0	0	0	0	0	0	0	0	0	0	0	0	0	0	0	0	0	0	0	0	0	0	0	0	0	0	0	0	0	0	1	0	0	0	0	0	1	0	1	0	0	0	0	0	0
SPBC16D10.10.1:exon:3-SPBC16D10.10.1:exon:6	SPBC16D10.10.1:exon:4;SPBC16D10.10.1:exon:5	288	2	0	0	1	0	0	0	0	0	0	0	0	0	0	0	0	0	0	0	0	0	0	0	0	0	0	0	0	0	0	0	0	0	0	0	0	0	0	0	1	1	0	0	0	0	0	0
SPBP8B7.07c.1:exon:3-SPBP8B7.07c.1:exon:1	SPBP8B7.07c.1:exon:2	140	1	0	0	0	0	0	0	0	0	0	0	0	1	0	0	0	0	0	0	0	0	0	0	0	0	0	0	0	1	1	2	0	0	0	1	0	1	0	0	0	1	0	0	0	0	2	0
SPBP8B7.08c.1:exon:4-SPBP8B7.08c.1:exon:2	SPBP8B7.08c.1:exon:3	124	1	0	0	1	0	0	0	0	0	0	0	0	0	0	0	0	0	1	0	0	0	0	0	0	0	0	0	0	0	0	0	0	0	0	0	0	0	0	0	0	0	0	0	0	0	0	0
SPBP8B7.16c.1:exon:3-SPBP8B7.16c.1:exon:1	SPBP8B7.16c.1:exon:2	1232	1	0	0	0	0	0	0	0	0	0	0	0	0	0	0	0	0	0	0	0	0	0	0	0	0	0	0	0	0	0	0	0	0	0	0	0	0	0	0	0	0	0	0	0	0	0	0
SPBC31F10.13c.1:exon:5-SPBC31F10.13c.1:exon:3	SPBC31F10.13c.1:exon:4	78	1	0	0	0	0	0	0	0	0	0	0	0	0	0	0	0	0	1	0	0	0	0	0	1	0	0	0	0	0	0	0	0	0	0	0	0	0	0	0	0	0	1	0	0	0	0	0
SPBC31F10.13c.1:exon:4-SPBC31F10.13c.1:exon:1	SPBC31F10.13c.1:exon:3;SPBC31F10.13c.1:exon:2	291	2	0	0	0	0	0	0	0	0	0	0	0	0	0	0	0	0	0	1	0	0	0	0	1	0	0	0	0	0	0	0	0	0	0	0	0	0	0	0	0	0	1	0	0	0	0	0
SPBC26H8.07c.1:exon:6-SPBC26H8.07c.1:exon:3	SPBC26H8.07c.1:exon:5;SPBC26H8.07c.1:exon:4	92	2	0	0	0	0	0	0	0	0	0	0	0	0	0	0	0	0	1	0	0	0	0	0	0	0	0	0	0	0	0	0	0	0	0	0	0	0	0	0	0	1	0	0	0	0	1	0
SPBC1861.01c.1:exon:4-SPBC1861.01c.1:exon:1	SPBC1861.01c.1:exon:3;SPBC1861.01c.1:exon:2	1736	2	0	0	0	0	0	0	0	0	0	1	0	0	0	0	0	0	0	0	0	0	0	0	0	0	0	0	0	0	0	0	0	0	0	0	0	0	0	0	0	0	1	0	0	0	0	0
SPBC16A3.09c.1:exon:2-SPBC16A3.09c.1:exon:4	SPBC16A3.09c.1:exon:3	33	1	0	0	0	0	0	0	0	0	0	0	0	0	0	0	0	0	0	0	0	0	0	0	0	0	0	0	0	0	0	0	0	2	0	0	0	0	0	0	0	0	0	0	0	1	0	0
SPBC16A3.09c.1:exon:3-SPBC16A3.09c.1:exon:5	SPBC16A3.09c.1:exon:4	122	1	0	0	0	0	0	0	0	0	0	2	0	0	0	0	0	0	0	0	0	0	0	0	0	0	0	0	0	0	0	0	0	0	0	0	0	0	0	1	1	0	0	0	0	0	0	0
SPBC16A3.06.1:exon:4-SPBC16A3.06.1:exon:2	SPBC16A3.06.1:exon:3	15	1	0	0	1	0	0	0	0	0	0	0	0	0	1	0	0	0	0	0	0	0	0	0	0	0	0	0	0	0	0	0	0	0	0	0	0	0	0	0	0	0	0	0	0	0	0	0
SPBC1539.08.1:exon:2-SPBC1539.08.1:exon:4	SPBC1539.08.1:exon:3	73	1	1	0	0	0	0	0	0	0	0	0	0	0	0	0	0	0	0	0	0	0	0	0	0	0	0	0	0	0	0	0	0	0	0	0	0	0	0	0	0	0	0	0	0	0	0	0
SPBC1289.05c.1:exon:3-SPBC1289.05c.1:exon:1	SPBC1289.05c.1:exon:2	101	1	1	1	0	0	0	0	0	0	0	2	1	0	2	2	0	0	0	1	0	0	0	0	0	3	1	3	1	0	0	0	0	0	1	0	0	0	0	0	1	0	0	0	0	0	0	0
SPCC1235.07.1:exon:1-SPCC1235.07.1:exon:4	SPCC1235.07.1:exon:2;SPCC1235.07.1:exon:3	322	2	1	0	0	0	0	0	0	0	0	0	0	1	0	0	0	0	0	0	0	0	0	0	0	0	0	0	0	0	0	0	0	0	0	0	0	0	0	0	0	0	0	0	0	0	0	0
SPCC1235.11.1:exon:1-SPCC1235.11.1:exon:3	SPCC1235.11.1:exon:2	105	1	1	0	0	0	0	0	0	0	4	1	1	2	1	3	0	1	1	0	2	0	0	0	0	3	4	1	1	3	2	1	0	3	2	5	8	6	0	0	0	1	0	0	0	4	1	0
SPCC594.01.1:exon:1-SPCC594.01.1:exon:3	SPCC594.01.1:exon:2	91	1	1	0	0	0	0	0	0	0	0	0	0	0	0	0	0	1	0	0	0	0	0	0	1	0	0	0	0	0	0	0	0	0	0	0	0	0	0	0	0	0	0	0	0	0	0	0
SPCC970.02.1:exon:4-SPCC970.02.1:exon:2	SPCC970.02.1:exon:3	573	1	0	0	0	0	0	0	0	0	0	0	0	0	0	0	0	0	0	0	0	0	0	0	0	0	0	0	0	0	0	0	0	0	0	0	0	0	0	0	0	0	0	0	0	0	0	0
SPCC970.01.1:exon:8-SPCC970.01.1:exon:3	SPCC970.01.1:exon:7;SPCC970.01.1:exon:6;SPCC970.01.1:exon:5;SPCC970.01.1:exon:4	1438	4	0	0	0	0	0	0	0	0	0	0	0	0	0	0	0	0	0	0	0	0	0	0	0	0	0	0	0	0	0	0	0	0	0	0	0	0	0	0	0	0	0	0	0	0	0	0
SPCC31H12.07.1:exon:2-SPCC31H12.07.1:exon:4	SPCC31H12.07.1:exon:3	32	1	0	0	0	0	0	0	0	0	0	0	0	0	0	0	0	0	0	0	0	0	0	0	1	0	0	0	0	0	0	0	0	0	0	0	0	1	0	0	0	0	0	0	0	0	0	0
SPCC5E4.10c.1:exon:4-SPCC5E4.10c.1:exon:2	SPCC5E4.10c.1:exon:3	111	1	0	0	0	0	0	0	0	0	0	0	0	0	1	0	0	0	0	0	0	0	0	0	0	0	0	0	0	0	0	0	0	0	0	0	0	0	0	0	1	2	1	0	0	0	0	0
SPCPJ732.02c.1:five_prime_UTR:3-SPCPJ732.02c.1:exon:3	SPCPJ732.02c.1:five_prime_UTR:2	42	1	0	0	0	0	0	0	0	0	0	0	0	0	0	0	0	0	0	0	0	0	0	0	0	0	0	0	0	0	0	0	0	0	0	0	0	0	0	0	0	0	0	0	0	0	0	0
SPCC1259.02c.1:five_prime_UTR:3-SPCC1259.02c.1:exon:1	SPCC1259.02c.1:five_prime_UTR:2	303	1	0	1	1	0	0	0	0	0	5	1	0	0	1	0	0	1	1	0	0	0	0	0	0	0	0	2	0	0	0	0	0	0	0	0	0	0	0	0	0	1	0	0	0	7	1	0
SPCC132.03.1:five_prime_UTR:1-SPCC132.03.1:exon:2	SPCC132.03.1:exon:1	499	1	0	0	0	0	0	0	0	0	0	0	0	0	0	0	0	0	0	0	0	0	0	0	0	0	0	0	0	0	0	0	0	0	0	0	0	0	0	0	0	0	0	0	0	0	0	0
SPCC338.05c.1:exon:1-SPCC338.05c.1:exon:5	SPCC338.05c.1:exon:2;SPCC338.05c.1:exon:3;SPCC338.05c.1:exon:4	345	3	0	0	0	0	0	0	0	0	0	0	0	0	0	0	0	0	0	0	0	0	0	0	0	0	0	0	0	0	0	0	0	0	0	0	0	0	0	0	0	0	0	0	0	0	0	0
SPCC338.05c.1:exon:2-SPCC338.05c.1:exon:5	SPCC338.05c.1:exon:3;SPCC338.05c.1:exon:4	206	2	1	1	1	0	0	0	0	0	0	1	0	0	0	0	0	0	0	0	0	0	0	0	0	0	0	0	0	0	0	0	0	0	0	0	0	0	0	0	0	1	0	0	0	0	0	0
SPCC74.03c.1:exon:3-SPCC74.03c.1:exon:1	SPCC74.03c.1:exon:2	352	1	0	1	0	0	0	0	0	0	0	0	0	0	0	0	0	1	0	0	0	0	0	0	0	0	0	0	0	0	0	0	0	0	0	0	0	0	0	0	1	0	1	0	0	0	1	0
SPCC576.14.1:exon:1-SPCC576.14.1:exon:4	SPCC576.14.1:exon:2;SPCC576.14.1:exon:3	362	2	0	0	0	0	0	0	0	0	0	0	0	0	0	0	0	0	0	0	0	0	0	0	0	0	0	0	0	0	0	0	0	0	0	0	0	0	0	0	0	0	0	0	0	0	0	0
SPCC1620.05.1:exon:2-SPCC1620.05.1:exon:5	SPCC1620.05.1:exon:3;SPCC1620.05.1:exon:4	316	2	0	0	1	0	0	0	0	0	0	0	0	0	0	0	0	0	0	0	0	0	0	0	0	0	0	0	0	0	0	0	0	0	0	0	0	0	0	0	0	0	0	0	0	0	0	0
SPCC1620.05.1:exon:2-SPCC1620.05.1:exon:7	SPCC1620.05.1:exon:3;SPCC1620.05.1:exon:4;SPCC1620.05.1:exon:5;SPCC1620.05.1:exon:6	742	4	0	0	0	0	0	0	0	0	0	0	0	0	0	0	0	0	0	0	0	0	0	0	0	0	0	0	0	0	0	0	0	0	0	0	0	0	0	0	0	0	0	0	0	0	0	0
SPCC1919.01.1:exon:4-SPCC1919.01.1:exon:6	SPCC1919.01.1:exon:5	149	1	0	0	2	0	0	0	0	0	0	0	0	0	0	0	0	0	0	0	0	0	0	0	0	0	0	0	0	0	0	0	0	0	0	0	0	0	0	0	0	0	0	0	0	0	0	0
SPCC1919.03c.1:exon:4-SPCC1919.03c.1:exon:2	SPCC1919.03c.1:exon:3	103	1	0	0	0	0	0	0	0	0	0	0	0	0	0	0	0	0	0	0	0	0	0	0	0	0	0	0	0	0	0	0	0	0	0	0	0	0	0	0	0	0	0	0	0	0	0	0
SPCC790.02.1:exon:1-SPCC790.02.1:exon:3	SPCC790.02.1:exon:2	465	1	0	0	0	0	0	0	0	0	0	0	1	0	0	0	0	0	2	0	0	0	0	0	1	0	0	0	0	0	0	0	0	0	0	0	0	0	0	0	0	0	2	0	0	0	0	0
SPCC790.02.1:exon:1-SPCC790.02.1:exon:4	SPCC790.02.1:exon:2;SPCC790.02.1:exon:3	1139	2	0	3	2	0	0	0	0	0	0	5	8	2	0	0	6	2	4	0	0	0	0	0	0	0	0	0	0	0	0	0	0	0	0	0	0	0	0	4	0	12	9	0	0	0	3	1
SPCC1827.07c.1:exon:3-SPCC1827.07c.1:exon:1	SPCC1827.07c.1:exon:2	1092	1	0	0	0	0	0	0	0	0	0	0	0	0	0	0	0	0	0	0	0	0	0	0	0	0	0	0	0	0	0	0	0	0	0	0	0	0	0	0	0	0	0	0	0	0	0	0
SPCC320.04c.1:exon:1-SPCC320.04c.1:exon:5	SPCC320.04c.1:exon:2;SPCC320.04c.1:exon:3;SPCC320.04c.1:exon:4	369	3	0	0	0	0	0	0	0	0	0	0	0	0	0	0	0	0	0	0	0	0	0	0	1	0	0	0	0	0	0	0	0	0	0	0	0	0	0	0	0	0	0	0	0	0	0	0
SPCC320.04c.1:exon:1-SPCC320.04c.1:exon:7	SPCC320.04c.1:exon:2;SPCC320.04c.1:exon:3;SPCC320.04c.1:exon:4;SPCC320.04c.1:exon:5;SPCC320.04c.1:exon:6	478	5	0	0	0	0	0	0	0	0	0	0	0	0	0	0	0	0	0	0	0	0	0	0	0	0	0	0	0	0	0	0	0	0	0	0	0	0	0	0	0	0	0	0	0	0	0	0
SPCC320.04c.1:exon:2-SPCC320.04c.1:exon:13	SPCC320.04c.1:exon:3;SPCC320.04c.1:exon:4;SPCC320.04c.1:exon:5;SPCC320.04c.1:exon:6;SPCC320.04c.1:exon:7;SPCC320.04c.1:exon:8;SPCC320.04c.1:exon:9;SPCC320.04c.1:exon:10;SPCC320.04c.1:exon:11;SPCC320.04c.1:exon:12	1538	10	0	0	0	0	0	0	0	0	0	0	0	0	0	0	0	0	0	0	0	0	0	0	1	0	0	0	0	0	0	0	0	0	0	0	0	0	0	0	0	0	0	0	0	0	0	0
SPCC320.04c.1:exon:3-SPCC320.04c.1:exon:6	SPCC320.04c.1:exon:4;SPCC320.04c.1:exon:5	222	2	0	0	0	0	0	0	0	0	0	0	0	0	0	0	0	0	0	0	0	0	0	0	1	0	0	0	0	0	0	0	0	0	0	0	0	0	0	0	0	0	0	0	0	0	0	0
SPCC320.04c.1:exon:5-SPCC320.04c.1:exon:7	SPCC320.04c.1:exon:6	43	1	0	0	0	0	0	0	0	0	0	0	0	0	0	0	0	0	0	0	0	0	0	0	1	2	0	0	0	0	0	0	0	0	0	0	0	0	0	1	0	0	0	0	0	2	0	2
SPCC970.09.1:exon:7-SPCC970.09.1:exon:1	SPCC970.09.1:exon:6;SPCC970.09.1:exon:5;SPCC970.09.1:exon:4;SPCC970.09.1:exon:3;SPCC970.09.1:exon:2	2597	5	1	0	0	0	0	0	0	0	0	0	1	0	0	0	0	0	0	0	0	0	0	0	0	0	0	0	0	0	0	0	0	0	0	0	0	0	0	0	0	0	0	0	0	0	0	0
SPCC1672.12c.1:exon:7-SPCC1672.12c.1:exon:2	SPCC1672.12c.1:exon:6;SPCC1672.12c.1:exon:5;SPCC1672.12c.1:exon:4;SPCC1672.12c.1:exon:3	362	4	0	0	0	0	0	0	0	0	0	0	0	0	0	0	0	0	0	0	0	0	0	0	1	0	0	0	0	0	0	0	0	0	0	0	0	0	0	0	0	0	0	0	0	0	0	0
SPCC1183.01.1:exon:1-SPCC1183.01.1:exon:3	SPCC1183.01.1:exon:2	162	1	1	0	0	0	0	0	0	0	0	0	0	0	0	0	0	0	0	0	0	0	0	0	0	0	0	0	0	0	0	0	0	0	0	0	0	0	0	0	0	0	0	0	0	0	0	0
SPCC1183.01.1:exon:4-SPCC1183.01.1:exon:6	SPCC1183.01.1:exon:5	1459	1	0	0	0	0	0	0	0	0	0	0	0	0	0	0	0	0	0	0	0	0	0	0	1	0	0	0	0	0	0	0	0	0	0	0	0	0	0	0	0	0	0	0	0	0	0	0
SPCC1183.05c.1:exon:12-SPCC1183.05c.1:exon:1	SPCC1183.05c.1:exon:11;SPCC1183.05c.1:exon:10;SPCC1183.05c.1:exon:9;SPCC1183.05c.1:exon:8;SPCC1183.05c.1:exon:7;SPCC1183.05c.1:exon:6;SPCC1183.05c.1:exon:5;SPCC1183.05c.1:exon:4;SPCC1183.05c.1:exon:3;SPCC1183.05c.1:exon:2	2428	10	1	0	0	0	0	0	0	0	0	0	0	1	0	0	0	0	2	0	0	0	0	0	0	0	0	0	0	0	0	0	0	0	0	0	0	0	0	0	0	1	0	0	0	0	2	0
SPCC1183.05c.1:exon:4-SPCC1183.05c.1:exon:2	SPCC1183.05c.1:exon:3	109	1	0	1	0	0	0	0	0	0	0	0	1	0	0	0	0	0	0	0	0	0	0	0	0	0	0	0	0	0	0	0	0	0	0	0	0	0	0	0	0	0	0	0	0	0	0	0
SPCC16C4.01.1:exon:1-SPCC16C4.01.1:exon:5	SPCC16C4.01.1:exon:2;SPCC16C4.01.1:exon:3;SPCC16C4.01.1:exon:4	817	3	0	0	1	0	0	0	0	0	0	0	0	0	0	0	0	0	0	0	0	0	0	0	0	0	0	0	0	0	0	0	0	0	0	0	0	0	0	0	0	0	1	0	0	0	0	0
SPCC18B5.10c.1:exon:6-SPCC18B5.10c.1:exon:2	SPCC18B5.10c.1:exon:5;SPCC18B5.10c.1:exon:4;SPCC18B5.10c.1:exon:3	406	3	0	0	0	0	0	0	0	0	0	0	0	0	0	0	0	0	0	0	0	0	0	0	1	0	0	0	0	0	0	0	0	0	0	0	0	0	0	0	0	0	0	0	0	0	0	0
SPCC1393.05.1:exon:2-SPCC1393.05.1:exon:4	SPCC1393.05.1:exon:3	49	1	0	0	0	0	0	0	0	0	0	0	0	0	0	0	0	0	0	0	0	0	0	0	0	0	0	0	0	0	0	0	0	0	0	0	0	0	0	0	0	0	0	0	0	0	0	0
SPCC16A11.05c.1:exon:5-SPCC16A11.05c.1:exon:3	SPCC16A11.05c.1:exon:4	26	1	0	0	0	0	0	0	0	0	0	0	0	0	0	0	0	0	0	0	0	0	0	0	1	1	0	0	1	0	0	0	0	0	0	0	0	0	0	0	0	0	1	0	0	0	0	0
SPCC16A11.10c.1:exon:3-SPCC16A11.10c.1:exon:1	SPCC16A11.10c.1:exon:2	92	1	0	0	0	0	0	0	0	0	0	0	0	0	0	0	0	0	0	0	0	0	0	0	0	0	0	0	0	0	0	0	0	0	0	0	0	0	0	0	0	0	0	0	0	0	0	0
SPCC16A11.16c.1:exon:3-SPCC16A11.16c.1:exon:1	SPCC16A11.16c.1:exon:2	85	1	1	1	1	0	0	0	0	0	0	0	1	0	0	0	0	0	0	0	0	0	0	0	0	0	0	0	0	0	0	0	0	0	0	0	0	0	1	0	0	1	0	0	0	1	0	0
SPCC24B10.11c.1:exon:3-SPCC24B10.11c.1:exon:1	SPCC24B10.11c.1:exon:2	151	1	0	1	0	0	0	0	0	0	0	0	1	0	0	0	1	0	0	0	0	0	0	0	1	0	0	0	0	0	0	0	0	0	0	0	0	0	0	0	0	2	1	0	0	0	0	0
SPCC825.02.1:exon:1-SPCC825.02.1:exon:3	SPCC825.02.1:exon:2	84	1	0	0	0	0	0	0	0	0	0	0	1	0	1	0	0	0	0	0	0	0	0	0	1	0	0	0	1	0	0	0	0	0	0	0	0	0	0	0	1	0	1	0	0	0	0	0
SPCC1259.09c.1:exon:5-SPCC1259.09c.1:exon:3	SPCC1259.09c.1:exon:4	45	1	1	0	0	0	0	0	0	0	0	0	0	0	0	2	0	0	0	1	0	0	0	0	0	0	0	0	0	0	0	0	0	0	0	0	0	0	0	0	0	0	0	0	0	0	0	1
SPCC4B3.02c.1:exon:1-SPCC4B3.02c.1:exon:3	SPCC4B3.02c.1:exon:2	47	1	0	0	0	0	0	0	0	0	0	0	1	0	0	0	0	0	0	0	0	0	0	0	0	0	0	0	0	0	0	0	0	0	0	0	0	0	0	0	0	1	0	0	0	0	0	0
SPCC61.04c.1:exon:3-SPCC61.04c.1:exon:1	SPCC61.04c.1:exon:2	293	1	0	0	1	0	0	0	0	0	0	1	0	0	0	0	0	0	0	0	0	0	0	0	0	0	0	0	0	0	0	0	0	0	0	0	0	0	0	0	0	0	0	0	0	0	0	0
SPCC188.02.1:exon:2-SPCC188.02.1:exon:6	SPCC188.02.1:exon:3;SPCC188.02.1:exon:4;SPCC188.02.1:exon:5	1268	3	0	0	0	0	0	0	0	0	0	1	1	0	0	0	0	1	0	0	0	0	0	0	0	0	0	0	0	0	0	0	0	0	0	0	0	0	0	0	1	1	1	0	0	0	0	0
SPCC188.02.1:exon:3-SPCC188.02.1:exon:5	SPCC188.02.1:exon:4	755	1	0	0	1	0	0	0	0	0	0	1	0	0	0	0	0	0	1	0	0	0	0	0	2	0	0	0	0	0	0	0	0	0	0	0	0	0	0	1	1	1	0	0	0	0	1	3
SPCC188.02.1:exon:3-SPCC188.02.1:exon:6	SPCC188.02.1:exon:4;SPCC188.02.1:exon:5	1054	2	0	0	1	0	0	0	0	0	0	0	1	0	0	0	0	0	0	0	0	0	0	0	0	0	0	0	0	0	0	0	0	0	0	0	0	0	0	0	0	2	1	0	0	0	0	0
SPCC777.10c.1:exon:5-SPCC777.10c.1:exon:2	SPCC777.10c.1:exon:4;SPCC777.10c.1:exon:3	185	2	0	0	0	0	0	0	0	0	0	0	0	0	0	0	0	0	0	1	0	0	0	0	0	0	0	0	0	0	0	0	0	0	0	0	0	0	1	0	0	0	0	0	0	0	0	0
SPCC1450.12.1:exon:1-SPCC1450.12.1:exon:3	SPCC1450.12.1:exon:2	294	1	0	0	0	0	0	0	0	0	0	0	0	0	0	0	0	0	0	0	0	0	0	0	0	0	0	0	0	0	0	0	0	0	0	0	0	0	0	0	0	0	0	0	0	0	0	0
SPCC1442.06.1:exon:2-SPCC1442.06.1:exon:4	SPCC1442.06.1:exon:3	155	1	0	0	0	0	0	0	0	0	0	0	0	0	0	0	0	0	1	0	0	0	0	0	2	0	0	0	0	0	0	0	0	0	0	0	0	0	0	2	0	1	1	0	0	0	0	0
SPCC1442.08c.1:exon:5-SPCC1442.08c.1:exon:3	SPCC1442.08c.1:exon:4	16	1	1	0	0	0	0	0	0	0	0	0	0	0	1	0	0	0	0	0	0	0	0	0	0	0	1	0	0	0	0	0	0	0	0	0	1	0	0	0	0	0	0	0	0	0	0	0
SPCC1442.08c.1:exon:5-SPCC1442.08c.1:exon:1	SPCC1442.08c.1:exon:4;SPCC1442.08c.1:exon:3;SPCC1442.08c.1:exon:2	150	3	0	0	0	0	0	0	0	0	0	0	0	0	0	0	0	0	0	0	0	0	0	0	0	0	0	0	0	0	0	0	0	0	0	0	0	0	0	0	0	0	0	0	0	0	0	0
SPCC1442.08c.1:exon:3-SPCC1442.08c.1:exon:1	SPCC1442.08c.1:exon:2	108	1	0	1	0	0	0	0	0	0	0	0	0	0	0	0	0	0	0	0	0	0	0	0	0	0	0	0	0	0	0	0	0	0	0	0	0	0	0	0	0	0	0	0	0	0	0	0
SPCC1442.12.1:exon:1-SPCC1442.12.1:exon:3	SPCC1442.12.1:exon:2	232	1	0	1	0	0	0	0	0	0	0	0	0	0	0	0	0	0	0	0	0	0	0	0	0	0	0	0	0	0	0	0	0	0	0	0	1	0	0	0	0	0	0	0	0	0	0	0
SPCC1739.09c.1:exon:6-SPCC1739.09c.1:exon:4	SPCC1739.09c.1:exon:5	25	1	0	2	0	0	0	0	0	0	0	0	0	0	0	0	0	0	1	0	0	0	0	0	0	0	0	0	0	0	0	0	0	0	0	0	0	0	0	0	0	0	0	0	0	0	0	0
SPCC126.02c.1:exon:5-SPCC126.02c.1:exon:1	SPCC126.02c.1:exon:4;SPCC126.02c.1:exon:3;SPCC126.02c.1:exon:2	1497	3	0	0	0	0	0	0	0	0	0	0	0	0	0	0	0	0	0	0	0	0	0	0	0	0	0	0	0	0	0	0	0	0	0	0	0	0	0	0	0	0	0	0	0	0	0	0
SPCC1840.04.1:exon:2-SPCC1840.04.1:exon:6	SPCC1840.04.1:exon:3;SPCC1840.04.1:exon:4;SPCC1840.04.1:exon:5	291	3	0	0	0	0	0	0	0	0	0	0	1	0	0	0	0	0	0	0	0	0	0	0	0	0	0	0	0	0	0	0	0	0	0	0	0	0	0	0	0	0	0	0	0	0	0	0
SPCC965.03.1:exon:1-SPCC965.03.1:exon:3	SPCC965.03.1:exon:2	118	1	0	0	0	0	0	0	0	0	0	0	0	0	0	0	0	0	0	0	0	0	0	0	1	0	0	0	0	0	0	0	0	0	0	0	0	0	0	0	0	2	0	0	0	0	0	0
SPAC222.16c.1:exon:7-SPAC222.16c.1:exon:1	SPAC222.16c.1:exon:6;SPAC222.16c.1:exon:5;SPAC222.16c.1:exon:4;SPAC222.16c.1:exon:3;SPAC222.16c.1:exon:2	536	5	0	0	0	1	0	0	0	0	0	0	0	0	0	0	0	0	1	0	0	0	0	0	0	0	0	0	0	0	0	0	0	0	0	0	0	0	0	0	0	0	0	0	0	0	0	0
SPAC23C4.02.1:exon:1-SPAC23C4.02.1:exon:5	SPAC23C4.02.1:exon:2;SPAC23C4.02.1:exon:3;SPAC23C4.02.1:exon:4	370	3	0	0	0	0	0	0	0	0	0	0	0	0	0	0	0	0	0	0	0	0	0	0	0	0	0	0	0	0	0	0	0	0	0	0	0	0	0	0	0	0	0	0	0	0	0	0
SPAC20G8.08c.1:exon:4-SPAC20G8.08c.1:exon:1	SPAC20G8.08c.1:exon:3;SPAC20G8.08c.1:exon:2	933	2	0	0	0	0	0	0	1	0	0	0	1	0	0	0	0	0	0	0	0	0	0	0	0	0	0	0	0	0	0	0	0	0	0	0	0	0	0	0	0	0	0	0	0	0	0	0
SPAC664.02c.1:exon:4-SPAC664.02c.1:exon:1	SPAC664.02c.1:exon:3;SPAC664.02c.1:exon:2	399	2	0	0	0	0	0	0	0	0	0	1	0	0	0	0	0	0	0	0	0	0	0	0	0	0	0	0	0	0	0	0	0	0	0	0	0	0	0	0	0	0	1	0	0	0	0	0
SPAC9G1.05.1:exon:3-SPAC9G1.05.1:exon:6	SPAC9G1.05.1:exon:4;SPAC9G1.05.1:exon:5	92	2	0	0	0	0	0	0	0	0	0	0	2	0	0	0	0	0	1	0	0	0	0	0	0	0	0	0	0	0	0	0	0	0	0	0	0	0	0	0	0	0	0	0	0	0	0	0
SPAC22H10.03c.1:exon:4-SPAC22H10.03c.1:exon:1	SPAC22H10.03c.1:exon:3;SPAC22H10.03c.1:exon:2	245	2	0	0	0	0	0	0	0	0	0	2	0	0	0	0	0	0	0	0	0	0	0	0	0	0	0	0	0	0	0	0	0	0	0	0	0	0	0	0	0	0	0	0	0	0	0	0
SPAC8E11.04c.1:exon:2-SPAC8E11.04c.1:exon:5	SPAC8E11.04c.1:exon:3;SPAC8E11.04c.1:exon:4	194	2	0	0	0	0	1	0	0	0	0	0	0	0	0	0	0	0	0	0	0	0	0	0	0	0	0	0	0	0	0	0	0	0	0	0	0	0	0	0	0	0	0	0	0	0	0	0
SPAC15A10.13.1:exon:1-SPAC15A10.13.1:exon:7	SPAC15A10.13.1:exon:2;SPAC15A10.13.1:exon:3;SPAC15A10.13.1:exon:4;SPAC15A10.13.1:exon:5;SPAC15A10.13.1:exon:6	1406	5	0	0	0	0	0	0	0	0	0	0	0	0	0	0	0	0	0	0	0	0	0	0	0	0	0	0	0	0	0	0	0	0	0	0	0	0	0	0	1	0	0	0	0	0	1	1
SPAC23D3.13c.1:exon:4-SPAC23D3.13c.1:exon:2	SPAC23D3.13c.1:exon:3	67	1	0	0	0	0	0	0	0	0	0	0	0	1	0	0	1	1	0	0	0	0	0	0	0	0	0	0	0	0	1	0	0	0	0	0	0	0	0	0	0	0	1	0	0	0	1	0
SPAC19B12.05c.1:exon:5-SPAC19B12.05c.1:exon:1	SPAC19B12.05c.1:exon:4;SPAC19B12.05c.1:exon:3;SPAC19B12.05c.1:exon:2	1569	3	0	0	0	0	0	0	0	0	0	0	1	0	0	0	0	0	2	0	0	0	0	0	0	0	0	0	0	0	0	0	0	0	0	0	0	0	0	0	1	3	0	0	0	0	0	0
SPAC890.07c.1:exon:9-SPAC890.07c.1:exon:1	SPAC890.07c.1:exon:8;SPAC890.07c.1:exon:7;SPAC890.07c.1:exon:6;SPAC890.07c.1:exon:5;SPAC890.07c.1:exon:4;SPAC890.07c.1:exon:3;SPAC890.07c.1:exon:2	968	7	0	0	0	0	0	0	0	0	0	0	0	0	0	0	0	0	0	0	1	0	0	0	0	0	0	0	0	0	0	0	0	0	0	0	0	0	0	0	0	0	0	0	0	0	0	0
SPAC14C4.06c.1:exon:3-SPAC14C4.06c.1:exon:1	SPAC14C4.06c.1:exon:2	99	1	0	0	0	0	0	0	1	0	0	2	0	0	0	0	0	0	0	0	0	0	0	0	0	0	0	0	0	0	0	0	0	0	0	0	0	0	0	0	0	0	0	0	0	0	0	0
SPAC4G9.14.1:exon:2-SPAC4G9.14.1:exon:5	SPAC4G9.14.1:exon:3;SPAC4G9.14.1:exon:4	152	2	0	0	0	0	0	0	1	0	0	0	0	0	0	0	0	0	0	0	0	0	0	0	0	0	0	0	0	0	0	0	0	0	0	0	0	0	0	0	0	0	0	0	0	0	0	0
SPAC31G5.15.1:exon:6-SPAC31G5.15.1:exon:8	SPAC31G5.15.1:exon:7	142	1	0	0	0	0	0	0	0	0	0	0	1	0	0	0	0	0	0	0	0	0	0	0	0	0	0	0	0	0	0	0	0	0	0	0	0	0	0	0	2	1	2	0	0	0	2	0
SPAC17G6.15c.1:exon:3-SPAC17G6.15c.1:exon:1	SPAC17G6.15c.1:exon:2	336	1	0	0	0	1	0	0	0	0	0	5	0	0	0	0	0	0	0	0	0	0	0	0	0	0	0	0	0	0	0	0	0	0	0	0	0	0	0	0	1	1	1	0	0	0	0	0
SPAC12B10.09.1:exon:1-SPAC12B10.09.1:exon:3	SPAC12B10.09.1:exon:2	157	1	0	0	0	0	0	0	0	0	1	0	0	1	0	0	0	0	0	0	0	0	0	0	0	0	5	0	1	0	0	0	0	0	0	0	0	0	0	0	0	1	0	0	0	0	0	0
SPAC1006.03c.1:exon:3-SPAC1006.03c.1:exon:1	SPAC1006.03c.1:exon:2	1727	1	0	0	0	0	0	0	0	0	0	0	0	0	0	0	0	0	0	0	0	0	0	0	0	0	0	0	0	0	0	0	0	0	0	0	0	0	0	0	0	0	0	0	0	0	0	0
SPAC11E3.15.1:exon:1-SPAC11E3.15.1:exon:3	SPAC11E3.15.1:exon:2	252	1	0	0	0	1	0	0	0	0	0	0	0	0	0	0	0	0	0	0	0	0	0	0	0	0	0	0	0	0	0	0	0	0	0	0	0	0	0	0	0	0	0	0	0	0	0	0
SPBC3B8.02.1:exon:3-SPBC3B8.02.1:exon:1	SPBC3B8.02.1:exon:2	30	1	0	0	0	1	0	0	0	0	0	0	0	0	0	0	0	0	1	0	0	0	0	0	0	0	0	0	0	0	0	0	0	0	0	0	0	0	0	0	0	1	1	0	0	0	0	0
SPBC2G2.13c.1:exon:4-SPBC2G2.13c.1:exon:1	SPBC2G2.13c.1:exon:3;SPBC2G2.13c.1:exon:2	542	2	0	0	0	0	0	0	0	0	0	0	0	0	0	0	0	0	0	0	0	0	0	0	0	0	0	0	0	0	0	0	0	0	0	0	0	0	0	0	0	0	0	0	0	0	0	1
SPBC31F10.12.1:exon:2-SPBC31F10.12.1:exon:4	SPBC31F10.12.1:exon:3	98	1	0	0	0	0	0	0	0	0	0	0	0	0	0	1	0	0	0	0	0	0	0	0	0	0	0	0	0	0	0	0	0	0	0	0	0	0	0	0	0	0	0	0	0	0	0	0
SPBC31F10.12.1:exon:3-SPBC31F10.12.1:exon:6	SPBC31F10.12.1:exon:4;SPBC31F10.12.1:exon:5	263	2	0	0	0	0	1	0	0	0	0	0	0	0	0	0	0	0	1	0	0	0	0	0	0	0	0	0	0	0	0	0	0	0	0	0	0	0	0	1	0	0	0	0	0	0	0	1
SPBC1347.07.1:exon:2-SPBC1347.07.1:exon:4	SPBC1347.07.1:exon:3	86	1	0	0	0	1	0	0	0	0	0	0	0	0	0	0	0	0	0	0	0	0	0	0	0	0	0	0	0	0	0	0	0	0	0	0	0	0	0	1	0	0	0	0	0	1	0	0
SPBC17A3.03c.1:exon:4-SPBC17A3.03c.1:exon:2	SPBC17A3.03c.1:exon:3	86	1	0	0	0	1	0	0	0	0	0	0	0	0	0	0	0	0	0	0	0	0	0	0	0	0	0	0	0	0	0	0	0	0	0	0	0	0	0	0	0	0	0	0	0	0	0	0
SPBC2F12.05c.1:exon:1-SPBC2F12.05c.1:exon:4	SPBC2F12.05c.1:exon:2;SPBC2F12.05c.1:exon:3	215	2	0	0	0	0	0	0	0	0	0	0	0	0	0	0	0	0	0	0	0	0	0	0	0	0	0	0	0	0	0	0	0	0	0	0	0	0	0	0	0	0	0	0	0	0	0	0
SPBC6B1.05c.1:exon:4-SPBC6B1.05c.1:exon:2	SPBC6B1.05c.1:exon:3	156	1	0	0	0	0	0	0	0	0	0	0	0	0	0	0	0	0	0	0	0	0	0	0	0	0	0	0	0	0	0	0	0	0	0	0	0	0	0	0	0	0	0	0	0	0	1	0
SPBC4B4.09.1:exon:5-SPBC4B4.09.1:exon:7	SPBC4B4.09.1:exon:6	288	1	0	0	0	1	0	0	0	0	0	0	0	0	0	0	0	0	0	0	0	0	0	0	0	0	0	0	0	0	0	0	0	0	0	0	0	0	0	0	0	0	0	0	0	0	0	0
SPBC16D10.10.1:exon:1-SPBC16D10.10.1:exon:3	SPBC16D10.10.1:exon:2	390	1	0	0	0	0	0	0	0	0	0	0	0	0	0	0	0	1	0	0	0	0	0	0	0	0	0	0	0	0	0	0	0	1	0	0	2	1	0	0	0	1	0	0	0	0	0	0
SPBC26H8.07c.1:exon:5-SPBC26H8.07c.1:exon:3	SPBC26H8.07c.1:exon:4	42	1	0	0	0	0	0	0	0	0	0	0	1	0	0	0	0	0	0	0	0	0	0	0	0	0	0	0	0	0	0	0	0	0	0	0	0	0	0	1	1	0	1	0	0	0	0	1
SPCC1393.05.1:exon:8-SPCC1393.05.1:exon:10	SPCC1393.05.1:exon:9	282	1	0	0	0	0	0	0	0	0	0	0	0	0	0	0	0	0	0	0	0	0	0	0	0	0	0	0	0	0	0	0	0	0	0	0	0	0	0	0	0	0	0	0	0	0	0	0
SPCC1450.12.1:exon:2-SPCC1450.12.1:exon:4	SPCC1450.12.1:exon:3	508	1	0	0	0	0	0	0	0	0	0	0	0	0	0	0	0	0	0	0	0	0	0	0	0	0	0	0	0	0	0	0	0	0	0	0	0	0	0	1	0	0	1	0	0	0	0	0
SPMIT.01.1:exon:1-SPMIT.01.1:exon:3	SPMIT.01.1:exon:2	345	1	0	0	0	0	0	0	0	0	0	0	0	0	0	0	1	0	0	0	0	0	0	0	0	0	0	0	0	0	0	0	0	0	0	0	0	0	0	0	1	1	0	0	0	0	0	0
SPAC630.03.1:exon:1-SPAC630.03.1:exon:3	SPAC630.03.1:exon:2	24	1	0	0	0	0	0	0	0	0	0	0	0	0	0	0	0	0	0	0	0	0	0	0	0	0	0	0	1	0	0	0	0	3	0	0	0	0	0	1	0	0	0	0	0	0	0	0
SPAC31A2.05c.1:exon:4-SPAC31A2.05c.1:exon:2	SPAC31A2.05c.1:exon:3	136	1	0	0	0	0	0	0	0	0	0	0	0	0	0	0	0	0	0	0	0	0	0	0	0	0	0	0	0	0	0	0	0	0	0	0	0	0	0	0	0	2	0	0	0	0	0	0
SPAC31A2.10.1:exon:2-SPAC31A2.10.1:exon:4	SPAC31A2.10.1:exon:3	35	1	0	0	0	0	0	0	0	0	0	0	0	0	0	0	0	0	0	0	0	0	0	0	0	0	0	0	0	0	0	0	0	0	0	0	0	0	0	0	0	1	0	0	0	0	0	0
SPAC1F3.09.1:exon:1-SPAC1F3.09.1:exon:3	SPAC1F3.09.1:exon:2	167	1	0	0	0	0	0	0	0	0	0	0	0	0	0	0	0	0	0	0	0	0	0	0	0	0	0	0	0	0	0	0	0	0	0	0	0	0	0	0	0	0	0	0	0	0	0	0
SPAC2G11.11c.1:exon:3-SPAC2G11.11c.1:exon:1	SPAC2G11.11c.1:exon:2	69	1	0	0	0	0	0	0	0	0	1	0	0	0	0	0	0	0	1	0	0	0	0	0	0	0	0	1	0	0	0	0	0	0	0	0	0	0	0	0	0	0	0	0	0	0	0	0
SPAC222.16c.1:exon:6-SPAC222.16c.1:exon:4	SPAC222.16c.1:exon:5	147	1	0	0	0	0	0	0	0	0	0	0	0	0	0	0	0	1	0	0	0	0	0	0	0	0	0	0	0	0	0	0	0	0	0	0	0	0	0	0	0	0	0	0	0	0	0	0
SPAC22A12.09c.1:exon:5-SPAC22A12.09c.1:exon:2	SPAC22A12.09c.1:exon:4;SPAC22A12.09c.1:exon:3	624	2	0	0	0	0	0	0	0	0	0	0	0	0	0	0	0	0	0	0	0	0	0	0	0	0	0	0	0	0	0	0	0	0	0	0	0	0	0	0	0	0	0	0	0	0	0	0
SPAC57A10.08c.1:exon:3-SPAC57A10.08c.1:exon:1	SPAC57A10.08c.1:exon:2	111	1	0	0	0	0	0	0	0	0	0	0	0	0	0	0	0	0	0	0	0	0	0	0	0	0	0	0	0	0	0	0	0	0	0	0	0	0	0	0	0	0	0	0	0	0	0	0
SPAC167.04.1:exon:4-SPAC167.04.1:exon:1	SPAC167.04.1:exon:3;SPAC167.04.1:exon:2	111	2	0	0	0	0	0	0	0	0	0	0	0	0	0	0	0	0	0	0	0	0	0	0	0	0	0	0	0	0	0	0	0	0	0	0	0	0	0	0	0	0	0	0	0	0	0	0
SPAC824.09c.1:exon:4-SPAC824.09c.1:exon:1	SPAC824.09c.1:exon:3;SPAC824.09c.1:exon:2	124	2	0	0	0	0	0	0	0	0	0	0	0	0	0	0	0	0	1	0	0	0	0	0	0	0	0	0	0	0	0	0	0	0	0	0	0	0	0	0	1	0	0	0	0	0	0	0
SPAC664.02c.1:exon:3-SPAC664.02c.1:exon:1	SPAC664.02c.1:exon:2	210	1	0	0	0	0	0	0	0	0	0	0	1	0	0	0	0	0	0	0	0	0	0	0	0	0	0	0	0	0	0	0	0	0	0	0	0	0	0	0	0	0	1	0	0	0	0	0
SPAC23C11.11.1:exon:3-SPAC23C11.11.1:exon:5	SPAC23C11.11.1:exon:4	302	1	0	0	0	0	0	0	0	0	0	0	0	0	0	0	0	0	0	0	0	0	0	0	0	0	0	0	0	0	0	0	0	0	0	0	0	0	0	0	0	0	1	0	1	0	0	0
SPAC15F9.03c.1:exon:5-SPAC15F9.03c.1:exon:3	SPAC15F9.03c.1:exon:4	83	1	0	0	0	0	0	0	0	0	0	0	0	0	0	0	0	0	0	0	0	0	0	0	0	0	0	0	0	0	0	0	0	0	0	0	0	0	0	0	0	0	0	0	0	0	0	0
SPAC1B9.02c.1:exon:4-SPAC1B9.02c.1:exon:2	SPAC1B9.02c.1:exon:3	691	1	0	0	0	0	0	0	0	0	0	0	0	0	0	0	0	0	0	0	0	0	0	0	0	0	0	0	0	0	0	0	0	0	0	0	0	0	0	0	0	0	0	0	0	0	0	0
SPAC823.16c.1:exon:4-SPAC823.16c.1:exon:2	SPAC823.16c.1:exon:3	107	1	0	0	0	0	0	0	0	0	0	0	0	0	0	0	0	0	0	0	0	0	0	2	0	0	0	2	0	0	0	0	0	0	0	0	0	0	0	0	0	0	0	0	0	0	0	0
SPAC3F10.19.1:exon:1-SPAC3F10.19.1:exon:3	SPAC3F10.19.1:exon:2	8	1	0	0	0	0	0	0	0	0	0	0	0	0	0	0	0	0	0	0	0	0	0	0	0	0	0	0	0	0	0	0	0	0	0	0	0	0	0	0	0	0	0	0	0	1	0	0
SPAC6G9.07c.1:exon:4-SPAC6G9.07c.1:exon:2	SPAC6G9.07c.1:exon:3	203	1	0	0	0	0	0	0	0	0	0	0	0	0	1	0	0	0	0	0	0	0	0	0	0	0	0	0	0	1	0	1	0	0	0	0	0	0	0	0	0	0	1	0	0	0	0	0
SPAC328.05.1:exon:4-SPAC328.05.1:exon:6	SPAC328.05.1:exon:5	393	1	0	0	0	0	0	0	0	0	0	0	0	0	0	0	0	0	0	0	0	0	0	0	0	0	0	0	0	0	0	0	0	0	0	0	0	0	0	2	0	0	0	0	0	0	0	0
SPAC1B1.04c.1:exon:5-SPAC1B1.04c.1:exon:2	SPAC1B1.04c.1:exon:4;SPAC1B1.04c.1:exon:3	827	2	0	0	0	0	0	0	0	0	0	0	0	0	0	0	0	0	0	0	0	0	0	0	0	0	0	0	0	0	0	0	0	0	0	0	0	0	0	1	0	0	0	0	0	0	0	0
SPAC17G6.16c.1:exon:5-SPAC17G6.16c.1:exon:3	SPAC17G6.16c.1:exon:4	129	1	0	0	0	0	0	0	0	0	0	1	0	0	0	0	0	0	0	0	0	0	0	0	0	0	0	0	0	0	0	0	0	0	0	0	0	0	0	0	0	0	0	0	0	0	0	0
SPAC8C9.14.1:exon:1-SPAC8C9.14.1:exon:3	SPAC8C9.14.1:exon:2	90	1	0	0	0	0	0	0	0	0	0	0	0	0	0	0	0	0	0	0	0	0	0	0	0	0	0	0	0	0	0	0	0	0	0	0	0	0	0	0	1	0	1	1	0	0	0	0
SPAP7G5.02c.1:exon:3-SPAP7G5.02c.1:exon:1	SPAP7G5.02c.1:exon:2	41	1	0	0	0	0	0	0	0	0	0	0	0	0	1	0	0	0	0	0	5	0	0	1	0	0	0	0	0	0	1	10	2	0	0	0	0	0	0	1	0	1	0	0	0	0	0	0
SPAC2C4.10c.1:exon:3-SPAC2C4.10c.1:exon:1	SPAC2C4.10c.1:exon:2	213	1	0	0	0	0	0	0	0	0	0	0	0	0	0	0	0	0	0	0	0	0	0	0	0	0	0	0	0	0	0	0	0	0	0	0	0	0	0	0	0	0	0	0	0	0	0	0
SPAC22F8.07c.1:exon:5-SPAC22F8.07c.1:exon:3	SPAC22F8.07c.1:exon:4	112	1	0	0	0	0	0	0	0	0	0	0	0	2	0	0	0	0	0	0	0	0	0	0	0	0	0	0	0	0	0	0	0	0	0	0	0	0	0	0	0	0	0	0	0	0	0	0
SPAC20G4.04c.1:exon:4-SPAC20G4.04c.1:exon:2	SPAC20G4.04c.1:exon:3	13	1	0	0	0	0	0	0	0	0	0	0	0	0	0	0	0	0	0	1	0	0	0	0	0	0	0	0	0	0	0	0	0	0	1	0	0	0	0	0	0	0	0	0	0	0	0	0
SPAC1B3.12c.1:exon:3-SPAC1B3.12c.1:exon:1	SPAC1B3.12c.1:exon:2	154	1	0	0	0	0	0	0	0	0	1	0	0	0	0	1	0	0	0	0	0	0	0	0	0	0	0	0	0	0	0	0	0	0	0	0	0	0	0	0	0	0	0	0	0	0	0	0
SPAC890.07c.1:exon:3-SPAC890.07c.1:exon:1	SPAC890.07c.1:exon:2	140	1	0	0	0	0	0	0	0	0	0	0	0	0	0	0	0	0	0	0	0	0	0	0	0	0	0	0	0	0	0	0	0	0	0	0	0	0	0	0	0	0	1	0	0	0	0	0
SPAC29A4.18.1:exon:3-SPAC29A4.18.1:exon:1	SPAC29A4.18.1:exon:2	106	1	0	0	0	0	0	0	0	0	0	0	0	0	0	1	0	0	0	0	0	0	0	0	0	1	3	0	0	0	0	0	0	0	0	0	0	0	0	0	0	0	0	0	0	0	0	0
SPAP8A3.08.1:exon:1-SPAP8A3.08.1:exon:4	SPAP8A3.08.1:exon:2;SPAP8A3.08.1:exon:3	273	2	0	0	0	0	0	0	0	0	0	0	0	0	0	0	0	0	0	0	0	0	0	0	0	0	0	0	0	0	0	0	0	2	0	0	0	0	2	0	0	1	1	0	0	0	0	0
SPAC222.07c.1:exon:4-SPAC222.07c.1:exon:2	SPAC222.07c.1:exon:3	39	1	0	0	0	0	0	0	0	0	0	0	0	0	0	0	0	0	0	0	0	0	0	0	0	0	0	0	0	0	0	0	0	0	0	0	0	0	0	0	0	0	0	0	0	0	0	0
SPAC222.14c.1:exon:4-SPAC222.14c.1:exon:2	SPAC222.14c.1:exon:3	75	1	0	0	0	0	0	0	0	0	0	0	0	0	0	0	0	0	0	0	0	0	0	0	0	0	0	0	0	0	0	0	0	0	0	0	0	0	0	0	0	0	0	0	0	0	0	0
SPAC821.12.1:exon:1-SPAC821.12.1:exon:3	SPAC821.12.1:exon:2	175	1	0	0	0	0	0	0	0	0	0	0	0	0	0	0	0	0	0	0	0	0	0	1	0	0	0	0	0	0	0	0	0	0	0	0	0	0	0	0	0	0	0	0	0	0	0	0
SPAC23C4.13.1:exon:1-SPAC23C4.13.1:exon:3	SPAC23C4.13.1:exon:2	139	1	0	0	0	0	0	0	0	0	0	0	0	0	0	0	0	0	0	0	0	0	0	0	0	0	0	0	0	0	0	0	0	0	0	0	0	0	0	0	0	0	0	0	0	0	0	0
SPAC140.03.1:exon:2-SPAC140.03.1:exon:5	SPAC140.03.1:exon:3;SPAC140.03.1:exon:4	270	2	0	0	0	0	0	0	0	0	0	0	0	0	0	0	0	0	0	0	0	0	0	0	0	0	0	0	0	0	0	0	0	0	0	0	0	0	0	0	0	0	0	0	0	0	0	0
SPAC110.03.1:exon:1-SPAC110.03.1:exon:3	SPAC110.03.1:exon:2	69	1	0	0	0	0	0	0	0	0	0	0	0	0	0	2	0	0	0	0	0	0	0	0	0	0	0	0	0	0	0	0	0	0	0	0	0	0	0	1	0	0	0	0	0	0	0	0
SPAC6C3.09.1:exon:1-SPAC6C3.09.1:exon:3	SPAC6C3.09.1:exon:2	148	1	0	0	0	0	0	0	0	0	0	0	0	0	0	0	0	0	0	0	0	0	0	0	0	0	0	0	0	0	0	0	0	0	0	0	0	0	0	0	0	0	0	0	0	0	0	0
SPAC644.18c.1:exon:4-SPAC644.18c.1:exon:2	SPAC644.18c.1:exon:3	95	1	0	0	0	0	0	0	0	0	0	0	0	0	0	0	0	0	0	0	0	0	0	1	0	0	0	0	0	0	0	0	0	0	0	0	0	0	0	0	1	0	0	0	0	0	0	0
SPAPB2B4.05.1:exon:5-SPAPB2B4.05.1:exon:7	SPAPB2B4.05.1:exon:6	232	1	0	0	0	0	0	0	0	0	0	0	0	0	0	0	0	0	0	0	0	0	0	0	0	0	0	0	0	0	0	0	0	0	0	0	0	0	0	0	0	0	0	0	0	0	0	0
SPAC3F10.09.1:exon:1-SPAC3F10.09.1:exon:3	SPAC3F10.09.1:exon:2	71	1	0	0	0	0	0	0	0	1	0	1	0	0	1	0	0	2	0	0	0	0	0	0	0	0	0	0	0	0	0	0	2	1	0	0	0	0	0	0	0	1	1	0	0	1	0	0
SPAC589.07c.1:exon:4-SPAC589.07c.1:exon:2	SPAC589.07c.1:exon:3	160	1	0	0	0	0	0	0	0	0	0	0	1	0	0	0	0	0	0	0	0	0	0	0	0	0	0	0	0	0	0	0	0	0	0	0	0	0	0	0	0	0	0	0	0	0	0	0
SPAC3G9.09c.1:exon:1-SPAC3G9.09c.1:exon:3	SPAC3G9.09c.1:exon:2	171	1	0	0	0	0	0	0	0	0	0	0	0	0	1	0	0	0	0	0	0	0	0	0	0	0	0	0	0	0	0	0	0	0	0	0	0	0	0	0	2	0	0	0	0	0	0	0
SPAC6G10.04c.1:exon:3-SPAC6G10.04c.1:exon:1	SPAC6G10.04c.1:exon:2	104	1	0	0	0	0	0	0	0	0	0	0	0	0	0	0	0	0	0	0	0	0	0	0	0	0	0	0	0	0	0	0	0	0	0	0	0	0	0	0	0	0	0	0	0	0	0	0
SPAC17G6.15c.1:exon:6-SPAC17G6.15c.1:exon:3	SPAC17G6.15c.1:exon:5;SPAC17G6.15c.1:exon:4	136	2	0	0	0	0	0	0	0	0	0	0	0	0	0	0	0	0	0	0	0	0	0	1	0	0	0	0	0	0	0	0	0	0	0	0	0	0	0	0	0	0	0	0	0	0	0	0
SPAC17G6.15c.1:exon:5-SPAC17G6.15c.1:exon:3	SPAC17G6.15c.1:exon:4	110	1	0	0	0	0	0	0	0	0	0	0	1	0	1	1	0	0	0	0	0	0	0	0	0	0	0	0	0	0	0	0	0	0	0	0	0	0	0	0	0	0	0	0	0	0	0	0
SPAC1556.04c.1:exon:4-SPAC1556.04c.1:exon:2	SPAC1556.04c.1:exon:3	83	1	0	0	0	0	0	0	0	0	0	0	0	0	0	0	0	0	0	0	0	0	0	0	0	0	0	0	0	0	0	0	0	0	0	0	0	0	0	0	0	0	0	0	0	0	0	0
SPAC323.06c.1:exon:4-SPAC323.06c.1:exon:2	SPAC323.06c.1:exon:3	208	1	0	0	0	0	0	0	0	0	0	0	0	0	0	0	0	0	0	0	0	0	0	0	0	0	0	0	0	0	0	0	0	0	0	0	0	0	0	0	0	0	1	0	0	0	0	0
SPAC2F3.16.1:exon:1-SPAC2F3.16.1:exon:3	SPAC2F3.16.1:exon:2	333	1	0	0	0	0	0	0	0	0	0	0	0	0	0	0	0	0	0	0	0	0	0	0	0	0	0	0	0	0	0	0	0	0	0	0	0	0	0	0	0	0	0	0	0	0	0	0
SPAPB18E9.01.1:exon:1-SPAPB18E9.01.1:exon:3	SPAPB18E9.01.1:exon:2	89	1	0	0	0	0	0	0	0	0	0	0	0	0	2	0	0	0	0	0	0	0	0	0	0	0	0	0	0	0	0	0	0	0	0	0	0	0	0	0	2	0	1	0	0	1	0	0
SPAPB18E9.01.1:exon:4-SPAPB18E9.01.1:exon:7	SPAPB18E9.01.1:exon:5;SPAPB18E9.01.1:exon:6	585	2	0	0	0	0	0	0	0	0	0	0	0	0	0	0	0	0	0	0	0	0	0	0	0	0	0	0	0	0	0	0	0	0	0	0	0	0	0	0	0	0	0	0	0	0	0	0
SPAC16.01.1:exon:5-SPAC16.01.1:exon:7	SPAC16.01.1:exon:6	19	1	0	0	0	0	0	0	0	0	1	0	0	0	1	0	0	0	0	0	2	0	0	1	0	0	0	0	0	0	1	0	0	0	0	0	0	0	0	0	0	1	0	0	0	0	0	0
SPAC1851.03.1:exon:1-SPAC1851.03.1:exon:3	SPAC1851.03.1:exon:2	280	1	0	0	0	0	0	0	0	0	0	0	0	0	0	0	0	0	0	0	0	0	0	0	0	0	0	0	0	0	0	0	0	0	0	0	0	0	0	0	0	0	0	0	0	0	0	0
SPAC637.10c.1:exon:4-SPAC637.10c.1:exon:1	SPAC637.10c.1:exon:3;SPAC637.10c.1:exon:2	471	2	0	0	0	0	0	0	0	0	0	0	0	0	0	0	0	0	0	0	0	0	0	0	0	0	0	0	0	0	0	0	0	0	0	0	0	0	0	0	0	0	0	0	0	0	0	0
SPBC119.02.1:exon:1-SPBC119.02.1:exon:3	SPBC119.02.1:exon:2	78	1	0	0	0	0	0	0	0	0	0	0	1	1	0	0	0	0	0	0	0	0	0	0	0	0	0	0	0	0	0	0	0	0	0	0	0	0	0	0	0	1	4	0	0	0	0	0
SPBC651.01c.1:exon:4-SPBC651.01c.1:exon:1	SPBC651.01c.1:exon:3;SPBC651.01c.1:exon:2	191	2	0	0	0	0	0	0	0	0	0	0	0	0	0	0	0	0	0	0	0	0	0	0	0	0	0	0	1	0	0	0	0	0	0	0	0	0	0	1	0	0	0	0	0	0	0	0
SPBC28F2.12.1:exon:4-SPBC28F2.12.1:exon:6	SPBC28F2.12.1:exon:5	60	1	0	0	0	0	0	0	0	0	0	0	0	0	0	0	0	0	0	0	0	0	0	0	0	0	0	0	0	0	0	0	1	0	0	0	0	0	0	0	0	0	0	0	0	0	0	0
SPBC2F12.12c.1:exon:3-SPBC2F12.12c.1:exon:5	SPBC2F12.12c.1:exon:4	453	1	0	0	0	0	0	0	0	1	0	0	0	0	0	0	0	0	0	0	0	0	0	0	0	0	0	0	0	0	0	0	0	0	0	0	0	0	0	0	0	0	0	0	0	0	0	0
SPBC11G11.04.1:exon:1-SPBC11G11.04.1:exon:3	SPBC11G11.04.1:exon:2	83	1	0	0	0	0	0	0	0	0	0	0	0	0	0	0	0	0	0	0	0	0	0	0	0	0	0	0	0	0	0	0	0	0	0	1	0	1	0	0	0	0	0	0	0	0	0	0
SPBC18H10.08c.1:exon:3-SPBC18H10.08c.1:exon:1	SPBC18H10.08c.1:exon:2	144	1	0	0	0	0	0	0	0	0	0	1	0	0	0	0	0	0	0	3	0	0	0	0	0	0	0	0	4	1	0	0	0	0	1	1	0	1	0	0	0	0	1	0	0	0	0	0
SPBP16F5.04.1:exon:1-SPBP16F5.04.1:exon:3	SPBP16F5.04.1:exon:2	58	1	0	0	0	0	0	0	0	0	0	0	0	1	0	0	0	0	0	0	0	0	0	0	0	0	0	0	0	0	0	0	0	0	0	0	0	0	0	0	0	0	0	0	0	1	0	0
SPBC29A3.14c.1:exon:6-SPBC29A3.14c.1:exon:4	SPBC29A3.14c.1:exon:5	214	1	0	0	0	0	0	0	0	0	0	0	0	0	0	0	0	0	0	0	0	0	0	0	0	0	0	0	0	0	0	0	0	0	0	0	0	0	0	0	0	0	0	0	0	0	0	0
SPBC1711.03.1:exon:2-SPBC1711.03.1:exon:4	SPBC1711.03.1:exon:3	275	1	0	0	0	0	0	0	0	0	0	0	0	0	0	0	0	0	0	0	0	0	0	0	0	0	0	0	0	0	0	0	0	0	0	0	0	0	0	0	0	0	0	0	0	0	0	0
SPBC1703.08c.1:exon:5-SPBC1703.08c.1:exon:3	SPBC1703.08c.1:exon:4	129	1	0	0	0	0	0	0	0	0	0	0	0	0	0	0	0	0	0	0	0	0	0	0	0	0	0	0	0	0	0	0	0	0	0	0	0	0	0	0	0	0	0	0	0	0	0	0
SPBC1703.08c.1:exon:5-SPBC1703.08c.1:exon:2	SPBC1703.08c.1:exon:4;SPBC1703.08c.1:exon:3	258	2	0	0	0	0	0	0	0	0	0	1	1	0	0	0	0	0	0	0	0	0	0	0	0	0	0	0	0	0	0	0	0	0	0	0	0	0	0	0	0	0	0	0	0	0	0	1
SPBC1778.10c.1:exon:4-SPBC1778.10c.1:exon:2	SPBC1778.10c.1:exon:3	110	1	0	0	0	0	0	0	0	0	0	0	0	0	0	0	0	0	0	0	0	0	0	0	0	0	0	0	0	0	0	0	0	0	0	0	0	4	0	0	0	0	0	0	0	0	0	0
SPBC776.04.1:exon:2-SPBC776.04.1:exon:4	SPBC776.04.1:exon:3	32	1	0	0	0	0	0	0	0	0	0	0	1	0	2	0	0	0	0	1	0	0	0	0	0	2	1	1	0	0	1	0	0	0	0	0	0	0	0	0	1	1	0	0	0	0	0	0
SPBC4B4.10c.1:exon:4-SPBC4B4.10c.1:exon:2	SPBC4B4.10c.1:exon:3	119	1	0	0	0	0	0	0	0	0	0	0	0	0	0	0	0	0	0	0	0	0	0	0	0	0	0	0	0	0	0	0	0	0	0	0	0	0	0	0	0	0	0	0	0	0	0	0
SPBC31F10.16.1:exon:2-SPBC31F10.16.1:exon:4	SPBC31F10.16.1:exon:3	1620	1	0	0	0	0	0	0	0	0	0	0	0	0	0	0	0	0	0	0	0	0	0	0	0	0	0	0	0	0	0	0	0	0	0	0	0	0	0	0	0	0	0	0	0	0	0	0
SPBC16G5.12c.1:exon:6-SPBC16G5.12c.1:exon:4	SPBC16G5.12c.1:exon:5	377	1	0	0	0	0	0	0	0	0	0	0	0	0	0	0	0	0	0	0	0	0	0	0	0	0	0	0	0	0	0	0	0	0	0	0	0	0	0	0	0	0	1	0	0	0	0	0
SPBC1271.12.1:exon:5-SPBC1271.12.1:exon:2	SPBC1271.12.1:exon:4;SPBC1271.12.1:exon:3	202	2	0	0	0	0	0	0	0	0	0	0	0	0	0	0	0	0	0	0	0	0	0	0	0	0	0	0	0	1	0	0	2	2	0	0	0	0	0	0	0	0	0	0	0	0	0	0
SPBC337.07c.1:exon:5-SPBC337.07c.1:exon:3	SPBC337.07c.1:exon:4	106	1	0	0	0	0	0	0	0	0	0	0	0	0	0	0	0	0	0	0	0	0	0	0	0	0	0	0	0	0	0	0	0	0	0	0	0	0	0	0	0	0	0	0	0	0	0	0
SPBC27B12.08.1:exon:1-SPBC27B12.08.1:exon:3	SPBC27B12.08.1:exon:2	79	1	0	0	0	0	0	0	0	0	0	0	0	0	0	0	0	0	1	0	0	0	0	0	0	0	0	0	0	0	0	0	0	0	0	0	0	0	0	0	0	0	2	0	0	0	0	0
SPAC24H6.01c.1:exon:3-SPAC24H6.01c.1:exon:5	SPAC24H6.01c.1:exon:4	171	1	0	0	0	0	0	0	0	0	0	0	0	0	0	1	1	0	0	0	0	0	0	0	0	0	0	0	0	0	0	0	0	0	0	0	0	0	0	0	0	0	0	0	0	0	0	0
SPAC2F7.17.1:exon:1-SPAC2F7.17.1:exon:3	SPAC2F7.17.1:exon:2	99	1	0	0	0	0	0	0	0	0	0	0	0	0	0	0	0	0	0	0	0	0	0	0	0	0	0	0	0	0	0	0	0	0	0	0	0	0	0	0	0	0	0	0	0	0	0	0
SPAC23C4.17.1:exon:1-SPAC23C4.17.1:exon:3	SPAC23C4.17.1:exon:2	50	1	0	0	0	0	0	0	0	0	1	0	0	0	0	0	0	0	0	0	0	0	0	0	0	0	0	0	1	0	0	0	0	0	0	0	0	0	0	0	0	0	0	0	0	0	0	0
SPAC56F8.05c.1:exon:5-SPAC56F8.05c.1:exon:1	SPAC56F8.05c.1:exon:4;SPAC56F8.05c.1:exon:3;SPAC56F8.05c.1:exon:2	424	3	0	0	0	0	0	0	0	0	0	0	0	0	0	0	0	0	0	0	0	0	0	0	0	0	0	0	0	0	0	0	0	0	0	0	0	0	0	0	0	0	0	0	0	0	0	0
SPAC22A12.08c.1:exon:5-SPAC22A12.08c.1:exon:2	SPAC22A12.08c.1:exon:4;SPAC22A12.08c.1:exon:3	552	2	0	0	0	0	0	0	0	0	1	1	2	0	2	0	1	0	3	0	0	0	0	0	0	0	9	0	0	0	0	0	0	0	0	0	0	0	0	0	0	0	0	0	0	2	1	0
SPAC167.02.1:exon:6-SPAC167.02.1:exon:4	SPAC167.02.1:exon:5	151	1	0	0	0	0	0	0	0	0	0	0	0	0	0	0	0	0	0	0	0	0	0	0	0	0	0	0	0	0	0	0	0	0	0	0	0	0	0	0	1	0	0	0	0	0	0	0
SPAC732.01.1:exon:3-SPAC732.01.1:exon:5	SPAC732.01.1:exon:4	36	1	0	0	0	0	0	0	0	0	1	0	0	0	0	0	0	0	0	0	1	0	0	0	0	0	0	0	0	0	0	0	0	0	0	0	0	0	0	0	0	0	0	0	0	0	0	0
SPAC1B1.04c.1:exon:8-SPAC1B1.04c.1:exon:5	SPAC1B1.04c.1:exon:7;SPAC1B1.04c.1:exon:6	276	2	0	0	0	0	0	0	0	0	0	0	0	0	0	0	0	0	0	0	0	0	0	0	0	0	0	0	0	0	0	0	0	0	0	0	1	0	0	0	0	0	0	0	0	0	0	0
SPAC8C9.15c.1:exon:4-SPAC8C9.15c.1:exon:2	SPAC8C9.15c.1:exon:3	62	1	0	0	0	0	0	0	0	0	0	0	0	0	0	0	0	0	0	0	0	0	0	0	0	0	0	0	0	0	0	0	0	0	0	0	0	0	0	0	0	0	0	0	0	0	0	0
SPAC15E1.09.1:exon:1-SPAC15E1.09.1:exon:3	SPAC15E1.09.1:exon:2	21	1	0	0	0	0	0	0	0	0	1	0	0	0	0	2	0	0	0	1	0	0	0	0	0	0	0	0	0	0	0	0	0	0	2	0	0	0	0	0	0	0	0	0	0	0	0	1
SPAC16.02c.1:exon:10-SPAC16.02c.1:exon:8	SPAC16.02c.1:exon:9	86	1	0	0	0	0	0	0	0	0	0	0	1	0	0	0	0	0	0	0	0	0	0	0	0	0	0	0	0	0	0	0	0	0	0	0	0	0	0	0	0	0	2	0	0	0	0	0
SPAC27D7.07c.1:exon:3-SPAC27D7.07c.1:exon:1	SPAC27D7.07c.1:exon:2	50	1	0	0	0	0	0	0	0	0	0	0	0	0	0	0	0	0	0	1	0	0	0	0	0	0	0	0	0	0	0	0	0	0	0	1	0	0	0	0	0	0	0	0	0	0	0	0
SPAC19B12.10.1:exon:2-SPAC19B12.10.1:three_prime_UTR:2	SPAC19B12.10.1:exon:3;SPAC19B12.10.1:exon:4	1370	2	0	0	0	0	0	0	0	0	0	0	0	0	0	0	0	0	0	0	0	0	0	0	0	0	0	0	0	0	0	0	0	0	0	0	0	0	0	0	0	0	0	0	0	1	0	0
SPAC1952.16.1:five_prime_UTR:1-SPAC1952.16.1:exon:3	SPAC1952.16.1:exon:1;SPAC1952.16.1:exon:2	378	2	0	0	0	0	0	0	0	0	0	0	0	0	0	0	0	0	0	0	0	0	0	0	0	0	0	0	0	0	0	0	0	0	0	0	0	0	0	0	0	0	0	0	0	0	0	0
SPAC3G6.11.1:exon:1-SPAC3G6.11.1:exon:3	SPAC3G6.11.1:exon:2	193	1	0	0	0	0	0	0	0	0	1	0	0	0	0	0	0	0	0	0	0	0	0	0	0	0	0	0	0	0	0	0	0	0	0	0	0	0	0	0	0	0	0	0	0	0	0	0
SPAC13G6.05c.1:exon:4-SPAC13G6.05c.1:exon:2	SPAC13G6.05c.1:exon:3	118	1	0	0	0	0	0	0	0	0	0	0	0	0	0	0	0	1	0	0	0	0	0	0	0	0	0	0	0	0	1	0	0	0	1	1	0	0	0	0	1	1	0	0	0	0	0	0
SPAPJ696.02.1:exon:1-SPAPJ696.02.1:exon:3	SPAPJ696.02.1:exon:2	41	1	0	0	0	0	0	0	0	0	0	0	0	0	0	1	0	0	0	0	0	0	0	0	0	0	0	0	0	0	0	0	0	0	0	0	0	0	0	0	0	1	1	0	0	1	0	0
SPAC22H12.02.1:exon:2-SPAC22H12.02.1:exon:4	SPAC22H12.02.1:exon:3	152	1	0	0	0	0	0	0	0	0	0	0	0	0	0	0	0	0	0	0	0	0	0	0	0	0	1	0	0	0	0	0	0	0	0	0	0	0	0	0	0	0	0	0	0	1	0	0
SPAC1687.17c.1:exon:4-SPAC1687.17c.1:exon:2	SPAC1687.17c.1:exon:3	40	1	0	0	0	0	0	0	0	0	3	0	0	0	0	1	0	0	0	0	0	0	0	0	0	0	0	0	0	0	0	0	0	0	0	0	0	0	0	0	0	0	0	0	0	0	0	0
SPAC821.06.1:exon:1-SPAC821.06.1:exon:3	SPAC821.06.1:exon:2	75	1	0	0	0	0	0	0	0	0	0	0	0	0	0	0	0	0	0	0	0	0	0	0	0	0	0	0	0	0	0	0	0	0	0	0	0	0	0	0	0	0	0	0	0	1	0	0
SPAC4C5.01.1:exon:1-SPAC4C5.01.1:exon:4	SPAC4C5.01.1:exon:2;SPAC4C5.01.1:exon:3	106	2	0	0	0	0	0	0	0	0	1	0	0	0	0	0	0	0	0	0	0	0	0	0	0	0	0	0	0	0	1	0	0	0	0	0	0	0	0	0	0	0	0	0	0	0	0	0
SPAC57A10.03.1:exon:1-SPAC57A10.03.1:exon:3	SPAC57A10.03.1:exon:2	42	1	0	0	0	0	0	0	0	0	0	0	1	0	0	0	0	0	0	0	0	0	0	0	0	0	0	0	0	0	0	0	0	0	0	0	0	0	0	0	0	0	0	0	0	0	0	0
SPAC1705.02.1:exon:1-SPAC1705.02.1:exon:3	SPAC1705.02.1:exon:2	97	1	0	0	0	0	0	0	0	0	0	0	0	0	0	0	0	0	0	2	0	0	0	0	0	0	0	0	0	0	0	0	0	0	0	0	0	0	0	0	0	0	0	0	0	1	0	0
SPAC17A5.02c.1:exon:3-SPAC17A5.02c.1:exon:1	SPAC17A5.02c.1:exon:2	125	1	0	0	0	0	0	0	0	0	0	0	0	0	0	0	0	0	0	0	0	0	0	0	0	0	0	0	0	0	0	0	1	0	0	0	0	0	0	0	0	0	0	0	0	0	0	0
SPAC17A5.16.1:exon:1-SPAC17A5.16.1:exon:3	SPAC17A5.16.1:exon:2	43	1	0	0	0	0	0	0	0	0	1	0	1	0	0	0	0	0	0	0	0	0	0	0	0	0	0	0	0	0	3	0	0	0	0	0	0	0	0	0	1	0	0	0	0	0	0	0
SPAC23C11.01.1:exon:1-SPAC23C11.01.1:exon:3	SPAC23C11.01.1:exon:2	315	1	0	0	0	0	0	0	0	0	0	0	0	0	0	0	0	0	0	0	0	0	0	0	0	0	0	0	0	0	0	0	0	0	0	0	0	1	0	0	0	0	0	0	0	0	0	0
SPAC18G6.03.1:five_prime_UTR:1-SPAC18G6.03.1:exon:2	SPAC18G6.03.1:exon:1	450	1	0	0	0	0	0	0	0	0	0	0	0	0	0	0	0	0	0	0	0	0	0	0	0	0	0	0	0	0	0	0	0	0	0	0	0	1	2	0	0	0	0	0	0	1	0	0
SPAC18G6.03.1:five_prime_UTR:1-SPAC18G6.03.1:exon:3	SPAC18G6.03.1:exon:1;SPAC18G6.03.1:exon:2	531	2	0	0	0	0	0	0	0	0	0	0	0	0	0	0	0	0	0	0	0	0	0	0	0	2	0	0	0	2	0	0	1	0	0	0	0	0	0	0	0	0	0	0	0	0	0	0
SPAC23H3.04.1:exon:1-SPAC23H3.04.1:exon:4	SPAC23H3.04.1:exon:2;SPAC23H3.04.1:exon:3	575	2	0	0	0	0	0	0	0	0	0	0	0	0	0	0	0	0	0	0	0	0	0	0	0	0	0	0	0	0	0	0	0	0	0	0	0	0	0	0	0	0	0	0	0	1	1	0
SPAC6G10.04c.1:exon:4-SPAC6G10.04c.1:exon:2	SPAC6G10.04c.1:exon:3	131	1	0	0	0	0	0	0	0	0	1	0	0	0	0	0	0	0	0	1	0	0	0	0	0	0	0	0	0	0	0	0	0	0	0	0	0	0	0	0	0	0	0	0	0	0	0	0
SPAC6G10.04c.1:exon:4-SPAC6G10.04c.1:exon:1	SPAC6G10.04c.1:exon:3;SPAC6G10.04c.1:exon:2	235	2	0	0	0	0	0	0	0	0	0	0	0	0	0	0	0	0	0	0	0	0	0	0	0	0	0	0	0	0	0	0	0	0	0	0	0	0	0	0	1	0	0	0	0	0	0	0
SPAC16E8.07c.1:exon:3-SPAC16E8.07c.1:exon:1	SPAC16E8.07c.1:exon:2	101	1	0	0	0	0	0	0	0	0	0	0	0	0	0	0	0	0	0	0	0	0	0	0	0	0	0	0	0	0	0	0	0	0	0	0	0	0	0	0	0	0	0	0	0	0	0	0
SPAC1556.08c.1:exon:5-SPAC1556.08c.1:exon:3	SPAC1556.08c.1:exon:4	124	1	0	0	0	0	0	0	0	0	1	0	0	0	1	1	1	0	0	0	0	0	0	0	0	0	0	1	0	2	0	0	3	0	2	0	1	1	1	0	0	0	0	0	0	0	0	0
SPAC1556.08c.1:exon:5-SPAC1556.08c.1:exon:2	SPAC1556.08c.1:exon:4;SPAC1556.08c.1:exon:3	483	2	0	0	0	0	0	0	0	0	1	0	0	0	0	0	0	0	0	0	0	0	0	0	0	0	0	0	0	0	0	0	0	0	0	0	0	0	0	0	0	0	0	0	0	0	0	0
SPAC323.06c.1:exon:7-SPAC323.06c.1:exon:5	SPAC323.06c.1:exon:6	305	1	0	0	0	0	0	0	0	0	0	0	0	0	0	0	0	0	0	0	0	0	0	0	0	0	0	0	0	0	0	0	0	0	0	0	0	0	0	0	0	0	0	0	0	0	0	0
SPAC16.01.1:exon:2-SPAC16.01.1:exon:5	SPAC16.01.1:exon:3;SPAC16.01.1:exon:4	45	2	0	0	0	0	0	0	0	0	4	0	1	0	0	1	0	0	1	0	0	0	0	0	0	0	0	0	0	0	0	0	0	0	1	0	1	0	0	0	0	0	0	0	0	7	0	0
SPAC17C9.05c.1:exon:1-SPAC17C9.05c.1:exon:3	SPAC17C9.05c.1:exon:2	64	1	0	0	0	0	0	0	0	0	0	0	0	0	0	0	0	0	0	0	0	0	0	0	0	0	0	0	0	0	0	0	0	0	0	0	0	0	0	0	0	0	0	0	0	0	0	0
SPAC17C9.05c.1:exon:1-SPAC17C9.05c.1:exon:4	SPAC17C9.05c.1:exon:2;SPAC17C9.05c.1:exon:3	142	2	0	0	0	0	0	0	0	0	0	0	0	0	0	0	0	0	0	0	0	0	0	0	0	0	0	0	0	0	0	0	0	0	0	0	0	0	0	0	0	1	0	0	0	1	0	0
SPAC1834.07.1:exon:2-SPAC1834.07.1:exon:4	SPAC1834.07.1:exon:3	74	1	0	0	0	0	0	0	0	0	0	0	1	0	0	0	0	0	0	0	0	0	0	0	0	0	0	0	0	1	0	0	0	0	0	0	0	0	0	0	0	0	0	0	0	0	0	0
SPAC17D4.01.1:exon:1-SPAC17D4.01.1:exon:3	SPAC17D4.01.1:exon:2	133	1	0	0	0	0	0	0	0	0	0	0	0	0	0	0	0	0	0	0	0	0	0	0	0	0	0	0	0	0	0	0	0	0	0	0	0	0	0	0	1	0	1	0	0	1	0	0
SPAC4F10.20.1:exon:1-SPAC4F10.20.1:exon:4	SPAC4F10.20.1:exon:2;SPAC4F10.20.1:exon:3	151	2	0	0	0	0	0	0	0	0	0	0	0	1	0	0	0	0	0	0	0	0	0	0	0	2	0	0	0	0	0	0	0	0	0	0	0	0	0	0	0	0	0	0	0	0	0	0
SPAC1B3.05.1:exon:1-SPAC1B3.05.1:exon:3	SPAC1B3.05.1:exon:2	38	1	0	0	0	0	0	0	0	0	0	0	0	0	1	1	0	0	0	2	0	0	0	0	0	2	0	0	0	0	2	0	0	0	0	0	0	2	0	1	0	0	0	0	0	1	0	0
SPAC1B3.14.1:exon:1-SPAC1B3.14.1:exon:4	SPAC1B3.14.1:exon:2;SPAC1B3.14.1:exon:3	138	2	0	0	0	0	0	0	0	0	0	0	0	0	0	0	0	0	0	0	0	0	0	0	0	0	0	0	0	0	0	0	0	0	0	0	0	0	0	0	0	0	0	0	0	0	0	0
SPAC29A4.08c.1:exon:1-SPAC29A4.08c.1:exon:3	SPAC29A4.08c.1:exon:2	105	1	0	0	0	0	0	0	0	0	0	0	0	0	0	0	0	0	0	0	0	0	0	0	0	0	0	0	0	1	0	0	0	0	0	0	0	0	0	0	0	0	0	0	0	0	0	0
SPAC11E3.03.1:exon:1-SPAC11E3.03.1:exon:3	SPAC11E3.03.1:exon:2	342	1	0	0	0	0	0	0	0	0	1	0	0	0	0	0	0	0	0	0	0	0	0	0	0	0	0	0	0	0	0	0	0	0	0	0	0	0	0	0	0	0	0	0	0	0	0	0
SPBC660.16.1:exon:1-SPBC660.16.1:exon:3	SPBC660.16.1:exon:2	5	1	0	0	0	0	0	0	0	0	1	0	0	0	0	0	0	0	1	0	0	0	0	0	0	0	0	0	0	0	0	0	0	0	0	0	0	0	0	1	0	0	0	0	0	0	0	0
SPBC660.16.1:exon:1-SPBC660.16.1:exon:4	SPBC660.16.1:exon:2;SPBC660.16.1:exon:3	69	2	0	0	0	0	0	0	0	0	0	0	0	0	0	0	0	0	0	0	0	0	0	0	0	0	0	0	0	0	0	0	0	0	0	0	0	0	0	0	0	0	0	0	0	0	0	0
SPBC660.16.1:exon:3-SPBC660.16.1:exon:5	SPBC660.16.1:exon:4	68	1	0	0	0	0	0	0	0	0	0	0	0	0	0	0	0	0	0	0	0	0	0	0	0	0	0	0	0	0	0	0	0	0	0	0	0	0	0	0	0	0	0	0	0	0	0	0
SPBC1271.11.1:exon:5-SPBC1271.11.1:exon:2	SPBC1271.11.1:exon:4;SPBC1271.11.1:exon:3	36	2	0	0	0	0	0	0	0	0	0	0	0	0	0	0	0	0	0	0	0	0	0	0	0	0	0	0	0	0	0	0	0	0	0	0	1	0	0	0	0	0	0	0	0	1	0	0
SPBC1685.16.1:exon:1-SPBC1685.16.1:exon:3	SPBC1685.16.1:exon:2	51	1	0	0	0	0	0	0	0	0	1	0	0	0	0	1	0	0	0	0	4	0	0	0	0	2	0	0	0	1	0	0	0	1	0	0	0	0	0	0	0	0	0	0	0	0	0	0
SPBC119.08.1:exon:1-SPBC119.08.1:exon:3	SPBC119.08.1:exon:2	180	1	0	0	0	0	0	0	0	0	0	0	0	0	0	1	0	0	0	0	0	0	0	0	0	0	3	0	0	1	0	1	0	0	0	0	0	4	0	0	0	0	0	0	0	0	0	0
SPBC651.01c.1:exon:4-SPBC651.01c.1:exon:2	SPBC651.01c.1:exon:3	96	1	0	0	0	0	0	0	0	0	1	0	0	0	0	0	0	0	0	0	0	0	0	0	0	0	0	0	0	0	0	0	0	0	0	0	0	0	0	0	0	0	0	0	0	0	0	0
SPBC28F2.12.1:exon:1-SPBC28F2.12.1:exon:3	SPBC28F2.12.1:exon:2	26	1	0	0	0	0	0	0	0	0	0	0	0	1	0	1	0	0	0	0	0	0	0	0	0	0	0	0	0	0	0	0	0	0	0	0	0	0	0	0	0	1	0	0	0	1	1	2
SPBC18H10.04c.1:exon:4-SPBC18H10.04c.1:exon:1	SPBC18H10.04c.1:exon:3;SPBC18H10.04c.1:exon:2	102	2	0	0	0	0	0	0	0	0	0	0	0	0	0	0	0	0	0	0	0	0	0	0	0	0	0	0	0	0	0	0	0	0	0	0	0	0	0	0	0	0	0	0	0	0	0	0
SPBC14C8.04.1:exon:1-SPBC14C8.04.1:exon:3	SPBC14C8.04.1:exon:2	138	1	0	0	0	0	0	0	0	0	1	0	0	0	0	0	0	0	0	0	0	0	0	0	0	0	0	0	0	0	0	0	0	0	0	0	0	1	0	0	0	0	0	0	0	0	0	0
SPBC14C8.04.1:exon:2-SPBC14C8.04.1:exon:4	SPBC14C8.04.1:exon:3	194	1	0	0	0	0	0	0	0	0	0	0	0	0	0	0	0	2	1	0	0	0	0	0	0	0	0	0	0	0	0	0	0	0	0	0	0	1	0	1	0	1	2	0	0	1	0	1
SPBC24C6.10c.1:exon:3-SPBC24C6.10c.1:exon:1	SPBC24C6.10c.1:exon:2	90	1	0	0	0	0	0	0	0	0	0	0	0	0	0	0	0	0	0	0	0	0	0	0	0	0	0	0	0	0	0	0	0	0	0	0	0	0	0	0	0	0	0	0	0	0	0	0
SPBC19G7.18c.1:exon:3-SPBC19G7.18c.1:exon:1	SPBC19G7.18c.1:exon:2	71	1	0	0	0	0	0	0	0	0	1	0	0	0	0	0	0	0	0	0	0	0	0	0	0	0	0	0	0	1	0	0	0	0	0	0	0	0	0	0	0	0	0	0	0	0	0	0
SPBC6B1.10.1:exon:1-SPBC6B1.10.1:exon:4	SPBC6B1.10.1:exon:2;SPBC6B1.10.1:exon:3	1381	2	0	0	0	0	0	0	0	0	1	0	0	0	0	0	0	0	1	0	0	0	0	0	0	0	0	0	0	0	0	0	0	0	0	0	0	0	0	0	0	0	0	0	0	0	0	0
SPBC4F6.07c.1:exon:4-SPBC4F6.07c.1:exon:2	SPBC4F6.07c.1:exon:3	856	1	0	0	0	0	0	0	0	0	1	0	0	0	0	0	0	0	0	0	0	0	0	0	0	0	0	0	0	0	0	0	0	0	0	0	0	0	0	0	0	0	0	0	0	0	0	0
SPBC1778.08c.1:exon:3-SPBC1778.08c.1:exon:1	SPBC1778.08c.1:exon:2	276	1	0	0	0	0	0	0	0	0	2	0	0	0	0	0	0	0	0	1	0	0	0	0	0	0	0	0	0	0	0	0	0	0	0	0	0	0	0	0	0	0	0	0	0	0	0	0
SPBC1778.10c.1:exon:5-SPBC1778.10c.1:exon:3	SPBC1778.10c.1:exon:4	237	1	0	0	0	0	0	0	0	0	1	0	0	0	0	0	0	0	0	0	0	0	0	0	0	0	0	0	1	0	0	0	0	0	0	0	0	0	0	0	0	0	0	0	0	0	0	0
SPBC25H2.14.1:exon:3-SPBC25H2.14.1:exon:1	SPBC25H2.14.1:exon:2	80	1	0	0	0	0	0	0	0	0	0	0	0	0	0	0	0	0	0	0	0	0	0	0	0	0	0	0	0	0	0	0	0	0	0	0	0	0	0	0	0	0	0	0	0	0	0	0
SPBC11C11.11c.1:exon:3-SPBC11C11.11c.1:exon:1	SPBC11C11.11c.1:exon:2	152	1	0	0	0	0	0	0	0	0	0	0	0	0	0	0	0	0	0	0	0	0	0	0	0	0	0	0	0	0	0	0	0	0	0	0	0	0	0	0	0	0	0	0	0	0	0	0
SPBC1347.07.1:exon:1-SPBC1347.07.1:exon:3	SPBC1347.07.1:exon:2	81	1	0	0	0	0	0	0	0	0	1	0	0	0	0	0	0	0	0	0	0	0	0	0	0	0	0	0	0	0	0	0	0	0	0	0	0	0	0	0	0	0	0	0	0	0	0	0
SPBC1271.12.1:exon:7-SPBC1271.12.1:exon:1	SPBC1271.12.1:exon:6;SPBC1271.12.1:exon:5;SPBC1271.12.1:exon:4;SPBC1271.12.1:exon:3;SPBC1271.12.1:exon:2	554	5	0	0	0	0	0	0	0	0	1	0	0	0	0	0	0	0	0	0	0	0	0	0	0	0	0	1	0	0	0	0	0	0	0	0	0	0	0	0	0	0	0	0	0	1	0	0
SPBC902.05c.1:exon:5-SPBC902.05c.1:exon:1	SPBC902.05c.1:exon:4;SPBC902.05c.1:exon:3;SPBC902.05c.1:exon:2	961	3	0	0	0	0	0	0	0	0	1	0	0	0	0	0	0	0	0	0	0	0	0	0	0	0	3	0	1	0	1	3	0	2	0	0	0	0	0	0	0	0	0	0	0	2	0	0
SPBC354.07c.1:exon:5-SPBC354.07c.1:exon:3	SPBC354.07c.1:exon:4	13	1	0	0	0	0	0	0	0	0	0	0	0	0	0	0	0	0	0	0	0	0	0	0	0	0	0	0	0	0	0	0	0	0	0	1	0	4	0	0	0	0	0	0	0	0	0	0
SPBC577.09.1:exon:1-SPBC577.09.1:exon:5	SPBC577.09.1:exon:2;SPBC577.09.1:exon:3;SPBC577.09.1:exon:4	374	3	0	0	0	0	0	0	0	0	0	0	0	0	1	0	0	0	0	0	0	0	0	0	0	0	0	0	0	0	0	0	0	0	0	0	0	0	0	0	0	0	0	0	0	1	0	0
SPBC27B12.08.1:exon:7-SPBC27B12.08.1:exon:9	SPBC27B12.08.1:exon:8	202	1	0	0	0	0	0	0	0	0	0	0	0	0	0	0	0	0	0	0	0	0	0	0	0	0	0	0	0	0	0	0	0	0	0	0	0	0	0	0	0	0	0	0	0	0	0	0
SPBP22H7.09c.1:exon:3-SPBP22H7.09c.1:exon:1	SPBP22H7.09c.1:exon:2	134	1	0	0	0	0	0	0	0	0	0	0	0	0	0	1	0	0	0	0	0	0	0	0	0	0	2	0	0	0	0	0	1	0	1	2	0	1	0	0	0	0	0	0	0	0	0	0
SPBC3H7.01.1:five_prime_UTR:2-SPBC3H7.01.1:exon:4	SPBC3H7.01.1:exon:5	211	1	0	0	0	0	0	0	0	0	1	0	0	0	0	0	0	0	0	0	0	0	0	0	0	0	0	0	0	0	0	0	0	0	0	1	0	0	0	0	0	0	0	0	0	0	0	0
SPBC16H5.04.1:exon:3-SPBC16H5.04.1:exon:1	SPBC16H5.04.1:exon:2	163	1	0	0	0	0	0	0	0	0	0	0	0	0	0	0	0	0	0	0	0	0	0	0	0	0	0	0	0	0	0	0	0	0	0	0	0	0	0	1	0	1	1	0	0	0	0	0
SPBC12C2.05c.1:exon:1-SPBC12C2.05c.1:exon:3	SPBC12C2.05c.1:exon:2	27	1	0	0	0	0	0	0	0	0	1	0	0	0	0	0	0	0	0	0	0	0	0	0	0	0	0	0	0	0	0	0	0	0	0	0	0	0	0	0	0	0	0	0	0	0	0	0
SPBC557.04.1:five_prime_UTR:1-SPBC557.04.1:exon:2	SPBC557.04.1:exon:1	187	1	0	0	0	0	0	0	0	0	0	0	0	0	0	0	0	0	0	0	0	0	0	0	0	0	0	0	0	0	0	0	0	0	0	0	0	0	0	0	0	0	0	0	0	0	0	0
SPBC2G5.07c.1:exon:4-SPBC2G5.07c.1:exon:2	SPBC2G5.07c.1:exon:3	87	1	0	0	0	0	0	0	0	0	1	0	0	0	0	0	0	0	0	1	0	0	0	0	0	0	0	0	0	0	0	0	0	0	0	0	0	0	0	0	0	0	0	0	0	0	0	0
SPBC336.14c.1:exon:9-SPBC336.14c.1:exon:7	SPBC336.14c.1:exon:8	96	1	0	0	0	0	0	0	0	0	1	0	0	0	1	0	0	0	0	0	0	0	0	0	0	0	0	0	0	0	0	0	0	0	0	0	0	0	0	0	0	0	0	0	0	1	0	0
SPBC776.14.1:exon:3-SPBC776.14.1:exon:5	SPBC776.14.1:exon:4	28	1	0	0	0	0	0	0	0	0	0	0	0	0	0	0	0	0	0	0	0	0	0	0	0	0	0	0	0	0	0	0	0	0	0	0	0	0	0	0	0	0	0	0	0	0	0	0
SPBC11C11.01.1:exon:1-SPBC11C11.01.1:exon:7	SPBC11C11.01.1:exon:2;SPBC11C11.01.1:exon:3;SPBC11C11.01.1:exon:4;SPBC11C11.01.1:exon:5;SPBC11C11.01.1:exon:6	856	5	0	0	0	0	0	0	0	0	0	0	0	0	0	0	0	0	0	0	0	0	0	0	0	0	0	0	0	0	0	0	0	0	0	0	0	0	0	0	0	0	0	0	0	0	0	0
SPBP8B7.22.1:exon:1-SPBP8B7.22.1:exon:3	SPBP8B7.22.1:exon:2	126	1	0	0	0	0	0	0	0	0	1	0	0	0	0	0	0	0	0	0	0	0	0	0	0	0	0	0	0	0	0	0	0	0	0	0	0	0	0	0	0	0	0	0	0	0	0	0
SPBC13G1.12.1:exon:2-SPBC13G1.12.1:exon:4	SPBC13G1.12.1:exon:3	78	1	0	0	0	0	0	0	0	0	1	0	0	0	0	1	0	0	0	0	0	0	0	0	0	0	0	0	0	0	0	0	0	0	0	0	0	0	0	0	0	0	0	0	0	0	0	0
SPBC1347.12.1:exon:1-SPBC1347.12.1:exon:3	SPBC1347.12.1:exon:2	31	1	0	0	0	0	0	0	0	0	0	0	0	0	0	0	0	0	0	0	0	0	0	0	0	0	0	0	0	0	0	0	0	0	0	0	0	0	0	0	0	0	0	0	0	0	0	0
SPCC1235.11.1:exon:1-SPCC1235.11.1:exon:5	SPCC1235.11.1:exon:2;SPCC1235.11.1:exon:3;SPCC1235.11.1:exon:4	241	3	0	0	0	0	0	0	0	0	1	0	0	0	0	0	0	0	0	0	0	0	0	0	0	0	0	0	0	0	0	0	0	0	0	0	0	0	0	0	0	0	0	0	0	0	0	0
SPCC548.04.1:exon:1-SPCC548.04.1:exon:3	SPCC548.04.1:exon:2	153	1	0	0	0	0	0	0	0	0	0	1	0	0	1	0	0	0	0	0	2	0	0	0	0	0	0	1	1	1	0	0	0	2	1	0	0	0	0	0	0	0	0	0	0	0	0	0
SPCC970.12.1:exon:6-SPCC970.12.1:exon:4	SPCC970.12.1:exon:5	61	1	0	0	0	0	0	0	0	0	0	0	0	0	0	0	0	0	0	1	0	0	0	0	0	0	0	0	0	0	0	0	0	0	0	0	0	0	0	0	0	0	0	0	0	0	0	0
SPCC830.10.1:exon:1-SPCC830.10.1:exon:7	SPCC830.10.1:exon:2;SPCC830.10.1:exon:3;SPCC830.10.1:exon:4;SPCC830.10.1:exon:5;SPCC830.10.1:exon:6	443	5	0	0	0	0	0	0	0	0	1	0	0	0	0	0	0	0	0	0	0	0	0	0	0	0	0	0	0	0	0	0	0	0	0	0	0	0	0	1	0	1	0	0	0	1	1	0
SPCC1827.07c.1:exon:6-SPCC1827.07c.1:exon:3	SPCC1827.07c.1:exon:5;SPCC1827.07c.1:exon:4	355	2	0	0	0	0	0	0	0	0	0	1	0	0	2	2	0	0	0	0	0	0	0	0	0	0	0	0	0	0	0	0	0	0	0	0	0	0	0	0	0	0	0	0	0	0	0	0
SPCC1235.15.1:exon:1-SPCC1235.15.1:exon:3	SPCC1235.15.1:exon:2	229	1	0	0	0	0	0	0	0	0	0	0	0	0	0	0	0	0	0	0	0	0	0	0	0	0	0	0	0	0	0	0	0	0	0	0	0	0	0	0	0	0	0	0	0	0	0	0
SPCC1682.01.1:exon:2-SPCC1682.01.1:exon:4	SPCC1682.01.1:exon:3	49	1	0	0	0	0	0	0	0	0	0	0	0	0	1	0	0	0	0	0	0	0	0	0	0	0	0	0	0	1	0	0	0	0	0	0	1	0	0	0	0	0	0	0	0	1	0	0
SPCC1393.09c.1:exon:4-SPCC1393.09c.1:exon:2	SPCC1393.09c.1:exon:3	69	1	0	0	0	0	0	0	0	0	0	0	0	0	0	0	0	0	0	0	0	0	0	0	0	0	0	0	0	0	0	0	0	0	0	0	0	0	0	0	0	0	0	0	0	0	0	0
SPCC16A11.05c.1:exon:5-SPCC16A11.05c.1:exon:1	SPCC16A11.05c.1:exon:4;SPCC16A11.05c.1:exon:3;SPCC16A11.05c.1:exon:2	178	3	0	0	0	0	0	0	0	0	0	0	0	0	0	0	0	0	0	0	0	0	0	0	0	0	0	0	0	0	0	0	0	0	0	0	0	0	0	0	0	0	0	0	0	0	0	0
SPCC23B6.01c.1:exon:3-SPCC23B6.01c.1:exon:1	SPCC23B6.01c.1:exon:2	78	1	0	0	0	0	0	0	0	0	0	1	0	0	0	1	0	0	0	0	0	0	0	0	0	0	1	0	1	0	2	0	1	0	0	0	0	0	0	0	0	1	0	0	0	0	0	0
SPCC1281.08.1:exon:1-SPCC1281.08.1:exon:4	SPCC1281.08.1:exon:2;SPCC1281.08.1:exon:3	552	2	0	0	0	0	0	0	0	0	0	0	0	0	0	0	0	0	0	0	0	0	0	0	0	0	0	0	0	0	0	0	0	0	0	0	0	0	0	0	0	0	0	0	0	1	1	0
SPCC188.02.1:exon:2-SPCC188.02.1:exon:4	SPCC188.02.1:exon:3	214	1	0	0	0	0	0	0	0	0	0	0	0	0	0	0	0	0	0	0	0	0	0	0	0	0	0	0	0	0	0	0	0	0	0	0	0	0	0	0	0	0	0	0	0	0	0	0
SPCC188.03.1:exon:1-SPCC188.03.1:exon:5	SPCC188.03.1:exon:2;SPCC188.03.1:exon:3;SPCC188.03.1:exon:4	471	3	0	0	0	0	0	0	0	0	0	0	0	0	0	0	0	0	0	0	0	0	0	0	0	0	0	0	0	0	0	0	0	0	0	0	0	0	0	0	0	0	0	0	0	0	0	0
SPCC18.15.1:exon:1-SPCC18.15.1:exon:3	SPCC18.15.1:exon:2	48	1	0	0	0	0	0	0	0	0	0	0	0	0	0	0	0	0	0	0	0	0	0	0	0	0	0	0	0	0	0	0	0	0	0	0	0	0	0	0	0	0	0	0	0	0	0	0
SPCC1620.07c.1:exon:3-SPCC1620.07c.1:exon:1	SPCC1620.07c.1:exon:2	242	1	0	0	0	0	0	0	0	0	0	0	0	0	0	0	0	0	0	0	0	0	0	0	0	0	0	0	0	0	0	0	0	0	0	0	0	0	0	0	0	0	0	0	0	0	0	0
SPAC806.04c.1:exon:4-SPAC806.04c.1:exon:2	SPAC806.04c.1:exon:3	1059	1	0	0	0	0	0	0	0	0	0	0	0	0	0	0	0	0	0	0	0	0	0	0	0	0	0	0	0	0	0	0	0	0	0	0	0	0	0	0	1	0	0	0	0	0	0	1
SPAC806.04c.1:exon:3-SPAC806.04c.1:exon:1	SPAC806.04c.1:exon:2	121	1	0	0	0	0	0	0	0	0	0	0	0	0	0	0	0	0	0	0	0	0	0	0	0	0	0	0	0	0	0	0	0	0	0	0	0	0	0	0	0	0	0	0	0	0	0	0
SPAC630.03.1:exon:2-SPAC630.03.1:exon:4	SPAC630.03.1:exon:3	529	1	0	0	0	0	0	0	0	0	0	0	0	0	0	0	0	0	0	0	0	0	0	0	0	0	0	0	0	0	0	0	0	0	0	0	0	0	0	0	0	0	0	0	0	0	0	0
SPAC630.14c.1:exon:4-SPAC630.14c.1:exon:2	SPAC630.14c.1:exon:3	88	1	0	0	0	0	0	0	0	0	0	0	0	0	0	0	0	0	0	0	0	0	0	0	0	0	0	0	0	0	0	0	0	0	0	2	0	0	0	0	0	0	0	0	0	0	0	0
SPAC630.14c.1:exon:3-SPAC630.14c.1:exon:1	SPAC630.14c.1:exon:2	353	1	0	0	0	0	0	0	0	0	0	0	0	0	0	0	0	0	1	0	0	0	0	0	0	0	0	0	0	0	0	0	0	0	0	0	0	0	0	0	0	0	0	0	0	0	1	0
SPAC31A2.05c.1:exon:7-SPAC31A2.05c.1:exon:1	SPAC31A2.05c.1:exon:6;SPAC31A2.05c.1:exon:5;SPAC31A2.05c.1:exon:4;SPAC31A2.05c.1:exon:3;SPAC31A2.05c.1:exon:2	4381	5	0	0	0	0	0	0	0	0	0	0	0	0	0	0	0	0	0	0	0	0	0	0	0	0	0	0	0	0	0	0	0	0	0	0	0	0	0	0	0	0	0	0	0	0	0	0
SPAC31A2.10.1:exon:2-SPAC31A2.10.1:exon:5	SPAC31A2.10.1:exon:3;SPAC31A2.10.1:exon:4	228	2	0	0	0	0	0	0	0	0	0	0	0	0	0	0	0	0	0	0	0	0	0	0	0	0	0	0	0	0	0	0	0	0	0	0	0	0	0	0	0	0	0	0	0	0	0	0
SPAC24H6.01c.1:exon:3-SPAC24H6.01c.1:exon:6	SPAC24H6.01c.1:exon:4;SPAC24H6.01c.1:exon:5	844	2	0	0	0	0	0	0	0	0	0	0	0	0	0	0	0	0	0	0	0	0	0	0	0	0	0	0	0	0	0	0	0	0	0	0	0	0	0	0	0	0	0	0	0	0	0	0
SPAC227.10.1:exon:1-SPAC227.10.1:exon:4	SPAC227.10.1:exon:2;SPAC227.10.1:exon:3	215	2	0	0	0	0	0	0	0	0	0	0	0	0	0	0	0	0	0	0	1	0	0	0	0	0	0	0	0	0	0	0	0	0	0	0	0	0	0	0	0	0	0	0	0	0	0	0
SPAC13A11.04c.1:exon:6-SPAC13A11.04c.1:exon:4	SPAC13A11.04c.1:exon:5	133	1	0	0	0	0	0	0	0	0	0	0	0	0	0	0	0	0	0	0	0	0	0	0	0	0	0	0	0	0	0	0	0	0	0	0	0	0	0	0	0	0	0	0	0	0	0	0
SPAC13A11.04c.1:exon:5-SPAC13A11.04c.1:exon:1	SPAC13A11.04c.1:exon:4;SPAC13A11.04c.1:exon:3;SPAC13A11.04c.1:exon:2	1051	3	0	0	0	0	0	0	0	0	0	0	0	0	0	0	0	0	0	0	0	0	0	0	0	0	0	0	0	0	0	0	0	0	0	0	0	0	0	0	0	0	0	0	0	0	0	0
SPAC3H8.10.1:exon:1-SPAC3H8.10.1:exon:3	SPAC3H8.10.1:exon:2	303	1	0	0	0	0	0	0	0	0	0	0	0	0	0	0	0	0	0	0	0	0	0	0	0	0	0	0	0	0	0	0	0	0	0	0	0	0	0	0	0	0	0	0	0	0	0	0
SPAC1D4.09c.1:exon:3-SPAC1D4.09c.1:exon:1	SPAC1D4.09c.1:exon:2	123	1	0	0	0	0	0	0	0	0	0	0	0	0	0	0	0	0	0	0	0	0	0	0	0	0	0	0	0	0	0	0	0	0	0	0	0	0	0	0	0	0	0	0	0	0	0	0
SPAC22F3.05c.1:exon:2-SPAC22F3.05c.1:exon:6	SPAC22F3.05c.1:exon:3;SPAC22F3.05c.1:exon:4;SPAC22F3.05c.1:exon:5	300	3	0	0	0	0	0	0	0	0	0	0	0	0	0	0	0	0	0	0	0	0	0	0	0	0	0	0	0	0	0	0	0	0	0	0	0	0	0	0	0	0	0	0	0	0	1	0
SPAC22F3.03c.1:exon:2-SPAC22F3.03c.1:exon:4	SPAC22F3.03c.1:exon:3	76	1	0	0	0	0	0	0	0	0	0	0	0	0	0	0	0	0	0	0	0	0	0	0	0	0	0	0	0	0	0	0	0	0	0	0	0	0	0	0	0	0	0	0	0	0	0	0
SPAC22F3.03c.1:exon:2-SPAC22F3.03c.1:exon:6	SPAC22F3.03c.1:exon:3;SPAC22F3.03c.1:exon:4;SPAC22F3.03c.1:exon:5	482	3	0	0	0	0	0	0	0	0	0	0	0	0	0	0	0	0	0	0	0	0	0	0	0	0	0	0	0	0	0	0	0	0	0	0	0	0	0	0	0	0	0	0	0	0	0	0
SPAC22F3.03c.1:exon:2-SPAC22F3.03c.1:exon:8	SPAC22F3.03c.1:exon:3;SPAC22F3.03c.1:exon:4;SPAC22F3.03c.1:exon:5;SPAC22F3.03c.1:exon:6;SPAC22F3.03c.1:exon:7	688	5	0	0	0	0	0	0	0	0	0	0	0	0	0	0	0	0	0	0	0	0	0	0	0	0	0	0	0	0	0	0	0	0	0	0	0	0	0	0	0	0	0	0	0	0	0	0
SPAC22F3.03c.1:exon:3-SPAC22F3.03c.1:exon:8	SPAC22F3.03c.1:exon:4;SPAC22F3.03c.1:exon:5;SPAC22F3.03c.1:exon:6;SPAC22F3.03c.1:exon:7	612	4	0	0	0	0	0	0	0	0	0	0	0	0	0	0	0	0	0	0	0	0	0	0	0	0	0	0	0	0	0	0	0	0	0	0	0	0	0	0	0	0	0	0	0	0	0	0
SPAC22F3.03c.1:exon:4-SPAC22F3.03c.1:exon:13	SPAC22F3.03c.1:exon:5;SPAC22F3.03c.1:exon:6;SPAC22F3.03c.1:exon:7;SPAC22F3.03c.1:exon:8;SPAC22F3.03c.1:exon:9;SPAC22F3.03c.1:exon:10;SPAC22F3.03c.1:exon:11;SPAC22F3.03c.1:exon:12	1407	8	0	0	0	0	0	0	0	0	0	0	0	0	0	0	0	0	0	0	0	0	0	0	0	0	0	0	0	0	0	0	0	0	0	0	0	0	0	0	0	0	0	0	0	0	0	0
SPAC22F3.03c.1:exon:5-SPAC22F3.03c.1:exon:15	SPAC22F3.03c.1:exon:6;SPAC22F3.03c.1:exon:7;SPAC22F3.03c.1:exon:8;SPAC22F3.03c.1:exon:9;SPAC22F3.03c.1:exon:10;SPAC22F3.03c.1:exon:11;SPAC22F3.03c.1:exon:12;SPAC22F3.03c.1:exon:13;SPAC22F3.03c.1:exon:14	1535	9	0	0	0	0	0	0	0	0	0	0	0	0	0	0	0	0	0	0	0	0	0	0	0	0	0	0	0	0	0	0	0	0	0	0	0	0	0	0	0	0	0	0	0	0	0	0
SPAC22F3.03c.1:exon:6-SPAC22F3.03c.1:exon:8	SPAC22F3.03c.1:exon:7	132	1	0	0	0	0	0	0	0	0	0	0	0	0	0	0	0	0	0	0	0	0	0	0	0	0	0	0	0	0	0	0	0	0	0	0	0	0	0	0	0	0	0	0	0	0	0	0
SPAC22F3.03c.1:exon:6-SPAC22F3.03c.1:exon:15	SPAC22F3.03c.1:exon:7;SPAC22F3.03c.1:exon:8;SPAC22F3.03c.1:exon:9;SPAC22F3.03c.1:exon:10;SPAC22F3.03c.1:exon:11;SPAC22F3.03c.1:exon:12;SPAC22F3.03c.1:exon:13;SPAC22F3.03c.1:exon:14	1461	8	0	0	0	0	0	0	0	0	0	0	0	0	0	0	0	0	0	0	0	0	0	0	0	0	0	0	0	0	0	0	0	0	0	0	0	0	0	0	0	0	0	0	0	0	0	0
SPAC22F3.03c.1:exon:8-SPAC22F3.03c.1:exon:10	SPAC22F3.03c.1:exon:9	99	1	0	0	0	0	0	0	0	0	0	0	0	0	0	0	0	0	0	0	0	0	0	0	0	0	0	0	0	0	0	0	0	0	0	0	0	0	0	0	0	0	0	0	0	0	0	0
SPAC22F3.03c.1:exon:8-SPAC22F3.03c.1:exon:13	SPAC22F3.03c.1:exon:9;SPAC22F3.03c.1:exon:10;SPAC22F3.03c.1:exon:11;SPAC22F3.03c.1:exon:12	946	4	0	0	0	0	0	0	0	0	0	0	0	0	0	0	0	0	0	0	0	0	0	0	0	0	0	0	0	0	0	0	0	0	0	0	0	0	0	1	0	0	0	0	0	0	0	0
SPAC22F3.03c.1:exon:10-SPAC22F3.03c.1:exon:12	SPAC22F3.03c.1:exon:11	73	1	0	0	0	0	0	0	0	0	0	0	0	0	0	0	1	0	0	0	0	0	0	0	0	0	0	0	0	0	0	0	0	0	0	0	0	0	0	0	0	0	1	0	0	0	0	0
SPAC22F3.03c.1:exon:12-SPAC22F3.03c.1:exon:15	SPAC22F3.03c.1:exon:13;SPAC22F3.03c.1:exon:14	319	2	0	0	0	0	0	0	0	0	0	0	2	0	0	0	0	0	0	0	0	0	0	0	0	0	0	0	0	0	0	0	0	0	0	0	0	0	0	0	0	0	1	0	0	0	0	0
SPAC1296.01c.1:exon:6-SPAC1296.01c.1:exon:4	SPAC1296.01c.1:exon:5	86	1	0	0	0	0	0	0	0	0	0	2	0	0	0	0	0	0	0	0	0	0	0	0	0	0	0	1	0	0	0	0	0	0	0	0	0	0	0	0	0	0	0	0	0	0	0	0
SPAC1296.01c.1:exon:5-SPAC1296.01c.1:exon:3	SPAC1296.01c.1:exon:4	217	1	0	0	0	0	0	0	0	0	0	0	0	0	0	0	0	0	0	0	0	0	0	0	0	0	0	0	0	0	0	0	0	0	0	0	0	0	0	0	0	0	0	0	0	0	0	0
SPAC1296.01c.1:exon:3-SPAC1296.01c.1:exon:1	SPAC1296.01c.1:exon:2	764	1	0	0	0	0	0	0	0	0	0	0	0	0	0	0	0	0	0	0	0	0	0	0	0	0	0	0	0	0	0	0	0	0	0	0	0	0	0	0	0	0	0	0	0	0	0	0
SPAC22G7.02.1:exon:1-SPAC22G7.02.1:exon:3	SPAC22G7.02.1:exon:2	126	1	0	0	0	0	0	0	0	0	0	0	0	0	0	0	0	0	0	0	0	0	0	0	0	0	0	0	0	0	0	0	0	0	0	0	0	0	0	0	0	0	0	0	0	0	0	0
SPAC22G7.02.1:exon:5-SPAC22G7.02.1:exon:8	SPAC22G7.02.1:exon:6;SPAC22G7.02.1:exon:7	278	2	0	0	0	0	0	0	0	0	0	0	0	0	0	0	0	0	0	0	0	0	0	0	0	0	0	0	0	0	0	0	0	0	0	0	0	0	0	0	1	1	0	0	0	0	0	0
SPAC22G7.02.1:exon:6-SPAC22G7.02.1:exon:8	SPAC22G7.02.1:exon:7	182	1	0	0	0	0	0	0	0	0	0	0	0	0	0	0	0	0	0	0	0	0	0	0	0	0	0	0	0	0	0	0	0	0	0	0	0	0	0	0	0	0	0	0	0	0	0	0
SPAC22G7.04.1:exon:1-SPAC22G7.04.1:exon:3	SPAC22G7.04.1:exon:2	99	1	0	0	0	0	0	0	0	0	0	0	0	0	0	0	0	0	0	0	0	0	0	0	0	0	0	0	0	0	0	0	0	0	0	0	0	0	0	0	0	0	0	0	0	0	0	0
SPAC22G7.04.1:exon:4-SPAC22G7.04.1:exon:6	SPAC22G7.04.1:exon:5	578	1	0	0	0	0	0	0	0	0	0	0	0	0	0	0	0	0	0	0	0	0	0	0	0	0	0	0	0	0	0	0	0	0	0	0	0	0	0	0	0	0	0	0	0	0	0	0
SPAC22G7.09c.1:exon:5-SPAC22G7.09c.1:exon:1	SPAC22G7.09c.1:exon:4;SPAC22G7.09c.1:exon:3;SPAC22G7.09c.1:exon:2	488	3	0	0	0	0	0	0	0	0	0	0	0	0	0	0	0	0	0	0	0	0	0	0	0	0	0	0	0	0	0	0	0	0	0	0	0	0	0	0	0	0	0	0	0	0	0	0
SPAC22G7.10.1:exon:1-SPAC22G7.10.1:exon:3	SPAC22G7.10.1:exon:2	53	1	0	0	0	0	0	0	0	0	0	0	1	0	0	0	0	0	0	0	0	0	0	0	0	0	0	0	0	0	0	0	0	0	0	0	0	0	0	0	0	0	0	0	0	0	0	0
SPAC4G8.02c.1:exon:3-SPAC4G8.02c.1:exon:1	SPAC4G8.02c.1:exon:2	103	1	0	0	0	0	0	0	0	0	0	0	0	0	0	0	0	0	0	0	0	0	0	0	0	0	0	0	0	0	0	0	0	0	0	0	0	0	0	0	0	0	0	0	0	0	0	0
SPAC2G11.06.1:exon:1-SPAC2G11.06.1:exon:3	SPAC2G11.06.1:exon:2	112	1	0	0	0	0	0	0	0	0	0	0	0	0	0	0	0	0	0	0	0	0	0	0	0	0	0	0	0	0	0	0	4	0	0	0	0	0	0	0	0	0	0	0	0	0	0	0
SPAC2G11.06.1:exon:1-SPAC2G11.06.1:exon:4	SPAC2G11.06.1:exon:2;SPAC2G11.06.1:exon:3	599	2	0	0	0	0	0	0	0	0	0	0	0	0	0	0	0	0	0	0	0	0	0	0	0	0	0	0	0	0	0	0	0	0	0	0	0	0	0	0	0	0	0	0	0	0	0	0
SPAC2G11.15c.1:exon:4-SPAC2G11.15c.1:exon:2	SPAC2G11.15c.1:exon:3	116	1	0	0	0	0	0	0	0	0	0	0	0	0	0	1	0	0	0	0	0	0	0	0	0	0	2	0	0	0	0	0	0	0	0	0	0	0	0	0	0	0	0	0	0	0	0	0
SPAC222.13c.1:exon:4-SPAC222.13c.1:exon:2	SPAC222.13c.1:exon:3	325	1	0	0	0	0	0	0	0	0	0	0	0	0	0	0	0	0	0	0	0	0	0	0	0	0	0	0	0	0	0	0	0	0	0	0	0	0	0	0	0	0	0	0	0	0	0	0
SPAC222.16c.1:exon:7-SPAC222.16c.1:exon:5	SPAC222.16c.1:exon:6	53	1	0	0	0	0	0	0	0	0	0	0	0	0	0	0	0	0	0	0	0	0	0	0	0	0	0	0	0	0	0	0	0	0	0	0	0	0	0	0	0	0	0	0	0	0	0	0
SPAC222.16c.1:exon:5-SPAC222.16c.1:exon:2	SPAC222.16c.1:exon:4;SPAC222.16c.1:exon:3	189	2	0	0	0	0	0	0	0	0	0	0	0	0	0	0	0	0	0	0	0	0	0	0	0	0	0	0	0	0	0	0	0	0	0	0	0	0	0	0	0	0	0	0	0	0	0	0
SPAC139.06.1:exon:1-SPAC139.06.1:exon:5	SPAC139.06.1:exon:2;SPAC139.06.1:exon:3;SPAC139.06.1:exon:4	439	3	0	0	0	0	0	0	0	0	0	0	0	0	0	0	0	0	0	0	0	0	0	0	0	0	0	0	0	0	0	0	0	0	0	0	0	0	0	0	0	0	0	0	0	0	0	0
SPAC23C4.02.1:exon:1-SPAC23C4.02.1:exon:3	SPAC23C4.02.1:exon:2	53	1	0	0	0	0	0	0	0	0	0	0	0	0	0	0	0	0	0	0	0	0	0	0	0	0	0	0	0	0	0	0	0	0	0	0	0	0	0	0	0	0	0	0	0	0	0	0
SPAC23C4.02.1:exon:2-SPAC23C4.02.1:exon:4	SPAC23C4.02.1:exon:3	228	1	0	0	0	0	0	0	0	0	0	1	0	0	0	0	0	0	0	0	0	0	0	0	0	0	0	0	0	0	0	0	0	0	0	0	0	0	0	0	0	0	0	0	0	0	0	0
SPAC23C4.02.1:exon:2-SPAC23C4.02.1:exon:5	SPAC23C4.02.1:exon:3;SPAC23C4.02.1:exon:4	317	2	0	0	0	0	0	0	0	0	0	0	0	0	0	0	0	0	0	0	0	0	0	0	0	0	0	0	0	0	0	0	0	0	0	0	0	0	0	0	0	0	0	0	0	0	0	0
SPAC23C4.17.1:exon:1-SPAC23C4.17.1:exon:5	SPAC23C4.17.1:exon:2;SPAC23C4.17.1:exon:3;SPAC23C4.17.1:exon:4	1472	3	0	0	0	0	0	0	0	0	0	0	0	0	0	0	0	0	0	0	0	0	0	0	0	0	0	0	0	0	0	0	0	0	0	0	0	0	0	0	0	0	0	0	0	0	0	0
SPAC56F8.05c.1:exon:4-SPAC56F8.05c.1:exon:2	SPAC56F8.05c.1:exon:3	168	1	0	0	0	0	0	0	0	0	0	2	0	0	0	0	0	0	0	0	0	0	0	0	0	0	0	0	0	0	0	0	0	0	0	0	0	0	0	0	0	2	3	0	0	0	0	0
SPAC56F8.05c.1:exon:4-SPAC56F8.05c.1:exon:1	SPAC56F8.05c.1:exon:3;SPAC56F8.05c.1:exon:2	376	2	0	0	0	0	0	0	0	0	0	0	0	0	0	0	0	0	0	0	0	0	0	0	0	0	0	0	0	0	0	0	0	0	0	0	0	0	0	0	0	0	1	0	0	0	0	0
SPAC22A12.14c.1:exon:3-SPAC22A12.14c.1:exon:1	SPAC22A12.14c.1:exon:2	51	1	0	0	0	0	0	0	0	0	0	0	0	0	0	0	0	0	0	0	0	0	0	0	0	0	0	0	0	0	0	0	0	0	0	0	0	0	0	0	0	0	0	0	0	0	0	0
SPAC4C5.02c.1:exon:4-SPAC4C5.02c.1:exon:2	SPAC4C5.02c.1:exon:3	160	1	0	0	0	0	0	0	0	0	0	0	0	0	0	1	0	0	0	0	0	0	0	0	0	0	0	0	0	0	0	0	0	0	0	0	0	0	0	1	0	0	0	0	0	0	0	0
SPAPB17E12.06.1:exon:2-SPAPB17E12.06.1:exon:4	SPAPB17E12.06.1:exon:3	68	1	0	0	0	0	0	0	0	0	0	0	0	0	0	0	0	0	0	0	0	0	0	0	0	0	0	0	0	0	0	0	0	0	0	0	0	0	0	0	1	0	0	0	0	0	0	0
SPAPB17E12.11.1:exon:2-SPAPB17E12.11.1:exon:4	SPAPB17E12.11.1:exon:3	80	1	0	0	0	0	0	0	0	0	0	0	0	1	0	0	0	0	0	0	0	0	0	0	0	0	0	0	0	0	0	0	0	0	0	0	0	0	0	0	0	1	0	0	0	0	0	1
SPAC6F12.07.1:exon:1-SPAC6F12.07.1:exon:4	SPAC6F12.07.1:exon:2;SPAC6F12.07.1:exon:3	246	2	0	0	0	0	0	0	0	0	0	0	0	0	0	0	0	0	0	0	0	0	0	0	0	0	0	0	0	0	0	0	0	0	0	0	0	0	0	1	0	0	0	0	0	0	0	0
SPAC57A10.14.1:exon:2-SPAC57A10.14.1:three_prime_UTR:1	SPAC57A10.14.1:exon:1	371	1	0	0	0	0	0	0	0	0	0	0	0	0	0	0	0	0	0	0	0	0	0	0	0	0	0	0	0	0	0	0	0	0	0	0	0	0	0	0	0	0	0	0	0	0	0	0
SPAC20G8.05c.1:exon:4-SPAC20G8.05c.1:exon:2	SPAC20G8.05c.1:exon:3	92	1	0	0	0	0	0	0	0	0	0	0	0	0	0	0	0	0	0	0	0	0	0	0	0	0	0	0	0	0	0	0	0	0	0	0	0	0	0	0	0	0	0	0	0	0	0	0
SPAC5D6.05.1:exon:4-SPAC5D6.05.1:exon:2	SPAC5D6.05.1:exon:3	106	1	0	0	0	0	0	0	0	0	0	0	0	0	0	0	0	0	0	0	0	0	0	0	0	0	0	0	0	0	0	0	0	0	0	0	0	0	0	0	0	0	0	0	0	0	0	0
SPAC57A7.13.1:exon:3-SPAC57A7.13.1:exon:1	SPAC57A7.13.1:exon:2	606	1	0	0	0	0	0	0	0	0	0	0	0	0	0	0	0	0	0	0	0	0	0	0	0	0	0	0	0	0	0	0	0	0	0	0	0	0	0	0	0	0	0	0	0	0	0	0
SPAC167.04.1:exon:3-SPAC167.04.1:exon:1	SPAC167.04.1:exon:2	32	1	0	0	0	0	0	0	0	0	0	0	0	0	2	0	0	0	0	0	2	0	0	0	0	0	0	0	1	1	0	0	0	0	0	0	0	0	0	3	0	0	1	0	0	0	0	1
SPAC167.09.1:exon:1-SPAC167.09.1:exon:3	SPAC167.09.1:exon:2	121	1	0	0	0	0	0	0	0	0	0	0	0	0	0	0	0	0	0	0	0	0	0	0	0	0	0	0	0	0	0	0	0	0	0	0	0	0	0	0	0	0	0	0	0	0	0	0
SPAC23H4.18c.1:exon:1-SPAC23H4.18c.1:exon:3	SPAC23H4.18c.1:exon:2	150	1	0	0	0	0	0	0	0	0	0	0	0	0	0	0	0	0	0	0	0	0	0	0	0	0	0	0	0	0	0	0	0	0	0	0	0	0	0	0	0	0	0	0	0	0	0	0
SPAP27G11.05c.1:exon:4-SPAP27G11.05c.1:exon:2	SPAP27G11.05c.1:exon:3	159	1	0	0	0	0	0	0	0	0	0	0	0	0	0	0	0	0	0	0	0	0	0	0	0	0	0	0	1	0	0	0	0	0	0	0	0	0	0	0	0	0	0	0	0	0	0	0
SPAC824.05.1:exon:3-SPAC824.05.1:exon:5	SPAC824.05.1:exon:4	110	1	0	0	0	0	0	0	0	0	0	0	0	0	0	0	0	0	0	0	0	0	0	0	0	0	0	0	0	0	0	0	0	0	0	0	0	0	0	0	0	0	0	0	0	0	0	0
SPAC824.09c.1:exon:4-SPAC824.09c.1:exon:2	SPAC824.09c.1:exon:3	79	1	0	0	0	0	0	0	0	0	0	0	0	0	0	0	0	0	0	0	1	0	0	0	0	0	0	0	0	2	0	0	0	0	0	0	0	0	0	0	0	0	0	0	0	0	0	0
SPAC664.02c.1:exon:5-SPAC664.02c.1:exon:2	SPAC664.02c.1:exon:4;SPAC664.02c.1:exon:3	367	2	0	0	0	0	0	0	0	0	0	0	0	0	0	0	0	0	0	0	0	0	0	0	0	0	0	0	0	0	0	0	0	0	0	0	0	0	0	0	0	0	0	0	0	0	0	0
SPACUNK12.02c.1:exon:5-SPACUNK12.02c.1:exon:3	SPACUNK12.02c.1:exon:4	55	1	0	0	0	0	0	0	0	0	0	0	0	0	0	0	0	0	0	0	0	0	0	0	0	0	0	0	0	0	0	2	0	0	0	0	0	0	1	0	1	0	0	0	0	0	0	0
SPAC1002.07c.1:exon:4-SPAC1002.07c.1:exon:1	SPAC1002.07c.1:exon:3;SPAC1002.07c.1:exon:2	142	2	0	0	0	0	0	0	0	0	0	0	0	0	0	0	0	0	0	0	0	0	0	0	0	0	0	0	0	0	0	0	0	0	0	0	0	0	0	0	0	0	0	0	0	0	0	0
SPAC9G1.05.1:exon:1-SPAC9G1.05.1:exon:3	SPAC9G1.05.1:exon:2	124	1	0	0	0	0	0	0	0	0	0	0	0	0	1	0	0	0	0	0	1	0	0	0	0	0	0	0	0	0	0	0	0	0	0	0	0	0	0	0	0	0	0	0	0	0	0	0
SPAC9G1.05.1:exon:1-SPAC9G1.05.1:exon:4	SPAC9G1.05.1:exon:2;SPAC9G1.05.1:exon:3	226	2	0	0	0	0	0	0	0	0	0	0	0	0	0	0	0	0	0	0	0	0	0	0	0	0	0	0	0	0	0	0	0	0	0	0	0	0	0	0	0	0	0	0	0	0	0	0
SPAC9G1.05.1:exon:2-SPAC9G1.05.1:exon:5	SPAC9G1.05.1:exon:3;SPAC9G1.05.1:exon:4	148	2	0	0	0	0	0	0	0	0	0	0	1	0	0	0	0	0	0	0	0	0	0	0	0	0	0	0	0	0	0	0	0	0	0	0	0	0	0	0	0	0	0	0	0	0	0	0
SPAC9G1.05.1:exon:2-SPAC9G1.05.1:exon:6	SPAC9G1.05.1:exon:3;SPAC9G1.05.1:exon:4;SPAC9G1.05.1:exon:5	194	3	0	0	0	0	0	0	0	0	0	1	0	0	0	0	0	2	1	0	0	0	0	0	0	0	0	0	0	0	0	0	0	0	0	0	0	0	0	0	0	0	0	0	0	0	0	0
SPAC9G1.05.1:exon:2-SPAC9G1.05.1:exon:7	SPAC9G1.05.1:exon:3;SPAC9G1.05.1:exon:4;SPAC9G1.05.1:exon:5;SPAC9G1.05.1:exon:6	1136	4	0	0	0	0	0	0	0	0	0	0	0	0	0	0	0	0	0	0	0	0	0	0	0	0	0	0	0	0	0	0	0	0	0	0	0	0	0	0	0	0	0	0	0	0	0	0
SPAC732.01.1:exon:1-SPAC732.01.1:exon:4	SPAC732.01.1:exon:2;SPAC732.01.1:exon:3	142	2	0	0	0	0	0	0	0	0	0	0	1	0	0	0	0	0	0	0	0	0	0	0	0	0	0	0	0	0	0	0	0	0	0	0	0	0	0	0	0	0	0	0	0	0	0	0
SPAC732.01.1:exon:2-SPAC732.01.1:exon:4	SPAC732.01.1:exon:3	110	1	0	0	0	0	0	0	0	0	0	0	0	0	0	0	2	1	0	0	0	0	0	0	0	0	0	0	0	0	0	0	0	0	0	0	0	0	0	0	0	0	0	0	0	0	0	0
SPAC732.01.1:exon:2-SPAC732.01.1:exon:5	SPAC732.01.1:exon:3;SPAC732.01.1:exon:4	146	2	0	0	0	0	0	0	0	0	0	0	0	0	0	0	0	0	0	0	0	0	0	0	0	0	0	0	0	0	0	0	0	0	0	0	0	0	0	0	0	0	0	0	0	0	0	0
SPAC3C7.07c.1:exon:4-SPAC3C7.07c.1:exon:2	SPAC3C7.07c.1:exon:3	71	1	0	0	0	0	0	0	0	0	0	1	0	0	0	0	0	0	0	0	0	0	0	0	0	0	0	0	1	0	0	0	0	0	0	0	0	0	0	0	0	0	0	0	0	0	0	0
SPAC631.01c.1:exon:3-SPAC631.01c.1:exon:1	SPAC631.01c.1:exon:2	397	1	0	0	0	0	0	0	0	0	0	0	0	0	0	0	0	0	0	0	0	0	0	0	0	0	0	0	0	0	0	0	0	0	0	0	0	0	0	0	0	0	0	0	0	0	0	0
SPAC20H4.09.1:exon:3-SPAC20H4.09.1:exon:6	SPAC20H4.09.1:exon:4;SPAC20H4.09.1:exon:5	1029	2	0	0	0	0	0	0	0	0	0	0	0	0	0	0	0	0	0	0	0	0	0	0	0	0	0	0	0	0	0	0	0	0	0	0	0	0	0	0	0	0	0	0	0	0	0	0
SPAC23C11.11.1:exon:2-SPAC23C11.11.1:exon:4	SPAC23C11.11.1:exon:3	313	1	0	0	0	0	0	0	0	0	0	0	1	0	1	0	0	0	0	0	4	0	0	0	0	0	0	0	0	0	0	0	0	0	0	0	0	0	0	0	0	0	0	0	0	0	0	0
SPAC13F5.06c.1:exon:4-SPAC13F5.06c.1:exon:2	SPAC13F5.06c.1:exon:3	2035	1	0	0	0	0	0	0	0	0	0	0	0	0	0	0	0	0	0	0	0	0	0	0	0	0	0	0	0	0	0	0	0	0	0	0	0	0	0	0	0	0	0	0	0	0	0	0
SPAC32A11.01.1:exon:1-SPAC32A11.01.1:exon:3	SPAC32A11.01.1:exon:2	496	1	0	0	0	0	0	0	0	0	0	0	1	0	0	0	0	0	0	0	0	0	0	0	0	0	0	0	0	0	0	0	0	0	0	0	0	0	0	0	0	0	0	0	0	0	0	0
SPAC823.16c.1:exon:5-SPAC823.16c.1:exon:2	SPAC823.16c.1:exon:4;SPAC823.16c.1:exon:3	181	2	0	0	0	0	0	0	0	0	0	0	0	0	0	0	0	0	0	0	0	0	0	0	0	0	0	0	0	0	0	0	0	0	0	0	0	0	0	0	0	1	0	0	0	0	0	0
SPAC6F6.07c.1:exon:3-SPAC6F6.07c.1:exon:1	SPAC6F6.07c.1:exon:2	47	1	0	0	0	0	0	0	0	0	0	0	0	0	0	1	0	0	0	0	0	0	0	0	0	0	0	0	0	1	0	0	0	0	0	0	2	0	0	1	0	0	0	0	0	0	0	0
SPAC6F6.16c.1:five_prime_UTR:2-SPAC6F6.16c.1:exon:5	SPAC6F6.16c.1:exon:6	387	1	0	0	0	0	0	0	0	0	0	0	0	0	0	0	0	0	0	0	0	0	0	0	0	0	0	0	0	0	0	0	0	0	0	0	0	0	0	0	0	0	0	0	0	0	0	0
SPAC1805.01c.1:exon:3-SPAC1805.01c.1:exon:1	SPAC1805.01c.1:exon:2	2077	1	0	0	0	0	0	0	0	0	0	0	0	0	0	0	0	0	0	0	0	0	0	0	0	0	0	0	0	0	0	0	0	0	0	0	0	0	0	0	0	0	0	0	0	0	0	0
SPAC3G9.13c.1:exon:3-SPAC3G9.13c.1:exon:5	SPAC3G9.13c.1:exon:4	122	1	0	0	0	0	0	0	0	0	0	1	0	0	0	0	0	0	0	0	0	0	0	0	0	0	0	0	0	2	0	0	0	0	0	0	0	0	0	0	0	0	0	0	0	0	0	0
SPAC6G9.07c.1:exon:3-SPAC6G9.07c.1:exon:1	SPAC6G9.07c.1:exon:2	124	1	0	0	0	0	0	0	0	0	0	0	0	0	1	1	0	0	0	0	0	0	0	0	0	0	0	0	0	0	0	0	0	0	0	0	0	0	0	0	0	0	0	0	0	0	0	0
SPAC26A3.10.1:exon:1-SPAC26A3.10.1:exon:3	SPAC26A3.10.1:exon:2	125	1	0	0	0	0	0	0	0	0	0	0	0	0	0	0	0	0	0	0	0	0	0	0	0	0	0	0	0	0	0	0	0	0	0	0	0	0	0	0	0	0	0	0	0	0	0	0
SPAC8E11.07c.1:exon:1-SPAC8E11.07c.1:exon:3	SPAC8E11.07c.1:exon:2	87	1	0	0	0	0	0	0	0	0	0	0	0	0	0	0	0	0	0	0	0	0	0	0	0	0	0	0	0	0	0	0	0	0	0	0	0	1	4	0	0	0	0	0	0	0	0	0
SPAC8E11.04c.1:exon:3-SPAC8E11.04c.1:exon:5	SPAC8E11.04c.1:exon:4	146	1	0	0	0	0	0	0	0	0	0	0	0	0	0	0	0	0	0	0	0	0	0	0	0	0	0	0	0	0	0	0	0	0	0	0	0	0	0	0	0	0	0	0	0	0	0	0
SPAC959.09c.1:exon:8-SPAC959.09c.1:exon:6	SPAC959.09c.1:exon:7	60	1	0	0	0	0	0	0	0	0	0	0	0	0	0	0	0	0	0	0	0	0	0	0	0	0	0	0	0	0	0	0	0	0	0	0	0	0	0	0	0	0	0	0	0	0	0	0
SPAC3H5.13.1:exon:1-SPAC3H5.13.1:exon:3	SPAC3H5.13.1:exon:2	122	1	0	0	0	0	0	0	0	0	0	0	0	0	0	0	0	0	0	0	0	0	0	0	0	0	0	0	0	0	0	0	0	0	0	0	0	0	0	0	0	0	0	0	0	0	0	0
SPAC3A11.06.1:exon:9-SPAC3A11.06.1:exon:5	SPAC3A11.06.1:exon:8;SPAC3A11.06.1:exon:7;SPAC3A11.06.1:exon:6	693	3	0	0	0	0	0	0	0	0	0	0	0	0	0	0	0	0	0	0	0	0	0	0	0	0	0	0	0	0	0	0	0	0	0	0	0	0	0	0	0	0	0	0	0	0	0	0
SPAC3A11.04.1:exon:2-SPAC3A11.04.1:three_prime_UTR:1	SPAC3A11.04.1:exon:1	1148	1	0	0	0	0	0	0	0	0	0	0	0	0	0	0	0	0	0	0	0	0	0	0	0	0	0	0	0	0	0	0	0	0	0	0	0	0	0	0	0	0	0	0	0	0	0	0
SPAC328.05.1:exon:1-SPAC328.05.1:exon:4	SPAC328.05.1:exon:2;SPAC328.05.1:exon:3	432	2	0	0	0	0	0	0	0	0	0	0	0	0	0	0	0	0	0	0	0	0	0	0	0	0	0	0	0	0	0	0	0	0	0	0	0	0	0	0	0	0	0	0	0	0	0	0
SPAC328.05.1:exon:2-SPAC328.05.1:exon:4	SPAC328.05.1:exon:3	102	1	0	0	0	0	0	0	0	0	0	1	0	0	0	0	0	0	0	0	0	0	0	0	0	0	0	0	0	0	0	0	0	1	0	0	0	0	0	1	0	0	0	0	0	0	0	0
SPAC328.05.1:exon:2-SPAC328.05.1:exon:5	SPAC328.05.1:exon:3;SPAC328.05.1:exon:4	204	2	0	0	0	0	0	0	0	0	0	0	0	0	0	0	0	0	0	0	0	0	0	0	0	0	0	0	0	0	0	0	0	0	0	0	0	0	0	0	0	0	0	0	0	0	0	0
SPAC328.05.1:exon:2-SPAC328.05.1:exon:6	SPAC328.05.1:exon:3;SPAC328.05.1:exon:4;SPAC328.05.1:exon:5	597	3	0	0	0	0	0	0	0	0	0	0	0	0	0	0	0	0	0	0	0	0	0	0	0	0	0	0	0	0	0	0	0	0	0	0	0	0	0	0	0	0	0	0	0	0	0	0
SPAC328.05.1:exon:3-SPAC328.05.1:exon:6	SPAC328.05.1:exon:4;SPAC328.05.1:exon:5	495	2	0	0	0	0	0	0	0	0	0	0	0	0	0	0	0	0	0	0	0	0	0	0	0	0	0	0	0	0	0	0	0	0	0	0	0	0	0	0	0	0	0	0	0	0	0	0
SPAC16E8.14c.1:exon:5-SPAC16E8.14c.1:exon:1	SPAC16E8.14c.1:exon:4;SPAC16E8.14c.1:exon:3;SPAC16E8.14c.1:exon:2	439	3	0	0	0	0	0	0	0	0	0	1	0	0	0	0	0	0	0	0	0	0	0	0	0	0	0	0	0	0	0	0	0	0	0	0	0	0	0	0	0	1	0	0	0	0	0	0
SPAC1B1.04c.1:exon:8-SPAC1B1.04c.1:exon:1	SPAC1B1.04c.1:exon:7;SPAC1B1.04c.1:exon:6;SPAC1B1.04c.1:exon:5;SPAC1B1.04c.1:exon:4;SPAC1B1.04c.1:exon:3;SPAC1B1.04c.1:exon:2	1958	6	0	0	0	0	0	0	0	0	0	0	1	0	0	0	0	0	0	0	0	0	0	0	0	0	0	0	0	0	0	0	0	0	0	0	0	0	0	0	0	0	0	0	0	0	0	0
SPAC1B1.04c.1:exon:4-SPAC1B1.04c.1:exon:2	SPAC1B1.04c.1:exon:3	280	1	0	0	0	0	0	0	0	0	0	0	0	0	0	0	0	0	0	0	0	0	0	0	0	0	0	0	0	0	0	0	0	0	0	0	0	0	0	0	0	0	0	0	0	0	0	0
SPAC1142.02c.1:exon:3-SPAC1142.02c.1:exon:1	SPAC1142.02c.1:exon:2	621	1	0	0	0	0	0	0	0	0	0	1	0	0	0	0	0	1	0	0	0	0	0	0	0	0	0	0	0	0	0	0	0	0	0	0	0	0	0	1	0	1	0	0	0	0	0	0
SPAC8C9.15c.1:exon:4-SPAC8C9.15c.1:exon:1	SPAC8C9.15c.1:exon:3;SPAC8C9.15c.1:exon:2	187	2	0	0	0	0	0	0	0	0	0	0	0	0	0	0	0	0	0	0	0	0	0	0	0	0	0	0	0	0	0	0	0	0	0	0	0	0	0	0	0	0	0	0	0	0	0	0
SPAC15A10.13.1:exon:4-SPAC15A10.13.1:exon:6	SPAC15A10.13.1:exon:5	129	1	0	0	0	0	0	0	0	0	0	0	0	0	0	0	0	0	0	0	0	0	0	0	0	0	0	0	0	0	2	0	0	0	0	0	0	0	2	0	0	0	0	0	0	0	0	0
SPAC15A10.13.1:exon:4-SPAC15A10.13.1:exon:7	SPAC15A10.13.1:exon:5;SPAC15A10.13.1:exon:6	302	2	0	0	0	0	0	0	0	0	0	0	0	0	0	0	0	0	0	0	0	0	0	0	0	0	0	0	0	0	0	0	0	0	0	0	0	0	0	0	0	0	0	0	0	0	0	0
SPAC15A10.15.1:exon:3-SPAC15A10.15.1:exon:5	SPAC15A10.15.1:exon:4	68	1	0	0	0	0	0	0	0	0	0	0	0	0	0	0	1	1	0	0	0	0	0	0	0	0	0	0	0	0	1	0	0	0	0	0	0	0	0	0	0	0	0	0	0	0	0	0
SPAC15E1.08.1:exon:2-SPAC15E1.08.1:exon:5	SPAC15E1.08.1:exon:3;SPAC15E1.08.1:exon:4	160	2	0	0	0	0	0	0	0	0	0	0	0	0	0	0	0	0	0	0	0	0	0	0	0	0	0	0	0	0	0	0	0	0	0	0	0	0	0	0	0	0	0	0	0	0	0	0
SPAC1556.05c.1:exon:4-SPAC1556.05c.1:exon:2	SPAC1556.05c.1:exon:3	10	1	0	0	0	0	0	0	0	0	0	0	0	0	0	0	0	1	1	0	0	0	0	0	0	0	0	0	0	0	1	1	0	0	1	0	0	0	0	1	1	0	0	0	0	0	1	1
SPAC4H3.04c.1:exon:3-SPAC4H3.04c.1:exon:1	SPAC4H3.04c.1:exon:2	182	1	0	0	0	0	0	0	0	0	0	0	0	0	0	0	0	0	0	0	0	0	0	0	0	0	1	0	0	0	0	0	0	0	0	0	0	0	0	0	2	0	1	0	0	0	0	0
SPAC2F3.17c.1:exon:3-SPAC2F3.17c.1:exon:1	SPAC2F3.17c.1:exon:2	114	1	0	0	0	0	0	0	0	0	0	0	0	0	0	0	0	0	0	0	0	0	0	0	0	0	0	0	0	0	0	0	0	0	0	0	0	0	0	0	0	0	0	0	0	0	0	0
SPAC27E2.02.1:exon:1-SPAC27E2.02.1:exon:3	SPAC27E2.02.1:exon:2	120	1	0	0	0	0	0	0	0	0	0	0	0	0	0	0	0	0	0	0	0	0	0	0	0	0	0	0	0	0	0	0	0	0	0	0	2	0	0	0	0	0	0	0	0	0	0	0
SPAC27E2.10c.1:exon:4-SPAC27E2.10c.1:exon:1	SPAC27E2.10c.1:exon:3;SPAC27E2.10c.1:exon:2	446	2	0	0	0	0	0	0	0	0	0	0	0	0	0	0	0	0	0	0	0	0	0	0	0	0	0	0	0	0	0	0	0	0	0	0	0	0	0	0	0	0	0	0	0	0	0	0
SPAC19G12.07c.1:exon:6-SPAC19G12.07c.1:exon:4	SPAC19G12.07c.1:exon:5	138	1	0	0	0	0	0	0	0	0	0	0	0	0	0	0	0	0	0	0	0	0	0	0	0	0	0	0	0	0	0	0	0	0	0	0	0	0	0	0	0	0	0	0	0	0	0	0
SPAC19G12.07c.1:exon:6-SPAC19G12.07c.1:exon:2	SPAC19G12.07c.1:exon:5;SPAC19G12.07c.1:exon:4;SPAC19G12.07c.1:exon:3	633	3	0	0	0	0	0	0	0	0	0	0	0	0	0	0	0	0	0	0	0	0	0	0	0	0	0	0	0	0	0	0	0	0	0	0	0	0	0	0	0	0	0	0	0	0	0	0
SPAC2C4.03c.1:exon:3-SPAC2C4.03c.1:exon:1	SPAC2C4.03c.1:exon:2	113	1	0	0	0	0	0	0	0	0	0	0	0	0	0	0	0	0	0	0	0	0	0	0	0	0	0	0	0	0	0	0	0	0	0	0	0	0	0	0	0	0	0	0	0	0	0	0
SPAC23D3.13c.1:exon:4-SPAC23D3.13c.1:exon:1	SPAC23D3.13c.1:exon:3;SPAC23D3.13c.1:exon:2	192	2	0	0	0	0	0	0	0	0	0	0	0	0	0	0	0	0	0	0	0	0	0	0	0	0	0	0	0	0	0	0	0	0	0	0	0	0	0	0	0	0	0	0	0	0	0	0
SPAC29E6.08.1:exon:2-SPAC29E6.08.1:exon:4	SPAC29E6.08.1:exon:3	261	1	0	0	0	0	0	0	0	0	0	0	0	0	0	0	0	0	0	0	0	0	0	0	0	0	0	0	0	0	0	0	0	0	0	0	0	0	0	1	0	0	0	0	0	0	0	0
SPAC16.02c.1:exon:10-SPAC16.02c.1:exon:4	SPAC16.02c.1:exon:9;SPAC16.02c.1:exon:8;SPAC16.02c.1:exon:7;SPAC16.02c.1:exon:6;SPAC16.02c.1:exon:5	223	5	0	0	0	0	0	0	0	0	0	0	1	0	0	0	0	0	0	0	0	0	0	0	0	0	0	0	0	0	0	0	0	0	0	0	0	0	0	0	0	0	0	0	0	0	0	0
SPAC16.02c.1:exon:9-SPAC16.02c.1:exon:4	SPAC16.02c.1:exon:8;SPAC16.02c.1:exon:7;SPAC16.02c.1:exon:6;SPAC16.02c.1:exon:5	137	4	0	0	0	0	0	0	0	0	0	0	0	0	0	0	0	0	0	0	0	0	0	0	0	0	0	0	0	0	0	0	0	0	0	0	0	0	0	0	0	1	0	0	0	0	0	0
SPAC16.02c.1:exon:8-SPAC16.02c.1:exon:5	SPAC16.02c.1:exon:7;SPAC16.02c.1:exon:6	31	2	0	0	0	0	0	0	0	0	0	0	0	0	0	0	0	0	0	0	0	0	0	0	0	0	0	0	0	0	0	0	0	0	0	0	0	0	0	0	0	0	0	0	0	0	0	0
SPAC16.02c.1:exon:7-SPAC16.02c.1:exon:4	SPAC16.02c.1:exon:6;SPAC16.02c.1:exon:5	94	2	0	0	0	0	0	0	0	0	0	0	0	0	0	0	0	0	0	0	0	0	0	0	0	0	0	0	0	0	0	0	0	0	0	0	0	0	0	0	0	0	0	0	0	0	0	0
SPAC16.02c.1:exon:6-SPAC16.02c.1:exon:3	SPAC16.02c.1:exon:5;SPAC16.02c.1:exon:4	139	2	0	0	0	0	0	0	0	0	0	0	0	0	0	0	0	0	1	0	0	0	0	0	0	0	0	0	0	0	0	0	0	0	0	0	0	0	0	0	0	0	0	0	0	0	0	0
SPAC17C9.11c.1:exon:1-SPAC17C9.11c.1:exon:3	SPAC17C9.11c.1:exon:2	577	1	0	0	0	0	0	0	0	0	0	0	0	0	0	0	0	1	0	0	0	0	0	0	0	0	0	0	0	0	0	0	0	0	0	0	0	0	0	0	0	0	0	0	0	0	0	0
SPAC27D7.08c.1:exon:6-SPAC27D7.08c.1:exon:4	SPAC27D7.08c.1:exon:5	11	1	0	0	0	0	0	0	0	0	0	0	0	0	0	0	0	1	0	0	0	0	0	0	0	0	0	0	0	0	0	0	0	0	0	0	0	0	0	0	0	0	1	0	0	0	0	0
SPAC27D7.08c.1:exon:4-SPAC27D7.08c.1:exon:2	SPAC27D7.08c.1:exon:3	377	1	0	0	0	0	0	0	0	0	0	0	0	0	0	0	0	0	0	0	0	0	0	0	0	0	0	0	0	0	0	0	0	0	0	0	0	0	0	0	0	0	0	0	0	0	0	0
SPAC1093.04c.1:five_prime_UTR:2-SPAC1093.04c.1:exon:3	SPAC1093.04c.1:five_prime_UTR:1;SPAC1093.04c.1:exon:4	199	2	0	0	0	0	0	0	0	0	0	0	0	0	1	0	0	0	0	1	0	0	0	0	0	1	0	0	0	0	0	0	0	0	0	0	0	0	0	0	0	0	1	0	0	0	0	0
SPAC1093.04c.1:exon:4-SPAC1093.04c.1:exon:2	SPAC1093.04c.1:exon:3	583	1	0	0	0	0	0	0	0	0	0	1	1	0	0	0	0	0	0	0	0	0	0	0	0	0	0	0	0	0	0	0	0	0	0	0	0	0	0	0	0	0	0	0	0	0	0	0
SPAC30C2.08.1:exon:2-SPAC30C2.08.1:exon:4	SPAC30C2.08.1:exon:3	97	1	0	0	0	0	0	0	0	0	0	0	0	0	0	0	0	0	1	0	0	0	0	0	0	0	0	0	0	0	0	0	0	0	0	0	0	0	0	0	0	1	0	0	0	0	0	0
SPAC458.06.1:exon:1-SPAC458.06.1:exon:4	SPAC458.06.1:exon:2;SPAC458.06.1:exon:3	190	2	0	0	0	0	0	0	0	0	0	0	0	0	0	0	0	0	0	0	0	0	0	0	0	0	0	0	0	0	0	0	0	0	0	0	0	0	0	0	0	0	0	0	0	0	0	0
SPAPYUG7.04c.1:exon:5-SPAPYUG7.04c.1:exon:1	SPAPYUG7.04c.1:exon:4;SPAPYUG7.04c.1:exon:3;SPAPYUG7.04c.1:exon:2	250	3	0	0	0	0	0	0	0	0	0	0	0	0	0	0	0	0	0	0	0	0	0	0	0	0	0	0	0	0	0	0	0	0	0	0	0	0	0	0	0	0	0	0	0	0	0	0
SPAC22F8.07c.1:exon:6-SPAC22F8.07c.1:exon:3	SPAC22F8.07c.1:exon:5;SPAC22F8.07c.1:exon:4	200	2	0	0	0	0	0	0	0	0	0	0	0	0	0	0	0	0	0	0	0	0	0	0	0	0	0	0	0	0	0	0	0	0	0	0	0	0	0	0	0	0	0	0	0	0	0	0
SPAC22F8.07c.1:exon:4-SPAC22F8.07c.1:exon:1	SPAC22F8.07c.1:exon:3;SPAC22F8.07c.1:exon:2	485	2	0	0	0	0	0	0	0	0	0	0	0	0	0	0	0	0	0	0	0	0	0	0	0	0	0	0	0	0	0	0	0	0	0	0	0	0	0	0	0	0	0	0	0	0	0	0
SPAC4F10.11.1:exon:1-SPAC4F10.11.1:exon:3	SPAC4F10.11.1:exon:2	597	1	0	0	0	0	0	0	0	0	0	0	0	0	0	0	0	0	0	0	0	0	0	0	0	0	0	0	0	0	0	0	0	0	0	0	0	0	0	0	0	0	0	0	0	0	0	0
SPAC19B12.05c.1:exon:6-SPAC19B12.05c.1:exon:3	SPAC19B12.05c.1:exon:5;SPAC19B12.05c.1:exon:4	172	2	0	0	0	0	0	0	0	0	0	0	0	0	0	0	0	0	0	0	0	0	0	0	0	0	0	0	0	0	0	0	0	0	0	0	0	0	0	0	0	0	0	0	0	0	0	0
SPAC19B12.05c.1:exon:6-SPAC19B12.05c.1:exon:2	SPAC19B12.05c.1:exon:5;SPAC19B12.05c.1:exon:4;SPAC19B12.05c.1:exon:3	1351	3	0	0	0	0	0	0	0	0	0	0	0	0	0	0	0	0	1	0	0	0	0	0	0	0	0	0	0	0	0	0	0	0	0	0	0	0	0	0	0	0	0	0	0	0	0	0
SPAC19B12.05c.1:exon:3-SPAC19B12.05c.1:exon:1	SPAC19B12.05c.1:exon:2	305	1	0	0	0	0	0	0	0	0	0	0	0	0	0	0	0	0	0	0	0	0	0	0	0	0	0	0	0	0	0	0	0	0	0	0	0	0	0	0	0	0	0	0	0	0	0	0
SPAC19B12.06c.1:exon:4-SPAC19B12.06c.1:exon:2	SPAC19B12.06c.1:exon:3	217	1	0	0	0	0	0	0	0	0	0	0	0	0	0	0	0	0	0	0	0	0	0	0	0	0	0	0	0	0	0	0	0	0	0	0	0	0	0	0	0	0	1	0	0	0	0	0
SPAC19B12.07c.1:exon:3-SPAC19B12.07c.1:exon:1	SPAC19B12.07c.1:exon:2	216	1	0	0	0	0	0	0	0	0	0	0	0	0	0	0	0	0	0	0	0	0	0	0	0	0	0	0	0	0	0	0	0	0	0	0	0	0	0	1	0	0	0	0	0	0	1	0
SPAC19B12.10.1:exon:1-SPAC19B12.10.1:exon:3	SPAC19B12.10.1:exon:2	135	1	0	0	0	0	0	0	0	0	0	0	0	0	0	0	0	0	0	0	0	0	0	0	0	0	0	0	0	0	0	0	0	0	0	0	0	0	0	0	0	0	0	0	0	0	0	0
SPAC1952.13.1:exon:1-SPAC1952.13.1:exon:3	SPAC1952.13.1:exon:2	282	1	0	0	0	0	0	0	0	0	0	0	0	0	0	0	0	0	0	0	0	0	0	0	0	0	0	0	0	0	0	0	0	0	0	0	0	0	0	0	0	0	0	0	0	0	1	0
SPAC1952.16.1:five_prime_UTR:1-SPAC1952.16.1:exon:8	SPAC1952.16.1:exon:1;SPAC1952.16.1:exon:2;SPAC1952.16.1:exon:3;SPAC1952.16.1:exon:4;SPAC1952.16.1:exon:5;SPAC1952.16.1:exon:6;SPAC1952.16.1:exon:7	1879	7	0	0	0	0	0	0	0	0	0	0	0	0	0	0	0	0	0	0	0	0	0	0	0	0	0	0	0	0	0	0	0	0	0	0	0	0	0	0	0	0	0	0	0	0	0	0
SPAC1952.16.1:exon:4-SPAC1952.16.1:exon:6	SPAC1952.16.1:exon:5	87	1	0	0	0	0	0	0	0	0	0	0	0	0	0	0	0	0	0	0	0	0	0	0	0	0	0	0	0	0	0	0	0	0	0	0	0	0	0	0	0	0	0	0	0	0	0	0
SPAC1952.16.1:exon:4-SPAC1952.16.1:exon:8	SPAC1952.16.1:exon:5;SPAC1952.16.1:exon:6;SPAC1952.16.1:exon:7	513	3	0	0	0	0	0	0	0	0	0	0	1	0	0	0	0	0	0	0	0	0	0	0	0	0	0	0	0	0	0	0	0	0	0	0	0	0	0	0	0	0	0	0	0	0	0	0
SPAC890.03.1:exon:1-SPAC890.03.1:exon:4	SPAC890.03.1:exon:2;SPAC890.03.1:exon:3	144	2	0	0	0	0	0	0	0	0	0	0	0	0	0	0	0	0	0	0	0	0	0	0	0	0	0	0	0	0	0	0	0	0	0	0	0	0	0	0	0	0	0	0	0	0	0	0
SPAC890.03.1:exon:2-SPAC890.03.1:exon:4	SPAC890.03.1:exon:3	50	1	0	0	0	0	0	0	0	0	0	0	0	2	0	0	2	3	0	0	0	0	0	0	0	0	0	1	1	0	3	0	3	0	1	0	0	1	0	0	0	0	0	0	0	0	1	0
SPAC890.07c.1:exon:9-SPAC890.07c.1:exon:7	SPAC890.07c.1:exon:8	4	1	0	0	0	0	0	0	0	0	0	1	0	0	0	0	0	0	0	0	0	0	0	0	0	0	0	0	1	0	1	0	0	0	0	0	0	0	0	0	0	0	0	0	0	0	0	0
SPAC890.07c.1:exon:5-SPAC890.07c.1:exon:3	SPAC890.07c.1:exon:4	295	1	0	0	0	0	0	0	0	0	0	1	0	0	0	0	0	0	0	0	0	0	0	0	0	0	0	0	0	0	0	0	0	0	0	0	0	0	0	0	0	0	0	0	0	0	0	0
SPAC11E3.10.1:exon:1-SPAC11E3.10.1:exon:3	SPAC11E3.10.1:exon:2	24	1	0	0	0	0	0	0	0	0	0	0	0	0	0	0	0	0	0	0	0	0	0	0	0	0	0	0	0	0	0	0	0	0	0	0	0	0	0	0	0	0	0	0	0	0	0	0
SPAC11E3.10.1:exon:3-SPAC11E3.10.1:exon:5	SPAC11E3.10.1:exon:4	30	1	0	0	0	0	0	0	0	0	0	0	0	0	0	0	0	0	0	0	0	0	0	0	0	0	0	0	0	0	0	0	0	0	0	0	0	0	0	0	0	0	0	0	0	0	0	0
SPAP8A3.09c.1:exon:5-SPAP8A3.09c.1:exon:2	SPAP8A3.09c.1:exon:4;SPAP8A3.09c.1:exon:3	1005	2	0	0	0	0	0	0	0	0	0	0	0	0	0	0	0	0	0	0	0	0	0	0	0	0	0	0	0	0	0	0	0	0	0	0	0	0	0	0	0	0	0	0	0	0	0	0
SPAP8A3.09c.1:exon:3-SPAP8A3.09c.1:exon:1	SPAP8A3.09c.1:exon:2	338	1	0	0	0	0	0	0	0	0	0	0	0	0	0	0	0	0	0	0	0	0	0	0	0	0	0	0	0	0	0	0	0	0	0	0	0	0	0	0	0	0	0	0	0	0	0	0
SPAC4D7.09.1:exon:2-SPAC4D7.09.1:exon:4	SPAC4D7.09.1:exon:3	442	1	0	0	0	0	0	0	0	0	0	0	0	0	0	0	0	0	0	0	0	0	0	0	0	0	0	0	0	0	0	0	0	0	0	0	0	0	0	0	0	0	0	0	0	0	0	0
SPAC4D7.10c.1:exon:2-SPAC4D7.10c.1:three_prime_UTR:1	SPAC4D7.10c.1:exon:1;SPAC4D7.10c.1:three_prime_UTR:2	548	2	0	0	0	0	0	0	0	0	0	0	0	0	0	0	0	0	0	0	0	0	0	0	0	0	0	0	0	0	0	0	0	0	0	0	0	0	0	0	0	0	0	0	0	0	0	0
SPAC3G6.02.1:exon:1-SPAC3G6.02.1:exon:3	SPAC3G6.02.1:exon:2	42	1	0	0	0	0	0	0	0	0	0	1	0	0	0	0	1	1	0	0	0	0	0	0	0	0	0	0	0	0	0	0	0	0	0	0	0	0	0	0	0	1	3	0	0	0	0	0
SPAC3G6.03c.1:exon:4-SPAC3G6.03c.1:exon:1	SPAC3G6.03c.1:exon:3;SPAC3G6.03c.1:exon:2	453	2	0	0	0	0	0	0	0	0	0	0	0	0	0	0	0	0	0	0	0	0	0	0	0	0	0	0	0	0	0	0	0	0	0	0	0	0	0	0	0	0	0	0	0	0	0	0
SPAC1639.01c.1:exon:3-SPAC1639.01c.1:exon:1	SPAC1639.01c.1:exon:2	361	1	0	0	0	0	0	0	0	0	0	0	2	0	0	0	0	0	1	0	0	0	0	0	0	0	0	0	0	0	0	0	0	0	0	0	0	0	0	0	0	0	0	0	0	0	0	0
SPAC1639.02c.1:exon:13-SPAC1639.02c.1:exon:11	SPAC1639.02c.1:exon:12	155	1	0	0	0	0	0	0	0	0	0	0	0	0	0	0	0	0	0	0	0	0	0	0	0	0	0	0	0	0	0	0	0	0	0	0	0	0	0	0	0	0	0	0	0	0	0	0
SPAC1639.02c.1:exon:12-SPAC1639.02c.1:exon:8	SPAC1639.02c.1:exon:11;SPAC1639.02c.1:exon:10;SPAC1639.02c.1:exon:9	1860	3	0	0	0	0	0	0	0	0	0	0	0	0	0	0	0	0	0	0	0	0	0	0	0	0	0	0	0	0	0	0	0	0	0	0	0	0	0	0	1	0	0	0	0	0	0	0
SPAC1639.02c.1:exon:12-SPAC1639.02c.1:exon:2	SPAC1639.02c.1:exon:11;SPAC1639.02c.1:exon:10;SPAC1639.02c.1:exon:9;SPAC1639.02c.1:exon:8;SPAC1639.02c.1:exon:7;SPAC1639.02c.1:exon:6;SPAC1639.02c.1:exon:5;SPAC1639.02c.1:exon:4;SPAC1639.02c.1:exon:3	2266	9	0	0	0	0	0	0	0	0	0	0	0	0	0	0	0	0	0	0	0	0	0	0	0	0	0	0	0	0	0	0	0	0	0	0	0	0	0	0	0	0	0	0	0	0	0	0
SPAC1639.02c.1:exon:6-SPAC1639.02c.1:exon:1	SPAC1639.02c.1:exon:5;SPAC1639.02c.1:exon:4;SPAC1639.02c.1:exon:3;SPAC1639.02c.1:exon:2	183	4	0	0	0	0	0	0	0	0	0	0	0	0	0	0	0	0	0	0	0	0	0	0	0	0	0	0	0	0	0	0	0	0	0	0	0	0	0	0	0	0	0	0	0	0	0	0
SPAC1639.02c.1:exon:5-SPAC1639.02c.1:exon:1	SPAC1639.02c.1:exon:4;SPAC1639.02c.1:exon:3;SPAC1639.02c.1:exon:2	116	3	0	0	0	0	0	0	0	0	0	0	0	0	0	0	0	0	0	0	0	0	0	0	0	0	0	0	0	0	0	0	0	0	0	0	0	0	0	0	0	0	0	0	0	0	0	0
SPAC1639.02c.1:exon:4-SPAC1639.02c.1:exon:2	SPAC1639.02c.1:exon:3	19	1	0	0	0	0	0	0	0	0	0	0	0	0	0	0	0	0	0	0	0	0	0	0	0	0	0	0	0	0	0	0	0	0	0	0	0	0	0	0	0	0	0	0	0	0	0	1
SPAC1639.02c.1:exon:4-SPAC1639.02c.1:exon:1	SPAC1639.02c.1:exon:3;SPAC1639.02c.1:exon:2	45	2	0	0	0	0	0	0	0	0	0	0	1	0	0	0	2	0	0	0	0	0	0	0	0	0	0	0	1	0	0	0	0	0	0	0	0	0	0	0	0	0	0	0	0	0	0	0
SPAC18B11.08c.1:exon:2-SPAC18B11.08c.1:exon:4	SPAC18B11.08c.1:exon:3	90	1	0	0	0	0	0	0	0	0	0	0	0	0	1	0	0	1	0	0	0	0	0	0	0	0	0	0	0	0	0	0	0	0	0	0	0	0	0	0	0	1	0	0	0	0	0	0
SPAC18B11.08c.1:exon:3-SPAC18B11.08c.1:exon:5	SPAC18B11.08c.1:exon:4	37	1	0	0	0	0	0	0	0	0	0	0	0	0	0	0	0	0	1	0	0	0	0	0	0	0	0	0	0	0	0	0	0	0	0	0	0	0	0	1	0	1	0	0	0	0	0	1
SPAC18B11.04.1:exon:3-SPAC18B11.04.1:exon:1	SPAC18B11.04.1:exon:2	344	1	0	0	0	0	0	0	0	0	0	0	0	0	0	0	0	0	1	0	0	0	0	0	0	0	0	0	0	0	0	0	0	0	0	0	0	0	0	0	0	0	0	0	0	0	0	0
SPAC630.11.1:exon:1-SPAC630.11.1:exon:5	SPAC630.11.1:exon:2;SPAC630.11.1:exon:3;SPAC630.11.1:exon:4	177	3	0	0	0	0	0	0	0	0	0	0	0	0	0	0	0	0	0	0	0	0	0	0	0	0	0	0	0	0	0	0	0	0	0	0	0	0	0	0	0	0	0	0	0	0	0	0
SPAC31A2.02.1:exon:2-SPAC31A2.02.1:exon:4	SPAC31A2.02.1:exon:3	93	1	0	0	0	0	0	0	0	0	0	0	0	0	0	0	0	0	0	0	0	0	0	0	0	0	0	0	0	0	0	0	0	0	0	0	0	0	0	0	0	0	0	0	0	0	0	0
SPAC31A2.15c.1:exon:4-SPAC31A2.15c.1:exon:1	SPAC31A2.15c.1:exon:3;SPAC31A2.15c.1:exon:2	697	2	0	0	0	0	0	0	0	0	0	1	0	1	0	0	2	1	0	0	0	0	0	0	0	0	0	0	0	0	0	0	0	0	0	0	0	0	0	0	0	1	0	0	0	0	0	0
SPAC24H6.03.1:exon:5-SPAC24H6.03.1:exon:1	SPAC24H6.03.1:exon:4;SPAC24H6.03.1:exon:3;SPAC24H6.03.1:exon:2	649	3	0	0	0	0	0	0	0	0	0	0	0	0	0	0	0	0	0	0	0	0	0	0	0	0	0	0	0	0	0	0	0	0	0	0	0	0	0	0	0	0	0	0	0	0	0	0
SPAC24H6.03.1:exon:4-SPAC24H6.03.1:exon:1	SPAC24H6.03.1:exon:3;SPAC24H6.03.1:exon:2	584	2	0	0	0	0	0	0	0	0	0	0	0	0	0	0	0	0	0	0	0	0	0	0	0	0	0	0	0	0	0	0	0	0	0	0	0	0	0	0	0	0	0	0	0	0	0	0
SPAC1F3.03.1:exon:1-SPAC1F3.03.1:exon:3	SPAC1F3.03.1:exon:2	430	1	0	0	0	0	0	0	0	0	0	0	0	0	0	0	0	0	0	0	0	0	0	0	0	0	0	0	0	0	0	0	0	0	0	0	0	0	0	0	0	0	0	0	0	0	0	0
SPAC1296.04.1:exon:1-SPAC1296.04.1:exon:4	SPAC1296.04.1:exon:2;SPAC1296.04.1:exon:3	292	2	0	0	0	0	0	0	0	0	0	0	0	0	0	0	0	0	0	0	0	0	0	0	0	0	0	0	0	0	0	0	0	0	0	0	0	0	0	0	0	0	0	0	0	0	0	0
SPAPJ696.01c.1:exon:3-SPAPJ696.01c.1:exon:1	SPAPJ696.01c.1:exon:2	206	1	0	0	0	0	0	0	0	0	0	0	0	0	0	0	0	0	0	0	0	0	0	0	0	0	0	0	0	0	0	0	0	0	0	0	0	0	0	0	0	0	0	0	0	0	0	0
SPAC1296.06.1:exon:1-SPAC1296.06.1:exon:5	SPAC1296.06.1:exon:2;SPAC1296.06.1:exon:3;SPAC1296.06.1:exon:4	275	3	0	0	0	0	0	0	0	0	0	0	0	0	0	0	0	0	0	0	0	0	0	0	0	0	0	0	0	0	0	0	0	0	0	0	0	0	0	0	0	0	1	0	0	0	0	0
SPAC4G8.07c.1:exon:3-SPAC4G8.07c.1:exon:1	SPAC4G8.07c.1:exon:2	249	1	0	0	0	0	0	0	0	0	0	0	1	0	0	0	0	0	0	0	0	0	0	0	0	0	0	0	0	0	0	0	0	0	0	0	0	0	0	0	0	0	0	0	0	0	0	0
SPAC4G8.12c.1:exon:5-SPAC4G8.12c.1:exon:3	SPAC4G8.12c.1:exon:4	69	1	0	0	0	0	0	0	0	0	0	1	0	0	0	0	0	0	0	0	0	0	0	0	0	0	0	0	0	0	0	0	0	0	0	0	0	0	0	0	0	0	0	0	0	0	0	0
SPAC2G11.14.1:exon:2-SPAC2G11.14.1:exon:4	SPAC2G11.14.1:exon:3	149	1	0	0	0	0	0	0	0	0	0	0	0	3	0	0	0	0	2	0	0	0	0	0	0	0	0	0	0	0	0	0	0	0	0	0	0	0	0	0	0	1	1	0	0	0	0	1
SPAC1687.17c.1:exon:3-SPAC1687.17c.1:exon:1	SPAC1687.17c.1:exon:2	66	1	0	0	0	0	0	0	0	0	0	0	0	0	0	0	0	0	0	0	0	0	0	0	0	0	2	0	0	0	0	0	0	0	0	0	0	0	0	0	0	0	0	0	0	0	0	0
SPAC222.14c.1:exon:3-SPAC222.14c.1:exon:1	SPAC222.14c.1:exon:2	86	1	0	0	0	0	0	0	0	0	0	0	0	0	0	0	0	0	0	0	0	0	0	0	0	0	0	0	0	0	0	0	0	0	0	0	0	0	0	0	0	0	0	0	0	0	0	0
SPAC821.05.1:exon:1-SPAC821.05.1:exon:3	SPAC821.05.1:exon:2	107	1	0	0	0	0	0	0	0	0	0	0	0	0	0	0	0	0	0	0	0	0	0	0	0	0	0	0	0	0	0	0	0	0	0	0	0	0	0	0	0	0	0	0	0	0	0	0
SPAC821.06.1:exon:2-SPAC821.06.1:exon:5	SPAC821.06.1:exon:3;SPAC821.06.1:exon:4	211	2	0	0	0	0	0	0	0	0	0	0	0	0	0	0	0	0	0	0	0	0	0	0	0	0	0	0	0	0	0	0	0	0	0	0	0	0	0	0	0	0	0	0	0	0	0	0
SPAC4C5.01.1:exon:3-SPAC4C5.01.1:exon:5	SPAC4C5.01.1:exon:4	95	1	0	0	0	0	0	0	0	0	0	0	0	0	0	0	0	0	1	0	0	0	0	0	0	0	0	0	0	0	0	0	0	0	0	0	0	0	2	0	0	0	1	0	0	0	0	0
SPAC4C5.01.1:exon:3-SPAC4C5.01.1:exon:6	SPAC4C5.01.1:exon:4;SPAC4C5.01.1:exon:5	179	2	0	0	0	0	0	0	0	0	0	0	0	0	0	0	0	0	0	0	0	0	0	0	0	0	0	0	0	0	0	0	0	0	0	0	0	0	0	0	0	0	0	0	0	0	0	0
SPAC1565.06c.1:exon:4-SPAC1565.06c.1:exon:2	SPAC1565.06c.1:exon:3	84	1	0	0	0	0	0	0	0	0	0	0	0	0	0	0	0	0	0	0	0	0	0	0	0	0	0	0	0	0	0	0	0	0	0	0	0	0	0	0	0	0	0	0	0	0	0	0
SPAC6F12.12.1:exon:1-SPAC6F12.12.1:exon:5	SPAC6F12.12.1:exon:2;SPAC6F12.12.1:exon:3;SPAC6F12.12.1:exon:4	836	3	0	0	0	0	0	0	0	0	0	0	1	0	0	0	0	0	0	0	0	0	0	0	0	0	0	0	0	0	0	0	0	0	0	0	0	0	0	0	0	0	0	0	0	0	0	0
SPAC6F12.12.1:exon:2-SPAC6F12.12.1:exon:4	SPAC6F12.12.1:exon:3	197	1	0	0	0	0	0	0	0	0	0	0	0	0	0	0	0	0	0	0	0	0	0	0	0	0	0	0	0	0	0	0	0	0	0	0	0	0	0	0	0	0	0	0	0	0	0	0
SPAC3A12.11c.1:exon:3-SPAC3A12.11c.1:exon:1	SPAC3A12.11c.1:exon:2	165	1	0	0	0	0	0	0	0	0	0	0	1	0	0	0	0	0	0	0	0	0	0	0	0	0	0	0	0	0	0	0	0	0	0	0	0	0	0	0	0	0	1	0	0	0	0	0
SPAC9.06c.1:exon:6-SPAC9.06c.1:exon:4	SPAC9.06c.1:exon:5	24	1	0	0	0	0	0	0	0	0	0	0	1	0	0	0	0	0	0	0	0	0	0	0	0	0	0	0	0	0	0	0	0	0	0	0	0	0	0	0	0	0	0	0	0	0	0	0
SPAC23H4.14.1:exon:5-SPAC23H4.14.1:exon:3	SPAC23H4.14.1:exon:4	78	1	0	0	0	0	0	0	0	0	0	0	0	0	0	0	0	0	0	0	0	0	0	0	0	0	0	0	0	0	0	0	0	0	0	0	0	0	0	0	0	1	0	0	0	0	0	0
SPAP27G11.06c.1:exon:3-SPAP27G11.06c.1:exon:1	SPAP27G11.06c.1:exon:2	131	1	0	0	0	0	0	0	0	0	0	0	0	0	0	0	0	0	0	0	0	0	0	0	0	0	0	0	0	0	0	0	0	0	0	0	0	0	0	0	0	0	0	0	0	0	0	0
SPAC343.05.1:exon:1-SPAC343.05.1:exon:3	SPAC343.05.1:exon:2	100	1	0	0	0	0	0	0	0	0	0	0	0	0	0	0	0	0	0	0	0	0	0	0	0	0	0	0	0	0	0	1	0	0	0	0	0	0	0	0	0	0	0	0	0	0	0	0
SPAC343.08c.1:exon:3-SPAC343.08c.1:exon:1	SPAC343.08c.1:exon:2	251	1	0	0	0	0	0	0	0	0	0	0	0	0	0	0	0	0	0	0	0	0	0	0	0	0	0	0	0	0	0	0	0	0	0	0	0	0	0	0	0	0	0	0	0	0	0	0
SPAC17A5.02c.1:exon:5-SPAC17A5.02c.1:exon:3	SPAC17A5.02c.1:exon:4	122	1	0	0	0	0	0	0	0	0	0	0	0	0	0	0	0	0	0	0	0	0	0	0	0	0	0	0	0	0	0	0	0	0	0	0	0	0	0	0	0	0	0	0	0	0	0	0
SPAC1002.15c.1:exon:4-SPAC1002.15c.1:exon:1	SPAC1002.15c.1:exon:3;SPAC1002.15c.1:exon:2	290	2	0	0	0	0	0	0	0	0	0	0	0	0	0	0	0	0	0	0	0	0	0	0	0	1	0	0	0	0	0	0	0	0	0	0	0	0	0	0	0	0	0	0	0	0	0	0
SPAP14E8.03.1:exon:1-SPAP14E8.03.1:exon:3	SPAP14E8.03.1:exon:2	97	1	0	0	0	0	0	0	0	0	0	0	0	0	0	0	0	0	0	0	0	0	0	0	0	0	0	0	0	0	0	0	0	0	0	0	0	0	0	0	0	0	0	0	0	0	0	0
SPAC3H1.09c.1:exon:4-SPAC3H1.09c.1:exon:1	SPAC3H1.09c.1:exon:3;SPAC3H1.09c.1:exon:2	882	2	0	0	0	0	0	0	0	0	0	0	0	0	0	0	0	1	0	0	0	0	0	0	0	0	0	0	0	0	0	0	0	0	0	0	0	0	0	0	0	0	1	0	0	0	0	0
SPAC3H1.09c.1:exon:3-SPAC3H1.09c.1:exon:1	SPAC3H1.09c.1:exon:2	695	1	0	0	0	0	0	0	0	0	0	0	0	0	0	0	0	0	0	0	0	0	0	0	0	0	0	0	0	0	0	0	0	0	0	0	0	0	0	0	0	1	0	0	0	0	0	0
SPAC17H9.07.1:exon:1-SPAC17H9.07.1:exon:3	SPAC17H9.07.1:exon:2	190	1	0	0	0	0	0	0	0	0	0	0	0	0	0	0	0	0	1	0	0	0	0	0	0	0	0	0	0	0	0	0	0	0	0	0	0	0	0	0	0	0	0	0	0	0	0	0
SPAC607.02c.1:exon:3-SPAC607.02c.1:exon:1	SPAC607.02c.1:exon:2	369	1	0	0	0	0	0	0	0	0	0	0	0	0	0	0	0	0	0	0	0	0	0	0	0	0	0	0	0	0	0	0	0	0	0	0	0	0	0	0	0	0	0	0	0	0	0	0
SPAC20H4.03c.1:exon:4-SPAC20H4.03c.1:exon:2	SPAC20H4.03c.1:exon:3	680	1	0	0	0	0	0	0	0	0	0	0	0	0	0	0	0	0	0	0	0	0	0	0	0	0	0	0	0	0	0	0	0	0	0	0	0	0	0	0	0	0	0	0	0	0	0	0
SPAC20H4.03c.1:exon:3-SPAC20H4.03c.1:exon:1	SPAC20H4.03c.1:exon:2	25	1	0	0	0	0	0	0	0	0	0	0	0	0	0	0	1	0	0	0	0	0	0	0	0	0	0	1	0	0	0	0	0	0	0	0	0	0	0	0	0	0	0	0	0	0	0	0
SPAC23C11.01.1:exon:1-SPAC23C11.01.1:exon:5	SPAC23C11.01.1:exon:2;SPAC23C11.01.1:exon:3;SPAC23C11.01.1:exon:4	614	3	0	0	0	0	0	0	0	0	0	0	1	0	0	0	0	0	0	0	0	0	0	0	0	0	0	0	0	0	0	0	0	0	0	0	0	0	0	0	0	0	0	0	0	0	0	0
SPAC13G7.07.1:exon:4-SPAC13G7.07.1:exon:6	SPAC13G7.07.1:exon:5	91	1	0	0	0	0	0	0	0	0	0	0	0	0	0	0	0	0	0	0	0	0	0	0	0	0	0	0	0	0	0	0	0	0	0	0	0	0	0	0	0	0	0	0	0	0	0	0
SPAC6C3.06c.1:exon:4-SPAC6C3.06c.1:exon:2	SPAC6C3.06c.1:exon:3	127	1	0	0	0	0	0	0	0	0	0	0	0	0	0	0	0	0	0	0	0	0	0	0	0	0	0	0	0	0	0	0	0	0	0	0	0	0	0	0	0	0	0	0	0	0	0	0
SPAC6C3.09.1:exon:2-SPAC6C3.09.1:exon:4	SPAC6C3.09.1:exon:3	57	1	0	0	0	0	0	0	0	0	0	1	4	0	0	0	1	0	5	0	0	0	0	0	0	0	0	2	0	0	0	0	0	0	0	0	0	0	0	1	1	2	0	0	0	0	0	0
SPAC22H10.02.1:exon:1-SPAC22H10.02.1:exon:3	SPAC22H10.02.1:exon:2	89	1	0	0	0	0	0	0	0	0	0	1	0	0	0	0	0	0	0	0	0	0	0	0	0	0	0	0	0	0	0	0	0	0	0	0	1	0	1	0	0	0	0	0	0	0	0	1
SPAC22H10.10.1:exon:2-SPAC22H10.10.1:exon:4	SPAC22H10.10.1:exon:3	100	1	0	0	0	0	0	0	0	0	0	0	0	0	0	0	0	0	0	0	0	0	0	0	0	0	0	0	0	0	0	0	0	0	0	0	0	0	0	0	0	0	0	0	0	0	0	0
SPAC4A8.10.1:five_prime_UTR:1-SPAC4A8.10.1:exon:2	SPAC4A8.10.1:exon:1	150	1	0	0	0	0	0	0	0	0	0	0	0	0	0	0	0	0	0	0	0	0	0	0	0	0	0	0	0	0	0	0	0	0	0	0	0	0	0	0	0	0	0	0	0	0	0	0
SPAC4A8.15c.1:exon:3-SPAC4A8.15c.1:exon:1	SPAC4A8.15c.1:exon:2	333	1	0	0	0	0	0	0	0	0	0	0	0	0	0	0	0	0	0	0	0	0	0	0	0	0	0	0	0	0	0	0	0	0	0	0	0	0	0	0	0	0	0	0	0	0	0	0
SPAC823.04.1:exon:1-SPAC823.04.1:exon:4	SPAC823.04.1:exon:2;SPAC823.04.1:exon:3	190	2	0	0	0	0	0	0	0	0	0	0	0	0	0	0	0	0	1	0	0	0	0	0	0	0	0	0	0	0	0	0	0	0	0	0	0	0	0	0	0	0	1	0	0	0	0	1
SPAC7D4.10.1:exon:6-SPAC7D4.10.1:exon:4	SPAC7D4.10.1:exon:5	189	1	0	0	0	0	0	0	0	0	0	0	0	0	0	1	1	0	0	0	0	0	0	0	0	0	0	0	0	1	0	0	0	0	0	0	0	0	0	0	0	0	0	0	0	0	0	0
SPAPB2B4.01c.1:exon:4-SPAPB2B4.01c.1:exon:1	SPAPB2B4.01c.1:exon:3;SPAPB2B4.01c.1:exon:2	259	2	0	0	0	0	0	0	0	0	0	0	0	0	0	0	0	0	0	0	0	0	0	0	0	0	0	0	0	0	0	0	0	0	0	0	0	0	0	0	0	0	0	0	0	0	0	0
SPAPB2B4.05.1:exon:1-SPAPB2B4.05.1:exon:3	SPAPB2B4.05.1:exon:2	154	1	0	0	0	0	0	0	0	0	0	0	0	0	0	0	0	0	0	0	0	0	0	0	0	0	0	0	2	0	0	0	0	0	0	0	0	0	0	0	1	0	0	0	0	0	0	0
SPAPB2B4.05.1:exon:1-SPAPB2B4.05.1:exon:7	SPAPB2B4.05.1:exon:2;SPAPB2B4.05.1:exon:3;SPAPB2B4.05.1:exon:4;SPAPB2B4.05.1:exon:5;SPAPB2B4.05.1:exon:6	834	5	0	0	0	0	0	0	0	0	0	0	0	0	0	0	0	0	0	0	0	0	0	0	0	0	0	0	0	0	0	0	0	0	0	0	0	0	0	0	0	0	0	0	0	0	0	0
SPAPB2B4.05.1:exon:3-SPAPB2B4.05.1:exon:5	SPAPB2B4.05.1:exon:4	92	1	0	0	0	0	0	0	0	0	0	0	0	0	0	0	0	0	0	0	0	0	0	0	0	0	0	0	0	0	0	0	0	0	0	0	0	0	0	0	0	0	0	0	0	0	0	0
SPAPB2B4.05.1:exon:4-SPAPB2B4.05.1:exon:6	SPAPB2B4.05.1:exon:5	261	1	0	0	0	0	0	0	0	0	0	0	0	0	0	0	0	0	0	0	0	0	0	0	0	0	0	0	0	0	0	0	0	0	0	0	0	0	0	0	0	0	0	0	0	0	0	0
SPAC6F6.15.1:exon:2-SPAC6F6.15.1:exon:5	SPAC6F6.15.1:exon:3;SPAC6F6.15.1:exon:4	85	2	0	0	0	0	0	0	0	0	0	0	0	0	0	0	0	0	0	0	0	0	0	0	0	0	0	0	0	0	0	0	0	0	0	0	0	0	0	0	0	0	0	0	0	0	0	0
SPAC6F6.15.1:exon:3-SPAC6F6.15.1:exon:5	SPAC6F6.15.1:exon:4	61	1	0	0	0	0	0	0	0	0	0	0	0	0	0	0	0	0	0	1	0	0	0	0	0	1	0	0	0	0	0	0	0	0	0	0	0	0	0	1	0	0	0	0	0	0	0	0
SPAC6F6.15.1:exon:6-SPAC6F6.15.1:exon:8	SPAC6F6.15.1:exon:7	126	1	0	0	0	0	0	0	0	0	0	0	0	0	0	0	0	0	1	0	0	0	0	0	0	0	0	0	0	0	0	0	0	0	0	0	0	0	0	0	0	0	0	0	0	0	1	0
SPAC1B2.05.1:exon:1-SPAC1B2.05.1:exon:3	SPAC1B2.05.1:exon:2	373	1	0	0	0	0	0	0	0	0	0	1	0	0	0	0	0	0	0	0	0	0	0	0	0	0	0	0	0	0	0	0	0	0	0	0	0	0	0	0	2	1	1	0	0	0	0	0
SPAC8F11.02c.1:exon:2-SPAC8F11.02c.1:three_prime_UTR:1	SPAC8F11.02c.1:exon:1	288	1	0	0	0	0	0	0	0	0	0	0	0	0	0	0	0	0	0	0	0	0	0	0	0	0	0	0	0	0	0	0	0	0	0	0	0	0	0	0	0	0	0	0	0	0	0	0
SPAC8F11.07c.1:exon:6-SPAC8F11.07c.1:exon:4	SPAC8F11.07c.1:exon:5	28	1	0	0	0	0	0	0	0	0	0	0	0	0	1	2	0	0	0	0	0	0	0	0	0	0	0	0	0	0	1	0	0	0	0	0	0	0	0	0	0	0	1	0	0	0	0	0
SPACUNK4.10.1:exon:3-SPACUNK4.10.1:exon:1	SPACUNK4.10.1:exon:2	866	1	0	0	0	0	0	0	0	0	0	0	0	0	0	0	0	0	0	0	0	0	0	0	0	0	0	0	0	0	0	0	0	0	0	0	0	0	0	0	0	0	1	0	0	0	0	0
SPAC24C9.11.1:exon:1-SPAC24C9.11.1:exon:3	SPAC24C9.11.1:exon:2	1664	1	0	0	0	0	0	0	0	0	0	0	0	0	0	0	0	0	0	0	0	0	0	0	0	0	0	0	0	0	0	0	0	0	0	0	0	0	0	0	0	0	0	0	0	0	0	0
SPAC16A10.04.1:exon:2-SPAC16A10.04.1:exon:4	SPAC16A10.04.1:exon:3	47	1	0	0	0	0	0	0	0	0	0	0	0	0	0	0	0	0	0	0	0	0	0	0	0	0	0	0	0	0	0	0	0	0	0	0	1	0	0	0	0	0	0	0	0	0	0	0
SPAC16A10.04.1:exon:2-SPAC16A10.04.1:exon:5	SPAC16A10.04.1:exon:3;SPAC16A10.04.1:exon:4	251	2	0	0	0	0	0	0	0	0	0	0	0	0	0	0	0	0	0	0	0	0	0	0	0	0	0	0	0	0	0	0	0	0	0	0	0	0	0	0	0	0	0	0	0	0	0	0
SPAC16A10.04.1:exon:3-SPAC16A10.04.1:exon:6	SPAC16A10.04.1:exon:4;SPAC16A10.04.1:exon:5	339	2	0	0	0	0	0	0	0	0	0	0	0	0	0	0	0	0	0	0	0	0	0	0	0	0	0	0	0	0	0	0	0	0	0	0	0	0	0	0	0	0	0	0	0	0	0	0
SPAC3G9.06.1:exon:3-SPAC3G9.06.1:exon:1	SPAC3G9.06.1:exon:2	90	1	0	0	0	0	0	0	0	0	0	0	0	0	1	0	0	0	0	0	0	0	0	0	0	0	0	0	0	0	0	0	0	0	0	0	0	0	0	0	0	0	0	0	0	0	0	0
SPAC16E8.11c.1:exon:6-SPAC16E8.11c.1:exon:1	SPAC16E8.11c.1:exon:5;SPAC16E8.11c.1:exon:4;SPAC16E8.11c.1:exon:3;SPAC16E8.11c.1:exon:2	1478	4	0	0	0	0	0	0	0	0	0	1	0	0	0	0	0	0	0	0	0	0	0	0	0	0	0	0	0	0	0	0	0	0	0	0	0	0	0	0	0	0	0	0	0	0	0	0
SPAC17G6.12.1:exon:1-SPAC17G6.12.1:exon:5	SPAC17G6.12.1:exon:2;SPAC17G6.12.1:exon:3;SPAC17G6.12.1:exon:4	229	3	0	0	0	0	0	0	0	0	0	0	0	0	0	0	0	0	0	0	0	0	0	0	0	0	0	0	0	0	0	0	0	0	0	0	0	0	0	0	0	0	0	0	0	0	0	0
SPAC17G6.12.1:exon:3-SPAC17G6.12.1:exon:5	SPAC17G6.12.1:exon:4	77	1	0	0	0	0	0	0	0	0	0	0	0	0	0	0	0	0	0	1	0	0	0	0	0	0	0	0	0	0	0	0	0	0	0	0	0	0	0	0	0	0	0	0	0	0	0	0
SPAC17G6.15c.1:exon:6-SPAC17G6.15c.1:exon:4	SPAC17G6.15c.1:exon:5	26	1	0	0	0	0	0	0	0	0	0	0	0	0	0	0	0	0	0	0	0	0	0	0	0	0	0	0	0	0	0	0	0	0	0	0	0	0	0	0	0	0	0	0	0	0	0	0
SPAC17G6.15c.1:exon:4-SPAC17G6.15c.1:exon:2	SPAC17G6.15c.1:exon:3	74	1	0	0	0	0	0	0	0	0	0	0	0	0	0	0	0	0	0	0	0	0	0	0	0	0	0	0	0	0	0	0	0	0	0	0	0	0	0	0	0	0	0	0	0	0	0	0
SPAC8C9.05.1:exon:1-SPAC8C9.05.1:exon:5	SPAC8C9.05.1:exon:2;SPAC8C9.05.1:exon:3;SPAC8C9.05.1:exon:4	183	3	0	0	0	0	0	0	0	0	0	0	0	0	0	0	0	0	0	0	0	0	0	0	0	0	0	0	0	0	0	0	0	0	0	0	0	0	0	0	0	0	0	0	0	0	0	0
SPAC8C9.05.1:exon:2-SPAC8C9.05.1:exon:4	SPAC8C9.05.1:exon:3	29	1	0	0	0	0	0	0	0	0	0	0	0	0	1	0	0	0	0	0	0	0	0	0	0	0	0	0	0	0	0	0	0	0	0	0	0	0	0	0	0	0	0	0	0	0	0	0
SPAC8C9.10c.1:exon:3-SPAC8C9.10c.1:exon:1	SPAC8C9.10c.1:exon:2	84	1	0	0	0	0	0	0	0	0	0	0	0	0	0	0	0	0	0	0	0	0	0	0	0	0	0	0	0	1	0	0	0	0	0	1	0	0	0	0	0	1	0	0	0	0	0	0
SPAC15A10.10.1:exon:4-SPAC15A10.10.1:exon:6	SPAC15A10.10.1:exon:5	180	1	0	0	0	0	0	0	0	0	0	0	0	0	0	0	0	0	0	0	0	0	0	0	0	0	0	0	0	0	0	0	0	0	0	0	0	0	0	0	0	1	0	0	0	0	0	0
SPAC1556.04c.1:exon:4-SPAC1556.04c.1:exon:1	SPAC1556.04c.1:exon:3;SPAC1556.04c.1:exon:2	162	2	0	0	0	0	0	0	0	0	0	0	0	0	0	0	0	0	0	0	0	0	0	0	0	0	0	0	0	0	0	0	0	0	0	0	0	0	0	0	0	0	0	0	0	0	0	0
SPAC1F12.08.1:five_prime_UTR:1-SPAC1F12.08.1:exon:2	SPAC1F12.08.1:exon:1	610	1	0	0	0	0	0	0	0	0	0	0	0	0	0	0	0	0	0	0	0	0	0	0	0	0	0	0	0	0	0	0	0	0	0	0	0	0	0	0	0	0	0	0	0	0	0	0
SPAC1F12.08.1:exon:1-SPAC1F12.08.1:exon:3	SPAC1F12.08.1:exon:2	141	1	0	0	0	0	0	0	0	0	0	0	0	0	1	0	0	0	0	0	0	0	0	0	0	0	0	0	0	0	0	0	0	0	1	0	0	0	0	0	0	0	0	0	0	0	0	0
SPAC4H3.07c.1:exon:3-SPAC4H3.07c.1:exon:1	SPAC4H3.07c.1:exon:2	220	1	0	0	0	0	0	0	0	0	0	0	0	0	0	0	0	0	0	0	0	0	0	0	0	0	0	0	0	0	0	0	0	0	0	0	0	0	0	0	0	0	0	0	0	0	0	0
SPAC323.06c.1:exon:7-SPAC323.06c.1:exon:3	SPAC323.06c.1:exon:6;SPAC323.06c.1:exon:5;SPAC323.06c.1:exon:4	684	3	0	0	0	0	0	0	0	0	0	0	0	0	0	0	0	0	1	0	0	0	0	0	0	0	0	0	0	0	0	0	0	0	0	0	0	0	0	1	0	0	0	0	0	0	0	0
SPAC2F3.15.1:exon:1-SPAC2F3.15.1:exon:4	SPAC2F3.15.1:exon:2;SPAC2F3.15.1:exon:3	770	2	0	0	0	0	0	0	0	0	0	0	0	0	0	0	0	0	0	0	0	0	0	0	0	0	0	0	0	0	0	0	0	0	0	0	0	0	0	0	0	1	0	0	0	0	1	0
SPAPB18E9.01.1:exon:2-SPAPB18E9.01.1:exon:4	SPAPB18E9.01.1:exon:3	102	1	0	0	0	0	0	0	0	0	0	0	0	0	0	0	0	0	0	0	0	0	0	0	0	0	0	0	0	0	0	0	0	0	0	0	0	0	0	0	0	0	0	0	0	0	0	0
SPAC19G12.01c.1:exon:5-SPAC19G12.01c.1:exon:2	SPAC19G12.01c.1:exon:4;SPAC19G12.01c.1:exon:3	343	2	0	0	0	0	0	0	0	0	0	0	0	0	0	0	0	0	0	0	0	0	0	0	0	0	0	0	0	0	0	0	0	0	0	0	0	0	0	0	0	0	0	0	0	0	0	0
SPAC19G12.17.1:exon:6-SPAC19G12.17.1:exon:1	SPAC19G12.17.1:exon:5;SPAC19G12.17.1:exon:4;SPAC19G12.17.1:exon:3;SPAC19G12.17.1:exon:2	215	4	0	0	0	0	0	0	0	0	0	0	0	0	0	0	0	0	0	0	0	0	0	0	0	0	0	0	0	0	0	0	0	0	0	0	0	0	0	0	0	0	0	0	0	0	0	0
SPAC26H5.03.1:exon:1-SPAC26H5.03.1:exon:4	SPAC26H5.03.1:exon:2;SPAC26H5.03.1:exon:3	346	2	0	0	0	0	0	0	0	0	0	0	0	0	0	0	0	0	0	0	0	0	0	0	0	0	0	0	0	0	0	0	0	0	0	0	0	0	0	0	0	0	0	0	0	0	0	0
SPAC23D3.17.1:exon:3-SPAC23D3.17.1:exon:1	SPAC23D3.17.1:exon:2	83	1	0	0	0	0	0	0	0	0	0	0	0	0	0	0	0	0	0	0	0	0	0	0	0	0	0	0	0	0	0	0	0	0	0	0	0	0	0	0	0	0	0	0	0	0	0	0
SPAC30.03c.1:exon:6-SPAC30.03c.1:exon:4	SPAC30.03c.1:exon:5	76	1	0	0	0	0	0	0	0	0	0	0	1	1	1	0	0	0	0	0	0	0	0	0	0	0	0	0	0	0	0	0	0	0	0	0	0	0	0	0	0	2	1	0	0	0	0	0
SPAC30.03c.1:exon:4-SPAC30.03c.1:exon:1	SPAC30.03c.1:exon:3;SPAC30.03c.1:exon:2	252	2	0	0	0	0	0	0	0	0	0	0	0	0	0	0	0	0	0	1	0	0	0	0	0	0	0	0	0	0	0	0	0	0	0	0	0	0	0	0	0	0	0	0	0	0	0	0
SPAC30.03c.1:exon:3-SPAC30.03c.1:exon:1	SPAC30.03c.1:exon:2	169	1	0	0	0	0	0	0	0	0	0	0	0	0	0	0	0	0	0	0	0	0	0	0	0	0	0	0	0	0	0	0	0	0	0	0	0	0	0	0	0	1	0	0	0	0	0	0
SPAC16.01.1:exon:4-SPAC16.01.1:exon:6	SPAC16.01.1:exon:5	41	1	0	0	0	0	0	0	0	0	0	1	0	0	0	0	0	0	0	0	0	0	0	0	0	0	0	0	0	0	0	0	0	0	0	0	0	0	0	0	0	0	0	0	0	0	0	0
SPAC16.01.1:exon:7-SPAC16.01.1:exon:9	SPAC16.01.1:exon:8	135	1	0	0	0	0	0	0	0	0	0	0	0	0	0	0	0	0	0	0	0	0	0	0	0	0	0	0	0	0	0	0	0	0	0	0	0	0	0	0	0	0	1	0	0	0	0	0
SPAC12B10.05.1:exon:1-SPAC12B10.05.1:exon:4	SPAC12B10.05.1:exon:2;SPAC12B10.05.1:exon:3	124	2	0	0	0	0	0	0	0	0	0	0	0	0	0	0	0	0	0	0	0	0	0	0	0	0	0	0	0	0	0	0	0	0	0	0	0	0	0	0	0	0	0	0	0	0	0	0
SPAC12B10.05.1:exon:1-SPAC12B10.05.1:exon:7	SPAC12B10.05.1:exon:2;SPAC12B10.05.1:exon:3;SPAC12B10.05.1:exon:4;SPAC12B10.05.1:exon:5;SPAC12B10.05.1:exon:6	198	5	0	0	0	0	0	0	0	0	0	1	0	0	0	0	0	0	0	0	0	0	0	0	0	0	0	0	0	0	0	0	0	0	0	0	0	0	0	0	0	0	0	0	0	0	0	0
SPAC12B10.05.1:exon:1-SPAC12B10.05.1:exon:9	SPAC12B10.05.1:exon:2;SPAC12B10.05.1:exon:3;SPAC12B10.05.1:exon:4;SPAC12B10.05.1:exon:5;SPAC12B10.05.1:exon:6;SPAC12B10.05.1:exon:7;SPAC12B10.05.1:exon:8	710	7	0	0	0	0	0	0	0	0	0	0	0	0	0	0	0	0	1	0	0	0	0	0	0	0	0	0	0	0	0	0	0	0	0	0	0	0	0	0	0	0	0	0	0	0	1	2
SPAC12B10.05.1:exon:2-SPAC12B10.05.1:exon:9	SPAC12B10.05.1:exon:3;SPAC12B10.05.1:exon:4;SPAC12B10.05.1:exon:5;SPAC12B10.05.1:exon:6;SPAC12B10.05.1:exon:7;SPAC12B10.05.1:exon:8	607	6	0	0	0	0	0	0	0	0	0	0	0	0	0	0	0	0	0	0	0	0	0	0	0	0	0	0	0	0	0	0	0	0	0	0	0	0	0	0	1	0	0	0	0	0	1	0
SPAC12B10.05.1:exon:6-SPAC12B10.05.1:exon:8	SPAC12B10.05.1:exon:7	128	1	0	0	0	0	0	0	0	0	0	0	0	0	0	0	0	0	0	0	0	0	0	0	0	0	0	0	0	0	0	0	0	0	0	0	0	0	0	0	0	0	0	0	0	0	0	0
SPAC12B10.05.1:exon:8-SPAC12B10.05.1:exon:10	SPAC12B10.05.1:exon:9	78	1	0	0	0	0	0	0	0	0	0	0	1	0	0	0	0	0	0	0	0	0	0	0	0	0	0	0	0	0	0	0	0	0	0	0	0	0	0	2	0	0	0	0	0	0	0	0
SPAC12B10.05.1:exon:8-SPAC12B10.05.1:exon:11	SPAC12B10.05.1:exon:9;SPAC12B10.05.1:exon:10	300	2	0	0	0	0	0	0	0	0	0	0	0	0	0	1	0	0	0	0	0	0	0	0	0	0	0	0	0	0	0	0	0	0	0	0	0	0	0	0	0	0	0	0	0	0	0	0
SPAC12B10.05.1:exon:10-SPAC12B10.05.1:exon:12	SPAC12B10.05.1:exon:11	108	1	0	0	0	0	0	0	0	0	0	0	0	0	0	0	0	0	0	0	0	0	0	0	0	0	0	0	0	0	0	0	0	0	0	0	0	0	0	0	0	0	0	0	0	0	0	0
SPAC12B10.07.1:exon:1-SPAC12B10.07.1:exon:3	SPAC12B10.07.1:exon:2	194	1	0	0	0	0	0	0	0	0	0	0	0	0	0	0	0	0	0	0	0	0	0	0	0	0	0	0	0	0	0	0	0	0	0	0	0	0	0	0	0	0	0	0	0	0	0	0
SPAC1093.03.1:exon:2-SPAC1093.03.1:exon:4	SPAC1093.03.1:exon:3	227	1	0	0	0	0	0	0	0	0	0	0	0	0	1	0	0	0	0	0	0	0	0	0	0	0	0	0	0	0	0	0	0	0	0	0	0	0	0	0	0	0	1	0	0	0	0	0
SPAC144.05.1:exon:2-SPAC144.05.1:exon:5	SPAC144.05.1:exon:3;SPAC144.05.1:exon:4	241	2	0	0	0	0	0	0	0	0	0	0	0	0	0	0	0	0	0	0	0	0	0	0	0	0	0	0	0	0	0	0	0	0	0	0	0	0	0	0	0	0	1	0	0	0	0	0
SPAC458.04c.1:exon:4-SPAC458.04c.1:exon:2	SPAC458.04c.1:exon:3	225	1	0	0	0	0	0	0	0	0	0	0	0	0	0	0	0	0	0	0	0	0	0	0	0	0	0	0	0	0	0	0	0	0	0	0	0	0	0	0	0	0	0	0	0	0	0	0
SPAC458.07.1:exon:1-SPAC458.07.1:exon:3	SPAC458.07.1:exon:2	96	1	0	0	0	0	0	0	0	0	0	0	0	0	0	0	0	0	0	0	0	0	0	0	0	0	0	0	0	0	0	0	0	0	0	0	0	0	0	0	0	0	0	0	0	0	0	0
SPAC20G4.01.1:exon:1-SPAC20G4.01.1:exon:3	SPAC20G4.01.1:exon:2	120	1	0	0	0	0	0	0	0	0	0	0	0	0	0	0	0	0	0	0	0	0	0	0	0	0	0	0	0	0	0	0	0	0	0	0	0	0	0	0	0	2	1	0	0	0	0	0
SPAC4F10.15c.1:exon:3-SPAC4F10.15c.1:exon:1	SPAC4F10.15c.1:exon:2	133	1	0	0	0	0	0	0	0	0	0	0	0	0	0	0	0	0	0	0	0	0	0	0	0	0	0	0	0	0	0	0	0	0	0	0	0	0	0	0	0	0	0	0	0	0	0	0
SPAC1B3.02c.1:exon:4-SPAC1B3.02c.1:exon:2	SPAC1B3.02c.1:exon:3	47	1	0	0	0	0	0	0	0	0	0	2	0	0	0	0	0	0	0	0	0	0	0	0	0	0	0	0	0	0	0	0	0	0	0	0	0	0	0	0	0	0	0	0	0	0	1	0
SPAC1B3.05.1:exon:1-SPAC1B3.05.1:exon:4	SPAC1B3.05.1:exon:2;SPAC1B3.05.1:exon:3	233	2	0	0	0	0	0	0	0	0	0	0	0	0	0	0	0	0	0	0	0	0	0	0	0	0	0	0	0	0	0	0	0	0	0	0	0	0	0	0	0	0	0	0	0	0	0	0
SPAC1006.03c.1:exon:4-SPAC1006.03c.1:exon:1	SPAC1006.03c.1:exon:3;SPAC1006.03c.1:exon:2	1788	2	0	0	0	0	0	0	0	0	0	0	0	0	0	0	0	0	0	0	0	0	0	0	0	0	0	0	0	0	0	0	0	0	0	0	0	0	0	0	0	0	0	0	0	0	0	0
SPAC1006.06.1:exon:1-SPAC1006.06.1:exon:3	SPAC1006.06.1:exon:2	422	1	0	0	0	0	0	0	0	0	0	0	0	0	0	0	0	0	0	0	0	0	0	0	0	0	0	0	0	0	0	0	0	0	0	0	1	0	0	0	0	0	0	0	0	0	0	0
SPAC11E3.04c.1:exon:4-SPAC11E3.04c.1:exon:1	SPAC11E3.04c.1:exon:3;SPAC11E3.04c.1:exon:2	247	2	0	0	0	0	0	0	0	0	0	1	0	0	0	0	0	0	0	0	0	0	0	0	0	0	0	0	0	0	0	0	0	0	0	0	0	0	0	0	0	0	0	0	0	0	0	0
SPAC11E3.06.1:exon:1-SPAC11E3.06.1:exon:3	SPAC11E3.06.1:exon:2	169	1	0	0	0	0	0	0	0	0	0	0	0	0	0	0	0	0	0	0	0	0	0	0	0	0	0	0	0	0	0	0	0	0	0	0	0	0	0	0	0	0	0	0	0	0	0	0
SPAC3G6.05.1:exon:1-SPAC3G6.05.1:exon:4	SPAC3G6.05.1:exon:2;SPAC3G6.05.1:exon:3	170	2	0	0	0	0	0	0	0	0	0	0	0	0	0	0	0	0	0	0	0	0	0	0	0	0	0	0	0	0	0	0	0	0	0	0	0	0	0	0	0	0	0	0	0	0	0	0
SPBC106.16.1:exon:1-SPBC106.16.1:exon:3	SPBC106.16.1:exon:2	374	1	0	0	0	0	0	0	0	0	0	0	0	0	0	0	0	0	0	0	0	0	0	0	0	0	0	0	0	0	0	0	0	0	0	0	0	0	0	0	0	0	2	0	0	0	0	0
SPBC106.20.1:exon:2-SPBC106.20.1:exon:4	SPBC106.20.1:exon:3	159	1	0	0	0	0	0	0	0	0	0	0	0	0	0	0	0	0	0	0	0	0	0	0	0	0	0	0	0	0	0	0	0	0	0	0	0	0	0	0	0	0	0	0	0	0	0	0
SPBC428.01c.1:exon:7-SPBC428.01c.1:exon:4	SPBC428.01c.1:exon:6;SPBC428.01c.1:exon:5	82	2	0	0	0	0	0	0	0	0	0	0	0	0	0	0	0	0	0	0	0	0	0	0	0	0	0	0	0	0	0	0	0	0	0	0	0	0	0	0	0	0	0	0	0	0	0	0
SPBC428.01c.1:exon:6-SPBC428.01c.1:exon:4	SPBC428.01c.1:exon:5	34	1	0	0	0	0	0	0	0	0	0	0	0	0	0	0	0	0	0	0	0	0	0	0	0	0	0	0	0	0	0	0	0	0	0	0	0	0	0	0	0	0	0	0	0	0	0	0
SPBC428.01c.1:exon:3-SPBC428.01c.1:exon:1	SPBC428.01c.1:exon:2	109	1	0	0	0	0	0	0	0	0	0	0	0	1	0	0	0	0	0	0	0	0	0	0	0	0	0	0	0	0	0	0	0	0	0	0	0	0	0	0	0	0	0	0	0	0	0	0
SPBC428.06c.1:exon:3-SPBC428.06c.1:exon:1	SPBC428.06c.1:exon:2	109	1	0	0	0	0	0	0	0	0	0	0	0	0	0	0	0	0	0	0	0	0	0	0	0	0	0	0	0	0	0	0	0	0	0	0	0	0	0	0	0	0	0	0	0	0	0	0
SPBC1685.16.1:exon:1-SPBC1685.16.1:three_prime_UTR:2	SPBC1685.16.1:exon:2;SPBC1685.16.1:exon:3	144	2	0	0	0	0	0	0	0	0	0	0	0	0	0	0	0	0	0	0	0	0	0	0	0	0	0	0	0	0	0	0	0	0	0	0	0	0	0	0	0	0	0	0	0	0	0	0
SPBC1685.14c.1:exon:3-SPBC1685.14c.1:exon:1	SPBC1685.14c.1:exon:2	93	1	0	0	0	0	0	0	0	0	0	0	0	0	0	0	0	0	0	0	0	0	0	0	0	0	0	0	0	0	0	0	0	0	0	0	0	0	0	0	0	0	0	0	0	0	0	0
SPBC839.16.1:exon:1-SPBC839.16.1:exon:3	SPBC839.16.1:exon:2	145	1	0	0	0	0	0	0	0	0	0	1	0	0	0	0	0	0	0	0	0	0	0	0	0	0	0	0	0	0	0	0	0	0	0	0	0	0	0	0	0	0	0	0	0	0	0	0
SPBC839.17c.1:exon:5-SPBC839.17c.1:exon:3	SPBC839.17c.1:exon:4	38	1	0	0	0	0	0	0	0	0	0	0	0	0	0	0	0	0	0	0	0	0	0	0	0	0	0	0	0	0	0	0	0	0	0	0	0	0	0	0	0	0	0	0	0	0	0	0
SPBC947.01.1:exon:3-SPBC947.01.1:exon:1	SPBC947.01.1:exon:2	409	1	0	0	0	0	0	0	0	0	0	0	1	0	0	0	0	0	0	0	0	0	0	0	0	0	0	0	0	0	0	0	0	0	0	0	0	0	0	0	0	0	0	0	0	0	0	0
SPBC119.14.1:exon:2-SPBC119.14.1:exon:5	SPBC119.14.1:exon:3;SPBC119.14.1:exon:4	433	2	0	0	0	0	0	0	0	0	0	0	0	0	0	0	0	0	0	0	0	0	0	0	0	0	0	0	0	0	0	0	0	0	0	0	0	0	0	0	0	0	0	0	0	0	0	0
SPBC577.06c.1:exon:3-SPBC577.06c.1:exon:1	SPBC577.06c.1:exon:2	1021	1	0	0	0	0	0	0	0	0	0	0	1	1	0	0	0	0	0	0	0	0	0	0	0	0	0	0	0	0	0	0	0	0	0	0	0	0	0	0	0	1	0	0	0	0	0	0
SPBC577.11.1:exon:1-SPBC577.11.1:exon:3	SPBC577.11.1:exon:2	100	1	0	0	0	0	0	0	0	0	0	0	0	0	1	0	0	0	0	2	0	0	0	0	0	0	0	0	0	0	0	0	0	0	0	0	0	0	0	0	0	0	0	0	0	0	0	0
SPBC36.05c.1:exon:14-SPBC36.05c.1:exon:7	SPBC36.05c.1:exon:13;SPBC36.05c.1:exon:12;SPBC36.05c.1:exon:11;SPBC36.05c.1:exon:10;SPBC36.05c.1:exon:9;SPBC36.05c.1:exon:8	352	6	0	0	0	0	0	0	0	0	0	0	1	0	0	0	0	0	0	0	0	0	0	0	0	0	0	0	0	0	0	0	0	0	0	0	0	0	0	0	0	0	0	0	0	0	0	0
SPBC36.05c.1:exon:14-SPBC36.05c.1:exon:1	SPBC36.05c.1:exon:13;SPBC36.05c.1:exon:12;SPBC36.05c.1:exon:11;SPBC36.05c.1:exon:10;SPBC36.05c.1:exon:9;SPBC36.05c.1:exon:8;SPBC36.05c.1:exon:7;SPBC36.05c.1:exon:6;SPBC36.05c.1:exon:5;SPBC36.05c.1:exon:4;SPBC36.05c.1:exon:3;SPBC36.05c.1:exon:2	1098	12	0	0	0	0	0	0	0	0	0	0	0	1	0	0	0	0	0	0	0	0	0	0	0	0	0	0	0	0	0	0	0	0	0	0	0	0	0	0	0	0	0	0	0	0	0	0
SPBC36.05c.1:exon:13-SPBC36.05c.1:exon:11	SPBC36.05c.1:exon:12	51	1	0	0	0	0	0	0	0	0	0	0	0	0	0	0	0	0	0	0	0	0	0	0	0	0	0	0	0	0	0	0	0	0	0	0	0	0	0	0	0	0	0	0	0	0	0	0
SPBC36.05c.1:exon:8-SPBC36.05c.1:exon:4	SPBC36.05c.1:exon:7;SPBC36.05c.1:exon:6;SPBC36.05c.1:exon:5	437	3	0	0	0	0	0	0	0	0	0	0	0	0	0	0	0	0	0	0	0	0	0	0	0	0	0	0	0	0	0	0	0	0	0	0	0	0	0	0	0	0	0	0	0	0	0	0
SPBC36.05c.1:exon:7-SPBC36.05c.1:exon:5	SPBC36.05c.1:exon:6	93	1	0	0	0	0	0	0	0	0	0	0	1	0	0	0	0	0	0	0	0	0	0	0	0	0	0	0	0	0	0	0	0	0	0	0	0	0	0	0	0	0	0	0	0	0	0	0
SPBC646.04.1:exon:2-SPBC646.04.1:exon:4	SPBC646.04.1:exon:3	94	1	0	0	0	0	0	0	0	0	0	0	0	0	0	0	0	0	0	0	0	0	0	0	0	0	0	0	0	0	0	0	0	0	0	0	0	0	0	0	0	0	0	0	0	0	0	0
SPBC646.15c.1:exon:5-SPBC646.15c.1:exon:2	SPBC646.15c.1:exon:4;SPBC646.15c.1:exon:3	823	2	0	0	0	0	0	0	0	0	0	0	0	0	0	0	0	0	0	0	0	0	0	0	0	0	0	0	0	0	0	0	0	0	0	0	0	0	0	0	0	0	0	0	0	0	0	0
SPBP35G2.08c.1:exon:3-SPBP35G2.08c.1:exon:1	SPBP35G2.08c.1:exon:2	102	1	0	0	0	0	0	0	0	0	0	0	0	0	0	0	0	0	0	0	0	0	0	0	0	0	0	0	0	0	0	0	0	0	0	0	1	0	0	1	1	0	0	0	0	0	0	0
SPBC337.03.1:exon:2-SPBC337.03.1:exon:4	SPBC337.03.1:exon:3	195	1	0	0	0	0	0	0	0	0	0	0	0	0	0	0	0	0	0	0	0	0	0	0	0	0	0	0	0	0	0	0	0	0	0	0	0	0	0	0	0	0	0	0	0	0	0	0
SPBC1709.04c.1:exon:3-SPBC1709.04c.1:exon:1	SPBC1709.04c.1:exon:2	68	1	0	0	0	0	0	0	0	0	0	0	0	0	0	0	0	0	0	0	0	0	0	0	0	0	0	0	0	0	0	0	0	0	0	0	0	0	0	0	0	1	0	0	0	0	0	0
SPBC409.05.1:exon:1-SPBC409.05.1:exon:4	SPBC409.05.1:exon:2;SPBC409.05.1:exon:3	416	2	0	0	0	0	0	0	0	0	0	0	0	0	0	0	0	0	0	0	0	0	0	0	0	0	0	0	0	0	0	0	0	0	0	0	0	0	0	0	0	0	0	0	0	0	0	0
SPBC409.05.1:exon:2-SPBC409.05.1:exon:4	SPBC409.05.1:exon:3	368	1	0	0	0	0	0	0	0	0	0	0	0	0	0	0	0	0	0	0	0	0	0	0	0	0	0	0	0	0	0	0	0	0	0	0	0	0	0	0	0	0	0	0	0	0	0	0
SPBC725.08.1:exon:1-SPBC725.08.1:exon:4	SPBC725.08.1:exon:2;SPBC725.08.1:exon:3	139	2	0	0	0	0	0	0	0	0	0	0	1	0	0	0	0	0	0	0	0	0	0	0	0	0	0	0	0	0	0	0	0	0	0	0	0	0	0	0	0	0	0	0	0	0	0	0
SPBC651.11c.1:exon:3-SPBC651.11c.1:exon:1	SPBC651.11c.1:exon:2	420	1	0	0	0	0	0	0	0	0	0	1	0	0	0	0	0	0	0	0	0	0	0	0	0	0	0	0	0	0	0	0	0	0	0	0	0	0	0	0	0	0	0	0	0	0	0	0
SPBC27B12.05.1:exon:2-SPBC27B12.05.1:exon:6	SPBC27B12.05.1:exon:3;SPBC27B12.05.1:exon:4;SPBC27B12.05.1:exon:5	553	3	0	0	0	0	0	0	0	0	0	1	0	0	0	0	0	0	0	0	0	0	0	0	0	0	0	0	0	0	0	0	0	0	0	0	0	0	0	0	0	0	0	0	0	0	0	0
SPBC27B12.05.1:exon:2-SPBC27B12.05.1:exon:7	SPBC27B12.05.1:exon:3;SPBC27B12.05.1:exon:4;SPBC27B12.05.1:exon:5;SPBC27B12.05.1:exon:6	773	4	0	0	0	0	0	0	0	0	0	1	0	0	0	0	0	0	0	0	0	0	0	0	0	0	0	0	0	0	0	0	0	0	0	0	0	0	0	0	0	0	0	0	0	0	0	0
SPBC8D2.13.1:exon:1-SPBC8D2.13.1:exon:3	SPBC8D2.13.1:exon:2	68	1	0	0	0	0	0	0	0	0	0	0	0	0	0	0	0	0	0	0	0	0	0	0	0	0	0	0	0	0	0	0	0	0	0	0	0	0	0	0	0	0	0	0	0	0	0	0
SPBC8D2.13.1:exon:3-SPBC8D2.13.1:exon:5	SPBC8D2.13.1:exon:4	737	1	0	0	0	0	0	0	0	0	0	0	0	0	0	0	0	0	0	0	0	0	0	0	0	0	0	0	0	0	0	0	0	0	0	0	0	0	0	0	0	0	0	0	0	0	0	0
SPBC17A3.08.1:exon:2-SPBC17A3.08.1:exon:4	SPBC17A3.08.1:exon:3	199	1	0	0	0	0	0	0	0	0	0	0	0	0	0	0	0	0	0	0	0	0	0	0	0	0	0	0	0	0	0	0	0	0	0	0	0	0	0	0	0	2	0	0	0	0	0	0
SPBC691.01.1:exon:1-SPBC691.01.1:exon:4	SPBC691.01.1:exon:2;SPBC691.01.1:exon:3	147	2	0	0	0	0	0	0	0	0	0	0	0	0	0	0	0	0	0	0	0	0	0	0	0	0	0	0	0	0	0	0	0	0	0	0	0	0	0	0	0	0	0	0	0	0	0	1
SPBC32H8.10.1:exon:1-SPBC32H8.10.1:exon:3	SPBC32H8.10.1:exon:2	82	1	0	0	0	0	0	0	0	0	0	0	0	0	0	0	0	0	0	0	0	0	0	0	0	0	0	0	0	1	0	0	0	0	0	0	0	0	0	0	0	0	0	0	0	0	0	0
SPBC28F2.12.1:exon:1-SPBC28F2.12.1:exon:4	SPBC28F2.12.1:exon:2;SPBC28F2.12.1:exon:3	99	2	0	0	0	0	0	0	0	0	0	0	0	0	0	0	0	0	0	0	0	0	0	0	0	0	0	0	0	0	0	0	0	0	0	0	0	0	0	0	0	0	0	0	0	0	0	0
SPBC28F2.12.1:exon:5-SPBC28F2.12.1:exon:7	SPBC28F2.12.1:exon:6	107	1	0	0	0	0	0	0	0	0	0	0	0	0	0	0	0	1	0	0	0	0	0	0	0	0	0	0	0	0	0	0	0	0	0	0	0	0	0	0	0	0	0	0	0	0	1	0
SPBC2F12.12c.1:exon:1-SPBC2F12.12c.1:exon:3	SPBC2F12.12c.1:exon:2	252	1	0	0	0	0	0	0	0	0	0	0	0	0	0	0	0	0	0	0	0	0	0	0	0	0	0	0	0	0	0	0	0	0	0	0	0	0	0	0	0	0	0	0	0	0	0	0
SPBC2F12.17.1:exon:3-SPBC2F12.17.1:exon:1	SPBC2F12.17.1:exon:2	93	1	0	0	0	0	0	0	0	0	0	0	1	0	0	0	0	0	0	0	0	0	0	0	0	0	0	0	1	0	0	0	1	6	0	0	0	1	0	0	0	0	0	0	0	0	0	1
SPBC16E9.02c.1:exon:3-SPBC16E9.02c.1:exon:1	SPBC16E9.02c.1:exon:2	70	1	0	0	0	0	0	0	0	0	0	0	0	0	1	1	0	0	0	0	0	0	0	0	0	0	0	0	0	0	0	0	0	0	0	0	0	0	0	0	0	0	0	0	0	0	0	0
SPBC16E9.15.1:exon:1-SPBC16E9.15.1:exon:4	SPBC16E9.15.1:exon:2;SPBC16E9.15.1:exon:3	67	2	0	0	0	0	0	0	0	0	0	0	0	0	0	0	0	0	0	0	0	0	0	0	0	0	0	0	0	0	0	0	0	0	0	0	0	0	0	0	0	0	0	0	0	0	0	0
SPBC1A4.06c.1:exon:4-SPBC1A4.06c.1:exon:2	SPBC1A4.06c.1:exon:3	279	1	0	0	0	0	0	0	0	0	0	0	0	0	0	0	0	0	0	0	0	0	0	0	0	0	0	0	0	0	0	0	0	0	0	0	0	0	0	0	0	0	0	0	0	0	0	0
SPBC29A3.14c.1:exon:16-SPBC29A3.14c.1:exon:10	SPBC29A3.14c.1:exon:15;SPBC29A3.14c.1:exon:14;SPBC29A3.14c.1:exon:13;SPBC29A3.14c.1:exon:12;SPBC29A3.14c.1:exon:11	927	5	0	0	0	0	0	0	0	0	0	0	0	0	0	0	0	0	0	0	0	0	0	0	0	0	0	0	0	0	0	0	0	0	0	0	0	0	0	0	0	0	0	0	0	0	0	0
SPBC29A3.14c.1:exon:12-SPBC29A3.14c.1:exon:9	SPBC29A3.14c.1:exon:11;SPBC29A3.14c.1:exon:10	341	2	0	0	0	0	0	0	0	0	0	0	0	0	0	0	0	0	0	0	0	0	0	0	0	0	0	0	0	0	0	0	0	0	0	0	0	0	0	0	0	0	0	0	0	0	0	0
SPBC29A3.14c.1:exon:9-SPBC29A3.14c.1:exon:4	SPBC29A3.14c.1:exon:8;SPBC29A3.14c.1:exon:7;SPBC29A3.14c.1:exon:6;SPBC29A3.14c.1:exon:5	718	4	0	0	0	0	0	0	0	0	0	0	0	0	0	0	0	0	0	0	0	0	0	0	0	0	0	0	0	0	0	0	0	0	0	0	0	0	0	0	0	0	0	0	0	0	0	0
SPBC29A3.14c.1:exon:7-SPBC29A3.14c.1:exon:5	SPBC29A3.14c.1:exon:6	149	1	0	0	0	0	0	0	0	0	0	0	0	0	1	1	0	0	0	0	0	0	0	0	0	0	0	0	0	0	0	0	0	0	0	0	0	0	0	0	1	0	0	0	0	0	0	0
SPBC1711.10c.1:exon:4-SPBC1711.10c.1:exon:2	SPBC1711.10c.1:exon:3	81	1	0	0	0	0	0	0	0	0	0	0	0	0	0	0	0	0	0	0	0	0	0	0	0	0	0	0	0	0	0	0	0	0	0	0	0	0	0	0	0	0	0	0	0	0	0	0
SPBC1711.10c.1:exon:3-SPBC1711.10c.1:exon:1	SPBC1711.10c.1:exon:2	1518	1	0	0	0	0	0	0	0	0	0	0	0	0	0	0	1	0	0	0	0	0	0	0	0	0	0	0	0	0	0	0	0	0	0	0	0	0	0	0	0	0	0	0	0	0	0	0
SPBC15C4.01c.1:exon:4-SPBC15C4.01c.1:exon:2	SPBC15C4.01c.1:exon:3	146	1	0	0	0	0	0	0	0	0	0	1	0	0	0	0	0	0	0	0	0	0	0	0	0	0	0	0	0	0	0	0	0	0	0	0	0	0	0	0	0	0	0	0	0	0	0	0
SPBC16H5.05c.1:five_prime_UTR:1-SPBC16H5.05c.1:exon:2	SPBC16H5.05c.1:exon:1	53	1	0	0	0	0	0	0	0	0	0	0	0	0	0	0	0	0	0	0	0	0	0	0	0	0	0	0	0	0	0	0	0	0	0	0	0	0	0	0	0	0	0	0	0	0	0	0
SPBC16H5.05c.1:exon:1-SPBC16H5.05c.1:exon:3	SPBC16H5.05c.1:exon:2	29	1	0	0	0	0	0	0	0	0	0	0	0	1	0	0	0	0	0	0	0	0	0	0	0	0	1	0	0	0	0	0	0	0	0	0	0	0	0	0	0	0	0	0	0	0	0	0
SPBC12D12.03.1:exon:1-SPBC12D12.03.1:exon:4	SPBC12D12.03.1:exon:2;SPBC12D12.03.1:exon:3	134	2	0	0	0	0	0	0	0	0	0	0	0	0	0	0	0	0	0	0	0	0	0	0	0	0	0	0	0	0	0	0	0	0	0	0	0	0	0	0	0	0	0	0	0	0	0	0
SPBC12D12.09.1:exon:1-SPBC12D12.09.1:exon:3	SPBC12D12.09.1:exon:2	27	1	0	0	0	0	0	0	0	0	0	0	0	0	0	0	0	0	0	0	0	0	0	0	0	0	0	0	0	0	0	0	0	0	0	0	0	0	0	0	0	0	0	0	0	0	0	0
SPBC12D12.09.1:exon:1-SPBC12D12.09.1:exon:5	SPBC12D12.09.1:exon:2;SPBC12D12.09.1:exon:3;SPBC12D12.09.1:exon:4	191	3	0	0	0	0	0	0	0	0	0	0	0	0	0	0	0	0	0	0	0	0	0	0	0	0	0	0	0	0	0	0	0	0	0	0	0	0	0	0	0	0	0	0	0	0	0	0
SPBC12D12.09.1:exon:1-SPBC12D12.09.1:exon:7	SPBC12D12.09.1:exon:2;SPBC12D12.09.1:exon:3;SPBC12D12.09.1:exon:4;SPBC12D12.09.1:exon:5;SPBC12D12.09.1:exon:6	411	5	0	0	0	0	0	0	0	0	0	0	0	0	0	0	0	0	0	0	0	0	0	0	0	0	0	0	0	0	0	0	0	0	0	0	0	0	0	0	0	0	0	0	0	0	0	0
SPBC12D12.09.1:exon:3-SPBC12D12.09.1:exon:6	SPBC12D12.09.1:exon:4;SPBC12D12.09.1:exon:5	229	2	0	0	0	0	0	0	0	0	0	0	0	0	0	0	0	0	0	0	0	0	0	0	0	0	0	0	0	0	0	0	0	0	0	0	0	0	0	0	0	0	0	0	0	0	0	0
SPBC12D12.09.1:exon:4-SPBC12D12.09.1:exon:6	SPBC12D12.09.1:exon:5	116	1	0	0	0	0	0	0	0	0	0	0	0	0	0	0	0	0	0	0	0	0	0	0	0	0	0	0	0	0	0	0	0	0	0	0	0	0	0	0	0	0	0	0	0	0	0	0
SPBC12D12.09.1:exon:5-SPBC12D12.09.1:exon:7	SPBC12D12.09.1:exon:6	104	1	0	0	0	0	0	0	0	0	0	0	1	0	0	0	0	0	0	0	0	0	0	0	0	0	0	0	0	0	0	0	0	0	0	0	0	0	0	0	0	0	0	0	0	0	0	0
SPBC19G7.17.1:exon:1-SPBC19G7.17.1:exon:4	SPBC19G7.17.1:exon:2;SPBC19G7.17.1:exon:3	181	2	0	0	0	0	0	0	0	0	0	1	0	0	0	0	0	0	0	0	0	0	0	0	0	0	0	0	0	0	0	0	0	0	0	0	0	0	0	0	0	1	1	0	0	0	0	0
SPBC19G7.17.1:exon:2-SPBC19G7.17.1:exon:4	SPBC19G7.17.1:exon:3	113	1	0	0	0	0	0	0	0	0	0	0	0	0	0	0	0	0	0	0	0	0	0	0	0	0	0	0	0	0	0	0	0	0	0	0	0	0	0	0	0	0	0	0	0	0	0	0
SPBC557.03c.1:five_prime_UTR:2-SPBC557.03c.1:exon:1	SPBC557.03c.1:exon:2	618	1	0	0	0	0	0	0	0	0	0	0	0	0	0	0	0	0	0	0	0	0	0	0	0	0	0	0	0	0	0	0	0	0	0	0	0	0	0	0	0	0	0	0	0	0	0	0
SPBC365.08c.1:exon:3-SPBC365.08c.1:exon:1	SPBC365.08c.1:exon:2	95	1	0	0	0	0	0	0	0	0	0	0	0	0	0	0	0	0	0	0	0	0	0	0	0	0	1	0	0	0	0	0	0	0	0	0	0	0	0	0	0	1	0	0	0	0	0	0
SPBC29A10.17.1:exon:3-SPBC29A10.17.1:exon:5	SPBC29A10.17.1:exon:4	78	1	0	0	0	0	0	0	0	0	0	0	0	0	0	0	0	0	0	0	0	0	0	0	0	0	0	0	0	0	0	0	0	0	0	0	0	0	0	0	0	0	0	0	0	0	0	0
SPBC3E7.07c.1:exon:6-SPBC3E7.07c.1:exon:4	SPBC3E7.07c.1:exon:5	12	1	0	0	0	0	0	0	0	0	0	0	0	0	0	0	0	0	0	0	0	0	0	0	0	0	0	0	0	0	0	0	0	0	0	0	0	0	0	0	0	0	0	0	0	0	0	0
SPBC4F6.07c.1:exon:3-SPBC4F6.07c.1:exon:1	SPBC4F6.07c.1:exon:2	289	1	0	0	0	0	0	0	0	0	0	0	0	0	0	0	0	0	0	0	0	0	0	0	0	0	0	0	0	0	0	0	0	0	0	0	0	0	0	0	0	2	1	0	0	0	0	0
SPBC685.02.1:exon:1-SPBC685.02.1:exon:3	SPBC685.02.1:exon:2	65	1	0	0	0	0	0	0	0	0	0	0	0	0	0	0	0	0	0	0	0	0	0	0	0	0	0	0	0	0	0	0	0	0	0	0	0	0	0	0	0	0	0	0	0	0	0	0
SPBC685.02.1:exon:2-SPBC685.02.1:exon:4	SPBC685.02.1:exon:3	777	1	0	0	0	0	0	0	0	0	0	0	0	0	0	0	0	0	0	0	0	0	0	0	0	0	0	0	0	0	0	0	0	0	0	0	0	0	0	0	0	0	0	0	0	0	0	0
SPBC32F12.04.1:exon:1-SPBC32F12.04.1:exon:3	SPBC32F12.04.1:exon:2	113	1	0	0	0	0	0	0	0	0	0	0	0	0	0	0	0	0	0	0	0	0	0	0	0	0	0	0	0	0	0	0	0	0	0	0	0	0	0	0	0	0	0	0	0	0	0	0
SPBC32F12.04.1:exon:1-SPBC32F12.04.1:exon:5	SPBC32F12.04.1:exon:2;SPBC32F12.04.1:exon:3;SPBC32F12.04.1:exon:4	644	3	0	0	0	0	0	0	0	0	0	0	0	0	0	0	0	0	0	0	0	0	0	0	0	0	0	0	0	0	0	0	0	0	0	0	0	0	0	0	0	0	0	0	0	0	0	0
SPBC32F12.04.1:exon:4-SPBC32F12.04.1:exon:6	SPBC32F12.04.1:exon:5	465	1	0	0	0	0	0	0	0	0	0	0	0	0	0	0	0	0	0	0	0	0	0	0	0	0	0	0	0	0	0	0	0	0	0	0	0	0	0	0	0	0	0	0	0	0	0	0
SPBC19C7.11.1:exon:2-SPBC19C7.11.1:exon:4	SPBC19C7.11.1:exon:3	434	1	0	0	0	0	0	0	0	0	0	0	0	0	0	0	0	0	0	0	0	0	0	0	0	0	0	0	0	0	0	0	0	0	0	0	0	0	0	0	0	0	0	0	0	0	0	0
SPBC1703.04.1:exon:1-SPBC1703.04.1:exon:3	SPBC1703.04.1:exon:2	138	1	0	0	0	0	0	0	0	0	0	0	0	1	0	0	0	0	0	0	0	0	0	0	0	0	0	0	0	0	0	0	0	0	0	3	0	0	0	0	0	1	0	0	0	0	0	0
SPBC1703.04.1:exon:1-SPBC1703.04.1:exon:4	SPBC1703.04.1:exon:2;SPBC1703.04.1:exon:3	311	2	0	0	0	0	0	0	0	0	0	0	0	0	0	0	0	0	0	0	0	0	0	0	0	0	0	0	0	0	0	0	0	0	0	0	0	0	0	0	0	0	0	0	0	0	0	0
SPBC1703.08c.1:exon:4-SPBC1703.08c.1:exon:1	SPBC1703.08c.1:exon:3;SPBC1703.08c.1:exon:2	291	2	0	0	0	0	0	0	0	0	0	1	0	0	0	0	0	0	0	0	0	0	0	0	0	0	0	0	0	0	0	0	0	0	0	0	0	0	0	0	0	1	0	0	0	0	0	1
SPBC2D10.07c.1:exon:3-SPBC2D10.07c.1:exon:1	SPBC2D10.07c.1:exon:2	127	1	0	0	0	0	0	0	0	0	0	0	0	0	0	0	0	0	1	0	0	0	0	0	0	0	0	0	0	0	0	0	0	0	0	0	0	0	0	0	0	0	0	0	0	0	0	0
SPBC1778.08c.1:exon:4-SPBC1778.08c.1:exon:1	SPBC1778.08c.1:exon:3;SPBC1778.08c.1:exon:2	376	2	0	0	0	0	0	0	0	0	0	0	0	0	0	0	0	0	0	0	0	0	0	0	0	0	0	0	0	0	0	0	0	0	0	0	0	0	0	0	0	0	0	0	0	0	0	0
SPBC1778.10c.1:exon:5-SPBC1778.10c.1:exon:2	SPBC1778.10c.1:exon:4;SPBC1778.10c.1:exon:3	347	2	0	0	0	0	0	0	0	0	0	0	0	0	0	0	0	0	0	0	0	0	0	0	0	0	0	0	0	0	0	0	0	0	0	0	0	0	0	0	0	0	0	0	0	0	0	0
SPBC4C3.10c.1:exon:2-SPBC4C3.10c.1:exon:4	SPBC4C3.10c.1:exon:3	133	1	0	0	0	0	0	0	0	0	0	1	1	0	0	0	0	0	0	0	0	0	0	0	0	0	0	0	0	0	0	0	0	0	0	0	0	0	0	0	0	0	0	0	0	0	0	0
SPBC405.04c.1:exon:3-SPBC405.04c.1:exon:1	SPBC405.04c.1:exon:2	324	1	0	0	0	0	0	0	0	0	0	0	0	1	0	0	0	0	0	0	0	0	0	0	0	0	0	0	0	0	0	0	0	0	0	0	0	0	0	0	0	0	0	0	0	0	1	1
SPBC776.15c.1:exon:3-SPBC776.15c.1:exon:1	SPBC776.15c.1:exon:2	72	1	0	0	0	0	0	0	0	0	0	0	0	0	0	0	0	0	0	0	1	0	0	0	0	0	0	0	0	0	0	0	0	0	0	0	0	0	0	0	0	0	1	0	0	0	0	0
SPBC776.18c.1:exon:6-SPBC776.18c.1:exon:4	SPBC776.18c.1:exon:5	104	1	0	0	0	0	0	0	0	0	0	0	0	0	0	0	0	0	0	0	0	0	0	0	0	0	0	0	0	0	0	0	0	0	0	0	0	0	0	0	0	0	0	0	0	0	2	0
SPBC19F8.01c.1:exon:6-SPBC19F8.01c.1:exon:4	SPBC19F8.01c.1:exon:5	82	1	0	0	0	0	0	0	0	0	0	0	0	0	0	0	0	0	0	0	0	0	0	0	0	0	0	0	0	0	0	0	0	0	0	0	0	0	0	0	0	0	0	0	0	0	0	0
SPBC19F8.01c.1:exon:3-SPBC19F8.01c.1:exon:1	SPBC19F8.01c.1:exon:2	113	1	0	0	0	0	0	0	0	0	0	0	0	0	0	0	0	0	0	0	0	0	0	0	0	0	0	0	0	0	0	0	0	0	0	0	0	0	0	0	0	0	0	0	0	0	0	0
SPBC25H2.18.1:exon:3-SPBC25H2.18.1:exon:1	SPBC25H2.18.1:exon:2	115	1	0	0	0	0	0	0	0	0	0	0	0	0	0	0	0	0	0	0	0	0	0	0	0	0	0	0	0	0	0	0	0	0	0	0	0	0	0	0	0	0	0	0	0	0	0	0
SPBC25H2.12c.1:exon:1-SPBC25H2.12c.1:exon:3	SPBC25H2.12c.1:exon:2	424	1	0	0	0	0	0	0	0	0	0	0	1	0	0	0	1	0	0	0	0	0	0	0	0	0	0	0	0	0	0	0	0	0	0	0	0	0	0	0	0	0	1	0	0	0	0	0
SPBC25H2.03.1:exon:3-SPBC25H2.03.1:exon:1	SPBC25H2.03.1:exon:2	80	1	0	0	0	0	0	0	0	0	0	0	0	0	0	0	0	0	0	0	0	0	0	0	0	0	0	0	0	0	0	0	0	0	0	0	0	0	0	0	0	0	0	0	0	0	0	0
SPBC17D1.02.1:exon:1-SPBC17D1.02.1:exon:4	SPBC17D1.02.1:exon:2;SPBC17D1.02.1:exon:3	870	2	0	0	0	0	0	0	0	0	0	0	0	0	0	0	0	0	0	0	0	0	0	0	0	0	0	0	0	0	0	0	0	0	0	0	0	0	0	0	0	0	0	0	0	0	0	0
SPBC11C11.11c.1:exon:6-SPBC11C11.11c.1:exon:4	SPBC11C11.11c.1:exon:5	132	1	0	0	0	0	0	0	0	0	0	0	0	0	0	0	0	0	0	0	0	0	0	0	0	0	0	0	0	0	0	0	0	0	0	0	0	0	0	0	0	0	0	0	0	0	0	1
SPBC4B4.05.1:exon:2-SPBC4B4.05.1:exon:4	SPBC4B4.05.1:exon:3	108	1	0	0	0	0	0	0	0	0	0	0	0	0	0	0	0	0	0	0	0	0	0	0	0	0	0	0	0	0	0	0	0	0	0	0	0	0	0	0	0	0	0	0	0	0	0	0
SPBC2G2.03c.1:exon:4-SPBC2G2.03c.1:exon:1	SPBC2G2.03c.1:exon:3;SPBC2G2.03c.1:exon:2	194	2	0	0	0	0	0	0	0	0	0	0	0	0	0	0	0	0	0	0	0	0	0	0	0	0	0	0	0	0	0	0	0	0	0	0	0	0	2	0	0	0	0	0	0	0	0	0
SPBC2G2.03c.1:exon:3-SPBC2G2.03c.1:exon:1	SPBC2G2.03c.1:exon:2	132	1	0	0	0	0	0	0	0	0	0	1	0	0	0	0	0	0	0	0	0	0	0	0	0	0	0	0	0	0	0	0	0	0	1	0	0	0	0	0	0	0	0	0	0	0	0	0
SPBC2G2.15c.1:exon:5-SPBC2G2.15c.1:exon:2	SPBC2G2.15c.1:exon:4;SPBC2G2.15c.1:exon:3	287	2	0	0	0	0	0	0	0	0	0	0	0	0	0	0	0	0	0	0	0	0	0	0	0	0	0	0	0	0	0	0	0	0	0	0	0	0	0	0	0	0	0	0	0	0	0	0
SPBC1105.09.1:exon:2-SPBC1105.09.1:exon:5	SPBC1105.09.1:exon:3;SPBC1105.09.1:exon:4	256	2	0	0	0	0	0	0	0	0	0	0	0	0	0	0	0	0	1	0	0	0	0	0	0	0	0	0	0	0	0	0	0	0	0	0	0	0	0	0	0	0	0	0	0	0	0	0
SPBC19F5.05c.1:exon:3-SPBC19F5.05c.1:exon:1	SPBC19F5.05c.1:exon:2	168	1	0	0	0	0	0	0	0	0	0	0	0	0	0	0	0	0	0	0	0	0	0	0	0	0	0	0	0	0	0	0	0	0	0	0	0	0	0	0	0	0	0	0	0	0	0	0
SPBC31F10.12.1:exon:3-SPBC31F10.12.1:exon:5	SPBC31F10.12.1:exon:4	205	1	0	0	0	0	0	0	0	0	0	0	0	0	0	0	0	0	0	0	0	0	0	0	0	0	0	0	0	0	0	0	0	0	0	0	0	0	0	0	0	0	0	0	0	0	0	0
SPBC31F10.16.1:exon:1-SPBC31F10.16.1:exon:3	SPBC31F10.16.1:exon:2	127	1	0	0	0	0	0	0	0	0	0	0	0	0	0	0	0	0	0	0	0	0	0	0	0	0	0	0	0	0	0	0	0	0	0	0	0	0	0	0	0	0	0	0	0	0	0	0
SPBC26H8.05c.1:exon:3-SPBC26H8.05c.1:exon:1	SPBC26H8.05c.1:exon:2	455	1	0	0	0	0	0	0	0	0	0	0	0	0	0	0	0	0	1	0	0	0	0	0	0	0	0	0	0	0	0	0	0	0	0	0	0	0	0	0	0	0	0	0	0	0	0	0
SPBC3B9.08c.1:exon:7-SPBC3B9.08c.1:exon:2	SPBC3B9.08c.1:exon:6;SPBC3B9.08c.1:exon:5;SPBC3B9.08c.1:exon:4;SPBC3B9.08c.1:exon:3	183	4	0	0	0	0	0	0	0	0	0	0	0	0	0	0	0	0	0	0	0	0	0	0	0	0	0	0	0	0	0	0	0	0	0	0	0	0	0	0	0	0	0	0	0	0	0	0
SPBC3B9.10.1:exon:2-SPBC3B9.10.1:exon:4	SPBC3B9.10.1:exon:3	111	1	0	0	0	0	0	0	0	0	0	0	0	0	0	0	0	0	0	0	0	0	0	0	0	0	0	0	0	0	0	0	0	0	0	0	0	0	0	0	0	0	0	0	0	0	0	0
SPBC3B9.10.1:exon:4-SPBC3B9.10.1:exon:6	SPBC3B9.10.1:exon:5	62	1	0	0	0	0	0	0	0	0	0	0	0	0	0	0	0	0	0	3	0	0	0	0	0	0	0	0	0	0	0	0	0	0	0	0	0	0	0	0	0	0	0	0	0	0	0	0
SPBC215.03c.1:exon:4-SPBC215.03c.1:exon:2	SPBC215.03c.1:exon:3	275	1	0	0	0	0	0	0	0	0	0	1	0	0	0	0	0	0	0	0	0	0	0	0	0	0	0	0	0	0	0	0	0	0	0	0	0	0	0	1	0	1	0	0	0	0	0	0
SPBC16G5.12c.1:exon:6-SPBC16G5.12c.1:exon:3	SPBC16G5.12c.1:exon:5;SPBC16G5.12c.1:exon:4	870	2	0	0	0	0	0	0	0	0	0	0	0	0	0	0	0	0	0	0	0	0	0	0	0	0	0	0	0	0	0	0	0	0	0	0	0	0	0	0	0	0	0	0	0	0	0	0
SPBC16G5.12c.1:exon:4-SPBC16G5.12c.1:exon:2	SPBC16G5.12c.1:exon:3	137	1	0	0	0	0	0	0	0	0	0	0	0	0	0	0	0	0	0	0	0	0	0	0	0	0	0	0	0	0	0	0	0	0	0	0	0	0	0	0	0	0	0	0	0	0	0	0
SPBC16A3.12c.1:exon:2-SPBC16A3.12c.1:exon:5	SPBC16A3.12c.1:exon:3;SPBC16A3.12c.1:exon:4	738	2	0	0	0	0	0	0	0	0	0	0	0	0	0	0	0	0	0	0	0	0	0	0	0	0	0	0	0	0	0	0	0	0	0	0	0	0	0	0	0	0	0	0	0	0	0	0
SPBC543.03c.1:exon:4-SPBC543.03c.1:exon:2	SPBC543.03c.1:exon:3	55	1	0	0	0	0	0	0	0	0	0	0	0	0	2	0	0	0	0	0	0	0	0	0	0	0	0	0	0	0	0	0	0	0	0	0	0	0	0	0	0	0	0	0	0	0	0	0
SPBC543.03c.1:exon:3-SPBC543.03c.1:exon:1	SPBC543.03c.1:exon:2	67	1	0	0	0	0	0	0	0	0	0	0	0	0	0	0	0	0	0	0	0	0	0	0	0	0	0	0	0	0	0	0	0	0	0	0	0	0	0	1	1	0	0	0	0	0	0	0
SPBC1289.02c.1:exon:3-SPBC1289.02c.1:exon:1	SPBC1289.02c.1:exon:2	572	1	0	0	0	0	0	0	0	0	0	0	0	1	0	0	0	0	0	0	0	0	0	0	0	0	0	0	0	0	0	0	0	0	0	0	0	0	0	0	0	0	0	0	0	0	0	2
SPBC1198.04c.1:exon:5-SPBC1198.04c.1:exon:3	SPBC1198.04c.1:exon:4	122	1	0	0	0	0	0	0	0	0	0	0	0	0	0	0	0	0	0	0	0	0	0	0	0	0	0	0	0	0	0	0	0	0	0	0	0	0	0	0	0	0	0	0	0	0	0	0
SPBC1198.04c.1:exon:4-SPBC1198.04c.1:exon:1	SPBC1198.04c.1:exon:3;SPBC1198.04c.1:exon:2	944	2	0	0	0	0	0	0	0	0	0	0	0	0	0	0	0	0	0	0	0	0	0	0	0	0	0	0	0	0	0	0	0	0	0	0	0	0	0	0	0	0	0	0	0	0	0	1
SPBC660.15.1:exon:2-SPBC660.15.1:exon:4	SPBC660.15.1:exon:3	41	1	0	0	0	0	0	0	0	0	0	0	0	0	0	0	0	0	0	0	0	0	0	0	0	0	0	0	0	0	0	0	0	0	0	0	0	0	0	0	0	0	0	0	0	0	0	0
SPBC660.15.1:exon:2-SPBC660.15.1:exon:5	SPBC660.15.1:exon:3;SPBC660.15.1:exon:4	205	2	0	0	0	0	0	0	0	0	0	0	1	0	0	0	0	0	0	0	0	0	0	0	0	0	0	0	0	0	0	0	0	0	0	0	0	0	0	0	0	0	0	0	0	0	0	0
SPBC800.09.1:exon:1-SPBC800.09.1:exon:4	SPBC800.09.1:exon:2;SPBC800.09.1:exon:3	241	2	0	0	0	0	0	0	0	0	0	0	0	0	0	0	0	0	0	0	0	0	0	0	0	0	0	0	0	0	0	0	0	0	0	0	0	0	0	0	1	0	0	0	0	0	0	0
SPBC1271.12.1:exon:5-SPBC1271.12.1:exon:3	SPBC1271.12.1:exon:4	79	1	0	0	0	0	0	0	0	0	0	0	0	0	0	0	0	0	0	0	0	0	0	0	0	0	0	0	0	0	1	0	0	0	0	0	0	0	0	0	0	0	0	0	0	0	0	0
SPBC1271.12.1:exon:3-SPBC1271.12.1:exon:1	SPBC1271.12.1:exon:2	313	1	0	0	0	0	0	0	0	0	0	0	0	0	0	0	0	0	0	0	0	0	0	0	0	0	0	0	0	0	0	0	0	0	0	0	0	0	0	0	0	0	0	0	0	0	0	0
SPBC106.12c.1:exon:3-SPBC106.12c.1:exon:1	SPBC106.12c.1:exon:2	67	1	0	0	0	0	0	0	0	0	0	0	0	0	0	0	0	0	0	0	0	0	0	0	0	0	0	0	0	0	0	0	0	0	0	0	0	0	0	0	0	0	0	0	0	0	0	0
SPBC582.04c.1:exon:7-SPBC582.04c.1:exon:5	SPBC582.04c.1:exon:6	126	1	0	0	0	0	0	0	0	0	0	0	0	0	0	0	0	0	0	0	0	0	0	0	0	0	0	0	0	0	0	0	0	0	0	0	0	0	0	0	0	0	0	0	0	0	0	0
SPBC582.04c.1:exon:4-SPBC582.04c.1:exon:1	SPBC582.04c.1:exon:3;SPBC582.04c.1:exon:2	160	2	0	0	0	0	0	0	0	0	0	1	0	0	0	0	0	0	0	0	0	0	0	0	0	0	0	0	0	0	0	0	0	0	0	0	0	0	0	0	0	0	0	0	0	0	0	0
SPBC902.05c.1:exon:5-SPBC902.05c.1:exon:2	SPBC902.05c.1:exon:4;SPBC902.05c.1:exon:3	196	2	0	0	0	0	0	0	0	0	0	0	0	0	0	0	0	0	0	0	0	0	0	0	0	0	0	0	0	0	0	0	0	0	0	0	0	0	0	0	0	0	0	0	0	0	0	0
SPBC354.02c.1:exon:5-SPBC354.02c.1:exon:3	SPBC354.02c.1:exon:4	113	1	0	0	0	0	0	0	0	0	0	0	0	0	0	0	0	0	0	0	0	0	0	0	0	0	0	0	0	0	0	0	0	0	0	0	0	0	0	0	0	0	0	0	0	0	0	0
SPBC354.07c.1:exon:5-SPBC354.07c.1:exon:1	SPBC354.07c.1:exon:4;SPBC354.07c.1:exon:3;SPBC354.07c.1:exon:2	241	3	0	0	0	0	0	0	0	0	0	0	1	0	0	0	0	1	0	0	0	0	0	0	0	0	0	0	0	0	0	0	0	0	0	0	0	0	0	0	0	0	0	0	0	0	0	1
SPBC354.14c.1:exon:6-SPBC354.14c.1:exon:3	SPBC354.14c.1:exon:5;SPBC354.14c.1:exon:4	204	2	0	0	0	0	0	0	0	0	0	0	0	0	0	0	0	0	0	0	0	0	0	0	0	0	0	0	0	0	0	0	0	0	0	0	0	0	0	0	0	0	0	0	0	0	0	0
SPBC119.07.1:exon:1-SPBC119.07.1:exon:3	SPBC119.07.1:exon:2	128	1	0	0	0	0	0	0	0	0	0	0	0	0	0	0	0	0	0	0	0	0	0	0	0	0	0	0	0	0	0	0	0	0	0	0	0	0	0	0	0	0	0	0	0	0	0	0
SPBC577.13.1:exon:2-SPBC577.13.1:exon:4	SPBC577.13.1:exon:3	52	1	0	0	0	0	0	0	0	0	0	0	0	0	0	0	0	0	0	0	0	0	0	0	0	2	0	0	0	0	0	0	0	0	0	0	0	0	0	0	0	0	0	0	0	0	0	0
SPBC530.16.1:exon:3-SPBC530.16.1:exon:1	SPBC530.16.1:exon:2	52	1	0	0	0	0	0	0	0	0	0	0	0	0	0	0	0	0	0	0	0	0	0	0	0	0	0	0	0	0	0	0	0	0	0	0	0	0	0	0	0	0	0	0	0	0	0	0
SPBC530.13.1:exon:1-SPBC530.13.1:exon:4	SPBC530.13.1:exon:2;SPBC530.13.1:exon:3	220	2	0	0	0	0	0	0	0	0	0	0	1	0	0	0	0	0	0	0	0	0	0	0	0	0	0	0	0	0	0	0	0	0	0	0	0	0	0	0	0	0	0	0	0	0	0	0
SPBC530.13.1:exon:2-SPBC530.13.1:exon:5	SPBC530.13.1:exon:3;SPBC530.13.1:exon:4	262	2	0	0	0	0	0	0	0	0	0	0	0	0	0	0	0	0	0	0	0	0	0	0	0	0	0	0	0	0	0	0	0	0	0	0	0	0	0	0	0	0	0	0	0	0	0	0
SPBC36.09.1:exon:1-SPBC36.09.1:exon:3	SPBC36.09.1:exon:2	1145	1	0	0	0	0	0	0	0	0	0	0	0	0	0	0	0	0	0	0	0	0	0	0	0	0	0	0	0	0	0	0	0	0	0	0	0	0	0	0	0	0	0	0	0	0	0	0
SPBP35G2.06c.1:exon:5-SPBP35G2.06c.1:exon:2	SPBP35G2.06c.1:exon:4;SPBP35G2.06c.1:exon:3	480	2	0	0	0	0	0	0	0	0	0	0	0	0	0	0	0	0	0	0	0	0	0	0	0	0	0	0	0	0	0	0	0	0	0	0	0	0	0	0	0	0	0	0	0	0	0	0
SPBC337.05c.1:exon:3-SPBC337.05c.1:exon:1	SPBC337.05c.1:exon:2	122	1	0	0	0	0	0	0	0	0	0	0	0	0	0	0	0	0	0	0	0	0	0	0	0	0	0	0	0	0	0	0	0	0	0	0	0	0	0	0	0	0	0	0	0	0	1	0
SPBC337.07c.1:exon:5-SPBC337.07c.1:exon:2	SPBC337.07c.1:exon:4;SPBC337.07c.1:exon:3	235	2	0	0	0	0	0	0	0	0	0	0	0	0	0	0	0	0	0	0	0	0	0	0	0	0	0	0	0	0	0	0	0	0	0	0	0	0	0	0	0	0	0	0	0	0	0	0
SPBC337.07c.1:exon:3-SPBC337.07c.1:exon:1	SPBC337.07c.1:exon:2	248	1	0	0	0	0	0	0	0	0	0	0	0	0	0	0	0	0	0	0	0	0	0	0	0	0	0	0	0	0	0	0	0	0	0	0	0	0	0	0	0	0	0	0	0	0	0	0
SPBC1709.02c.1:exon:4-SPBC1709.02c.1:exon:1	SPBC1709.02c.1:exon:3;SPBC1709.02c.1:exon:2	126	2	0	0	0	0	0	0	0	0	0	0	0	0	0	0	0	0	0	0	0	0	0	0	0	0	0	0	0	0	0	0	0	0	0	0	0	0	0	0	0	0	0	0	0	0	0	0
SPBC1709.02c.1:exon:3-SPBC1709.02c.1:exon:1	SPBC1709.02c.1:exon:2	74	1	0	0	0	0	0	0	0	0	0	0	0	0	0	0	0	0	0	0	0	0	0	0	0	0	0	0	0	0	0	0	0	0	0	0	0	0	0	0	0	0	0	0	0	0	0	0
SPBC1709.03.1:exon:1-SPBC1709.03.1:exon:3	SPBC1709.03.1:exon:2	656	1	0	0	0	0	0	0	0	0	0	0	1	0	0	0	0	0	0	0	0	0	0	0	0	0	0	0	0	0	0	0	0	0	0	0	0	0	0	1	0	0	0	0	0	0	0	0
SPBC1709.20.1:exon:1-SPBC1709.20.1:exon:3	SPBC1709.20.1:exon:2	159	1	0	0	0	0	0	0	0	0	0	0	0	0	0	0	0	0	0	0	0	0	0	0	0	0	0	0	0	0	0	0	0	0	0	0	0	0	0	0	0	0	0	0	0	0	0	0
SPBC1709.14.1:exon:1-SPBC1709.14.1:exon:5	SPBC1709.14.1:exon:2;SPBC1709.14.1:exon:3;SPBC1709.14.1:exon:4	376	3	0	0	0	0	0	0	0	0	0	0	0	0	0	0	0	0	0	0	0	0	0	0	0	0	0	0	0	0	0	0	0	0	0	0	0	0	0	0	0	0	0	0	0	0	0	0
SPBC1709.14.1:exon:2-SPBC1709.14.1:exon:5	SPBC1709.14.1:exon:3;SPBC1709.14.1:exon:4	199	2	0	0	0	0	0	0	0	0	0	0	0	0	0	0	0	0	0	0	0	0	0	0	0	0	0	0	0	0	0	0	0	0	0	0	0	0	0	0	0	0	0	0	0	0	0	0
SPBC3D6.08c.1:exon:4-SPBC3D6.08c.1:exon:1	SPBC3D6.08c.1:exon:3;SPBC3D6.08c.1:exon:2	185	2	0	0	0	0	0	0	0	0	0	1	0	0	0	0	0	0	0	0	0	0	0	0	0	0	0	0	0	0	0	0	0	0	0	0	0	0	0	0	0	0	0	0	0	0	0	0
SPBC27B12.08.1:exon:1-SPBC27B12.08.1:three_prime_UTR:2	SPBC27B12.08.1:exon:2;SPBC27B12.08.1:exon:3;SPBC27B12.08.1:exon:4;SPBC27B12.08.1:exon:5;SPBC27B12.08.1:exon:6;SPBC27B12.08.1:exon:7;SPBC27B12.08.1:exon:8;SPBC27B12.08.1:exon:9	7098	8	0	0	0	0	0	0	0	0	0	0	0	0	0	0	0	0	0	0	0	0	0	0	0	0	0	0	0	0	0	0	0	0	0	0	0	0	0	0	0	0	0	0	0	0	0	0
SPBC27B12.08.1:exon:2-SPBC27B12.08.1:exon:4	SPBC27B12.08.1:exon:3	49	1	0	0	0	0	0	0	0	0	0	0	0	0	0	0	0	0	0	0	0	0	0	0	0	0	0	0	0	0	0	0	0	0	0	0	0	0	0	0	0	0	0	0	0	0	0	0
SPBC27B12.08.1:exon:6-SPBC27B12.08.1:three_prime_UTR:2	SPBC27B12.08.1:exon:7;SPBC27B12.08.1:exon:8;SPBC27B12.08.1:exon:9	2141	3	0	0	0	0	0	0	0	0	0	0	0	0	0	0	0	0	0	0	0	0	0	0	0	0	0	0	0	0	0	0	0	0	0	0	0	0	0	0	0	0	0	0	0	0	0	0
SPBC8D2.07c.1:exon:3-SPBC8D2.07c.1:exon:1	SPBC8D2.07c.1:exon:2	88	1	0	0	0	0	0	0	0	0	0	0	0	0	0	0	0	0	0	0	0	0	0	0	0	0	0	0	0	0	0	0	0	0	0	0	0	0	0	0	0	0	0	0	0	0	0	0
SPBP22H7.06.1:exon:1-SPBP22H7.06.1:exon:5	SPBP22H7.06.1:exon:2;SPBP22H7.06.1:exon:3;SPBP22H7.06.1:exon:4	461	3	0	0	0	0	0	0	0	0	0	0	0	0	0	0	0	0	0	0	0	0	0	0	0	0	0	0	0	0	0	0	0	0	0	0	0	0	0	0	0	0	0	0	0	0	0	0
SPBC1215.02c.1:exon:7-SPBC1215.02c.1:exon:2	SPBC1215.02c.1:exon:6;SPBC1215.02c.1:exon:5;SPBC1215.02c.1:exon:4;SPBC1215.02c.1:exon:3	1937	4	0	0	0	0	0	0	0	0	0	0	0	0	0	0	0	0	0	0	0	0	0	0	0	0	0	0	0	0	0	0	0	0	0	0	0	0	0	0	0	0	0	0	0	0	0	0
SPBC1215.02c.1:exon:3-SPBC1215.02c.1:exon:1	SPBC1215.02c.1:exon:2	219	1	0	0	0	0	0	0	0	0	0	0	0	0	0	0	0	0	0	0	0	0	0	0	0	0	0	0	0	0	0	0	0	0	0	0	0	0	0	0	0	0	0	0	0	0	0	0
SPBC83.15.1:exon:1-SPBC83.15.1:exon:3	SPBC83.15.1:exon:2	119	1	0	0	0	0	0	0	0	0	0	0	0	0	0	0	0	0	0	0	0	0	0	0	0	0	0	0	0	0	0	0	0	0	0	0	0	0	0	0	0	0	0	0	0	0	0	0
SPBC83.15.1:exon:3-SPBC83.15.1:exon:5	SPBC83.15.1:exon:4	98	1	0	0	0	0	0	0	0	0	0	0	0	0	0	0	0	0	0	0	0	0	0	0	0	0	0	0	1	3	0	0	0	0	0	0	0	0	0	0	0	0	0	0	0	0	0	0
SPBC28F2.09.1:exon:1-SPBC28F2.09.1:exon:3	SPBC28F2.09.1:exon:2	102	1	0	0	0	0	0	0	0	0	0	1	0	0	0	0	0	0	1	0	0	0	0	0	0	0	0	0	0	0	0	0	0	0	0	0	0	0	0	1	0	0	0	0	0	0	0	0
SPBC21B10.09.1:exon:3-SPBC21B10.09.1:exon:1	SPBC21B10.09.1:exon:2	410	1	0	0	0	0	0	0	0	0	0	0	0	0	0	0	0	0	0	0	0	0	0	0	0	0	0	0	0	0	0	0	0	0	0	0	0	0	0	0	0	0	1	0	0	0	0	0
SPBC2F12.05c.1:exon:2-SPBC2F12.05c.1:exon:4	SPBC2F12.05c.1:exon:3	173	1	0	0	0	0	0	0	0	0	0	0	0	0	0	0	0	0	0	0	0	0	0	0	0	0	0	0	0	0	0	0	0	0	0	0	0	0	0	0	0	0	0	0	0	0	0	0
SPBC3H7.01.1:exon:4-SPBC3H7.01.1:exon:2	SPBC3H7.01.1:exon:3	285	1	0	0	0	0	0	0	0	0	0	0	0	0	0	0	0	0	0	0	0	0	0	0	0	0	0	0	0	0	0	0	0	0	0	0	0	0	0	0	0	0	0	0	0	0	0	0
SPBC16E9.12c.1:exon:4-SPBC16E9.12c.1:exon:1	SPBC16E9.12c.1:exon:3;SPBC16E9.12c.1:exon:2	342	2	0	0	0	0	0	0	0	0	0	0	0	0	0	0	0	0	0	0	0	0	0	0	0	0	0	0	0	0	0	0	0	0	0	0	0	0	0	0	0	0	0	0	0	0	0	0
SPBC16E9.16c.1:exon:3-SPBC16E9.16c.1:exon:1	SPBC16E9.16c.1:exon:2	1096	1	0	0	0	0	0	0	0	0	0	0	0	0	0	0	0	0	0	0	0	0	0	0	0	0	0	0	0	0	0	0	0	0	0	0	0	0	0	0	0	0	0	0	0	0	1	1
SPBC29A3.05.1:exon:2-SPBC29A3.05.1:exon:4	SPBC29A3.05.1:exon:3	80	1	0	0	0	0	0	0	0	0	0	0	0	0	0	0	0	0	0	0	0	0	0	0	0	0	0	0	0	0	0	0	0	0	0	0	0	0	0	0	0	0	0	0	0	0	0	0
SPBC29A3.10c.1:exon:5-SPBC29A3.10c.1:exon:2	SPBC29A3.10c.1:exon:4;SPBC29A3.10c.1:exon:3	82	2	0	0	0	0	0	0	0	0	0	0	0	0	0	0	0	0	0	0	0	0	0	0	0	0	0	0	0	0	0	0	0	0	0	0	0	0	0	0	0	0	0	0	0	0	0	0
SPBC23G7.16.1:exon:1-SPBC23G7.16.1:exon:4	SPBC23G7.16.1:exon:2;SPBC23G7.16.1:exon:3	287	2	0	0	0	0	0	0	0	0	0	0	0	0	0	0	0	0	0	0	0	0	0	0	0	0	0	0	0	0	0	0	0	0	0	0	0	0	0	0	0	0	1	0	0	0	0	0
SPBC17G9.08c.1:exon:5-SPBC17G9.08c.1:exon:2	SPBC17G9.08c.1:exon:4;SPBC17G9.08c.1:exon:3	327	2	0	0	0	0	0	0	0	0	0	0	0	0	0	0	0	0	0	0	0	0	0	0	0	0	0	0	0	0	0	0	0	0	0	0	0	0	0	0	0	0	0	0	0	0	0	0
SPBC17G9.08c.1:exon:4-SPBC17G9.08c.1:exon:2	SPBC17G9.08c.1:exon:3	144	1	0	0	0	0	0	0	0	0	0	0	0	0	0	0	0	0	0	0	0	0	0	0	0	0	0	0	0	0	0	0	0	0	0	0	0	0	0	0	0	0	0	0	0	0	0	0
SPBC15C4.02.1:exon:1-SPBC15C4.02.1:exon:3	SPBC15C4.02.1:exon:2	983	1	0	0	0	0	0	0	0	0	0	0	0	0	0	0	0	0	0	0	0	0	0	0	0	0	0	0	0	0	0	0	0	0	0	0	0	0	0	0	0	0	0	0	0	0	0	0
SPBC16H5.12c.1:exon:1-SPBC16H5.12c.1:exon:3	SPBC16H5.12c.1:exon:2	163	1	0	0	0	0	0	0	0	0	0	0	0	0	0	0	0	0	0	0	0	0	0	0	0	2	0	0	0	0	1	0	0	0	0	0	0	0	0	0	0	0	0	0	0	0	0	0
SPBC16H5.12c.1:exon:1-SPBC16H5.12c.1:exon:4	SPBC16H5.12c.1:exon:2;SPBC16H5.12c.1:exon:3	275	2	0	0	0	0	0	0	0	0	0	1	1	0	0	0	0	0	0	0	0	0	0	0	0	0	0	0	0	0	0	0	0	0	0	0	0	0	0	0	0	0	0	0	0	0	0	0
SPBC16H5.12c.1:exon:2-SPBC16H5.12c.1:exon:4	SPBC16H5.12c.1:exon:3	112	1	0	0	0	0	0	0	0	0	0	0	0	0	1	0	0	0	0	0	0	0	0	0	0	0	0	0	0	0	0	0	0	0	0	0	0	0	0	0	0	0	0	0	0	0	0	0
SPBC21D10.05c.1:exon:1-SPBC21D10.05c.1:exon:3	SPBC21D10.05c.1:exon:2	107	1	0	0	0	0	0	0	0	0	0	0	0	0	0	0	0	0	0	0	0	0	0	0	0	0	0	1	0	1	0	0	0	0	0	0	0	0	0	0	1	0	0	0	0	0	0	0
SPBC12C2.11.1:exon:3-SPBC12C2.11.1:exon:1	SPBC12C2.11.1:exon:2	71	1	0	0	0	0	0	0	0	0	0	0	0	0	0	0	0	0	0	0	0	0	0	0	0	0	0	0	0	0	1	0	0	0	0	0	0	0	0	0	0	0	0	0	0	0	0	0
SPBC12C2.05c.1:exon:5-SPBC12C2.05c.1:exon:7	SPBC12C2.05c.1:exon:6	357	1	0	0	0	0	0	0	0	0	0	0	0	0	0	0	0	0	0	0	0	0	0	0	0	0	0	0	0	0	0	0	0	0	0	0	0	0	0	0	0	0	0	0	0	0	0	0
SPBC17F3.02.1:exon:3-SPBC17F3.02.1:exon:1	SPBC17F3.02.1:exon:2	487	1	0	0	0	0	0	0	0	0	0	0	0	0	0	0	0	0	0	0	0	0	0	0	0	0	0	0	0	0	0	0	0	0	0	0	0	0	0	0	0	0	0	0	0	0	0	0
SPBC365.14c.1:exon:3-SPBC365.14c.1:exon:1	SPBC365.14c.1:exon:2	63	1	0	0	0	0	0	0	0	0	0	0	0	0	0	0	0	0	0	0	0	0	0	0	0	0	0	1	0	0	0	0	0	0	0	0	0	0	0	0	0	0	0	0	0	0	0	0
SPBC2G5.07c.1:exon:3-SPBC2G5.07c.1:exon:1	SPBC2G5.07c.1:exon:2	269	1	0	0	0	0	0	0	0	0	0	0	0	0	0	0	0	0	0	0	0	0	0	0	0	0	0	0	0	0	0	0	0	0	0	0	0	0	0	0	0	0	0	0	0	0	0	0
SPBC6B1.05c.1:exon:7-SPBC6B1.05c.1:exon:5	SPBC6B1.05c.1:exon:6	106	1	0	0	0	0	0	0	0	0	0	0	0	0	0	0	0	0	0	0	0	0	0	0	0	0	0	0	0	0	0	0	0	0	0	0	0	0	0	0	0	0	0	0	0	0	0	0
SPBC6B1.05c.1:exon:5-SPBC6B1.05c.1:exon:1	SPBC6B1.05c.1:exon:4;SPBC6B1.05c.1:exon:3;SPBC6B1.05c.1:exon:2	1016	3	0	0	0	0	0	0	0	0	0	0	0	0	0	0	0	0	0	0	0	0	0	0	0	0	0	0	0	0	0	0	0	0	0	0	0	0	0	0	0	0	0	0	0	0	0	0
SPBC6B1.05c.1:exon:3-SPBC6B1.05c.1:exon:1	SPBC6B1.05c.1:exon:2	425	1	0	0	0	0	0	0	0	0	0	0	0	0	0	0	0	0	0	0	0	0	0	0	0	0	0	0	0	0	0	0	0	0	0	0	0	0	0	0	0	0	0	0	0	0	1	0
SPBC6B1.09c.1:exon:6-SPBC6B1.09c.1:exon:2	SPBC6B1.09c.1:exon:5;SPBC6B1.09c.1:exon:4;SPBC6B1.09c.1:exon:3	318	3	0	0	0	0	0	0	0	0	0	0	0	0	0	0	0	0	0	0	0	0	0	0	0	0	0	0	0	0	0	0	0	0	0	0	0	0	0	0	0	0	0	0	0	0	0	0
SPBC3E7.04c.1:exon:7-SPBC3E7.04c.1:exon:3	SPBC3E7.04c.1:exon:6;SPBC3E7.04c.1:exon:5;SPBC3E7.04c.1:exon:4	452	3	0	0	0	0	0	0	0	0	0	0	1	0	0	0	0	0	0	0	0	0	0	0	0	0	0	0	0	0	0	0	0	0	0	0	0	0	0	0	0	0	0	0	0	0	0	0
SPBC3E7.04c.1:exon:4-SPBC3E7.04c.1:exon:2	SPBC3E7.04c.1:exon:3	738	1	0	0	0	0	0	0	0	0	0	0	0	0	0	0	0	0	0	0	0	0	0	0	0	0	0	0	0	0	0	0	0	0	0	0	0	0	0	0	0	0	0	0	0	0	0	0
SPBC3E7.10.1:exon:1-SPBC3E7.10.1:exon:3	SPBC3E7.10.1:exon:2	21	1	0	0	0	0	0	0	0	0	0	0	0	0	0	1	0	0	0	0	0	0	0	0	0	0	0	0	0	0	0	0	0	0	0	0	0	0	0	0	0	0	0	0	0	0	0	0
SPBC3E7.10.1:exon:1-SPBC3E7.10.1:exon:4	SPBC3E7.10.1:exon:2;SPBC3E7.10.1:exon:3	67	2	0	0	0	0	0	0	0	0	0	0	0	0	0	0	0	0	0	0	0	0	0	0	0	0	0	0	0	0	0	0	0	0	0	0	0	0	0	0	0	0	1	0	0	0	0	0
SPBC336.14c.1:exon:12-SPBC336.14c.1:exon:9	SPBC336.14c.1:exon:11;SPBC336.14c.1:exon:10	136	2	0	0	0	0	0	0	0	0	0	0	0	0	0	0	0	0	0	0	0	0	0	0	0	0	0	0	0	0	0	0	0	0	0	0	0	0	0	0	0	0	0	0	0	0	0	0
SPBC336.14c.1:exon:12-SPBC336.14c.1:exon:7	SPBC336.14c.1:exon:11;SPBC336.14c.1:exon:10;SPBC336.14c.1:exon:9;SPBC336.14c.1:exon:8	389	4	0	0	0	0	0	0	0	0	0	0	0	0	0	0	0	0	0	0	0	0	0	0	0	0	0	0	0	0	0	0	0	0	0	0	0	0	0	0	0	0	0	0	0	0	0	0
SPBC336.14c.1:exon:8-SPBC336.14c.1:exon:6	SPBC336.14c.1:exon:7	145	1	0	0	0	0	0	0	0	0	0	1	0	0	0	0	0	0	0	0	0	0	0	0	0	0	0	0	0	3	0	0	0	0	0	0	0	0	0	0	0	0	0	0	0	0	0	0
SPBC336.14c.1:exon:7-SPBC336.14c.1:exon:1	SPBC336.14c.1:exon:6;SPBC336.14c.1:exon:5;SPBC336.14c.1:exon:4;SPBC336.14c.1:exon:3;SPBC336.14c.1:exon:2	1097	5	0	0	0	0	0	0	0	0	0	0	0	0	0	0	0	0	0	0	0	0	0	0	0	0	0	0	0	0	0	0	0	0	0	0	0	0	0	0	0	0	0	0	0	0	0	0
SPBC336.14c.1:exon:5-SPBC336.14c.1:exon:3	SPBC336.14c.1:exon:4	226	1	0	0	0	0	0	0	0	0	0	0	0	0	0	0	0	0	0	0	0	0	0	0	0	0	0	0	0	0	0	0	0	0	0	0	0	0	0	0	0	0	0	0	0	0	0	0
SPBC32F12.06.1:five_prime_UTR:1-SPBC32F12.06.1:exon:2	SPBC32F12.06.1:exon:1	235	1	0	0	0	0	0	0	0	0	0	0	0	0	0	0	0	0	0	0	0	0	0	0	0	0	0	0	0	0	0	0	0	0	0	0	2	0	0	0	0	0	0	0	0	0	0	0
SPBC32F12.12c.1:exon:4-SPBC32F12.12c.1:exon:2	SPBC32F12.12c.1:exon:3	38	1	0	0	0	0	0	0	0	0	0	1	0	0	0	0	0	0	0	0	0	0	0	0	0	0	0	0	0	0	0	0	0	0	0	0	0	0	0	0	0	1	0	0	0	0	0	0
SPBC19C7.10.1:exon:4-SPBC19C7.10.1:exon:6	SPBC19C7.10.1:exon:5	1047	1	0	0	0	0	0	0	0	0	0	0	0	0	0	0	0	0	0	0	0	0	0	0	0	0	0	0	0	0	0	0	0	0	0	0	0	0	0	0	0	1	0	0	0	0	0	1
SPBC1703.10.1:exon:1-SPBC1703.10.1:exon:4	SPBC1703.10.1:exon:2;SPBC1703.10.1:exon:3	172	2	0	0	0	0	0	0	0	0	0	1	0	0	0	0	0	0	0	0	0	0	0	0	0	0	0	0	0	0	0	0	0	0	0	0	0	0	0	0	0	0	0	0	0	0	0	0
SPBC2A9.08c.1:exon:3-SPBC2A9.08c.1:exon:1	SPBC2A9.08c.1:exon:2	164	1	0	0	0	0	0	0	0	0	0	0	0	0	0	0	0	0	0	0	0	0	0	0	0	0	0	0	0	0	0	0	0	0	0	0	0	0	0	0	0	0	0	0	0	0	0	0
SPBC2A9.09.1:exon:1-SPBC2A9.09.1:exon:3	SPBC2A9.09.1:exon:2	327	1	0	0	0	0	0	0	0	0	0	0	0	0	0	0	0	0	0	0	0	0	0	0	0	0	0	0	0	0	0	0	0	0	0	0	1	0	0	0	0	0	0	0	0	0	0	0
SPBC2D10.19c.1:exon:3-SPBC2D10.19c.1:exon:1	SPBC2D10.19c.1:exon:2	52	1	0	0	0	0	0	0	0	0	0	0	0	0	0	0	0	0	0	4	0	0	0	0	0	0	0	4	0	0	0	0	0	0	0	0	0	1	0	0	1	0	0	0	0	0	0	0
SPBC13E7.10c.1:exon:3-SPBC13E7.10c.1:exon:1	SPBC13E7.10c.1:exon:2	113	1	0	0	0	0	0	0	0	0	0	0	0	0	0	0	0	0	0	0	0	0	0	0	0	0	0	2	0	0	1	0	0	0	0	0	0	0	0	1	0	1	2	0	0	0	0	0
SPBC776.05.1:exon:3-SPBC776.05.1:exon:5	SPBC776.05.1:exon:4	125	1	0	0	0	0	0	0	0	0	0	0	0	0	0	0	0	0	0	0	0	0	0	0	0	0	0	0	0	0	0	0	0	0	0	0	0	0	0	0	0	0	0	0	0	0	0	0
SPBC776.09.1:exon:1-SPBC776.09.1:exon:3	SPBC776.09.1:exon:2	50	1	0	0	0	0	0	0	0	0	0	0	0	1	0	0	0	0	0	1	0	0	0	0	0	0	0	0	3	0	0	0	1	0	0	0	0	0	0	0	0	1	0	0	0	0	0	0
SPBC776.14.1:exon:5-SPBC776.14.1:exon:10	SPBC776.14.1:exon:6;SPBC776.14.1:exon:7;SPBC776.14.1:exon:8;SPBC776.14.1:exon:9	662	4	0	0	0	0	0	0	0	0	0	0	0	0	0	0	0	0	0	0	0	0	0	0	0	0	0	0	0	0	0	0	0	0	0	0	0	0	0	0	0	0	0	0	0	0	0	0
SPBC21.02.1:exon:1-SPBC21.02.1:exon:3	SPBC21.02.1:exon:2	61	1	0	0	0	0	0	0	0	0	0	0	0	0	0	0	0	0	0	0	0	0	0	0	0	0	0	0	0	0	0	0	0	0	0	0	0	0	0	0	0	0	0	0	0	0	0	0
SPBC21.06c.1:exon:10-SPBC21.06c.1:exon:7	SPBC21.06c.1:exon:9;SPBC21.06c.1:exon:8	95	2	0	0	0	0	0	0	0	0	0	0	0	0	0	0	0	0	0	0	0	0	0	0	0	0	0	0	0	0	0	0	0	0	0	0	0	0	0	0	0	0	0	0	0	0	0	0
SPBC21.06c.1:exon:5-SPBC21.06c.1:exon:3	SPBC21.06c.1:exon:4	64	1	0	0	0	0	0	0	0	0	0	0	1	0	0	0	0	0	0	0	0	0	0	0	0	0	0	0	0	0	0	0	0	0	0	0	0	0	0	0	0	0	0	0	0	0	0	0
SPBC21.06c.1:exon:5-SPBC21.06c.1:exon:1	SPBC21.06c.1:exon:4;SPBC21.06c.1:exon:3;SPBC21.06c.1:exon:2	552	3	0	0	0	0	0	0	0	0	0	0	0	0	0	0	0	0	0	0	0	0	0	0	0	0	0	0	0	0	0	0	0	0	0	0	0	0	0	0	0	0	0	0	0	0	0	0
SPBC25H2.16c.1:exon:1-SPBC25H2.16c.1:exon:3	SPBC25H2.16c.1:exon:2	88	1	0	0	0	0	0	0	0	0	0	0	0	0	0	0	0	0	0	0	0	0	0	0	0	0	0	0	0	0	0	0	0	0	0	0	0	0	0	0	0	0	0	0	0	0	0	0
SPBC20F10.01.1:exon:1-SPBC20F10.01.1:exon:3	SPBC20F10.01.1:exon:2	101	1	0	0	0	0	0	0	0	0	0	0	0	0	0	0	0	0	0	0	0	0	0	0	0	0	0	0	0	0	0	0	0	0	0	0	0	0	0	0	0	1	0	0	0	0	0	0
SPBC17D11.06.1:exon:1-SPBC17D11.06.1:exon:4	SPBC17D11.06.1:exon:2;SPBC17D11.06.1:exon:3	788	2	0	0	0	0	0	0	0	0	0	0	0	0	0	0	0	0	0	0	0	0	0	0	0	0	0	0	0	0	0	0	0	0	0	0	0	0	0	0	0	0	0	0	0	0	0	0
SPBC17D1.01.1:exon:1-SPBC17D1.01.1:exon:3	SPBC17D1.01.1:exon:2	383	1	0	0	0	0	0	0	0	0	0	0	0	0	0	0	0	0	0	1	0	0	0	0	0	3	0	0	0	0	0	0	0	0	0	0	0	0	0	0	0	0	0	0	0	0	0	0
SPBC11C11.01.1:exon:1-SPBC11C11.01.1:exon:4	SPBC11C11.01.1:exon:2;SPBC11C11.01.1:exon:3	142	2	0	0	0	0	0	0	0	0	0	0	0	0	0	0	0	0	0	0	0	0	0	0	0	0	0	0	0	0	0	0	0	0	0	0	0	0	0	0	0	0	0	0	0	0	0	0
SPBC11C11.01.1:exon:2-SPBC11C11.01.1:exon:5	SPBC11C11.01.1:exon:3;SPBC11C11.01.1:exon:4	184	2	0	0	0	0	0	0	0	0	0	0	0	0	0	0	0	0	0	0	0	0	0	0	0	0	0	0	0	0	0	0	0	0	0	0	0	0	0	0	0	0	0	0	0	0	0	0
SPBC11C11.01.1:exon:4-SPBC11C11.01.1:exon:6	SPBC11C11.01.1:exon:5	434	1	0	0	0	0	0	0	0	0	0	0	0	0	0	0	0	0	0	0	0	0	0	0	0	0	0	0	0	0	0	0	0	0	0	0	0	0	0	0	0	0	0	0	0	0	0	0
SPBC11C11.01.1:exon:4-SPBC11C11.01.1:exon:7	SPBC11C11.01.1:exon:5;SPBC11C11.01.1:exon:6	613	2	0	0	0	0	0	0	0	0	0	0	0	0	0	0	0	0	0	0	0	0	0	0	0	0	0	0	0	0	0	0	0	0	0	0	0	0	0	0	0	0	0	0	0	0	0	0
SPBC4B4.01c.1:exon:3-SPBC4B4.01c.1:exon:1	SPBC4B4.01c.1:exon:2	89	1	0	0	0	0	0	0	0	0	0	0	0	0	0	0	0	0	0	0	0	0	0	0	0	0	0	0	0	0	0	0	0	0	0	0	0	0	0	0	0	0	0	0	0	0	0	0
SPBC4B4.03.1:exon:1-SPBC4B4.03.1:exon:3	SPBC4B4.03.1:exon:2	69	1	0	0	0	0	0	0	0	0	0	0	0	1	0	0	0	0	0	0	0	0	0	0	0	0	0	0	0	0	0	0	0	0	0	0	0	0	0	0	0	0	0	0	0	0	0	0
SPBC4B4.09.1:exon:4-SPBC4B4.09.1:exon:6	SPBC4B4.09.1:exon:5	596	1	0	0	0	0	0	0	0	0	0	0	0	0	0	0	0	1	0	0	0	0	0	0	0	0	0	0	0	0	0	0	0	0	0	0	0	0	0	0	1	0	0	0	0	0	1	0
SPBC1105.07c.1:exon:5-SPBC1105.07c.1:exon:2	SPBC1105.07c.1:exon:4;SPBC1105.07c.1:exon:3	656	2	0	0	0	0	0	0	0	0	0	1	0	1	0	0	0	1	1	0	0	0	0	0	0	0	0	0	0	0	0	0	0	0	0	0	0	0	0	0	0	1	0	0	0	0	0	0
SPBP8B7.14c.1:exon:3-SPBP8B7.14c.1:exon:1	SPBP8B7.14c.1:exon:2	111	1	0	0	0	0	0	0	0	0	0	0	1	0	0	0	0	0	0	0	0	0	0	0	0	0	0	0	0	0	0	0	0	0	0	0	0	0	0	0	0	0	0	0	0	0	0	0
SPBC13G1.12.1:exon:3-SPBC13G1.12.1:exon:5	SPBC13G1.12.1:exon:4	147	1	0	0	0	0	0	0	0	0	0	2	0	1	0	0	0	0	0	0	0	0	0	0	0	0	0	0	0	0	0	0	0	0	0	0	0	0	0	0	1	0	0	0	0	0	0	0
SPBC13G1.12.1:exon:5-SPBC13G1.12.1:exon:7	SPBC13G1.12.1:exon:6	72	1	0	0	0	0	0	0	0	0	0	0	0	0	0	0	0	0	0	0	0	0	0	0	0	0	0	0	0	0	0	0	0	0	0	0	0	0	0	0	0	0	0	0	0	0	0	0
SPBC31F10.13c.1:exon:5-SPBC31F10.13c.1:exon:2	SPBC31F10.13c.1:exon:4;SPBC31F10.13c.1:exon:3	277	2	0	0	0	0	0	0	0	0	0	0	0	0	0	0	0	0	0	0	0	0	0	0	0	0	0	0	0	0	0	0	0	0	0	0	0	0	0	0	0	0	0	0	0	0	0	0
SPBC31F10.13c.1:exon:4-SPBC31F10.13c.1:exon:2	SPBC31F10.13c.1:exon:3	199	1	0	0	0	0	0	0	0	0	0	0	0	0	0	0	0	0	0	1	0	0	0	0	0	0	0	0	0	0	0	0	0	0	0	0	0	0	0	0	0	1	0	0	0	0	0	0
SPBC23E6.06c.1:exon:3-SPBC23E6.06c.1:exon:1	SPBC23E6.06c.1:exon:2	118	1	0	0	0	0	0	0	0	0	0	0	0	0	0	0	0	1	0	0	0	0	0	0	0	0	0	0	0	0	0	0	0	0	0	0	0	0	0	0	1	2	0	0	0	0	0	0
SPBC1604.10.1:exon:4-SPBC1604.10.1:exon:2	SPBC1604.10.1:exon:3	94	1	0	0	0	0	0	0	0	0	0	0	0	0	0	0	0	0	0	0	0	0	0	0	0	0	0	0	0	1	0	0	0	0	0	0	1	0	0	0	0	0	0	0	0	0	0	0
SPBC26H8.07c.1:exon:4-SPBC26H8.07c.1:exon:2	SPBC26H8.07c.1:exon:3	55	1	0	0	0	0	0	0	0	0	0	0	0	0	0	0	0	0	0	0	0	0	0	0	0	0	0	0	0	0	0	0	0	0	0	0	0	0	0	2	0	0	1	0	0	0	0	0
SPBC1347.05c.1:exon:4-SPBC1347.05c.1:exon:2	SPBC1347.05c.1:exon:3	89	1	0	0	0	0	0	0	0	0	0	0	0	0	0	0	0	0	0	0	0	0	0	0	0	0	0	0	0	0	0	0	0	0	0	0	0	0	0	0	0	0	0	0	0	0	0	0
SPBC1347.13c.1:exon:4-SPBC1347.13c.1:exon:1	SPBC1347.13c.1:exon:3;SPBC1347.13c.1:exon:2	490	2	0	0	0	0	0	0	0	0	0	0	1	0	0	0	0	0	0	0	0	0	0	0	0	0	0	0	0	0	0	0	0	0	0	0	0	0	0	0	0	0	0	0	0	0	0	0
SPBC16A3.08c.1:exon:1-SPBC16A3.08c.1:exon:3	SPBC16A3.08c.1:exon:2	374	1	0	0	0	0	0	0	0	0	0	0	0	0	0	0	0	0	0	0	0	0	0	0	0	0	0	0	0	0	0	0	0	0	0	0	0	0	0	0	0	0	0	0	0	0	0	0
SPBC543.05c.1:exon:5-SPBC543.05c.1:exon:2	SPBC543.05c.1:exon:4;SPBC543.05c.1:exon:3	736	2	0	0	0	0	0	0	0	0	0	0	0	0	0	0	0	0	0	0	0	0	0	0	0	0	0	0	0	0	0	0	0	0	0	0	0	0	0	0	0	0	0	0	0	0	0	0
SPBC543.05c.1:exon:4-SPBC543.05c.1:exon:2	SPBC543.05c.1:exon:3	436	1	0	0	0	0	0	0	0	0	0	0	0	0	0	0	0	0	0	0	0	0	0	0	0	0	0	0	0	0	0	0	0	0	0	0	0	0	0	0	0	0	0	0	0	0	0	0
SPBC543.05c.1:exon:3-SPBC543.05c.1:exon:1	SPBC543.05c.1:exon:2	345	1	0	0	0	0	0	0	0	0	0	0	0	0	0	0	0	0	0	0	0	0	0	0	0	0	0	0	0	0	0	0	0	0	0	0	0	0	0	0	0	0	0	0	0	0	0	0
SPBC1539.05.1:exon:2-SPBC1539.05.1:exon:6	SPBC1539.05.1:exon:3;SPBC1539.05.1:exon:4;SPBC1539.05.1:exon:5	540	3	0	0	0	0	0	0	0	0	0	0	0	0	0	0	0	0	0	0	0	0	0	0	0	0	0	0	0	0	0	0	0	0	0	0	0	0	0	0	0	0	0	0	0	0	0	0
SPBC1539.05.1:exon:3-SPBC1539.05.1:exon:5	SPBC1539.05.1:exon:4	138	1	0	0	0	0	0	0	0	0	0	0	1	0	0	0	0	0	0	0	0	0	0	0	0	0	0	0	0	0	0	0	0	0	0	0	0	0	0	0	0	0	0	0	0	0	0	0
SPBC1289.05c.1:exon:4-SPBC1289.05c.1:exon:1	SPBC1289.05c.1:exon:3;SPBC1289.05c.1:exon:2	144	2	0	0	0	0	0	0	0	0	0	0	0	0	0	0	0	0	0	0	0	0	0	0	0	0	0	0	0	0	0	0	0	0	0	0	0	0	0	0	0	0	0	0	0	0	0	0
SPBC1289.11.1:exon:3-SPBC1289.11.1:exon:6	SPBC1289.11.1:exon:4;SPBC1289.11.1:exon:5	504	2	0	0	0	0	0	0	0	0	0	0	0	0	0	0	0	0	0	0	0	0	0	0	0	0	0	0	0	0	0	0	0	0	0	0	0	0	0	0	0	0	0	0	0	0	0	0
SPCC1235.09.1:exon:2-SPCC1235.09.1:exon:4	SPCC1235.09.1:exon:3	420	1	0	0	0	0	0	0	0	0	0	0	0	0	0	0	0	0	1	0	0	0	0	0	0	0	0	0	0	0	0	0	0	0	0	0	0	0	0	1	0	0	0	0	0	0	0	0
SPCC1235.10c.1:exon:5-SPCC1235.10c.1:exon:3	SPCC1235.10c.1:exon:4	28	1	0	0	0	0	0	0	0	0	0	0	0	0	0	0	0	0	0	0	0	0	0	0	0	0	0	0	0	0	0	0	0	0	0	2	0	0	0	0	0	1	0	0	0	0	0	0
SPCC1235.10c.1:exon:4-SPCC1235.10c.1:exon:2	SPCC1235.10c.1:exon:3	105	1	0	0	0	0	0	0	0	0	0	0	0	0	0	0	0	0	0	0	0	0	0	0	0	0	0	0	0	0	0	0	0	0	0	0	0	0	0	0	0	0	0	0	0	0	0	0
SPCC1235.10c.1:exon:4-SPCC1235.10c.1:exon:1	SPCC1235.10c.1:exon:3;SPCC1235.10c.1:exon:2	171	2	0	0	0	0	0	0	0	0	0	0	0	0	0	0	0	0	0	0	0	0	0	0	0	0	0	0	0	0	0	0	0	0	0	0	0	0	0	0	0	0	0	0	0	0	0	0
SPCC1235.11.1:exon:2-SPCC1235.11.1:exon:4	SPCC1235.11.1:exon:3	95	1	0	0	0	0	0	0	0	0	0	0	0	0	0	0	0	0	0	0	0	0	0	0	0	0	0	0	0	0	0	0	0	0	0	0	0	0	0	0	0	0	0	0	0	0	0	0
SPCC1235.11.1:exon:2-SPCC1235.11.1:exon:6	SPCC1235.11.1:exon:3;SPCC1235.11.1:exon:4;SPCC1235.11.1:exon:5	231	3	0	0	0	0	0	0	0	0	0	0	0	0	0	0	0	0	0	0	0	0	0	0	0	0	0	0	0	0	0	0	0	0	0	0	0	0	0	0	0	0	0	0	0	0	0	0
SPCC1235.11.1:exon:4-SPCC1235.11.1:exon:6	SPCC1235.11.1:exon:5	95	1	0	0	0	0	0	0	0	0	0	0	0	0	0	0	0	0	0	0	0	0	0	0	0	0	0	0	0	0	0	0	0	0	0	0	1	0	0	0	0	0	0	0	0	0	0	0
SPCC548.04.1:exon:1-SPCC548.04.1:exon:4	SPCC548.04.1:exon:2;SPCC548.04.1:exon:3	263	2	0	0	0	0	0	0	0	0	0	0	0	0	0	0	0	0	0	0	0	0	0	0	0	0	0	0	0	0	0	0	0	0	0	0	0	0	0	0	0	0	0	0	0	0	0	0
SPCC548.04.1:exon:2-SPCC548.04.1:exon:4	SPCC548.04.1:exon:3	110	1	0	0	0	0	0	0	0	0	0	0	0	0	0	0	0	0	0	0	0	0	0	0	0	0	0	0	0	0	0	0	0	0	0	0	0	0	0	0	0	0	0	0	0	0	0	0
SPCC553.11c.1:exon:1-SPCC553.11c.1:exon:3	SPCC553.11c.1:exon:2	6	1	0	0	0	0	0	0	0	0	0	0	0	0	0	0	0	0	0	0	0	0	0	0	0	0	0	0	0	0	0	0	0	0	0	0	0	0	0	0	0	0	0	0	0	0	0	0
SPCC553.08c.1:exon:1-SPCC553.08c.1:exon:3	SPCC553.08c.1:exon:2	2153	1	0	0	0	0	0	0	0	0	0	0	1	0	0	0	0	0	0	0	0	0	0	0	0	0	0	0	0	0	0	0	0	0	0	0	0	0	0	0	0	0	0	0	0	0	0	0
SPCC306.05c.1:exon:3-SPCC306.05c.1:exon:1	SPCC306.05c.1:exon:2	164	1	0	0	0	0	0	0	0	0	0	0	0	0	0	0	0	0	0	0	0	0	0	0	0	0	0	0	0	0	0	0	0	0	0	0	0	0	0	0	0	0	0	0	0	0	0	0
SPCC4G3.15c.1:exon:1-SPCC4G3.15c.1:exon:4	SPCC4G3.15c.1:exon:2;SPCC4G3.15c.1:exon:3	616	2	0	0	0	0	0	0	0	0	0	0	0	0	0	0	0	0	0	0	0	0	0	0	0	0	0	0	0	0	0	0	0	0	0	0	0	0	0	0	0	0	0	0	0	0	0	0
SPCC364.05.1:exon:5-SPCC364.05.1:exon:3	SPCC364.05.1:exon:4	65	1	0	0	0	0	0	0	0	0	0	0	0	0	0	0	0	0	0	0	0	0	0	0	0	0	0	0	0	0	0	0	0	0	0	0	0	0	0	0	0	0	0	0	0	0	0	0
SPCC970.12.1:exon:6-SPCC970.12.1:exon:1	SPCC970.12.1:exon:5;SPCC970.12.1:exon:4;SPCC970.12.1:exon:3;SPCC970.12.1:exon:2	269	4	0	0	0	0	0	0	0	0	0	0	0	0	0	0	0	0	0	0	0	0	0	0	0	0	0	0	0	0	0	0	0	0	0	0	0	0	0	0	0	0	0	0	0	0	0	0
SPCC970.12.1:exon:5-SPCC970.12.1:exon:1	SPCC970.12.1:exon:4;SPCC970.12.1:exon:3;SPCC970.12.1:exon:2	208	3	0	0	0	0	0	0	0	0	0	0	0	0	0	0	0	0	0	0	0	0	0	0	0	0	0	0	0	0	0	0	0	0	0	0	0	0	0	0	0	0	0	0	0	0	0	0
SPCC970.01.1:exon:9-SPCC970.01.1:exon:7	SPCC970.01.1:exon:8	123	1	0	0	0	0	0	0	0	0	0	0	0	0	0	0	0	0	0	0	0	0	0	0	0	0	0	0	0	0	0	0	0	0	0	0	0	0	0	0	0	0	0	0	0	0	0	0
SPCC970.01.1:exon:8-SPCC970.01.1:exon:6	SPCC970.01.1:exon:7	477	1	0	0	0	0	0	0	0	0	0	0	0	0	0	0	0	0	0	0	0	0	0	0	0	0	0	0	0	0	0	0	0	0	0	0	0	0	0	0	0	0	0	0	0	0	0	0
SPCC970.01.1:exon:8-SPCC970.01.1:exon:5	SPCC970.01.1:exon:7;SPCC970.01.1:exon:6	761	2	0	0	0	0	0	0	0	0	0	0	0	0	0	0	0	1	0	0	0	0	0	0	0	0	0	0	0	0	0	0	0	0	1	0	0	0	0	0	0	0	0	0	0	0	0	0
SPCC31H12.07.1:exon:1-SPCC31H12.07.1:exon:3	SPCC31H12.07.1:exon:2	172	1	0	0	0	0	0	0	0	0	0	0	0	0	0	0	0	0	0	0	0	0	0	0	0	0	0	0	0	0	0	0	0	0	0	0	0	0	0	0	0	0	1	0	0	0	0	0
SPCC18B5.11c.1:exon:7-SPCC18B5.11c.1:exon:4	SPCC18B5.11c.1:exon:6;SPCC18B5.11c.1:exon:5	117	2	0	0	0	0	0	0	0	0	0	0	0	0	0	0	0	0	0	0	0	0	0	0	0	0	0	0	0	0	0	0	0	0	0	0	0	3	0	0	0	0	0	0	0	0	0	0
SPCC1020.07.1:exon:4-SPCC1020.07.1:exon:1	SPCC1020.07.1:exon:3;SPCC1020.07.1:exon:2	106	2	0	0	0	0	0	0	0	0	0	0	0	0	0	0	0	0	0	0	0	0	0	0	0	0	0	0	0	0	0	0	0	0	0	0	0	0	0	0	0	0	0	0	0	0	0	0
SPCC895.09c.1:exon:5-SPCC895.09c.1:exon:1	SPCC895.09c.1:exon:4;SPCC895.09c.1:exon:3;SPCC895.09c.1:exon:2	2811	3	0	0	0	0	0	0	0	0	0	0	0	0	0	0	0	0	0	0	0	0	0	0	0	0	0	0	0	0	0	0	0	0	0	0	0	0	0	0	0	0	0	0	0	0	0	0
SPCC895.09c.1:exon:4-SPCC895.09c.1:exon:2	SPCC895.09c.1:exon:3	601	1	0	0	0	0	0	0	0	0	0	0	0	0	0	0	0	0	0	0	0	0	0	0	0	0	0	0	0	0	0	0	0	0	0	0	0	0	0	0	0	0	0	0	0	0	0	0
SPCC1259.13.1:exon:2-SPCC1259.13.1:exon:4	SPCC1259.13.1:exon:3	429	1	0	0	0	0	0	0	0	0	0	0	0	0	0	0	0	0	0	0	0	0	0	0	0	0	0	0	0	0	0	0	0	0	0	0	0	0	0	0	0	0	0	0	0	0	0	0
SPCC4B3.05c.1:exon:1-SPCC4B3.05c.1:exon:3	SPCC4B3.05c.1:exon:2	35	1	0	0	0	0	0	0	0	0	0	0	0	0	0	0	0	0	0	0	0	0	0	0	0	0	0	0	0	0	0	0	0	0	0	0	0	0	0	0	0	0	0	0	0	0	0	0
SPCC338.05c.1:exon:1-SPCC338.05c.1:exon:3	SPCC338.05c.1:exon:2	139	1	0	0	0	0	0	0	0	0	0	0	0	0	0	0	0	0	0	0	0	0	0	0	0	0	0	0	0	0	0	0	0	0	0	0	0	0	0	0	0	0	0	0	0	0	0	0
SPCC285.08.1:exon:1-SPCC285.08.1:exon:4	SPCC285.08.1:exon:2;SPCC285.08.1:exon:3	444	2	0	0	0	0	0	0	0	0	0	0	0	0	0	0	0	0	0	0	0	0	0	0	0	0	0	0	0	0	0	0	0	0	0	0	0	0	0	0	0	0	0	0	0	0	0	0
SPCC285.17.1:exon:1-SPCC285.17.1:exon:3	SPCC285.17.1:exon:2	212	1	0	0	0	0	0	0	0	0	0	0	0	0	0	0	0	0	0	0	0	0	0	0	0	0	0	0	0	0	0	0	0	0	0	0	0	0	0	0	0	0	0	0	0	0	0	0
SPCC74.02c.1:exon:4-SPCC74.02c.1:exon:2	SPCC74.02c.1:exon:3	81	1	0	0	0	0	0	0	0	0	0	0	0	1	0	0	0	0	0	0	0	0	0	0	0	0	0	0	0	0	0	0	0	0	0	0	1	0	0	0	1	0	0	0	0	0	0	0
SPCC18.05c.1:exon:4-SPCC18.05c.1:exon:1	SPCC18.05c.1:exon:3;SPCC18.05c.1:exon:2	693	2	0	0	0	0	0	0	0	0	0	1	1	0	0	0	0	0	0	0	0	0	0	0	0	0	0	0	0	0	0	0	0	0	0	0	0	0	0	0	1	0	2	0	0	0	0	0
SPCC18.10.1:exon:2-SPCC18.10.1:exon:4	SPCC18.10.1:exon:3	307	1	0	0	0	0	0	0	0	0	0	0	0	0	0	0	0	0	0	0	0	0	0	0	0	3	0	0	0	0	0	0	0	0	0	0	0	0	0	0	0	0	0	0	0	0	0	0
SPCC18.12c.1:exon:3-SPCC18.12c.1:exon:1	SPCC18.12c.1:exon:2	90	1	0	0	0	0	0	0	0	0	0	0	0	0	0	0	0	0	0	0	0	0	0	0	0	0	0	0	0	0	0	0	0	0	0	0	0	0	0	0	0	0	0	0	0	0	0	0
SPCC1739.03.1:exon:1-SPCC1739.03.1:exon:3	SPCC1739.03.1:exon:2	462	1	0	0	0	0	0	0	0	0	0	0	0	0	0	0	0	0	0	0	0	0	0	0	0	0	0	0	0	0	0	0	0	0	0	0	0	0	0	0	0	0	0	0	0	0	0	0
SPCC1739.04c.1:exon:4-SPCC1739.04c.1:exon:1	SPCC1739.04c.1:exon:3;SPCC1739.04c.1:exon:2	474	2	0	0	0	0	0	0	0	0	0	0	0	1	0	0	0	0	0	0	0	0	0	0	0	0	0	0	0	0	0	0	0	0	0	0	0	0	0	0	0	0	0	0	0	0	0	0
SPCC1739.04c.1:exon:3-SPCC1739.04c.1:exon:1	SPCC1739.04c.1:exon:2	196	1	0	0	0	0	0	0	0	0	0	0	0	0	0	0	0	0	0	0	0	0	0	0	0	0	0	0	0	0	0	0	0	0	0	0	0	0	0	0	0	0	0	0	0	0	0	0
SPCC1620.01c.1:exon:4-SPCC1620.01c.1:exon:2	SPCC1620.01c.1:exon:3	102	1	0	0	0	0	0	0	0	0	0	0	1	0	1	0	0	0	0	0	0	0	0	0	0	0	0	0	2	0	0	0	0	0	0	0	0	0	0	0	0	0	0	0	0	0	0	0
SPCC1620.05.1:exon:3-SPCC1620.05.1:exon:6	SPCC1620.05.1:exon:4;SPCC1620.05.1:exon:5	410	2	0	0	0	0	0	0	0	0	0	0	0	0	0	0	0	0	0	0	0	0	0	0	0	0	0	0	0	0	0	0	0	0	0	0	0	0	0	0	0	0	0	0	0	0	0	0
SPCC830.02.1:pseudogenic_exon:1-SPCC830.02.1:pseudogenic_exon:3	SPCC830.02.1:pseudogenic_exon:2	249	1	0	0	0	0	0	0	0	0	0	0	0	0	0	0	0	0	0	0	0	0	0	0	0	0	0	0	0	0	0	1	0	0	0	0	0	0	0	0	1	0	0	0	0	0	0	0
SPCC830.08c.1:exon:3-SPCC830.08c.1:exon:1	SPCC830.08c.1:exon:2	283	1	0	0	0	0	0	0	0	0	0	0	0	0	0	0	0	0	0	0	0	0	0	0	0	0	0	0	0	0	0	0	0	0	0	0	0	0	0	0	0	0	1	0	0	0	0	0
SPCC830.10.1:exon:4-SPCC830.10.1:exon:6	SPCC830.10.1:exon:5	32	1	0	0	0	0	0	0	0	0	0	0	1	0	0	0	0	0	0	0	0	0	0	0	0	0	0	0	0	0	0	0	0	0	0	0	0	0	0	0	0	0	0	0	0	0	0	0
SPCC1919.02.1:exon:1-SPCC1919.02.1:exon:3	SPCC1919.02.1:exon:2	64	1	0	0	0	0	0	0	0	0	0	0	0	0	1	1	0	0	0	0	0	0	0	0	0	0	0	0	0	0	0	0	0	0	0	0	0	0	0	0	0	0	0	0	0	0	0	0
SPCC1919.10c.1:exon:3-SPCC1919.10c.1:exon:1	SPCC1919.10c.1:exon:2	109	1	0	0	0	0	0	0	0	0	0	0	0	0	0	0	0	0	0	0	0	0	0	0	0	0	0	0	0	0	0	0	0	0	0	0	0	0	0	0	1	1	0	0	0	0	0	0
SPCC1919.14c.1:exon:3-SPCC1919.14c.1:exon:1	SPCC1919.14c.1:exon:2	148	1	0	0	0	0	0	0	0	0	0	0	0	0	0	0	0	0	0	0	0	0	0	0	0	0	0	0	0	0	0	0	0	0	0	0	0	0	0	0	0	0	0	0	0	0	0	0
SPCC1840.05c.1:exon:3-SPCC1840.05c.1:exon:1	SPCC1840.05c.1:exon:2	100	1	0	0	0	0	0	0	0	0	0	0	1	0	0	0	2	0	0	0	0	0	0	0	0	0	0	0	0	0	0	0	0	0	0	0	0	0	0	0	0	0	0	0	0	0	0	0
SPCC1840.06.1:exon:3-SPCC1840.06.1:exon:1	SPCC1840.06.1:exon:2	519	1	0	0	0	0	0	0	0	0	0	0	0	0	0	0	0	0	0	0	0	0	0	0	0	0	0	0	0	0	0	0	0	0	0	0	0	0	0	0	0	0	0	0	0	0	0	0
SPCC70.04c.1:exon:3-SPCC70.04c.1:exon:1	SPCC70.04c.1:exon:2	168	1	0	0	0	0	0	0	0	0	0	0	0	0	0	0	0	0	0	0	0	0	0	0	0	0	0	0	0	0	0	0	0	0	0	0	0	0	0	0	0	0	0	0	0	0	0	0
SPCC1827.07c.1:exon:8-SPCC1827.07c.1:exon:6	SPCC1827.07c.1:exon:7	26	1	0	0	0	0	0	0	0	0	0	0	0	0	0	0	0	0	0	0	0	0	0	0	0	0	0	0	0	0	0	0	0	0	0	0	0	0	0	0	0	0	0	0	0	0	0	0
SPCP1E11.03.1:exon:1-SPCP1E11.03.1:exon:3	SPCP1E11.03.1:exon:2	250	1	0	0	0	0	0	0	0	0	0	0	0	0	0	0	0	0	0	0	0	0	0	0	0	0	0	0	0	0	0	0	0	0	0	0	0	0	0	0	0	0	0	0	0	0	0	0
SPCP1E11.08.1:exon:1-SPCP1E11.08.1:exon:3	SPCP1E11.08.1:exon:2	120	1	0	0	0	0	0	0	0	0	0	0	0	0	0	0	0	0	0	0	0	0	0	0	0	0	0	0	0	0	0	0	0	0	0	0	0	0	0	0	0	0	0	0	0	0	0	0
SPCC757.08.1:exon:1-SPCC757.08.1:exon:3	SPCC757.08.1:exon:2	120	1	0	0	0	0	0	0	0	0	0	0	0	0	0	0	0	0	0	0	0	0	0	0	0	0	0	0	0	0	0	0	0	0	0	0	0	0	0	0	1	1	2	0	0	0	0	0
SPCC320.10.1:exon:4-SPCC320.10.1:exon:2	SPCC320.10.1:exon:3	63	1	0	0	0	0	0	0	0	0	0	0	0	0	2	0	0	1	0	0	0	0	0	0	0	0	0	0	0	0	0	0	0	0	0	0	0	0	0	0	0	0	0	0	0	0	0	0
SPCC320.10.1:exon:4-SPCC320.10.1:exon:1	SPCC320.10.1:exon:3;SPCC320.10.1:exon:2	383	2	0	0	0	0	0	0	0	0	0	0	0	0	0	0	0	0	1	0	0	0	0	0	0	0	0	0	0	0	0	0	0	0	0	0	0	0	0	0	0	0	3	0	0	0	0	1
SPCC320.04c.1:exon:1-SPCC320.04c.1:exon:4	SPCC320.04c.1:exon:2;SPCC320.04c.1:exon:3	213	2	0	0	0	0	0	0	0	0	0	1	0	0	0	0	0	0	1	0	0	0	0	0	0	0	0	0	0	0	0	0	0	0	0	0	0	0	0	1	1	2	0	0	0	0	2	0
SPCC320.04c.1:exon:2-SPCC320.04c.1:exon:5	SPCC320.04c.1:exon:3;SPCC320.04c.1:exon:4	293	2	0	0	0	0	0	0	0	0	0	1	0	0	0	0	0	0	0	0	0	0	0	0	0	0	0	0	0	0	0	0	0	0	0	0	0	0	0	0	0	0	0	0	0	0	0	0
SPCC320.04c.1:exon:3-SPCC320.04c.1:exon:7	SPCC320.04c.1:exon:4;SPCC320.04c.1:exon:5;SPCC320.04c.1:exon:6	265	3	0	0	0	0	0	0	0	0	0	0	0	0	0	0	0	0	0	0	0	0	0	0	0	0	0	0	0	0	0	0	0	0	0	0	0	0	0	0	0	0	0	0	0	0	0	0
SPCC320.04c.1:exon:7-SPCC320.04c.1:exon:12	SPCC320.04c.1:exon:8;SPCC320.04c.1:exon:9;SPCC320.04c.1:exon:10;SPCC320.04c.1:exon:11	695	4	0	0	0	0	0	0	0	0	0	0	0	0	0	0	0	0	0	0	0	0	0	0	0	0	0	0	0	0	0	0	0	0	0	0	0	0	0	0	0	0	0	0	0	0	0	0
SPCC1529.01.1:exon:1-SPCC1529.01.1:exon:4	SPCC1529.01.1:exon:2;SPCC1529.01.1:exon:3	501	2	0	0	0	0	0	0	0	0	0	0	0	0	0	0	0	0	0	0	0	0	0	0	0	0	0	0	0	0	0	0	0	0	0	0	0	0	0	0	1	0	0	0	0	0	0	0
SPCC553.02.1:exon:6-SPCC553.02.1:exon:3	SPCC553.02.1:exon:5;SPCC553.02.1:exon:4	1127	2	0	0	0	0	0	0	0	0	0	0	0	0	0	0	0	0	0	0	0	0	0	0	0	0	0	0	0	0	0	0	0	0	0	0	0	0	0	0	0	1	0	0	0	0	0	0
SPCC553.02.1:exon:4-SPCC553.02.1:exon:1	SPCC553.02.1:exon:3;SPCC553.02.1:exon:2	740	2	0	0	0	0	0	0	0	0	0	0	0	0	0	0	0	0	0	0	0	0	0	0	0	0	0	0	0	0	0	0	0	0	0	0	0	0	0	0	0	0	0	0	0	0	0	0
SPCC553.02.1:exon:3-SPCC553.02.1:exon:1	SPCC553.02.1:exon:2	328	1	0	0	0	0	0	0	0	0	0	0	0	1	0	0	0	0	0	0	0	0	0	0	0	0	0	0	0	0	0	0	0	0	0	0	0	0	0	0	0	0	0	0	0	0	0	0
SPCC1682.05c.1:exon:3-SPCC1682.05c.1:exon:1	SPCC1682.05c.1:exon:2	877	1	0	0	0	0	0	0	0	0	0	0	0	0	0	0	0	0	0	0	0	0	0	0	0	0	0	0	0	0	0	0	0	0	0	0	0	0	0	0	0	0	0	0	0	0	0	0
SPCC970.09.1:exon:4-SPCC970.09.1:exon:1	SPCC970.09.1:exon:3;SPCC970.09.1:exon:2	673	2	0	0	0	0	0	0	0	0	0	0	0	0	0	0	0	0	0	0	0	0	0	0	0	0	0	0	0	0	0	0	0	0	0	0	0	0	0	2	0	0	0	0	0	0	0	0
SPCC1672.12c.1:exon:7-SPCC1672.12c.1:exon:5	SPCC1672.12c.1:exon:6	54	1	0	0	0	0	0	0	0	0	0	0	0	0	0	0	0	0	0	0	0	0	0	0	0	0	0	0	0	0	0	0	0	2	0	0	0	0	0	0	0	0	0	0	0	0	0	0
SPCC1672.12c.1:exon:7-SPCC1672.12c.1:exon:3	SPCC1672.12c.1:exon:6;SPCC1672.12c.1:exon:5;SPCC1672.12c.1:exon:4	291	3	0	0	0	0	0	0	0	0	0	0	1	0	0	0	0	0	0	0	0	0	0	0	0	0	0	0	0	0	0	0	0	0	0	0	0	0	0	1	0	0	0	0	0	0	0	0
SPCC1672.12c.1:exon:6-SPCC1672.12c.1:exon:4	SPCC1672.12c.1:exon:5	161	1	0	0	0	0	0	0	0	0	0	0	0	0	0	0	0	0	0	0	0	0	0	0	0	0	0	0	0	0	0	0	0	0	0	0	0	0	0	0	0	0	0	0	0	0	0	0
SPCC1672.12c.1:exon:6-SPCC1672.12c.1:exon:3	SPCC1672.12c.1:exon:5;SPCC1672.12c.1:exon:4	237	2	0	0	0	0	0	0	0	0	0	0	0	0	0	0	0	0	0	0	0	0	0	0	0	0	0	0	0	0	0	0	0	0	0	0	0	0	0	0	0	0	0	0	0	0	0	0
SPCC1183.01.1:exon:2-SPCC1183.01.1:exon:4	SPCC1183.01.1:exon:3	120	1	0	0	0	0	0	0	0	0	0	0	0	1	1	0	0	0	0	0	0	0	0	0	0	0	0	0	0	0	0	0	0	0	0	0	0	0	0	0	0	0	0	0	0	0	0	0
SPCC1183.01.1:exon:2-SPCC1183.01.1:exon:5	SPCC1183.01.1:exon:3;SPCC1183.01.1:exon:4	559	2	0	0	0	0	0	0	0	0	0	0	0	0	0	0	0	0	0	0	0	0	0	0	0	0	0	0	0	0	0	0	0	0	0	0	0	0	0	0	0	0	0	0	0	0	0	0
SPCC1183.05c.1:exon:12-SPCC1183.05c.1:exon:10	SPCC1183.05c.1:exon:11	11	1	0	0	0	0	0	0	0	0	0	0	0	0	0	0	0	0	0	0	0	0	0	0	0	0	0	0	0	0	0	0	0	0	0	0	0	0	0	0	0	0	0	0	0	0	0	0
SPCC1183.05c.1:exon:10-SPCC1183.05c.1:exon:7	SPCC1183.05c.1:exon:9;SPCC1183.05c.1:exon:8	197	2	0	0	0	0	0	0	0	0	0	0	0	0	0	0	0	0	0	0	0	0	0	0	0	0	0	0	0	0	0	0	0	0	0	0	0	0	0	0	0	0	0	0	0	0	0	0
SPCC1183.05c.1:exon:10-SPCC1183.05c.1:exon:5	SPCC1183.05c.1:exon:9;SPCC1183.05c.1:exon:8;SPCC1183.05c.1:exon:7;SPCC1183.05c.1:exon:6	1441	4	0	0	0	0	0	0	0	0	0	0	0	0	0	0	0	0	0	0	0	0	0	0	0	0	0	0	0	0	0	0	0	0	0	0	0	0	0	0	0	0	0	0	0	0	0	0
SPCC16C4.01.1:exon:1-SPCC16C4.01.1:exon:3	SPCC16C4.01.1:exon:2	266	1	0	0	0	0	0	0	0	0	0	0	0	0	0	0	0	0	0	0	0	0	0	0	0	0	0	0	0	0	0	0	0	0	0	0	0	0	0	0	0	0	0	0	0	0	0	0
SPCC16C4.16c.1:exon:3-SPCC16C4.16c.1:exon:1	SPCC16C4.16c.1:exon:2	253	1	0	0	0	0	0	0	0	0	0	0	0	0	0	1	0	0	0	0	0	0	0	0	0	0	0	0	0	0	0	0	0	0	0	0	0	0	0	1	0	0	0	0	0	0	0	0
SPCC18B5.10c.1:exon:4-SPCC18B5.10c.1:exon:1	SPCC18B5.10c.1:exon:3;SPCC18B5.10c.1:exon:2	324	2	0	0	0	0	0	0	0	0	0	0	0	0	0	0	0	0	0	0	0	0	0	0	0	0	0	0	0	0	0	0	0	0	0	0	0	0	0	0	0	0	0	0	0	0	0	0
SPCC14G10.04.1:exon:2-SPCC14G10.04.1:exon:4	SPCC14G10.04.1:exon:3	53	1	0	0	0	0	0	0	0	0	0	0	1	0	0	0	2	0	0	0	0	0	0	0	0	0	0	0	0	0	0	0	0	0	0	0	0	0	0	0	0	1	2	0	0	0	0	0
SPCC1393.05.1:exon:3-SPCC1393.05.1:exon:5	SPCC1393.05.1:exon:4	50	1	0	0	0	0	0	0	0	0	0	0	0	0	0	0	0	0	0	0	0	0	0	0	0	0	0	0	0	0	0	0	0	0	0	0	0	0	0	0	0	0	0	0	0	0	0	0
SPCC1393.05.1:exon:6-SPCC1393.05.1:exon:8	SPCC1393.05.1:exon:7	48	1	0	0	0	0	0	0	0	0	0	0	0	0	0	0	0	0	0	2	0	0	0	0	0	0	1	0	0	0	0	0	0	0	0	0	0	0	0	1	0	0	0	0	0	0	0	0
SPCC1393.06c.1:exon:4-SPCC1393.06c.1:exon:2	SPCC1393.06c.1:exon:3	73	1	0	0	0	0	0	0	0	0	0	0	0	0	0	0	0	0	0	0	0	0	0	0	0	0	0	0	0	0	0	0	0	0	0	0	0	0	0	0	0	0	0	0	0	0	0	0
SPCC1393.09c.1:exon:4-SPCC1393.09c.1:exon:1	SPCC1393.09c.1:exon:3;SPCC1393.09c.1:exon:2	206	2	0	0	0	0	0	0	0	0	0	0	0	1	1	0	0	0	0	0	0	0	0	0	0	0	0	0	0	0	0	0	0	0	0	0	0	0	0	0	0	0	0	0	0	0	0	0
SPCC16A11.05c.1:exon:4-SPCC16A11.05c.1:exon:2	SPCC16A11.05c.1:exon:3	41	1	0	0	0	0	0	0	0	0	0	0	0	0	0	0	0	0	0	0	0	0	0	0	0	0	0	0	0	1	0	0	0	0	0	0	0	0	0	0	0	0	1	0	0	0	0	0
SPCC24B10.06.1:exon:1-SPCC24B10.06.1:exon:3	SPCC24B10.06.1:exon:2	151	1	0	0	0	0	0	0	0	0	0	0	0	0	0	0	0	0	0	0	0	0	0	0	0	3	0	0	0	0	0	0	0	0	0	0	0	0	0	0	0	0	0	0	0	0	0	0
SPCC24B10.14c.1:five_prime_UTR:2-SPCC24B10.14c.1:exon:1	SPCC24B10.14c.1:exon:2	879	1	0	0	0	0	0	0	0	0	0	0	0	0	0	0	0	0	0	0	0	0	0	0	0	0	0	0	0	0	0	0	0	0	0	0	0	0	0	0	0	0	0	0	0	0	0	0
SPCPB16A4.02c.1:exon:4-SPCPB16A4.02c.1:exon:2	SPCPB16A4.02c.1:exon:3	63	1	0	0	0	0	0	0	0	0	0	0	0	0	0	0	0	0	0	0	0	0	0	0	0	0	0	0	0	0	0	0	0	0	0	0	0	0	0	0	0	0	0	0	0	0	0	0
SPCC1795.08c.1:exon:1-SPCC1795.08c.1:exon:3	SPCC1795.08c.1:exon:2	281	1	0	0	0	0	0	0	0	0	0	0	0	0	0	0	0	0	0	0	0	0	0	0	0	0	0	0	0	0	0	0	0	0	0	0	1	0	0	0	0	0	0	0	0	0	0	0
SPCC1795.04c.1:exon:1-SPCC1795.04c.1:exon:4	SPCC1795.04c.1:exon:2;SPCC1795.04c.1:exon:3	581	2	0	0	0	0	0	0	0	0	0	0	0	0	0	0	0	0	0	0	0	0	0	0	0	0	0	0	0	0	0	0	0	0	0	0	0	0	0	0	0	0	0	0	0	0	0	0
SPCC1795.04c.1:exon:2-SPCC1795.04c.1:exon:4	SPCC1795.04c.1:exon:3	483	1	0	0	0	0	0	0	0	0	0	0	0	0	0	0	0	0	0	0	0	0	0	0	0	0	0	0	0	0	0	0	0	0	0	0	0	0	0	0	0	0	0	0	0	0	0	0
SPCC825.02.1:exon:4-SPCC825.02.1:exon:7	SPCC825.02.1:exon:5;SPCC825.02.1:exon:6	358	2	0	0	0	0	0	0	0	0	0	1	0	1	0	0	0	0	0	0	0	0	0	0	0	0	0	0	0	0	0	0	0	0	0	0	0	0	0	0	0	0	0	0	0	0	0	0
SPCC825.05c.1:exon:3-SPCC825.05c.1:exon:1	SPCC825.05c.1:exon:2	330	1	0	0	0	0	0	0	0	0	0	0	0	0	0	0	0	0	0	0	0	0	0	0	0	0	0	0	0	0	0	0	0	0	0	0	0	0	0	0	0	0	0	0	0	0	0	0
SPCC4B3.04c.1:exon:1-SPCC4B3.04c.1:exon:3	SPCC4B3.04c.1:exon:2	175	1	0	0	0	0	0	0	0	0	0	0	0	0	0	0	0	0	0	0	0	0	0	0	0	0	0	0	0	0	0	0	0	0	0	0	0	0	0	0	0	0	0	0	0	0	0	0
SPCC4E9.01c.1:exon:9-SPCC4E9.01c.1:exon:5	SPCC4E9.01c.1:exon:8;SPCC4E9.01c.1:exon:7;SPCC4E9.01c.1:exon:6	562	3	0	0	0	0	0	0	0	0	0	0	0	0	0	0	0	0	0	0	0	0	0	0	0	0	0	0	0	0	0	0	0	0	0	0	0	0	0	0	0	0	0	0	0	0	0	0
SPCC4E9.01c.1:exon:3-SPCC4E9.01c.1:exon:1	SPCC4E9.01c.1:exon:2	286	1	0	0	0	0	0	0	0	0	0	0	0	0	0	0	0	0	0	0	0	0	0	0	0	0	0	0	0	0	0	0	0	0	0	0	0	0	0	0	0	0	0	0	0	0	0	0
SPCC23B6.01c.1:exon:5-SPCC23B6.01c.1:exon:2	SPCC23B6.01c.1:exon:4;SPCC23B6.01c.1:exon:3	79	2	0	0	0	0	0	0	0	0	0	0	0	0	0	0	0	0	0	0	0	0	0	0	0	0	0	0	0	0	0	0	0	0	0	0	0	0	0	0	0	0	0	0	0	0	0	0
SPCC1322.06.1:exon:1-SPCC1322.06.1:exon:5	SPCC1322.06.1:exon:2;SPCC1322.06.1:exon:3;SPCC1322.06.1:exon:4	2563	3	0	0	0	0	0	0	0	0	0	1	0	0	0	0	0	0	0	0	0	0	0	0	0	0	0	0	0	0	0	0	0	0	0	0	0	0	0	0	0	0	0	0	0	0	0	0
SPCC1322.06.1:exon:3-SPCC1322.06.1:exon:5	SPCC1322.06.1:exon:4	840	1	0	0	0	0	0	0	0	0	0	0	0	0	0	0	0	0	0	0	0	0	0	0	0	0	0	0	0	0	0	0	0	0	0	0	0	0	0	0	0	0	0	0	0	0	0	0
SPCC1322.16.1:exon:1-SPCC1322.16.1:exon:4	SPCC1322.16.1:exon:2;SPCC1322.16.1:exon:3	336	2	0	0	0	0	0	0	0	0	0	0	0	0	0	0	0	0	0	0	0	0	0	0	0	0	0	0	0	0	0	0	0	0	0	0	0	0	0	0	0	0	0	0	0	0	0	0
SPCC1281.08.1:exon:2-SPCC1281.08.1:exon:5	SPCC1281.08.1:exon:3;SPCC1281.08.1:exon:4	284	2	0	0	0	0	0	0	0	0	0	1	0	0	0	0	0	0	0	0	0	0	0	0	0	0	0	0	0	0	0	0	0	0	0	0	0	0	0	0	0	0	0	0	0	0	0	0
SPCC11E10.07c.1:exon:4-SPCC11E10.07c.1:exon:2	SPCC11E10.07c.1:exon:3	140	1	0	0	0	0	0	0	0	0	0	1	0	0	0	0	0	0	0	0	0	0	0	0	0	0	0	0	0	0	0	0	0	0	0	0	0	0	0	0	0	0	0	0	0	0	0	0
SPCC11E10.07c.1:exon:4-SPCC11E10.07c.1:exon:1	SPCC11E10.07c.1:exon:3;SPCC11E10.07c.1:exon:2	583	2	0	0	0	0	0	0	0	0	0	0	0	0	0	0	0	0	0	0	0	0	0	0	0	0	0	0	0	0	0	2	0	0	0	0	0	0	0	0	0	0	0	0	0	0	0	0
SPCC188.02.1:exon:1-SPCC188.02.1:exon:4	SPCC188.02.1:exon:2;SPCC188.02.1:exon:3	310	2	0	0	0	0	0	0	0	0	0	0	1	0	0	0	0	0	0	0	0	0	0	0	0	0	0	0	0	0	0	0	0	0	0	0	0	0	0	0	0	0	0	0	0	0	0	0
SPCC188.02.1:exon:2-SPCC188.02.1:exon:5	SPCC188.02.1:exon:3;SPCC188.02.1:exon:4	969	2	0	0	0	0	0	0	0	0	0	0	0	0	0	0	0	0	0	0	0	0	0	0	0	0	0	0	0	0	0	0	0	0	0	0	0	0	0	0	0	0	1	0	0	0	0	0
SPCC188.03.1:exon:1-SPCC188.03.1:exon:3	SPCC188.03.1:exon:2	132	1	0	0	0	0	0	0	0	0	0	1	0	0	0	0	0	0	0	0	0	0	0	0	0	0	0	0	0	0	0	0	0	0	0	0	0	0	0	0	0	1	0	0	0	0	0	0
SPCC663.02.1:exon:2-SPCC663.02.1:exon:5	SPCC663.02.1:exon:3;SPCC663.02.1:exon:4	315	2	0	0	0	0	0	0	0	0	0	0	0	0	0	0	0	0	0	0	0	0	0	0	0	0	0	0	0	0	0	0	0	0	0	0	0	0	0	0	0	0	0	0	0	0	0	0
SPCC1450.12.1:exon:1-SPCC1450.12.1:exon:4	SPCC1450.12.1:exon:2;SPCC1450.12.1:exon:3	802	2	0	0	0	0	0	0	0	0	0	0	0	0	0	0	0	1	0	0	0	0	0	0	0	0	0	0	0	0	0	0	0	0	0	0	0	0	0	0	0	1	0	0	0	0	0	1
SPCC1442.06.1:exon:1-SPCC1442.06.1:exon:3	SPCC1442.06.1:exon:2	104	1	0	0	0	0	0	0	0	0	0	0	0	0	0	0	0	0	0	0	0	0	0	0	0	0	0	0	0	0	0	0	0	0	0	0	0	0	0	0	0	0	0	0	0	0	0	0
SPCC1442.08c.1:exon:5-SPCC1442.08c.1:exon:2	SPCC1442.08c.1:exon:4;SPCC1442.08c.1:exon:3	42	2	0	0	0	0	0	0	0	0	0	0	0	0	0	0	0	0	0	0	0	0	0	0	0	0	0	0	0	0	0	1	0	0	0	0	0	0	0	1	0	0	0	0	0	0	0	0
SPCC285.07c.1:exon:5-SPCC285.07c.1:exon:3	SPCC285.07c.1:exon:4	214	1	0	0	0	0	0	0	0	0	0	0	1	0	0	0	0	0	1	0	0	0	0	0	0	0	0	0	0	0	0	0	0	0	0	0	0	0	0	0	2	0	0	0	0	0	0	0
SPCC1223.10c.1:exon:3-SPCC1223.10c.1:exon:1	SPCC1223.10c.1:exon:2	87	1	0	0	0	0	0	0	0	0	0	0	0	0	0	0	0	0	0	0	0	0	0	0	0	0	0	0	0	0	0	0	0	0	0	0	0	0	0	0	0	0	0	0	0	0	0	0
SPCC126.02c.1:exon:6-SPCC126.02c.1:exon:3	SPCC126.02c.1:exon:5;SPCC126.02c.1:exon:4	280	2	0	0	0	0	0	0	0	0	0	0	0	0	0	0	0	0	0	0	0	0	0	0	0	0	0	0	0	0	0	0	0	0	0	0	0	0	0	0	0	0	1	0	0	0	0	0
SPCC126.05c.1:exon:3-SPCC126.05c.1:exon:1	SPCC126.05c.1:exon:2	99	1	0	0	0	0	0	0	0	0	0	0	0	0	0	0	0	0	0	0	0	0	0	0	0	0	0	0	0	0	0	0	0	0	0	0	0	0	0	0	0	0	0	0	0	0	0	0
SPCC126.06.1:exon:1-SPCC126.06.1:exon:4	SPCC126.06.1:exon:2;SPCC126.06.1:exon:3	446	2	0	0	0	0	0	0	0	0	0	0	0	1	0	0	0	0	0	0	0	0	0	0	0	0	0	0	0	0	0	0	0	0	0	0	0	0	0	0	0	0	0	0	0	0	0	0
SPCC126.06.1:exon:2-SPCC126.06.1:exon:4	SPCC126.06.1:exon:3	368	1	0	0	0	0	0	0	0	0	0	0	0	0	0	0	0	0	0	0	0	0	0	0	0	0	0	0	0	0	0	0	0	0	0	0	0	0	0	0	0	0	0	0	0	0	0	0
SPCC70.07c.1:exon:3-SPCC70.07c.1:exon:1	SPCC70.07c.1:exon:2	197	1	0	0	0	0	0	0	0	0	0	0	0	0	0	0	0	0	0	0	0	0	0	0	0	0	0	0	0	0	0	0	0	0	0	0	0	0	0	0	0	0	1	0	0	0	0	0
SPCP1E11.10.1:exon:1-SPCP1E11.10.1:exon:3	SPCP1E11.10.1:exon:2	79	1	0	0	0	0	0	0	0	0	0	0	0	0	0	0	0	0	0	0	0	0	0	0	0	0	0	0	0	0	0	0	0	0	0	0	0	0	0	0	0	0	0	0	0	0	0	1
SPAC18B11.07c.1:exon:2-SPAC18B11.07c.1:exon:4	SPAC18B11.07c.1:exon:3	121	1	0	0	0	0	0	0	0	0	0	0	0	0	0	0	0	0	0	0	0	0	0	0	0	0	0	0	0	0	0	0	0	0	0	0	1	0	0	0	0	0	0	0	0	0	0	0
SPAC31A2.05c.1:exon:7-SPAC31A2.05c.1:exon:5	SPAC31A2.05c.1:exon:6	1336	1	0	0	0	0	0	0	0	0	0	0	0	0	0	0	0	0	0	0	0	0	0	0	0	0	0	0	0	0	0	0	0	0	0	0	0	0	0	0	0	0	0	0	0	0	0	0
SPAC31A2.05c.1:exon:5-SPAC31A2.05c.1:exon:3	SPAC31A2.05c.1:exon:4	1784	1	0	0	0	0	0	0	0	0	0	0	0	0	0	0	0	0	0	0	0	0	0	0	0	0	0	0	0	0	0	0	0	0	0	0	0	0	0	0	0	0	0	0	0	0	0	0
SPAC13C5.02.1:exon:1-SPAC13C5.02.1:exon:3	SPAC13C5.02.1:exon:2	217	1	0	0	0	0	0	0	0	0	0	0	0	0	0	0	0	0	0	0	0	0	0	0	0	0	0	0	0	0	0	0	0	0	0	0	0	0	0	0	0	0	0	0	0	0	0	0
SPAC3H8.10.1:exon:1-SPAC3H8.10.1:exon:4	SPAC3H8.10.1:exon:2;SPAC3H8.10.1:exon:3	426	2	0	0	0	0	0	0	0	0	0	0	0	0	0	0	0	0	0	0	0	0	0	0	0	0	0	0	0	0	0	0	0	0	0	0	0	0	0	0	0	0	0	0	0	0	0	0
SPAC22F3.05c.1:exon:2-SPAC22F3.05c.1:exon:5	SPAC22F3.05c.1:exon:3;SPAC22F3.05c.1:exon:4	219	2	0	0	0	0	0	0	0	0	0	0	0	0	0	0	0	0	0	0	0	0	0	0	0	0	0	0	0	0	0	0	0	0	0	0	0	0	0	0	0	0	0	0	0	0	0	0
SPAC22F3.05c.1:exon:3-SPAC22F3.05c.1:exon:6	SPAC22F3.05c.1:exon:4;SPAC22F3.05c.1:exon:5	227	2	0	0	0	0	0	0	0	0	0	0	0	0	0	0	0	0	0	0	0	0	0	0	0	0	0	0	0	0	0	0	0	0	0	0	0	0	0	0	0	0	0	0	0	0	0	0
SPAC22F3.03c.1:exon:3-SPAC22F3.03c.1:exon:6	SPAC22F3.03c.1:exon:4;SPAC22F3.03c.1:exon:5	406	2	0	0	0	0	0	0	0	0	0	0	0	0	0	0	0	0	0	0	0	0	0	0	0	0	0	0	0	0	0	0	0	0	0	0	0	0	0	0	0	0	0	0	0	0	0	0
SPAC1687.11.1:exon:1-SPAC1687.11.1:exon:3	SPAC1687.11.1:exon:2	94	1	0	0	0	0	0	0	0	0	0	0	0	0	0	0	0	0	0	0	0	0	0	0	0	0	0	0	0	0	0	0	0	0	0	0	0	0	0	0	0	0	0	0	0	0	0	0
SPAC1687.11.1:exon:2-SPAC1687.11.1:exon:4	SPAC1687.11.1:exon:3	177	1	0	0	0	0	0	0	0	0	0	0	0	0	0	0	0	0	0	0	0	0	0	0	0	0	0	0	0	0	0	0	0	0	0	0	0	0	0	0	0	0	0	0	0	0	0	0
SPAC23C4.09c.1:exon:3-SPAC23C4.09c.1:exon:1	SPAC23C4.09c.1:exon:2	131	1	0	0	0	0	0	0	0	0	0	0	0	0	0	0	0	0	0	0	0	0	0	0	0	0	0	0	0	0	0	0	0	0	0	0	0	0	0	0	1	0	0	0	0	0	0	0
SPAC23C4.17.1:exon:1-SPAC23C4.17.1:exon:6	SPAC23C4.17.1:exon:2;SPAC23C4.17.1:exon:3;SPAC23C4.17.1:exon:4;SPAC23C4.17.1:exon:5	2000	4	0	0	0	0	0	0	0	0	0	0	0	0	0	0	0	0	0	0	0	0	0	0	0	0	0	0	0	0	0	0	0	0	0	0	0	0	0	0	0	0	0	0	0	0	0	0
SPAC30D11.09.1:exon:3-SPAC30D11.09.1:exon:1	SPAC30D11.09.1:exon:2	268	1	0	0	0	0	0	0	0	0	0	0	0	0	0	0	0	0	0	0	0	0	0	0	0	0	0	0	0	0	0	0	0	0	0	0	0	0	0	0	0	0	0	0	0	0	0	0
SPAC4C5.04.1:exon:1-SPAC4C5.04.1:exon:4	SPAC4C5.04.1:exon:2;SPAC4C5.04.1:exon:3	575	2	0	0	0	0	0	0	0	0	0	0	0	0	0	0	0	0	0	0	0	0	0	0	0	0	0	0	0	0	0	0	0	0	0	0	0	0	0	0	0	0	0	0	0	0	0	0
SPAPB17E12.11.1:exon:3-SPAPB17E12.11.1:exon:5	SPAPB17E12.11.1:exon:4	347	1	0	0	0	0	0	0	0	0	0	0	0	0	0	0	0	0	0	0	0	0	0	0	0	0	0	0	0	0	0	0	0	0	0	0	0	0	0	0	0	0	0	0	0	0	0	0
SPAC57A10.09c.1:exon:3-SPAC57A10.09c.1:exon:1	SPAC57A10.09c.1:exon:2	59	1	0	0	0	0	0	0	0	0	0	0	0	0	0	0	0	0	0	0	0	0	0	0	0	0	0	0	0	0	0	0	0	0	0	0	0	0	0	0	0	0	0	0	0	0	0	0
SPAC20G8.08c.1:exon:5-SPAC20G8.08c.1:exon:1	SPAC20G8.08c.1:exon:4;SPAC20G8.08c.1:exon:3;SPAC20G8.08c.1:exon:2	1068	3	0	0	0	0	0	0	0	0	0	0	0	0	0	0	0	0	0	0	0	0	0	0	0	0	0	0	0	0	0	0	0	0	0	0	0	0	0	0	0	0	0	0	0	0	0	0
SPAC23H4.18c.1:exon:1-SPAC23H4.18c.1:exon:4	SPAC23H4.18c.1:exon:2;SPAC23H4.18c.1:exon:3	241	2	0	0	0	0	0	0	0	0	0	0	0	0	0	0	0	0	0	0	0	0	0	0	0	0	0	0	0	0	0	0	0	0	0	0	0	0	0	0	0	0	0	0	0	0	0	0
SPAP27G11.05c.1:exon:3-SPAP27G11.05c.1:exon:1	SPAP27G11.05c.1:exon:2	1914	1	0	0	0	0	0	0	0	0	0	0	0	0	0	0	0	0	0	0	0	0	0	0	0	0	0	0	0	0	0	0	0	0	0	0	0	0	0	0	0	0	0	0	0	0	0	0
SPAC824.06.1:exon:1-SPAC824.06.1:exon:3	SPAC824.06.1:exon:2	48	1	0	0	0	0	0	0	0	0	0	0	0	0	0	0	0	0	0	0	0	0	0	0	0	0	0	0	0	0	0	0	0	0	0	0	0	0	0	0	0	0	0	0	0	0	0	0
SPAC664.02c.1:exon:4-SPAC664.02c.1:exon:2	SPAC664.02c.1:exon:3	189	1	0	0	0	0	0	0	0	0	0	0	0	0	0	0	0	0	0	0	0	0	0	0	0	0	0	0	0	0	0	0	0	0	0	0	0	0	0	0	0	0	0	0	0	0	0	0
SPAC17A5.07c.1:exon:6-SPAC17A5.07c.1:exon:3	SPAC17A5.07c.1:exon:5;SPAC17A5.07c.1:exon:4	1041	2	0	0	0	0	0	0	0	0	0	0	0	0	0	0	0	0	0	0	0	0	0	0	0	0	0	0	0	0	0	0	0	0	0	0	0	0	0	0	0	0	0	0	0	0	0	0
SPAC1002.07c.1:exon:5-SPAC1002.07c.1:exon:2	SPAC1002.07c.1:exon:4;SPAC1002.07c.1:exon:3	66	2	0	0	0	0	0	0	0	0	0	0	0	0	0	0	0	0	0	0	0	0	0	0	0	0	0	0	0	0	0	0	0	0	0	0	0	0	0	0	0	0	0	0	0	0	0	0
SPAC20H4.09.1:exon:6-SPAC20H4.09.1:exon:8	SPAC20H4.09.1:exon:7	169	1	0	0	0	0	0	0	0	0	0	0	0	0	0	0	0	0	0	0	0	0	0	0	0	0	0	0	0	0	0	0	0	0	0	0	0	0	0	0	0	0	0	0	0	0	0	0
SPAC23C11.10.1:exon:1-SPAC23C11.10.1:exon:3	SPAC23C11.10.1:exon:2	99	1	0	0	0	0	0	0	0	0	0	0	0	0	0	0	0	0	0	0	0	0	0	0	0	0	0	0	0	0	0	0	0	0	0	0	0	0	0	0	0	0	0	0	0	0	0	0
SPAC1B9.03c.1:exon:1-SPAC1B9.03c.1:exon:3	SPAC1B9.03c.1:exon:2	60	1	0	0	0	0	0	0	0	0	0	0	0	0	0	0	0	0	0	0	0	0	0	0	0	0	0	0	0	0	0	0	0	0	0	0	0	0	0	0	0	0	0	0	0	0	0	0
SPAC4A8.08c.1:exon:7-SPAC4A8.08c.1:exon:2	SPAC4A8.08c.1:exon:6;SPAC4A8.08c.1:exon:5;SPAC4A8.08c.1:exon:4;SPAC4A8.08c.1:exon:3	2187	4	0	0	0	0	0	0	0	0	0	0	0	0	0	0	0	0	0	0	0	0	0	0	0	0	0	0	0	0	0	0	0	0	0	0	0	0	0	0	0	0	0	0	0	0	0	0
SPAC6F6.11c.1:exon:5-SPAC6F6.11c.1:exon:2	SPAC6F6.11c.1:exon:4;SPAC6F6.11c.1:exon:3	298	2	0	0	0	0	0	0	0	0	0	0	0	0	0	0	0	0	0	0	0	0	0	0	0	0	0	0	0	1	0	0	0	0	0	0	0	0	0	0	0	0	0	0	0	0	0	0
SPAC6F6.11c.1:exon:4-SPAC6F6.11c.1:exon:2	SPAC6F6.11c.1:exon:3	189	1	0	0	0	0	0	0	0	0	0	0	0	0	0	0	0	0	0	0	0	0	0	0	0	0	0	0	0	0	0	0	0	0	0	0	0	0	0	0	0	0	0	0	0	0	0	0
SPAC1805.03c.1:exon:3-SPAC1805.03c.1:exon:1	SPAC1805.03c.1:exon:2	37	1	0	0	0	0	0	0	0	0	0	0	0	0	0	0	0	0	0	0	0	0	0	0	0	0	0	0	0	0	0	0	0	0	0	0	0	0	0	1	0	0	0	0	0	0	0	0
SPAC24C9.16c.1:exon:4-SPAC24C9.16c.1:exon:2	SPAC24C9.16c.1:exon:3	62	1	0	0	0	0	0	0	0	0	0	0	0	0	0	0	0	0	0	0	0	0	0	0	0	0	0	0	0	0	0	0	0	0	0	0	0	0	0	0	0	1	0	0	0	0	0	0
SPAC24C9.16c.1:exon:4-SPAC24C9.16c.1:exon:1	SPAC24C9.16c.1:exon:3;SPAC24C9.16c.1:exon:2	100	2	0	0	0	0	0	0	0	0	0	0	0	0	0	0	0	0	0	0	0	0	0	0	0	0	0	0	0	0	0	0	0	0	0	0	0	0	0	0	0	0	0	0	0	0	0	0
SPAC16A10.06c.1:exon:3-SPAC16A10.06c.1:exon:1	SPAC16A10.06c.1:exon:2	123	1	0	0	0	0	0	0	0	0	0	0	0	0	1	0	0	0	0	0	0	0	0	0	0	0	0	0	0	0	0	0	0	0	0	0	0	0	0	0	0	0	0	0	0	0	0	0
SPAPB1E7.06c.1:exon:3-SPAPB1E7.06c.1:exon:1	SPAPB1E7.06c.1:exon:2	92	1	0	0	0	0	0	0	0	0	0	0	0	0	1	0	0	0	0	0	0	0	0	0	0	0	0	0	0	0	0	0	0	0	0	0	0	0	0	0	0	0	0	0	0	0	0	0
SPAC959.09c.1:exon:3-SPAC959.09c.1:exon:1	SPAC959.09c.1:exon:2	301	1	0	0	0	0	0	0	0	0	0	0	0	0	0	0	0	0	0	0	0	0	0	0	0	0	0	0	0	0	0	0	0	0	0	0	0	0	0	0	0	0	0	0	0	0	0	0
SPAC1B1.04c.1:exon:7-SPAC1B1.04c.1:exon:3	SPAC1B1.04c.1:exon:6;SPAC1B1.04c.1:exon:5;SPAC1B1.04c.1:exon:4	1505	3	0	0	0	0	0	0	0	0	0	0	0	0	0	0	0	0	0	0	0	0	0	0	0	0	0	0	0	0	0	0	0	0	0	0	0	0	0	0	0	0	0	0	0	0	0	0
SPAC4H3.01.1:exon:1-SPAC4H3.01.1:exon:3	SPAC4H3.01.1:exon:2	73	1	0	0	0	0	0	0	0	0	0	0	0	0	0	0	0	0	0	0	0	0	0	0	0	0	0	0	0	0	0	0	0	0	0	0	0	0	0	0	0	0	0	0	0	0	0	0
SPAC323.02c.1:exon:4-SPAC323.02c.1:exon:1	SPAC323.02c.1:exon:3;SPAC323.02c.1:exon:2	545	2	0	0	0	0	0	0	0	0	0	0	0	0	0	0	0	0	0	0	0	0	0	0	0	0	0	0	0	0	0	0	0	0	0	0	0	0	0	0	0	0	0	0	0	0	0	0
SPAC323.02c.1:exon:3-SPAC323.02c.1:exon:1	SPAC323.02c.1:exon:2	103	1	0	0	0	0	0	0	0	0	0	0	0	0	0	0	0	1	0	0	0	0	0	0	0	0	0	0	0	0	0	0	0	0	0	0	0	0	0	0	0	0	0	0	0	0	0	0
SPAC11G7.02.1:exon:1-SPAC11G7.02.1:exon:3	SPAC11G7.02.1:exon:2	23	1	0	0	0	0	0	0	0	0	0	0	0	0	0	0	0	0	0	0	0	0	0	0	0	0	0	0	0	0	0	0	0	0	0	0	0	0	0	0	0	0	0	0	0	0	0	0
SPAC27E2.10c.1:exon:6-SPAC27E2.10c.1:exon:4	SPAC27E2.10c.1:exon:5	65	1	0	0	0	0	0	0	0	0	0	0	0	0	0	0	0	0	0	0	0	0	0	0	0	0	0	0	0	0	0	0	0	0	0	0	0	0	0	0	0	0	0	0	0	0	0	0
SPAC19G12.07c.1:exon:7-SPAC19G12.07c.1:exon:5	SPAC19G12.07c.1:exon:6	791	1	0	0	0	0	0	0	0	0	0	0	0	0	0	0	0	0	0	0	0	0	0	0	0	0	0	0	0	0	0	0	0	0	0	0	0	0	0	0	0	0	0	0	0	0	0	0
SPAC26H5.02c.1:exon:5-SPAC26H5.02c.1:exon:2	SPAC26H5.02c.1:exon:4;SPAC26H5.02c.1:exon:3	49	2	0	0	0	0	0	0	0	0	0	0	0	0	0	0	0	0	0	0	0	0	0	0	0	0	0	0	0	0	0	0	0	0	0	0	0	0	0	1	0	0	0	0	0	0	0	0
SPAC16.02c.1:exon:10-SPAC16.02c.1:exon:2	SPAC16.02c.1:exon:9;SPAC16.02c.1:exon:8;SPAC16.02c.1:exon:7;SPAC16.02c.1:exon:6;SPAC16.02c.1:exon:5;SPAC16.02c.1:exon:4;SPAC16.02c.1:exon:3	367	7	0	0	0	0	0	0	0	0	0	0	0	0	0	0	0	0	0	0	0	0	0	0	0	0	0	0	0	0	0	0	0	0	0	0	0	0	0	0	0	0	0	0	0	0	0	0
SPAC16.02c.1:exon:8-SPAC16.02c.1:exon:4	SPAC16.02c.1:exon:7;SPAC16.02c.1:exon:6;SPAC16.02c.1:exon:5	100	3	0	0	0	0	0	0	0	0	0	0	0	0	0	0	0	0	0	0	0	0	0	0	0	0	0	0	0	0	0	0	0	0	0	0	0	0	0	0	0	0	0	0	0	0	0	0
SPAC637.05c.1:exon:5-SPAC637.05c.1:exon:2	SPAC637.05c.1:exon:4;SPAC637.05c.1:exon:3	121	2	0	0	0	0	0	0	0	0	0	0	0	0	0	0	0	0	0	0	0	0	0	0	0	0	0	0	0	0	0	0	0	0	0	0	0	0	0	0	0	0	0	0	0	0	0	0
SPAC1093.04c.1:exon:3-SPAC1093.04c.1:exon:1	SPAC1093.04c.1:exon:2	614	1	0	0	0	0	0	0	0	0	0	0	0	0	0	0	0	0	0	0	0	0	0	0	0	0	0	0	0	0	0	0	0	0	0	0	0	0	0	0	0	0	0	0	0	0	0	0
SPAC30C2.08.1:exon:1-SPAC30C2.08.1:exon:3	SPAC30C2.08.1:exon:2	736	1	0	0	0	0	0	0	0	0	0	0	0	0	0	0	0	0	0	0	0	0	0	0	0	0	0	0	0	0	0	0	0	0	0	0	0	0	0	0	0	0	0	0	0	0	0	0
SPAC17D4.04.1:exon:2-SPAC17D4.04.1:exon:5	SPAC17D4.04.1:exon:3;SPAC17D4.04.1:exon:4	1929	2	0	0	0	0	0	0	0	0	0	0	0	0	0	0	1	0	0	0	0	0	0	0	0	0	0	0	0	0	0	0	0	0	0	0	0	0	0	1	0	0	0	0	0	0	0	0
SPAPYUG7.04c.1:exon:5-SPAPYUG7.04c.1:exon:3	SPAPYUG7.04c.1:exon:4	67	1	0	0	0	0	0	0	0	0	0	0	0	0	0	0	0	0	0	0	0	0	0	0	0	0	0	0	0	0	2	0	0	0	1	0	0	0	0	0	0	0	0	0	0	0	0	0
SPAC1782.07.1:exon:1-SPAC1782.07.1:exon:4	SPAC1782.07.1:exon:2;SPAC1782.07.1:exon:3	232	2	0	0	0	0	0	0	0	0	0	0	0	0	0	0	0	0	0	0	0	0	0	0	0	0	0	0	0	0	0	0	0	0	0	0	0	0	0	1	0	0	0	0	0	0	0	0
SPAC19B12.06c.1:exon:4-SPAC19B12.06c.1:exon:1	SPAC19B12.06c.1:exon:3;SPAC19B12.06c.1:exon:2	283	2	0	0	0	0	0	0	0	0	0	0	0	0	0	0	0	0	1	0	0	0	0	0	0	0	0	0	0	0	0	0	0	0	0	0	0	0	0	0	0	0	0	0	0	0	0	0
SPAC19B12.10.1:exon:1-SPAC19B12.10.1:exon:4	SPAC19B12.10.1:exon:2;SPAC19B12.10.1:exon:3	1004	2	0	0	0	0	0	0	0	0	0	0	0	0	0	0	0	0	0	0	0	0	0	0	0	0	0	0	0	0	0	0	0	0	0	0	0	0	0	1	1	0	0	0	0	0	1	0
SPAC890.06.1:exon:1-SPAC890.06.1:exon:3	SPAC890.06.1:exon:2	105	1	0	0	0	0	0	0	0	0	0	0	0	0	0	0	0	0	0	0	0	0	0	0	0	0	0	0	0	0	0	0	0	0	0	0	0	0	0	0	0	0	0	0	0	0	0	0
SPAC890.07c.1:exon:9-SPAC890.07c.1:exon:4	SPAC890.07c.1:exon:8;SPAC890.07c.1:exon:7;SPAC890.07c.1:exon:6;SPAC890.07c.1:exon:5	198	4	0	0	0	0	0	0	0	0	0	0	0	0	0	0	0	0	0	0	0	0	0	0	0	0	0	0	0	0	0	0	0	0	0	0	0	0	0	0	0	0	0	0	0	0	0	0
SPAC890.07c.1:exon:6-SPAC890.07c.1:exon:4	SPAC890.07c.1:exon:5	66	1	0	0	0	0	0	0	0	0	0	0	0	0	0	0	0	0	0	0	0	0	0	0	0	0	0	0	0	0	0	0	0	0	0	0	0	0	0	0	0	0	0	0	0	0	0	0
SPAP8A3.09c.1:exon:6-SPAP8A3.09c.1:exon:1	SPAP8A3.09c.1:exon:5;SPAP8A3.09c.1:exon:4;SPAP8A3.09c.1:exon:3;SPAP8A3.09c.1:exon:2	1449	4	0	0	0	0	0	0	0	0	0	0	0	0	0	0	0	0	1	0	0	0	0	0	0	0	0	0	0	0	0	0	0	0	0	0	0	0	0	0	0	0	0	0	0	0	0	0
SPAC1639.02c.1:exon:13-SPAC1639.02c.1:exon:10	SPAC1639.02c.1:exon:12;SPAC1639.02c.1:exon:11	1056	2	0	0	0	0	0	0	0	0	0	0	0	0	0	0	0	0	0	0	0	0	0	0	0	0	0	0	0	0	0	0	0	0	0	0	0	0	0	0	0	0	0	0	0	0	0	0
SPAC12G12.02.1:exon:3-SPAC12G12.02.1:exon:1	SPAC12G12.02.1:exon:2	131	1	0	0	0	0	0	0	0	0	0	0	0	0	0	0	0	0	0	0	0	0	0	0	0	0	0	0	0	0	0	0	0	0	0	0	0	0	0	1	0	0	0	0	0	0	0	0
SPAC227.14.1:five_prime_UTR:1-SPAC227.14.1:exon:2	SPAC227.14.1:exon:1	334	1	0	0	0	0	0	0	0	0	0	0	0	0	0	0	0	0	0	0	0	0	0	0	0	0	0	0	0	0	0	0	0	0	0	0	0	0	0	0	0	0	0	0	0	0	0	0
SPAC1F3.05.1:exon:2-SPAC1F3.05.1:exon:4	SPAC1F3.05.1:exon:3	76	1	0	0	0	0	0	0	0	0	0	0	0	0	0	0	0	0	0	0	0	0	0	0	0	0	0	0	0	0	0	0	0	0	0	0	0	0	0	0	1	0	0	0	0	0	0	0
SPAC1D4.06c.1:exon:3-SPAC1D4.06c.1:exon:1	SPAC1D4.06c.1:exon:2	216	1	0	0	0	0	0	0	0	0	0	0	0	0	0	0	0	0	0	0	0	0	0	0	0	0	0	0	0	0	0	0	0	0	0	0	0	0	0	0	0	0	0	0	0	0	0	0
SPAC22F3.04.1:exon:3-SPAC22F3.04.1:exon:1	SPAC22F3.04.1:exon:2	219	1	0	0	0	0	0	0	0	0	0	0	0	0	0	0	0	0	0	0	0	0	0	0	0	0	0	0	0	0	0	0	0	0	0	0	0	0	0	0	0	0	0	0	0	0	0	0
SPAC4G8.08.1:exon:1-SPAC4G8.08.1:exon:3	SPAC4G8.08.1:exon:2	394	1	0	0	0	0	0	0	0	0	0	0	0	0	0	0	0	0	0	0	0	0	0	0	0	0	0	0	0	0	0	0	0	0	0	0	0	0	0	0	0	1	0	0	0	0	0	0
SPAC23G3.11.1:exon:1-SPAC23G3.11.1:exon:3	SPAC23G3.11.1:exon:2	83	1	0	0	0	0	0	0	0	0	0	0	0	0	0	0	0	0	0	0	0	0	0	0	0	0	0	0	0	0	0	0	0	0	0	0	0	0	0	0	0	0	0	0	0	0	0	0
SPAC30D11.06c.1:exon:1-SPAC30D11.06c.1:exon:3	SPAC30D11.06c.1:exon:2	88	1	0	0	0	0	0	0	0	0	0	0	0	0	0	0	0	0	0	0	0	0	0	0	0	0	0	0	0	0	0	0	0	0	0	0	0	0	0	0	0	0	0	0	0	0	0	0
SPAC10F6.10.1:exon:1-SPAC10F6.10.1:exon:3	SPAC10F6.10.1:exon:2	126	1	0	0	0	0	0	0	0	0	0	0	0	0	1	0	0	0	0	0	0	0	0	0	0	0	0	0	0	0	0	4	0	0	0	0	0	0	0	0	0	0	1	0	0	0	0	0
SPAC6F12.14.1:exon:1-SPAC6F12.14.1:exon:3	SPAC6F12.14.1:exon:2	719	1	0	0	0	0	0	0	0	0	0	0	0	0	0	0	0	0	0	0	0	0	0	0	0	0	0	0	0	0	0	0	0	0	0	0	0	0	0	0	0	0	0	0	0	0	0	0
SPAC19E9.02.1:exon:1-SPAC19E9.02.1:exon:3	SPAC19E9.02.1:exon:2	24	1	0	0	0	0	0	0	0	0	0	0	0	0	0	0	0	0	0	0	0	0	0	0	0	0	0	0	0	0	0	0	0	0	0	0	0	0	0	0	0	1	1	0	0	0	0	0
SPAC57A10.03.1:exon:2-SPAC57A10.03.1:exon:5	SPAC57A10.03.1:exon:3;SPAC57A10.03.1:exon:4	134	2	0	0	0	0	0	0	0	0	0	0	0	0	0	0	0	0	0	0	0	0	0	0	0	0	0	0	0	0	0	0	0	0	0	0	0	0	0	0	0	0	0	0	0	0	0	0
SPAC9.06c.1:exon:3-SPAC9.06c.1:exon:1	SPAC9.06c.1:exon:2	167	1	0	0	0	0	0	0	0	0	0	0	0	0	0	0	0	0	0	0	0	0	0	0	0	0	0	0	0	0	0	0	0	0	0	0	0	0	0	0	0	0	0	0	0	0	0	0
SPAC17A5.16.1:exon:2-SPAC17A5.16.1:exon:4	SPAC17A5.16.1:exon:3	33	1	0	0	0	0	0	0	0	0	0	0	0	0	0	0	0	0	0	0	0	0	0	0	0	0	0	0	0	0	0	0	0	0	0	0	0	0	0	1	0	0	0	0	0	0	0	0
SPAC17A5.16.1:exon:4-SPAC17A5.16.1:exon:7	SPAC17A5.16.1:exon:5;SPAC17A5.16.1:exon:6	586	2	0	0	0	0	0	0	0	0	0	0	0	0	0	0	0	0	0	0	0	0	0	0	0	0	0	0	0	0	0	0	0	0	0	0	0	0	0	1	0	0	0	0	0	0	0	0
SPAC1002.15c.1:exon:3-SPAC1002.15c.1:exon:1	SPAC1002.15c.1:exon:2	83	1	0	0	0	0	0	0	0	0	0	0	0	0	0	0	0	0	0	0	0	0	0	0	0	0	0	0	0	0	0	0	0	0	0	0	0	0	0	0	0	0	0	0	0	0	0	0
SPAC9G1.04.1:exon:1-SPAC9G1.04.1:exon:3	SPAC9G1.04.1:exon:2	751	1	0	0	0	0	0	0	0	0	0	0	0	0	0	0	0	0	0	0	0	0	0	0	0	0	0	0	0	0	0	0	0	0	0	0	0	0	0	0	0	0	0	0	0	0	0	0
SPAC17H9.17c.1:exon:3-SPAC17H9.17c.1:exon:1	SPAC17H9.17c.1:exon:2	395	1	0	0	0	0	0	0	0	0	0	0	0	0	0	0	0	0	0	0	0	0	0	0	0	0	0	0	0	0	0	0	0	0	0	0	0	0	0	0	1	0	0	0	0	0	0	0
SPAC1783.02c.1:exon:4-SPAC1783.02c.1:exon:1	SPAC1783.02c.1:exon:3;SPAC1783.02c.1:exon:2	539	2	0	0	0	0	0	0	0	0	0	0	0	0	0	0	0	0	0	0	0	0	0	0	0	0	0	0	0	0	0	0	0	0	0	0	0	0	0	0	0	0	0	0	0	0	0	0
SPAC13G7.07.1:exon:3-SPAC13G7.07.1:exon:5	SPAC13G7.07.1:exon:4	233	1	0	0	0	0	0	0	0	0	0	0	0	0	0	0	0	0	0	0	0	0	0	0	0	0	0	0	0	0	0	0	0	0	0	0	0	0	0	0	0	0	0	0	0	0	0	0
SPAC13G7.11.1:exon:1-SPAC13G7.11.1:exon:3	SPAC13G7.11.1:exon:2	214	1	0	0	0	0	0	0	0	0	0	0	0	0	0	0	0	0	0	0	0	0	0	0	0	0	0	0	0	0	0	0	0	0	3	0	0	0	0	0	0	0	0	0	0	0	0	0
SPAC17G8.09.1:exon:1-SPAC17G8.09.1:exon:3	SPAC17G8.09.1:exon:2	122	1	0	0	0	0	0	0	0	0	0	0	0	0	0	0	0	0	0	0	0	0	0	0	0	0	0	0	2	0	0	0	0	0	0	0	0	0	0	0	0	0	0	0	0	0	0	0
SPAC19A8.11c.1:exon:2-SPAC19A8.11c.1:exon:4	SPAC19A8.11c.1:exon:3	192	1	0	0	0	0	0	0	0	0	0	0	0	0	0	0	0	0	0	0	0	0	0	0	0	0	0	0	0	0	0	0	0	0	0	0	0	0	0	0	0	0	1	0	0	0	0	0
SPAC19A8.09.1:exon:4-SPAC19A8.09.1:exon:2	SPAC19A8.09.1:exon:3	60	1	0	0	0	0	0	0	0	0	0	0	0	0	0	0	0	0	0	0	0	0	0	0	0	0	0	0	0	0	0	0	0	0	0	0	0	0	0	0	0	0	0	0	0	0	0	0
SPAC7D4.10.1:exon:5-SPAC7D4.10.1:exon:3	SPAC7D4.10.1:exon:4	103	1	0	0	0	0	0	0	0	0	0	0	0	0	0	0	0	0	0	0	0	0	0	0	0	0	0	0	0	0	0	0	0	0	0	0	0	0	0	0	0	0	0	0	0	0	0	0
SPAPB2B4.05.1:exon:1-SPAPB2B4.05.1:exon:4	SPAPB2B4.05.1:exon:2;SPAPB2B4.05.1:exon:3	249	2	0	0	0	0	0	0	0	0	0	0	0	0	0	0	0	0	0	0	0	0	0	0	0	0	0	0	0	0	0	0	0	0	0	0	0	0	0	0	0	0	0	0	0	0	0	0
SPAPB2B4.06.1:exon:1-SPAPB2B4.06.1:exon:3	SPAPB2B4.06.1:exon:2	28	1	0	0	0	0	0	0	0	0	0	0	0	0	0	0	0	0	0	0	0	0	0	0	0	0	0	0	0	0	0	0	0	0	0	0	0	0	0	0	1	0	0	0	0	0	0	0
SPAC6F6.15.1:exon:2-SPAC6F6.15.1:exon:4	SPAC6F6.15.1:exon:3	24	1	0	0	0	0	0	0	0	0	0	0	0	0	0	0	0	0	0	0	0	0	0	0	0	0	0	0	0	0	0	0	0	0	0	0	0	0	0	0	0	0	0	0	0	0	0	0
SPAC1805.15c.1:exon:4-SPAC1805.15c.1:exon:1	SPAC1805.15c.1:exon:3;SPAC1805.15c.1:exon:2	1737	2	0	0	0	0	0	0	0	0	0	0	0	1	0	0	0	0	0	0	0	0	0	0	0	0	0	0	0	0	0	0	0	0	0	0	0	0	0	0	0	0	0	0	0	0	0	1
SPAC31G5.15.1:exon:3-SPAC31G5.15.1:exon:8	SPAC31G5.15.1:exon:4;SPAC31G5.15.1:exon:5;SPAC31G5.15.1:exon:6;SPAC31G5.15.1:exon:7	1829	4	0	0	0	0	0	0	0	0	0	0	0	0	0	0	0	0	0	0	0	0	0	0	0	0	0	0	0	0	0	0	0	0	0	0	0	0	0	0	0	0	0	0	0	0	0	0
SPAC1786.01c.1:exon:4-SPAC1786.01c.1:exon:1	SPAC1786.01c.1:exon:3;SPAC1786.01c.1:exon:2	1553	2	0	0	0	0	0	0	0	0	0	0	0	0	0	0	0	0	0	0	0	0	0	0	0	0	0	0	0	0	0	0	0	0	0	0	0	0	0	0	0	0	0	0	0	0	0	0
SPAC16A10.04.1:exon:1-SPAC16A10.04.1:exon:6	SPAC16A10.04.1:exon:2;SPAC16A10.04.1:exon:3;SPAC16A10.04.1:exon:4;SPAC16A10.04.1:exon:5	428	4	0	0	0	0	0	0	0	0	0	0	0	0	0	0	0	0	0	0	0	0	0	0	0	0	0	0	0	0	0	0	1	0	0	0	0	0	0	0	1	0	0	0	0	0	0	0
SPAC16A10.04.1:exon:3-SPAC16A10.04.1:exon:5	SPAC16A10.04.1:exon:4	204	1	0	0	0	0	0	0	0	0	0	0	0	0	0	0	0	0	0	0	0	0	0	0	0	0	0	0	0	0	0	0	0	0	0	0	0	0	0	0	0	0	0	0	0	0	0	0
SPAC26A3.05.1:exon:1-SPAC26A3.05.1:exon:3	SPAC26A3.05.1:exon:2	74	1	0	0	0	0	0	0	0	0	0	0	0	0	0	0	0	0	0	1	0	0	0	0	0	0	0	0	0	0	0	0	0	0	0	0	0	0	0	0	1	0	0	0	0	0	0	0
SPAC16E8.11c.1:exon:6-SPAC16E8.11c.1:exon:2	SPAC16E8.11c.1:exon:5;SPAC16E8.11c.1:exon:4;SPAC16E8.11c.1:exon:3	934	3	0	0	0	0	0	0	0	0	0	0	0	0	0	0	0	0	0	0	0	0	0	0	0	0	0	0	0	0	0	0	0	0	0	0	0	0	0	0	0	0	0	0	0	0	1	0
SPAC16E8.15.1:exon:1-SPAC16E8.15.1:exon:3	SPAC16E8.15.1:exon:2	175	1	0	0	0	0	0	0	0	0	0	0	0	0	0	0	0	0	0	0	0	0	0	0	0	0	0	0	0	0	0	0	0	0	0	0	0	0	0	0	0	0	0	0	0	0	0	0
SPAC4H3.07c.1:exon:4-SPAC4H3.07c.1:exon:2	SPAC4H3.07c.1:exon:3	52	1	0	0	0	0	0	0	0	0	0	0	0	0	0	0	0	0	0	0	0	0	0	0	0	0	2	0	0	0	0	0	0	0	0	0	0	0	0	0	0	0	0	0	0	0	0	0
SPAPB18E9.01.1:exon:3-SPAPB18E9.01.1:exon:7	SPAPB18E9.01.1:exon:4;SPAPB18E9.01.1:exon:5;SPAPB18E9.01.1:exon:6	839	3	0	0	0	0	0	0	0	0	0	0	0	0	0	0	0	0	0	0	0	0	0	0	0	0	0	0	0	0	0	0	0	0	0	0	0	0	0	0	0	1	0	0	0	0	0	0
SPAPB18E9.01.1:exon:3-SPAPB18E9.01.1:exon:8	SPAPB18E9.01.1:exon:4;SPAPB18E9.01.1:exon:5;SPAPB18E9.01.1:exon:6;SPAPB18E9.01.1:exon:7	920	4	0	0	0	0	0	0	0	0	0	0	0	0	0	0	0	0	0	0	0	0	0	0	0	0	0	0	0	0	0	0	0	0	0	0	0	0	0	0	0	0	0	0	0	0	0	0
SPAC19G12.01c.1:exon:4-SPAC19G12.01c.1:exon:2	SPAC19G12.01c.1:exon:3	123	1	0	0	0	0	0	0	0	0	0	0	0	0	0	0	0	0	0	0	0	0	0	0	0	0	0	0	0	0	0	0	0	0	0	0	0	0	0	0	0	0	0	0	0	0	0	0
SPAC19G12.17.1:exon:6-SPAC19G12.17.1:exon:3	SPAC19G12.17.1:exon:5;SPAC19G12.17.1:exon:4	80	2	0	0	0	0	0	0	0	0	0	0	0	0	0	0	0	0	0	0	1	0	0	0	0	0	0	0	0	0	0	0	0	0	0	0	0	0	0	0	0	0	0	0	0	0	0	0
SPAC26H5.03.1:exon:1-SPAC26H5.03.1:exon:3	SPAC26H5.03.1:exon:2	103	1	0	0	0	0	0	0	0	0	0	0	0	0	0	0	0	0	0	0	0	0	0	0	0	0	0	0	0	0	0	0	0	0	0	0	0	0	0	0	0	0	0	0	0	0	0	0
SPAC1F7.11c.1:exon:3-SPAC1F7.11c.1:exon:1	SPAC1F7.11c.1:exon:2	83	1	0	0	0	0	0	0	0	0	0	0	0	0	0	0	0	0	0	0	0	0	0	0	0	0	0	0	0	0	0	0	0	0	0	0	0	0	0	1	0	0	0	0	0	0	0	0
SPAC29E6.02.1:exon:2-SPAC29E6.02.1:exon:4	SPAC29E6.02.1:exon:3	660	1	0	0	0	0	0	0	0	0	0	0	0	0	0	0	0	0	0	0	0	0	0	0	0	0	0	0	0	0	0	0	0	0	0	0	0	0	0	0	1	0	0	0	0	0	0	0
SPAC16.01.1:exon:2-SPAC16.01.1:exon:8	SPAC16.01.1:exon:3;SPAC16.01.1:exon:4;SPAC16.01.1:exon:5;SPAC16.01.1:exon:6;SPAC16.01.1:exon:7	198	5	0	0	0	0	0	0	0	0	0	0	0	0	0	0	0	0	0	0	0	0	0	0	0	0	0	0	0	0	0	0	0	0	0	0	0	0	0	0	0	0	0	0	0	0	0	0
SPAC12B10.05.1:exon:7-SPAC12B10.05.1:exon:11	SPAC12B10.05.1:exon:8;SPAC12B10.05.1:exon:9;SPAC12B10.05.1:exon:10	684	3	0	0	0	0	0	0	0	0	0	0	0	0	0	0	0	0	0	0	0	0	0	0	0	0	0	0	0	0	0	0	0	0	0	0	0	0	0	1	0	0	0	0	0	0	0	0
SPAC144.05.1:exon:2-SPAC144.05.1:exon:4	SPAC144.05.1:exon:3	200	1	0	0	0	0	0	0	0	0	0	0	0	0	0	0	0	0	0	0	0	0	0	0	0	0	0	0	0	0	0	0	0	0	0	0	0	0	0	0	0	0	1	0	0	0	0	0
SPAC20G4.06c.1:exon:3-SPAC20G4.06c.1:exon:1	SPAC20G4.06c.1:exon:2	106	1	0	0	0	0	0	0	0	0	0	0	0	0	0	0	0	0	0	0	0	0	0	0	0	0	0	0	0	0	0	0	0	0	0	0	0	0	0	1	0	0	0	0	0	0	0	0
SPAC1B3.02c.1:exon:4-SPAC1B3.02c.1:exon:1	SPAC1B3.02c.1:exon:3;SPAC1B3.02c.1:exon:2	118	2	0	0	0	0	0	0	0	0	0	0	0	0	0	0	0	0	0	0	0	0	0	0	0	0	0	0	0	0	0	0	0	0	0	0	0	0	0	0	0	0	1	0	0	0	0	0
SPAC1952.02.1:exon:1-SPAC1952.02.1:exon:3	SPAC1952.02.1:exon:2	93	1	0	0	0	0	0	0	0	0	0	0	0	0	0	0	0	0	0	0	0	0	0	0	0	0	0	0	0	0	3	1	0	0	0	0	0	0	1	0	0	0	0	0	0	0	0	0
SPAC1952.04c.1:exon:3-SPAC1952.04c.1:exon:1	SPAC1952.04c.1:exon:2	71	1	0	0	0	0	0	0	0	0	0	0	0	0	0	0	0	0	0	0	0	0	0	0	0	0	0	0	0	0	0	0	0	0	0	0	0	0	0	0	0	0	0	0	0	0	0	0
SPBC106.13.1:exon:1-SPBC106.13.1:exon:3	SPBC106.13.1:exon:2	522	1	0	0	0	0	0	0	0	0	0	0	0	0	0	0	0	0	0	0	0	0	0	0	0	0	0	0	0	0	0	0	0	0	0	0	0	0	0	0	0	0	0	0	0	0	0	0
SPBC582.09.1:exon:1-SPBC582.09.1:exon:3	SPBC582.09.1:exon:2	30	1	0	0	0	0	0	0	0	0	0	0	0	0	0	0	0	0	0	0	0	0	0	0	0	0	0	0	0	0	0	0	0	0	0	0	0	0	0	0	0	0	0	0	0	0	0	0
SPBC428.01c.1:exon:7-SPBC428.01c.1:exon:1	SPBC428.01c.1:exon:6;SPBC428.01c.1:exon:5;SPBC428.01c.1:exon:4;SPBC428.01c.1:exon:3;SPBC428.01c.1:exon:2	411	5	0	0	0	0	0	0	0	0	0	0	0	0	0	0	0	0	0	0	0	0	0	0	0	0	0	0	0	0	0	0	0	0	0	0	0	0	0	0	0	1	1	0	0	0	0	0
SPBC119.08.1:exon:1-SPBC119.08.1:exon:4	SPBC119.08.1:exon:2;SPBC119.08.1:exon:3	252	2	0	0	0	0	0	0	0	0	0	0	0	0	0	0	0	0	0	0	0	0	0	0	0	0	0	0	0	0	0	0	0	0	0	0	0	0	0	0	0	0	0	0	0	0	0	0
SPBC36.05c.1:exon:12-SPBC36.05c.1:exon:10	SPBC36.05c.1:exon:11	118	1	0	0	0	0	0	0	0	0	0	0	0	0	0	0	0	0	0	0	0	0	0	0	0	0	0	0	0	0	0	0	0	0	0	0	0	0	0	0	0	0	0	0	0	0	0	0
SPBC36.05c.1:exon:9-SPBC36.05c.1:exon:7	SPBC36.05c.1:exon:8	46	1	0	0	0	0	0	0	0	0	0	0	0	0	0	0	0	0	0	0	0	0	0	0	0	0	0	0	0	0	0	0	0	0	0	0	0	0	0	0	0	0	0	0	0	0	0	0
SPBC36.05c.1:exon:9-SPBC36.05c.1:exon:5	SPBC36.05c.1:exon:8;SPBC36.05c.1:exon:7;SPBC36.05c.1:exon:6	374	3	0	0	0	0	0	0	0	0	0	0	0	0	0	0	0	0	0	0	0	0	0	0	0	0	0	0	0	0	0	0	0	0	0	0	0	0	0	0	0	0	0	0	0	0	0	0
SPBC36.05c.1:exon:7-SPBC36.05c.1:exon:4	SPBC36.05c.1:exon:6;SPBC36.05c.1:exon:5	202	2	0	0	0	0	0	0	0	0	0	0	0	0	0	0	0	0	0	0	0	0	0	0	0	0	0	0	0	0	0	0	0	0	0	0	0	0	0	0	0	1	1	0	0	0	0	0
SPBC646.04.1:exon:1-SPBC646.04.1:exon:4	SPBC646.04.1:exon:2;SPBC646.04.1:exon:3	212	2	0	0	0	0	0	0	0	0	0	0	0	0	0	0	0	0	0	0	0	0	0	0	0	0	0	0	0	0	0	0	0	0	0	0	0	0	0	0	0	0	0	0	0	0	0	0
SPBP35G2.05c.1:exon:4-SPBP35G2.05c.1:exon:2	SPBP35G2.05c.1:exon:3	70	1	0	0	0	0	0	0	0	0	0	0	0	0	0	0	0	0	0	0	0	0	0	0	0	0	0	0	0	0	0	0	0	0	0	0	0	0	0	0	0	0	0	0	0	0	0	0
SPBC3D6.15.1:exon:1-SPBC3D6.15.1:exon:3	SPBC3D6.15.1:exon:2	241	1	0	0	0	0	0	0	0	0	0	0	0	0	0	0	0	0	0	0	0	0	0	0	0	0	0	0	0	0	0	0	0	0	0	0	0	0	0	0	0	0	0	0	0	0	1	0
SPBC8D2.02c.1:exon:3-SPBC8D2.02c.1:exon:1	SPBC8D2.02c.1:exon:2	125	1	0	0	0	0	0	0	0	0	0	0	0	0	0	0	0	0	0	0	0	0	0	0	0	0	0	0	0	0	0	0	0	0	0	0	0	0	0	0	1	0	0	0	0	0	0	0
SPBC28F2.12.1:exon:3-SPBC28F2.12.1:exon:6	SPBC28F2.12.1:exon:4;SPBC28F2.12.1:exon:5	136	2	0	0	0	0	0	0	0	0	0	0	0	0	0	0	0	0	0	0	0	0	0	0	0	0	0	0	0	0	0	0	0	3	0	0	0	0	0	0	0	0	0	0	0	0	1	0
SPBC28F2.12.1:exon:3-SPBC28F2.12.1:exon:7	SPBC28F2.12.1:exon:4;SPBC28F2.12.1:exon:5;SPBC28F2.12.1:exon:6	243	3	0	0	0	0	0	0	0	0	0	0	0	0	0	0	0	0	0	0	0	0	0	0	0	0	0	0	0	0	0	0	0	0	0	0	0	0	0	0	0	0	0	0	0	0	0	0
SPBC1D7.01.1:exon:2-SPBC1D7.01.1:three_prime_UTR:1	SPBC1D7.01.1:exon:1	407	1	0	0	0	0	0	0	0	0	0	0	0	0	0	0	0	0	0	0	0	0	0	0	0	0	0	0	0	0	0	0	0	0	0	0	0	0	0	0	0	1	0	0	0	0	0	0
SPBC9B6.07.1:exon:1-SPBC9B6.07.1:exon:4	SPBC9B6.07.1:exon:2;SPBC9B6.07.1:exon:3	397	2	0	0	0	0	0	0	0	0	0	0	0	0	0	0	0	0	0	0	0	0	0	0	0	0	0	0	0	0	0	0	0	0	0	0	0	0	0	0	0	0	0	0	0	0	0	0
SPBC9B6.10.1:exon:1-SPBC9B6.10.1:exon:3	SPBC9B6.10.1:exon:2	27	1	0	0	0	0	0	0	0	0	0	0	0	1	0	0	0	0	0	0	0	0	0	0	0	0	0	0	0	0	0	0	0	0	0	0	0	0	0	0	0	0	0	0	0	0	0	0
SPBC9B6.10.1:exon:2-SPBC9B6.10.1:exon:4	SPBC9B6.10.1:exon:3	11	1	0	0	0	0	0	0	0	0	0	0	0	0	0	0	0	0	0	0	0	0	0	0	0	0	0	0	0	0	0	0	0	0	0	0	0	0	0	0	0	0	0	0	0	0	0	0
SPBC29A3.14c.1:exon:15-SPBC29A3.14c.1:exon:4	SPBC29A3.14c.1:exon:14;SPBC29A3.14c.1:exon:13;SPBC29A3.14c.1:exon:12;SPBC29A3.14c.1:exon:11;SPBC29A3.14c.1:exon:10;SPBC29A3.14c.1:exon:9;SPBC29A3.14c.1:exon:8;SPBC29A3.14c.1:exon:7;SPBC29A3.14c.1:exon:6;SPBC29A3.14c.1:exon:5	1951	10	0	0	0	0	0	0	0	0	0	0	0	0	0	0	0	0	0	0	0	0	0	0	0	0	0	0	0	0	0	0	0	0	0	0	0	0	0	0	0	0	0	0	0	0	0	0
SPBC29A3.14c.1:exon:5-SPBC29A3.14c.1:exon:3	SPBC29A3.14c.1:exon:4	250	1	0	0	0	0	0	0	0	0	0	0	0	0	0	0	0	0	0	0	0	0	0	0	0	0	0	0	0	0	0	0	0	0	0	0	0	0	0	0	0	0	0	0	0	0	0	0
SPBC29A3.14c.1:exon:4-SPBC29A3.14c.1:exon:2	SPBC29A3.14c.1:exon:3	167	1	0	0	0	0	0	0	0	0	0	0	0	0	0	0	0	0	0	0	0	0	0	0	0	0	0	0	0	0	0	0	0	0	0	0	0	0	0	0	0	0	0	0	0	0	0	0
SPBC14C8.04.1:exon:1-SPBC14C8.04.1:exon:4	SPBC14C8.04.1:exon:2;SPBC14C8.04.1:exon:3	332	2	0	0	0	0	0	0	0	0	0	0	0	0	0	0	0	0	0	0	0	0	0	0	0	0	0	0	0	0	0	0	0	0	0	0	0	0	0	0	0	0	0	0	0	0	0	0
SPBC15C4.01c.1:exon:5-SPBC15C4.01c.1:exon:1	SPBC15C4.01c.1:exon:4;SPBC15C4.01c.1:exon:3;SPBC15C4.01c.1:exon:2	489	3	0	0	0	0	0	0	0	0	0	0	0	0	0	0	0	0	0	0	0	0	0	0	0	0	0	0	2	0	0	0	0	0	0	0	0	0	0	0	0	0	0	0	0	0	0	0
SPBC16H5.03c.1:exon:1-SPBC16H5.03c.1:exon:4	SPBC16H5.03c.1:exon:2;SPBC16H5.03c.1:exon:3	1140	2	0	0	0	0	0	0	0	0	0	0	0	0	0	0	0	0	0	0	0	0	0	0	0	0	0	0	0	0	0	0	0	0	0	0	0	0	0	1	0	0	0	0	0	0	0	1
SPBC12D12.06.1:exon:1-SPBC12D12.06.1:exon:4	SPBC12D12.06.1:exon:2;SPBC12D12.06.1:exon:3	447	2	0	0	0	0	0	0	0	0	0	0	0	0	0	0	0	0	0	0	0	0	0	0	0	0	0	0	0	0	0	0	0	0	0	0	0	0	0	0	0	0	0	0	0	0	0	0
SPBC19G7.17.1:exon:3-SPBC19G7.17.1:exon:6	SPBC19G7.17.1:exon:4;SPBC19G7.17.1:exon:5	167	2	0	0	0	0	0	0	0	0	0	0	0	0	0	0	0	0	0	0	0	0	0	0	0	0	0	0	0	0	0	0	0	0	0	0	0	0	0	0	0	0	0	0	0	0	0	0
SPBC29A10.14.1:exon:2-SPBC29A10.14.1:exon:4	SPBC29A10.14.1:exon:3	97	1	0	0	0	0	0	0	0	0	0	0	0	0	0	0	0	0	0	0	0	0	0	0	0	0	0	0	0	0	0	0	0	0	0	0	0	0	0	0	0	0	0	0	0	0	0	0
SPBC32F12.04.1:exon:2-SPBC32F12.04.1:exon:6	SPBC32F12.04.1:exon:3;SPBC32F12.04.1:exon:4;SPBC32F12.04.1:exon:5	996	3	0	0	0	0	0	0	0	0	0	0	0	0	0	0	0	0	0	0	0	0	0	0	0	0	0	0	0	0	0	0	0	0	0	0	0	0	0	0	1	0	0	0	0	0	0	0
SPBC1703.08c.1:exon:4-SPBC1703.08c.1:exon:2	SPBC1703.08c.1:exon:3	129	1	0	0	0	0	0	0	0	0	0	0	0	0	0	0	0	0	0	0	0	0	0	0	0	0	0	0	0	0	0	0	0	0	0	0	0	0	0	0	0	0	1	0	0	0	0	0
SPBC2D10.16.1:exon:1-SPBC2D10.16.1:exon:3	SPBC2D10.16.1:exon:2	179	1	0	0	0	0	0	0	0	0	0	0	0	0	0	0	0	0	0	0	0	0	0	0	0	0	0	0	0	0	0	0	0	0	0	0	0	0	0	0	1	0	0	0	0	0	0	0
SPBC1778.04.1:exon:2-SPBC1778.04.1:exon:4	SPBC1778.04.1:exon:3	722	1	0	0	0	0	0	0	0	0	0	0	0	0	0	0	0	0	0	0	0	0	0	0	0	0	0	0	0	0	0	0	0	0	0	0	0	0	0	0	0	0	0	0	0	0	0	0
SPBC4C3.10c.1:exon:1-SPBC4C3.10c.1:exon:4	SPBC4C3.10c.1:exon:2;SPBC4C3.10c.1:exon:3	216	2	0	0	0	0	0	0	0	0	0	0	0	0	0	0	0	0	0	0	0	0	0	0	0	0	0	0	0	0	0	0	0	0	0	0	0	0	0	0	0	0	0	0	0	0	0	0
SPBC25H2.14.1:exon:6-SPBC25H2.14.1:exon:3	SPBC25H2.14.1:exon:5;SPBC25H2.14.1:exon:4	82	2	0	0	0	0	0	0	0	0	0	0	0	0	0	0	0	0	0	0	0	0	0	0	0	0	0	0	0	0	0	0	0	0	0	0	0	0	0	0	0	0	0	0	0	0	0	0
SPBC25H2.11c.1:exon:1-SPBC25H2.11c.1:exon:5	SPBC25H2.11c.1:exon:2;SPBC25H2.11c.1:exon:3;SPBC25H2.11c.1:exon:4	341	3	0	0	0	0	0	0	0	0	0	0	0	0	0	0	0	0	0	0	0	0	0	0	0	0	0	0	0	0	0	0	0	0	0	0	0	0	0	0	0	0	0	0	0	0	0	0
SPBC25H2.11c.1:exon:1-SPBC25H2.11c.1:exon:9	SPBC25H2.11c.1:exon:2;SPBC25H2.11c.1:exon:3;SPBC25H2.11c.1:exon:4;SPBC25H2.11c.1:exon:5;SPBC25H2.11c.1:exon:6;SPBC25H2.11c.1:exon:7;SPBC25H2.11c.1:exon:8	2083	7	0	0	0	0	0	0	0	0	0	0	0	0	0	0	0	0	0	0	0	0	0	0	0	0	0	0	0	0	0	0	0	0	0	0	0	0	0	0	1	0	0	0	0	0	0	0
SPBC25H2.11c.1:exon:2-SPBC25H2.11c.1:exon:4	SPBC25H2.11c.1:exon:3	39	1	0	0	0	0	0	0	0	0	0	0	0	0	0	0	0	0	0	0	0	0	0	0	0	0	0	0	0	0	0	0	0	0	0	0	0	0	0	0	0	0	0	0	0	0	0	0
SPBC25H2.11c.1:exon:6-SPBC25H2.11c.1:exon:8	SPBC25H2.11c.1:exon:7	144	1	0	0	0	0	0	0	0	0	0	0	0	0	0	0	0	0	0	0	0	0	0	0	0	0	0	0	0	0	0	0	0	0	0	0	0	0	0	0	0	0	0	0	0	0	0	0
SPBC25H2.03.1:exon:7-SPBC25H2.03.1:exon:1	SPBC25H2.03.1:exon:6;SPBC25H2.03.1:exon:5;SPBC25H2.03.1:exon:4;SPBC25H2.03.1:exon:3;SPBC25H2.03.1:exon:2	1913	5	0	0	0	0	0	0	0	0	0	0	0	0	0	0	0	0	0	0	0	0	0	0	0	0	0	0	0	0	0	0	0	0	0	0	0	0	0	0	0	0	0	0	0	0	0	0
SPBC25H2.03.1:exon:5-SPBC25H2.03.1:exon:2	SPBC25H2.03.1:exon:4;SPBC25H2.03.1:exon:3	221	2	0	0	0	0	0	0	0	0	0	0	0	0	0	0	0	0	0	1	0	0	0	0	0	0	0	0	0	0	0	0	0	0	0	0	0	0	0	0	0	0	0	0	0	0	0	0
SPBC17D1.02.1:exon:2-SPBC17D1.02.1:exon:4	SPBC17D1.02.1:exon:3	679	1	0	0	0	0	0	0	0	0	0	0	0	0	0	0	0	0	0	0	0	0	0	0	0	0	0	0	0	0	0	0	0	0	0	0	0	0	0	0	0	0	0	0	0	0	0	0
SPBC11C11.04c.1:exon:5-SPBC11C11.04c.1:exon:3	SPBC11C11.04c.1:exon:4	383	1	0	0	0	0	0	0	0	0	0	0	0	0	0	0	0	0	0	0	0	0	0	0	0	0	0	0	0	0	0	0	0	0	0	0	0	0	0	0	0	0	0	0	0	0	0	0
SPBP8B7.31.1:exon:1-SPBP8B7.31.1:exon:4	SPBP8B7.31.1:exon:2;SPBP8B7.31.1:exon:3	372	2	0	0	0	0	0	0	0	0	0	0	0	1	0	0	0	0	0	0	0	0	0	0	0	0	0	0	0	0	0	0	0	0	0	0	0	0	0	0	0	0	0	0	0	0	0	0
SPBC31F10.12.1:exon:1-SPBC31F10.12.1:exon:4	SPBC31F10.12.1:exon:2;SPBC31F10.12.1:exon:3	251	2	0	0	0	0	0	0	0	0	0	0	0	0	0	0	0	0	0	0	0	0	0	0	0	0	0	0	0	0	0	0	0	0	0	0	0	0	0	0	0	0	0	0	0	0	0	0
SPBC31F10.12.1:exon:4-SPBC31F10.12.1:exon:6	SPBC31F10.12.1:exon:5	58	1	0	0	0	0	0	0	0	0	0	0	0	0	0	0	0	0	0	0	0	0	0	0	0	0	0	0	0	0	0	0	0	0	0	0	0	0	0	1	0	0	0	0	0	0	0	0
SPBC215.02.1:exon:1-SPBC215.02.1:exon:3	SPBC215.02.1:exon:2	110	1	0	0	0	0	0	0	0	0	0	0	0	0	0	0	0	0	0	0	0	0	0	0	0	0	0	0	0	0	0	0	0	0	0	0	0	0	0	0	0	0	0	0	0	0	0	0
SPBC16G5.09.1:exon:1-SPBC16G5.09.1:exon:3	SPBC16G5.09.1:exon:2	699	1	0	0	0	0	0	0	0	0	0	0	0	0	0	0	0	0	0	0	0	0	0	0	0	0	0	0	0	0	0	0	0	0	0	0	0	0	0	0	0	0	0	0	0	0	0	0
SPBC543.10.1:exon:1-SPBC543.10.1:exon:3	SPBC543.10.1:exon:2	367	1	0	0	0	0	0	0	0	0	0	0	0	0	0	0	0	0	0	0	0	0	0	0	0	0	0	0	0	0	0	0	0	0	0	0	0	0	0	0	0	0	0	0	0	0	0	0
SPBC1198.04c.1:exon:3-SPBC1198.04c.1:exon:1	SPBC1198.04c.1:exon:2	636	1	0	0	0	0	0	0	0	0	0	0	0	0	0	0	0	0	0	0	0	0	0	0	0	0	0	0	0	0	0	0	0	0	0	0	0	0	0	0	0	0	0	0	0	0	0	0
SPBC660.11.1:exon:1-SPBC660.11.1:exon:3	SPBC660.11.1:exon:2	202	1	0	0	0	0	0	0	0	0	0	0	0	0	0	0	0	0	0	0	0	0	0	0	0	0	0	0	1	0	0	0	0	0	0	0	1	0	0	0	0	0	0	0	0	0	0	0
SPBC800.09.1:exon:1-SPBC800.09.1:exon:3	SPBC800.09.1:exon:2	59	1	0	0	0	0	0	0	0	0	0	0	0	0	0	0	0	0	0	0	0	0	0	0	0	0	0	0	0	0	0	0	0	0	0	0	0	0	0	1	0	0	0	0	0	0	1	0
SPBC1773.07c.1:exon:3-SPBC1773.07c.1:exon:1	SPBC1773.07c.1:exon:2	129	1	0	0	0	0	0	0	0	0	0	0	0	0	0	0	0	0	0	0	0	0	0	0	0	0	0	0	0	0	0	0	0	0	0	0	0	0	0	0	0	0	0	0	0	0	0	0
SPBC1271.12.1:exon:6-SPBC1271.12.1:exon:2	SPBC1271.12.1:exon:5;SPBC1271.12.1:exon:4;SPBC1271.12.1:exon:3	228	3	0	0	0	0	0	0	0	0	0	0	0	0	0	0	0	0	0	0	0	0	0	0	0	0	0	0	0	0	0	0	0	0	0	0	0	0	0	0	0	0	0	0	0	0	0	0
SPBC1271.12.1:exon:4-SPBC1271.12.1:exon:1	SPBC1271.12.1:exon:3;SPBC1271.12.1:exon:2	436	2	0	0	0	0	0	0	0	0	0	0	0	0	0	0	0	0	0	0	0	0	0	0	0	0	0	0	0	0	0	0	0	0	0	0	0	0	0	0	0	0	1	0	0	0	0	0
SPBC1271.12.1:exon:2-SPBC1271.12.1:three_prime_UTR:1	SPBC1271.12.1:exon:1	806	1	0	0	0	0	0	0	0	0	0	0	0	0	0	0	1	0	0	0	0	0	0	0	0	0	0	0	0	0	0	0	0	0	0	0	0	0	0	0	0	0	0	0	0	0	0	0
SPBC106.12c.1:exon:5-SPBC106.12c.1:exon:3	SPBC106.12c.1:exon:4	69	1	0	0	0	0	0	0	0	0	0	0	0	0	0	0	0	0	0	0	0	0	0	0	0	0	0	0	0	0	0	0	0	0	0	0	0	0	0	2	0	0	0	0	0	0	0	0
SPBC582.04c.1:exon:6-SPBC582.04c.1:exon:4	SPBC582.04c.1:exon:5	269	1	0	0	0	0	0	0	0	0	0	0	0	0	0	0	0	0	0	0	0	0	0	0	0	0	0	0	0	0	0	0	0	0	0	0	0	0	0	0	0	0	0	0	0	0	0	0
SPBC582.04c.1:exon:6-SPBC582.04c.1:exon:1	SPBC582.04c.1:exon:5;SPBC582.04c.1:exon:4;SPBC582.04c.1:exon:3;SPBC582.04c.1:exon:2	891	4	0	0	0	0	0	0	0	0	0	0	0	0	0	0	0	0	0	0	0	0	0	0	0	0	0	0	0	0	0	0	0	0	0	0	0	0	0	0	0	0	1	0	0	0	0	0
SPBC582.05c.1:exon:3-SPBC582.05c.1:exon:1	SPBC582.05c.1:exon:2	138	1	0	0	0	0	0	0	0	0	0	0	0	0	0	0	0	0	0	0	0	0	0	0	0	0	0	0	0	0	0	0	0	0	0	0	0	0	0	0	0	0	0	0	0	0	0	0
SPBC428.12c.1:exon:3-SPBC428.12c.1:exon:1	SPBC428.12c.1:exon:2	159	1	0	0	0	0	0	0	0	0	0	0	0	0	0	0	0	1	0	0	0	0	0	0	0	0	0	0	0	0	0	0	0	0	0	0	0	0	0	0	0	0	0	0	0	0	0	0
SPBC1685.03.1:exon:1-SPBC1685.03.1:exon:3	SPBC1685.03.1:exon:2	314	1	0	0	0	0	0	0	0	0	0	0	0	0	0	0	0	0	0	0	0	0	0	0	0	0	0	0	0	0	0	0	0	0	0	0	0	0	0	0	0	0	0	0	0	0	0	0
SPBC354.02c.1:exon:6-SPBC354.02c.1:exon:1	SPBC354.02c.1:exon:5;SPBC354.02c.1:exon:4;SPBC354.02c.1:exon:3;SPBC354.02c.1:exon:2	348	4	0	0	0	0	0	0	0	0	0	0	0	0	0	0	0	0	0	0	0	0	0	0	0	0	0	0	0	0	0	0	0	0	0	0	0	0	0	0	0	0	0	0	0	0	0	0
SPBC354.14c.1:exon:5-SPBC354.14c.1:exon:2	SPBC354.14c.1:exon:4;SPBC354.14c.1:exon:3	481	2	0	0	0	0	0	0	0	0	0	0	0	0	0	0	0	0	0	0	0	0	0	0	0	0	0	0	0	0	0	0	0	0	0	0	0	0	0	0	0	0	0	0	0	0	0	0
SPBC119.15.1:exon:1-SPBC119.15.1:exon:3	SPBC119.15.1:exon:2	154	1	0	0	0	0	0	0	0	0	0	0	0	0	0	0	0	0	0	0	0	0	0	0	0	0	0	0	0	0	0	0	0	0	0	0	0	0	0	0	1	0	0	0	0	0	0	0
SPBC577.09.1:exon:2-SPBC577.09.1:exon:4	SPBC577.09.1:exon:3	108	1	0	0	0	0	0	0	0	0	0	0	0	0	0	0	0	0	0	0	0	0	0	0	0	0	0	0	0	0	0	0	0	0	0	0	0	0	0	0	1	0	0	0	0	0	0	0
SPBC337.05c.1:exon:4-SPBC337.05c.1:exon:2	SPBC337.05c.1:exon:3	40	1	0	0	0	0	0	0	0	0	0	0	0	0	0	0	0	0	0	0	0	0	0	0	0	0	0	0	0	0	0	0	0	0	0	0	0	0	0	0	1	0	0	0	0	0	0	0
SPBC1709.14.1:exon:1-SPBC1709.14.1:exon:4	SPBC1709.14.1:exon:2;SPBC1709.14.1:exon:3	337	2	0	0	0	0	0	0	0	0	0	0	0	0	0	0	0	0	0	0	0	0	0	0	0	0	0	0	0	0	0	0	0	0	0	0	0	0	0	0	0	0	0	0	0	0	0	0
SPBC725.10.1:five_prime_UTR:1-SPBC725.10.1:exon:1	SPBC725.10.1:five_prime_UTR:2	37	1	0	0	0	0	0	0	0	0	0	0	0	0	0	0	0	0	0	0	0	0	0	0	0	0	0	0	0	0	0	0	0	0	0	0	0	0	0	0	0	0	0	0	0	0	0	0
SPBC17A3.03c.1:exon:4-SPBC17A3.03c.1:exon:1	SPBC17A3.03c.1:exon:3;SPBC17A3.03c.1:exon:2	163	2	0	0	0	0	0	0	0	0	0	0	0	0	0	0	0	0	0	0	0	0	0	0	0	0	0	0	0	0	0	0	0	0	0	0	0	0	0	0	0	0	0	0	0	0	0	0
SPBC21B10.09.1:exon:4-SPBC21B10.09.1:exon:2	SPBC21B10.09.1:exon:3	657	1	0	0	0	0	0	0	0	0	0	0	0	0	0	0	0	0	0	0	0	0	0	0	0	0	0	0	0	0	0	0	0	0	0	0	0	0	0	0	0	0	0	0	0	0	0	0
SPBC17G9.08c.1:exon:6-SPBC17G9.08c.1:exon:3	SPBC17G9.08c.1:exon:5;SPBC17G9.08c.1:exon:4	317	2	0	0	0	0	0	0	0	0	0	0	0	0	0	0	0	0	0	0	0	0	0	0	0	0	0	0	0	0	0	0	0	0	0	0	0	0	0	0	0	0	0	0	0	0	0	0
SPBC14C8.15.1:exon:1-SPBC14C8.15.1:exon:3	SPBC14C8.15.1:exon:2	117	1	0	0	0	0	0	0	0	0	0	0	0	0	0	0	0	0	0	0	0	0	0	0	0	0	0	0	0	0	0	0	0	0	0	0	0	0	0	0	1	0	2	0	0	0	1	0
SPBC19G7.02.1:five_prime_UTR:1-SPBC19G7.02.1:exon:2	SPBC19G7.02.1:exon:1	178	1	0	0	0	0	0	0	0	0	0	0	0	0	0	0	0	0	0	0	0	0	0	0	0	0	0	0	0	0	0	0	0	0	0	0	0	0	0	0	0	0	0	0	0	0	0	0
SPBC19G7.02.1:exon:1-SPBC19G7.02.1:exon:3	SPBC19G7.02.1:exon:2	307	1	0	0	0	0	0	0	0	0	0	0	0	0	0	0	0	0	0	0	0	0	0	0	0	0	0	0	0	0	0	0	0	0	0	0	0	0	0	0	0	0	0	0	0	0	0	0
SPBC19G7.06.1:exon:1-SPBC19G7.06.1:exon:3	SPBC19G7.06.1:exon:2	147	1	0	0	0	0	0	0	0	0	0	0	0	0	0	0	0	0	0	0	0	0	0	0	0	0	0	0	0	0	0	0	0	0	0	0	0	0	0	0	0	0	0	0	0	0	0	0
SPBC19G7.06.1:exon:1-SPBC19G7.06.1:exon:4	SPBC19G7.06.1:exon:2;SPBC19G7.06.1:exon:3	231	2	0	0	0	0	0	0	0	0	0	0	0	0	0	0	0	0	0	0	0	0	0	0	0	0	0	0	0	0	0	0	0	0	0	0	0	0	0	0	0	0	0	0	0	0	0	0
SPBC19G7.06.1:exon:2-SPBC19G7.06.1:exon:4	SPBC19G7.06.1:exon:3	84	1	0	0	0	0	0	0	0	0	0	0	0	0	0	0	0	0	0	0	0	0	0	0	0	4	0	0	0	0	0	0	0	0	0	0	0	0	0	0	0	0	0	0	0	0	0	0
SPBC36B7.08c.1:exon:4-SPBC36B7.08c.1:exon:1	SPBC36B7.08c.1:exon:3;SPBC36B7.08c.1:exon:2	627	2	0	0	0	0	0	0	0	0	0	0	0	0	0	0	0	0	0	0	0	0	0	0	0	0	0	0	0	0	0	0	0	0	0	0	0	0	0	0	0	0	1	0	0	0	0	0
SPBC365.06.1:exon:1-SPBC365.06.1:three_prime_UTR:2	SPBC365.06.1:exon:2;SPBC365.06.1:exon:3	2960	2	0	0	0	0	0	0	0	0	0	0	0	0	0	0	0	0	0	0	0	0	0	0	0	0	0	0	0	0	0	0	0	0	0	0	0	0	0	0	0	0	0	0	0	0	0	0
SPBC336.14c.1:exon:8-SPBC336.14c.1:exon:5	SPBC336.14c.1:exon:7;SPBC336.14c.1:exon:6	295	2	0	0	0	0	0	0	0	0	0	0	0	0	0	0	0	0	0	0	0	0	0	0	0	0	0	0	0	0	0	0	0	0	0	0	0	0	0	0	1	0	0	0	0	0	0	0
SPBC336.14c.1:exon:7-SPBC336.14c.1:exon:3	SPBC336.14c.1:exon:6;SPBC336.14c.1:exon:5;SPBC336.14c.1:exon:4	487	3	0	0	0	0	0	0	0	0	0	0	0	0	0	0	0	0	0	0	0	0	0	0	0	0	0	0	0	0	0	0	0	0	0	0	0	0	0	0	0	0	0	0	0	0	0	0
SPBC336.14c.1:exon:7-SPBC336.14c.1:exon:2	SPBC336.14c.1:exon:6;SPBC336.14c.1:exon:5;SPBC336.14c.1:exon:4;SPBC336.14c.1:exon:3	1019	4	0	0	0	0	0	0	0	0	0	0	0	0	0	0	0	0	0	0	0	0	0	0	0	0	0	0	0	0	0	0	0	0	0	0	0	0	0	1	0	0	0	0	0	0	0	0
SPBC336.14c.1:exon:3-SPBC336.14c.1:exon:1	SPBC336.14c.1:exon:2	78	1	0	0	0	0	0	0	0	0	0	0	0	0	0	0	0	0	0	0	0	0	0	0	0	0	0	0	0	0	0	0	0	0	0	0	0	0	0	0	0	0	0	0	0	0	0	0
SPBC2A9.07c.1:exon:4-SPBC2A9.07c.1:exon:1	SPBC2A9.07c.1:exon:3;SPBC2A9.07c.1:exon:2	658	2	0	0	0	0	0	0	0	0	0	0	0	0	0	0	0	0	0	0	0	0	0	0	0	0	0	0	0	0	0	0	0	0	0	0	0	0	0	0	0	0	0	0	0	0	0	0
SPBC2D10.20.1:exon:1-SPBC2D10.20.1:exon:4	SPBC2D10.20.1:exon:2;SPBC2D10.20.1:exon:3	105	2	0	0	0	0	0	0	0	0	0	0	0	0	0	0	0	0	0	0	0	0	0	0	0	0	0	0	0	0	0	0	0	0	0	0	0	0	0	0	0	0	0	0	0	0	0	0
SPBC2D10.20.1:exon:3-SPBC2D10.20.1:exon:6	SPBC2D10.20.1:exon:4;SPBC2D10.20.1:exon:5	36	2	0	0	0	0	0	0	0	0	0	0	0	0	0	0	0	0	0	0	0	0	0	0	0	0	0	0	0	0	0	0	0	0	0	0	0	0	0	0	0	0	0	0	0	0	0	0
SPBC30D10.09c.1:exon:1-SPBC30D10.09c.1:exon:3	SPBC30D10.09c.1:exon:2	122	1	0	0	0	0	0	0	0	0	0	0	0	0	0	0	0	0	0	0	0	0	0	0	0	0	0	0	0	0	0	0	0	0	0	0	0	0	0	0	0	0	0	0	0	0	0	0
SPBC21.06c.1:exon:10-SPBC21.06c.1:exon:6	SPBC21.06c.1:exon:9;SPBC21.06c.1:exon:8;SPBC21.06c.1:exon:7	349	3	0	0	0	0	0	0	0	0	0	0	0	0	0	0	0	0	0	0	0	0	0	0	0	0	0	0	0	0	0	0	0	0	0	0	0	0	0	0	0	0	0	0	0	0	0	0
SPBC21.06c.1:exon:4-SPBC21.06c.1:exon:1	SPBC21.06c.1:exon:3;SPBC21.06c.1:exon:2	488	2	0	0	0	0	0	0	0	0	0	0	0	0	0	0	0	0	0	1	0	0	0	0	0	0	0	0	0	0	0	0	0	0	0	0	0	0	0	0	0	0	0	0	0	0	0	0
SPBC25H2.10c.1:exon:2-SPBC25H2.10c.1:exon:4	SPBC25H2.10c.1:exon:3	157	1	0	0	0	0	0	0	0	0	0	0	0	0	0	0	0	0	0	0	0	0	0	0	0	0	0	0	0	0	0	0	0	0	0	0	0	0	0	0	0	0	0	0	0	0	0	0
SPBC20F10.04c.1:exon:3-SPBC20F10.04c.1:exon:1	SPBC20F10.04c.1:exon:2	92	1	0	0	0	0	0	0	0	0	0	0	0	0	0	0	0	0	0	0	0	0	0	0	0	0	0	0	0	0	0	0	0	0	0	0	0	0	0	0	0	0	0	0	0	0	0	0
SPBC17D11.08.1:exon:1-SPBC17D11.08.1:exon:5	SPBC17D11.08.1:exon:2;SPBC17D11.08.1:exon:3;SPBC17D11.08.1:exon:4	1034	3	0	0	0	0	0	0	0	0	0	0	0	0	0	0	0	0	0	0	0	0	0	0	0	0	0	0	0	0	0	0	0	0	0	0	0	0	0	0	0	0	0	0	0	0	0	0
SPBC17D1.07c.1:exon:4-SPBC17D1.07c.1:exon:2	SPBC17D1.07c.1:exon:3	463	1	0	0	0	0	0	0	0	0	0	0	0	0	0	0	0	0	0	0	0	0	0	0	0	0	0	0	0	0	0	0	0	0	0	0	0	0	0	0	0	0	0	0	0	0	0	0
SPBC11C11.02.1:exon:1-SPBC11C11.02.1:exon:3	SPBC11C11.02.1:exon:2	92	1	0	0	0	0	0	0	0	0	0	0	0	0	0	0	0	0	0	0	0	0	0	0	0	0	0	0	0	0	0	0	0	0	0	0	0	0	0	1	0	0	0	0	0	0	0	0
SPBC3B8.04c.1:exon:1-SPBC3B8.04c.1:exon:3	SPBC3B8.04c.1:exon:2	45	1	0	0	0	0	0	0	0	0	0	0	0	0	0	0	0	0	0	0	0	0	0	0	0	0	0	0	0	0	0	0	0	0	0	0	0	0	0	0	0	0	0	0	0	0	0	0
SPBC4B4.09.1:exon:4-SPBC4B4.09.1:exon:7	SPBC4B4.09.1:exon:5;SPBC4B4.09.1:exon:6	884	2	0	0	0	0	0	0	0	0	0	0	0	0	0	0	0	0	0	0	0	0	0	0	0	0	0	0	0	0	0	0	0	0	0	0	0	0	0	0	0	0	0	0	0	0	0	0
SPBC1105.07c.1:exon:4-SPBC1105.07c.1:exon:1	SPBC1105.07c.1:exon:3;SPBC1105.07c.1:exon:2	750	2	0	0	0	0	0	0	0	0	0	0	0	0	0	0	0	0	0	0	0	0	0	0	0	0	0	0	0	0	0	0	0	0	0	0	0	0	0	0	0	0	0	0	0	0	0	0
SPBC887.02.1:exon:1-SPBC887.02.1:exon:3	SPBC887.02.1:exon:2	1850	1	0	0	0	0	0	0	0	0	0	0	0	0	0	0	0	0	0	0	0	0	0	0	0	0	0	0	0	0	0	0	0	0	0	0	0	0	0	0	0	0	0	0	0	0	0	0
SPBC887.07.1:exon:1-SPBC887.07.1:exon:3	SPBC887.07.1:exon:2	58	1	0	0	0	0	0	0	0	0	0	0	0	0	0	0	0	0	0	0	0	0	0	0	0	0	0	0	0	0	0	0	0	0	0	0	0	0	0	0	0	0	0	0	0	0	0	0
SPBC16D10.07c.1:exon:6-SPBC16D10.07c.1:exon:2	SPBC16D10.07c.1:exon:5;SPBC16D10.07c.1:exon:4;SPBC16D10.07c.1:exon:3	178	3	0	0	0	0	0	0	0	0	0	0	0	0	0	0	0	0	0	0	0	0	0	0	0	0	0	0	0	0	0	0	0	0	0	0	0	0	0	0	0	0	0	0	0	0	0	0
SPBC16D10.10.1:exon:1-SPBC16D10.10.1:exon:7	SPBC16D10.10.1:exon:2;SPBC16D10.10.1:exon:3;SPBC16D10.10.1:exon:4;SPBC16D10.10.1:exon:5;SPBC16D10.10.1:exon:6	932	5	0	0	0	0	0	0	0	0	0	0	0	0	0	0	0	0	0	0	0	0	0	0	0	0	0	0	0	0	0	0	0	0	0	0	0	0	0	0	0	0	0	0	0	0	0	0
SPBC16D10.10.1:exon:4-SPBC16D10.10.1:exon:6	SPBC16D10.10.1:exon:5	116	1	0	0	0	0	0	0	0	0	0	0	0	0	0	0	0	0	0	0	0	0	0	0	0	0	0	0	0	0	0	0	0	0	0	0	0	0	0	0	0	0	1	0	0	0	0	0
SPBC3B9.14c.1:exon:3-SPBC3B9.14c.1:exon:1	SPBC3B9.14c.1:exon:2	261	1	0	0	0	0	0	0	0	0	0	0	0	0	0	0	0	0	0	0	0	0	0	0	0	0	0	0	0	0	0	0	0	0	0	0	0	0	0	1	0	0	0	0	0	0	0	0
SPBC1861.01c.1:exon:3-SPBC1861.01c.1:exon:1	SPBC1861.01c.1:exon:2	1428	1	0	0	0	0	0	0	0	0	0	0	0	0	0	0	0	0	0	0	0	0	0	0	0	0	0	0	0	0	0	0	0	0	0	0	0	0	0	0	0	0	1	0	0	0	0	0
SPBC342.01c.1:exon:3-SPBC342.01c.1:exon:1	SPBC342.01c.1:exon:2	124	1	0	0	0	0	0	0	0	0	0	0	0	0	0	0	0	0	0	0	0	0	0	0	0	0	0	0	0	0	0	0	0	0	0	0	0	0	0	0	0	0	0	0	0	0	0	0
SPBC16A3.09c.1:exon:1-SPBC16A3.09c.1:exon:3	SPBC16A3.09c.1:exon:2	169	1	0	0	0	0	0	0	0	0	0	0	0	0	0	0	0	0	0	0	0	0	0	0	0	0	0	0	0	0	0	0	0	0	0	0	0	0	0	0	0	0	0	0	0	0	0	0
SPBC543.05c.1:exon:4-SPBC543.05c.1:exon:1	SPBC543.05c.1:exon:3;SPBC543.05c.1:exon:2	781	2	0	0	0	0	0	0	0	0	0	0	0	0	0	0	0	0	0	0	0	0	0	0	0	0	0	0	0	0	0	0	0	0	0	0	0	0	0	0	0	0	0	0	0	0	0	0
SPBC1539.05.1:exon:1-SPBC1539.05.1:exon:5	SPBC1539.05.1:exon:2;SPBC1539.05.1:exon:3;SPBC1539.05.1:exon:4	711	3	0	0	0	0	0	0	0	0	0	0	0	0	0	0	0	0	0	0	0	0	0	0	0	0	0	0	0	0	0	0	0	0	0	0	0	0	0	0	0	0	0	0	0	0	0	0
SPBC1289.05c.1:exon:5-SPBC1289.05c.1:exon:3	SPBC1289.05c.1:exon:4	39	1	0	0	0	0	0	0	0	0	0	0	0	0	0	0	0	0	0	0	0	0	0	0	0	0	0	0	0	0	0	0	0	0	0	0	0	0	0	0	0	0	0	0	0	0	0	0
SPBC1289.11.1:exon:4-SPBC1289.11.1:exon:6	SPBC1289.11.1:exon:5	244	1	0	0	0	0	0	0	0	0	0	0	0	0	0	0	0	0	0	0	0	0	0	0	0	0	0	0	0	0	0	0	0	0	0	0	0	0	0	0	0	0	0	0	0	0	0	0
SPCC1235.07.1:exon:2-SPCC1235.07.1:exon:4	SPCC1235.07.1:exon:3	165	1	0	0	0	0	0	0	0	0	0	0	0	0	0	0	0	0	0	0	0	0	0	0	0	0	0	0	0	0	0	0	0	0	0	0	0	0	0	0	0	0	0	0	0	0	0	0
SPCC553.11c.1:exon:1-SPCC553.11c.1:exon:4	SPCC553.11c.1:exon:2;SPCC553.11c.1:exon:3	88	2	0	0	0	0	0	0	0	0	0	0	0	0	0	0	0	0	0	0	0	0	0	0	0	0	0	0	0	0	0	0	0	0	0	0	0	0	0	0	0	0	0	0	0	0	0	0
SPCC736.12c.1:exon:5-SPCC736.12c.1:exon:3	SPCC736.12c.1:exon:4	960	1	0	0	0	0	0	0	0	0	0	0	0	0	0	0	0	0	0	0	0	0	0	0	0	0	0	0	0	0	0	0	0	0	0	0	0	0	0	0	0	0	0	0	0	0	0	0
SPCC364.05.1:exon:5-SPCC364.05.1:exon:1	SPCC364.05.1:exon:4;SPCC364.05.1:exon:3;SPCC364.05.1:exon:2	359	3	0	0	0	0	0	0	0	0	0	0	0	0	0	0	0	0	0	0	0	0	0	0	0	0	0	0	0	0	0	0	0	0	0	0	0	0	0	0	0	0	1	0	0	0	0	0
SPCC970.01.1:exon:9-SPCC970.01.1:exon:4	SPCC970.01.1:exon:8;SPCC970.01.1:exon:7;SPCC970.01.1:exon:6;SPCC970.01.1:exon:5	1233	4	0	0	0	0	0	0	0	0	0	0	0	0	0	0	0	0	0	0	0	0	0	0	0	0	0	0	0	0	0	0	0	0	0	0	0	0	0	0	0	0	0	0	0	0	0	0
SPCC970.01.1:exon:5-SPCC970.01.1:exon:3	SPCC970.01.1:exon:4	328	1	0	0	0	0	0	0	0	0	0	0	0	0	0	0	0	0	0	0	0	0	0	0	0	0	0	0	0	0	0	0	0	0	0	0	0	0	0	0	0	0	0	0	0	0	0	0
SPCP31B10.04.1:exon:1-SPCP31B10.04.1:exon:3	SPCP31B10.04.1:exon:2	342	1	0	0	0	0	0	0	0	0	0	0	0	0	0	0	0	0	0	0	0	0	0	0	0	0	0	0	0	0	0	0	0	0	0	0	0	0	0	0	0	0	0	0	0	0	0	0
SPCPJ732.02c.1:five_prime_UTR:3-SPCPJ732.02c.1:exon:2	SPCPJ732.02c.1:five_prime_UTR:2;SPCPJ732.02c.1:exon:3	1152	2	0	0	0	0	0	0	0	0	0	0	0	0	0	0	0	0	0	0	0	0	0	0	0	0	0	0	0	0	0	0	0	0	0	0	0	0	0	0	0	0	0	0	0	0	0	0
SPCC1020.07.1:exon:4-SPCC1020.07.1:exon:2	SPCC1020.07.1:exon:3	43	1	0	0	0	0	0	0	0	0	0	0	0	0	1	0	0	0	0	1	0	0	0	0	0	0	0	0	0	0	0	0	0	0	0	0	0	0	0	0	0	0	0	0	0	0	0	0
SPCC895.09c.1:exon:4-SPCC895.09c.1:exon:1	SPCC895.09c.1:exon:3;SPCC895.09c.1:exon:2	2622	2	0	0	0	0	0	0	0	0	0	0	0	0	0	0	0	0	0	0	0	0	0	0	0	0	0	0	0	0	0	0	0	0	0	0	0	0	0	0	0	0	0	0	0	0	0	0
SPCC1259.15c.1:exon:5-SPCC1259.15c.1:exon:3	SPCC1259.15c.1:exon:4	28	1	0	0	0	0	0	0	0	0	0	0	0	0	0	0	0	0	0	0	0	0	0	0	0	0	0	0	0	0	0	0	0	0	0	0	1	0	0	1	0	1	0	0	0	0	0	0
SPCC1259.15c.1:exon:5-SPCC1259.15c.1:exon:2	SPCC1259.15c.1:exon:4;SPCC1259.15c.1:exon:3	118	2	0	0	0	0	0	0	0	0	0	0	0	0	0	0	0	0	0	0	0	0	0	0	0	0	0	0	0	0	0	0	0	0	0	0	0	0	0	0	0	0	0	0	0	0	0	0
SPCC4B3.05c.1:exon:2-SPCC4B3.05c.1:exon:4	SPCC4B3.05c.1:exon:3	25	1	0	0	0	0	0	0	0	0	0	0	0	0	0	0	0	0	0	0	0	0	0	0	0	0	0	0	0	0	0	0	0	0	0	0	0	0	0	0	0	0	0	0	0	0	0	0
SPCC285.09c.1:exon:4-SPCC285.09c.1:exon:1	SPCC285.09c.1:exon:3;SPCC285.09c.1:exon:2	422	2	0	0	0	0	0	0	0	0	0	0	0	0	0	0	0	0	0	0	0	0	0	0	0	0	0	0	0	0	0	0	0	0	0	0	0	0	0	0	1	0	0	0	0	0	0	0
SPCC285.17.1:exon:1-SPCC285.17.1:exon:4	SPCC285.17.1:exon:2;SPCC285.17.1:exon:3	362	2	0	0	0	0	0	0	0	0	0	0	0	0	0	0	0	0	0	0	0	0	0	0	0	0	0	0	0	0	0	0	0	0	0	0	0	0	0	0	0	0	0	0	0	0	0	0
SPCC737.07c.1:exon:4-SPCC737.07c.1:exon:2	SPCC737.07c.1:exon:3	173	1	0	0	0	0	0	0	0	0	0	0	0	0	0	0	0	0	0	0	0	0	0	0	0	0	0	0	0	0	0	0	0	0	0	0	0	0	0	0	0	0	0	0	0	0	1	0
SPCC1739.03.1:exon:2-SPCC1739.03.1:exon:4	SPCC1739.03.1:exon:3	153	1	0	0	0	0	0	0	0	0	0	0	0	0	0	0	0	0	0	0	0	0	0	0	0	0	0	0	0	0	0	0	0	0	0	0	0	0	0	0	0	0	0	0	0	0	0	0
SPCC1620.01c.1:exon:3-SPCC1620.01c.1:exon:1	SPCC1620.01c.1:exon:2	103	1	0	0	0	0	0	0	0	0	0	0	0	0	0	0	0	0	0	0	0	0	0	0	0	0	0	0	0	0	0	0	0	0	0	0	0	0	0	0	0	0	0	0	0	0	0	0
SPCC1620.05.1:exon:2-SPCC1620.05.1:exon:6	SPCC1620.05.1:exon:3;SPCC1620.05.1:exon:4;SPCC1620.05.1:exon:5	538	3	0	0	0	0	0	0	0	0	0	0	0	0	0	0	0	0	0	0	0	0	0	0	0	0	0	0	0	0	0	0	0	0	0	0	0	0	0	0	0	0	0	0	0	0	0	0
SPCC1620.05.1:exon:3-SPCC1620.05.1:exon:7	SPCC1620.05.1:exon:4;SPCC1620.05.1:exon:5;SPCC1620.05.1:exon:6	614	3	0	0	0	0	0	0	0	0	0	0	0	0	0	0	0	0	0	0	0	0	0	0	0	0	0	0	0	0	0	0	0	0	0	0	0	0	0	0	0	0	0	0	0	0	0	0
SPCC320.04c.1:exon:3-SPCC320.04c.1:exon:5	SPCC320.04c.1:exon:4	156	1	0	0	0	0	0	0	0	0	0	0	0	0	0	0	0	0	0	0	0	0	0	0	0	0	0	0	0	0	0	0	0	0	0	0	0	0	0	0	0	0	0	0	0	0	0	0
SPCC320.04c.1:exon:3-SPCC320.04c.1:exon:8	SPCC320.04c.1:exon:4;SPCC320.04c.1:exon:5;SPCC320.04c.1:exon:6;SPCC320.04c.1:exon:7	598	4	0	0	0	0	0	0	0	0	0	0	0	0	0	0	0	0	0	0	0	0	0	0	0	0	0	0	0	0	0	0	0	0	0	0	0	0	0	0	0	0	0	0	0	0	0	0
SPCC553.07c.1:exon:1-SPCC553.07c.1:exon:3	SPCC553.07c.1:exon:2	440	1	0	0	0	0	0	0	0	0	0	0	0	0	0	0	0	0	0	0	0	0	0	0	0	0	0	0	0	0	0	0	0	0	0	0	0	0	0	0	0	0	0	0	0	0	0	0
SPCC1682.01.1:exon:1-SPCC1682.01.1:exon:3	SPCC1682.01.1:exon:2	86	1	0	0	0	0	0	0	0	0	0	0	0	0	0	0	0	0	0	0	0	0	0	0	0	0	0	0	0	0	0	3	0	0	0	0	0	0	0	0	0	0	0	0	0	0	0	0
SPCC1672.09.1:exon:1-SPCC1672.09.1:exon:3	SPCC1672.09.1:exon:2	457	1	0	0	0	0	0	0	0	0	0	0	0	0	0	0	0	0	0	0	0	0	0	0	0	0	0	0	0	0	0	0	0	0	0	0	0	0	0	0	0	1	0	0	0	0	0	0
SPCC1183.01.1:exon:1-SPCC1183.01.1:exon:5	SPCC1183.01.1:exon:2;SPCC1183.01.1:exon:3;SPCC1183.01.1:exon:4	721	3	0	0	0	0	0	0	0	0	0	0	0	0	0	0	0	0	0	0	0	0	0	0	0	0	0	0	0	0	0	0	0	0	0	0	0	0	0	0	0	0	0	0	0	0	0	0
SPCC1183.05c.1:exon:12-SPCC1183.05c.1:exon:6	SPCC1183.05c.1:exon:11;SPCC1183.05c.1:exon:10;SPCC1183.05c.1:exon:9;SPCC1183.05c.1:exon:8;SPCC1183.05c.1:exon:7	357	5	0	0	0	0	0	0	0	0	0	0	0	0	0	0	0	0	0	0	0	0	0	0	0	0	0	0	0	0	0	0	0	0	0	0	0	0	0	0	0	0	0	0	0	0	0	0
SPCC18B5.06.1:exon:1-SPCC18B5.06.1:exon:3	SPCC18B5.06.1:exon:2	54	1	0	0	0	0	0	0	0	0	0	0	0	0	0	0	0	0	0	0	0	0	0	0	0	0	0	0	0	0	0	0	0	0	0	0	0	0	0	0	0	0	0	0	0	0	0	0
SPCC18B5.10c.1:exon:6-SPCC18B5.10c.1:exon:1	SPCC18B5.10c.1:exon:5;SPCC18B5.10c.1:exon:4;SPCC18B5.10c.1:exon:3;SPCC18B5.10c.1:exon:2	485	4	0	0	0	0	0	0	0	0	0	0	0	0	0	0	0	0	0	0	0	0	0	0	0	0	0	0	0	0	0	0	0	0	0	0	0	0	0	0	0	0	0	0	0	0	0	0
SPCC18B5.10c.1:exon:5-SPCC18B5.10c.1:exon:1	SPCC18B5.10c.1:exon:4;SPCC18B5.10c.1:exon:3;SPCC18B5.10c.1:exon:2	393	3	0	0	0	0	0	0	0	0	0	0	0	0	0	0	0	0	0	0	0	0	0	0	0	0	0	0	0	0	0	0	0	0	0	0	0	0	0	0	1	0	0	0	0	0	0	0
SPCC14G10.04.1:exon:1-SPCC14G10.04.1:exon:3	SPCC14G10.04.1:exon:2	60	1	0	0	0	0	0	0	0	0	0	0	0	0	0	0	0	0	0	0	0	0	0	0	0	0	0	0	0	0	0	0	0	0	0	0	0	0	0	0	0	0	0	0	0	0	0	0
SPCC1020.13c.1:exon:1-SPCC1020.13c.1:exon:3	SPCC1020.13c.1:exon:2	565	1	0	0	0	0	0	0	0	0	0	0	0	0	0	0	0	0	0	0	0	0	0	0	0	0	0	0	0	0	0	0	0	0	0	0	0	0	0	0	0	0	0	0	0	0	0	0
SPCC16A11.05c.1:exon:3-SPCC16A11.05c.1:exon:1	SPCC16A11.05c.1:exon:2	111	1	0	0	0	0	0	0	0	0	0	0	0	0	0	0	0	0	0	0	0	0	0	0	0	0	0	0	0	0	0	0	0	0	0	0	0	0	0	0	0	0	0	0	0	0	0	0
SPCC1259.09c.1:exon:3-SPCC1259.09c.1:exon:1	SPCC1259.09c.1:exon:2	232	1	0	0	0	0	0	0	0	0	0	0	0	0	0	0	0	0	0	0	0	0	0	0	0	0	0	0	0	0	0	0	0	0	0	0	0	0	0	0	0	0	0	0	0	0	0	0
SPCC550.02c.1:exon:3-SPCC550.02c.1:exon:1	SPCC550.02c.1:exon:2	357	1	0	0	0	0	0	0	0	0	0	0	0	0	0	0	0	0	0	0	0	0	0	0	0	0	0	0	0	0	0	0	0	0	0	0	0	0	0	0	0	0	0	0	0	0	0	0
SPCC4E9.01c.1:exon:4-SPCC4E9.01c.1:exon:1	SPCC4E9.01c.1:exon:3;SPCC4E9.01c.1:exon:2	702	2	0	0	0	0	0	0	0	0	0	0	0	0	0	0	0	0	0	0	0	0	0	0	0	0	0	0	0	0	0	0	0	0	0	0	0	0	0	0	0	0	0	0	0	0	0	0
SPCC338.15.1:exon:4-SPCC338.15.1:exon:2	SPCC338.15.1:exon:3	111	1	0	0	0	0	0	0	0	0	0	0	0	0	0	0	0	0	0	0	0	0	0	0	0	0	0	0	0	0	0	0	0	0	0	0	0	0	0	0	1	0	0	0	0	0	0	0
SPCC663.02.1:exon:1-SPCC663.02.1:exon:4	SPCC663.02.1:exon:2;SPCC663.02.1:exon:3	477	2	0	0	0	0	0	0	0	0	0	0	0	0	1	0	0	0	0	0	0	0	0	0	0	0	0	0	0	0	0	0	0	0	0	0	0	0	0	0	0	0	0	0	0	0	0	0
SPCC1739.09c.1:exon:6-SPCC1739.09c.1:exon:2	SPCC1739.09c.1:exon:5;SPCC1739.09c.1:exon:4;SPCC1739.09c.1:exon:3	130	3	0	0	0	0	0	0	0	0	0	0	0	0	0	0	0	0	0	0	0	0	0	0	0	0	0	0	0	0	0	0	0	0	0	0	0	0	0	0	0	1	0	0	0	0	0	0
SPCC126.06.1:exon:2-SPCC126.06.1:exon:7	SPCC126.06.1:exon:3;SPCC126.06.1:exon:4;SPCC126.06.1:exon:5;SPCC126.06.1:exon:6	752	4	0	0	0	0	0	0	0	0	0	0	0	0	0	0	0	0	0	0	0	0	0	0	0	0	0	0	0	0	0	0	0	0	0	0	0	0	0	0	0	0	0	0	0	0	0	0
SPCC1919.06c.1:exon:5-SPCC1919.06c.1:exon:3	SPCC1919.06c.1:exon:4	246	1	0	0	0	0	0	0	0	0	0	0	0	0	0	0	0	0	0	0	0	0	0	0	0	0	0	0	0	0	0	0	0	0	0	0	0	0	0	0	0	0	0	0	0	0	0	0
SPCC1827.05c.1:exon:3-SPCC1827.05c.1:exon:1	SPCC1827.05c.1:exon:2	386	1	0	0	0	0	0	0	0	0	0	0	0	0	0	0	0	0	0	0	0	0	0	0	0	0	0	0	0	1	0	0	0	0	0	0	0	0	0	0	0	0	0	0	0	0	0	0
SPAC18B11.09c.1:exon:1-SPAC18B11.09c.1:exon:3	SPAC18B11.09c.1:exon:2	307	1	0	0	0	0	0	0	0	0	0	0	0	0	0	0	0	0	0	0	0	0	0	0	0	0	0	0	0	0	0	0	0	0	0	0	0	0	0	0	0	0	0	0	0	0	0	0
SPAC12G12.11c.1:exon:1-SPAC12G12.11c.1:exon:3	SPAC12G12.11c.1:exon:2	450	1	0	0	0	0	0	0	0	0	0	0	0	0	0	0	0	0	0	0	0	0	0	0	0	0	0	0	0	0	0	0	0	0	0	0	0	0	0	0	0	0	0	0	0	0	0	0
SPAC13C5.07.1:exon:2-SPAC13C5.07.1:exon:4	SPAC13C5.07.1:exon:3	575	1	0	0	0	0	0	0	0	0	0	0	0	0	0	0	0	0	0	0	0	0	0	0	0	0	0	0	0	0	0	0	0	0	0	0	0	0	0	0	0	0	0	0	0	0	0	0
SPAC22G7.01c.1:exon:3-SPAC22G7.01c.1:exon:1	SPAC22G7.01c.1:exon:2	56	1	0	0	0	0	0	0	0	0	0	0	0	0	0	0	0	0	0	0	0	0	0	0	0	0	0	1	0	0	0	0	0	0	0	0	0	0	0	0	0	0	0	0	0	0	0	0
SPAC22G7.02.1:exon:2-SPAC22G7.02.1:exon:4	SPAC22G7.02.1:exon:3	2022	1	0	0	0	0	0	0	0	0	0	0	0	0	0	0	0	0	0	0	0	0	0	0	0	0	0	0	0	0	0	0	0	0	0	0	0	0	0	0	0	0	0	0	0	0	0	0
SPAC22G7.04.1:exon:3-SPAC22G7.04.1:exon:6	SPAC22G7.04.1:exon:4;SPAC22G7.04.1:exon:5	705	2	0	0	0	0	0	0	0	0	0	0	0	0	0	0	0	0	0	0	0	0	0	0	0	0	0	0	0	0	0	0	0	0	0	0	0	0	0	0	0	0	0	0	0	0	0	0
SPAC22G7.09c.1:exon:5-SPAC22G7.09c.1:exon:3	SPAC22G7.09c.1:exon:4	87	1	0	0	0	0	0	0	0	0	0	0	0	0	0	0	0	0	0	0	0	0	0	0	0	0	0	0	0	0	0	0	0	0	0	0	0	0	0	0	0	0	0	0	0	0	0	0
SPAC16C9.02c.1:exon:3-SPAC16C9.02c.1:exon:1	SPAC16C9.02c.1:exon:2	561	1	0	0	0	0	0	0	0	0	0	0	0	0	0	0	0	0	0	0	0	0	0	0	0	0	0	0	0	0	0	0	0	0	0	0	0	0	0	0	0	0	0	0	0	0	0	0
SPAC2G11.06.1:exon:2-SPAC2G11.06.1:exon:4	SPAC2G11.06.1:exon:3	487	1	0	0	0	0	0	0	0	0	0	0	0	0	0	0	0	0	0	0	0	0	0	0	0	0	0	0	0	0	0	0	0	0	0	0	0	0	0	0	0	0	0	0	0	0	0	0
SPAC1687.18c.1:exon:4-SPAC1687.18c.1:exon:2	SPAC1687.18c.1:exon:3	132	1	0	0	0	0	0	0	0	0	0	0	0	0	0	0	0	0	0	0	0	0	0	0	0	0	0	0	0	0	0	0	0	0	0	0	0	0	0	0	0	0	0	0	0	0	0	0
SPAC222.16c.1:exon:6-SPAC222.16c.1:exon:1	SPAC222.16c.1:exon:5;SPAC222.16c.1:exon:4;SPAC222.16c.1:exon:3;SPAC222.16c.1:exon:2	483	4	0	0	0	0	0	0	0	0	0	0	0	0	0	0	0	0	0	0	0	0	0	0	0	0	0	0	0	0	0	0	0	0	0	0	0	0	0	0	0	0	0	0	0	0	0	0
SPAC222.16c.1:exon:5-SPAC222.16c.1:exon:1	SPAC222.16c.1:exon:4;SPAC222.16c.1:exon:3;SPAC222.16c.1:exon:2	336	3	0	0	0	0	0	0	0	0	0	0	0	0	0	0	0	0	0	0	0	0	0	0	0	0	0	0	0	0	0	0	0	0	0	0	0	0	0	0	0	0	0	0	0	0	0	0
SPAC23C4.09c.1:exon:4-SPAC23C4.09c.1:exon:1	SPAC23C4.09c.1:exon:3;SPAC23C4.09c.1:exon:2	207	2	0	0	0	0	0	0	0	0	0	0	0	0	0	0	0	0	0	0	0	0	0	0	0	0	0	0	0	0	0	0	0	0	0	0	0	0	0	0	0	0	0	0	0	0	0	0
SPAC23C4.17.1:exon:2-SPAC23C4.17.1:exon:5	SPAC23C4.17.1:exon:3;SPAC23C4.17.1:exon:4	1422	2	0	0	0	0	0	0	0	0	0	0	0	0	0	0	0	0	0	0	0	0	0	0	0	0	0	0	0	0	0	0	0	0	0	0	0	0	0	0	0	0	0	0	0	0	0	0
SPAC30D11.13.1:exon:4-SPAC30D11.13.1:exon:2	SPAC30D11.13.1:exon:3	110	1	0	0	0	0	0	0	0	0	0	0	0	0	0	0	0	0	0	1	0	0	0	0	0	0	0	0	0	0	0	0	0	0	0	0	0	0	0	0	0	0	0	0	0	0	0	0
SPAC4C5.04.1:exon:3-SPAC4C5.04.1:exon:5	SPAC4C5.04.1:exon:4	100	1	0	0	0	0	0	0	0	0	0	0	0	0	0	0	0	0	0	0	0	0	0	0	0	0	0	0	0	0	0	1	0	0	0	0	0	0	0	0	0	0	0	0	0	0	0	0
SPAPB17E12.06.1:exon:1-SPAPB17E12.06.1:exon:3	SPAPB17E12.06.1:exon:2	50	1	0	0	0	0	0	0	0	0	0	0	0	0	0	0	0	0	0	0	0	0	0	0	0	0	0	0	0	0	0	0	0	0	0	0	0	0	0	0	0	0	0	0	0	0	0	0
SPAPB17E12.11.1:exon:1-SPAPB17E12.11.1:exon:3	SPAPB17E12.11.1:exon:2	118	1	0	0	0	0	0	0	0	0	0	0	0	0	0	0	0	0	0	0	0	0	0	0	0	0	0	0	0	0	0	0	0	0	0	0	0	0	0	0	0	0	0	0	0	0	0	0
SPAC20G8.09c.1:exon:3-SPAC20G8.09c.1:exon:1	SPAC20G8.09c.1:exon:2	146	1	0	0	0	0	0	0	0	0	0	0	0	0	0	0	0	0	0	0	0	0	0	0	0	0	0	0	0	0	0	0	0	0	0	0	0	0	0	0	0	0	0	0	0	0	0	0
SPAC3A12.05c.1:exon:4-SPAC3A12.05c.1:exon:2	SPAC3A12.05c.1:exon:3	122	1	0	0	0	0	0	0	0	0	0	0	0	0	0	0	0	0	0	0	0	0	0	0	0	0	0	0	0	0	0	0	0	0	0	0	0	0	0	0	0	0	0	0	0	0	0	0
SPAC5D6.05.1:exon:3-SPAC5D6.05.1:exon:1	SPAC5D6.05.1:exon:2	123	1	0	0	0	0	0	0	0	0	0	0	0	0	0	0	0	0	0	0	0	0	0	0	0	0	0	0	0	0	0	0	0	0	0	0	0	0	0	0	0	0	0	0	0	0	0	0
SPAC1610.03c.1:exon:4-SPAC1610.03c.1:exon:2	SPAC1610.03c.1:exon:3	178	1	0	0	0	0	0	0	0	0	0	0	0	0	0	0	0	0	0	0	0	0	0	0	0	0	0	0	0	0	0	0	0	0	0	0	0	0	0	0	0	0	0	0	0	0	0	0
SPAC732.01.1:exon:2-SPAC732.01.1:exon:6	SPAC732.01.1:exon:3;SPAC732.01.1:exon:4;SPAC732.01.1:exon:5	217	3	0	0	0	0	0	0	0	0	0	0	0	0	0	0	0	0	0	0	0	0	0	0	0	0	0	0	0	0	0	0	0	0	0	0	0	0	0	0	0	0	0	0	0	0	0	0
SPAC732.01.1:exon:4-SPAC732.01.1:exon:6	SPAC732.01.1:exon:5	71	1	0	0	0	0	0	0	0	0	0	0	0	0	0	0	0	0	0	0	0	0	0	0	0	0	0	0	0	0	0	0	0	0	0	0	0	0	0	0	0	0	0	0	0	0	0	0
SPAC20H4.09.1:exon:2-SPAC20H4.09.1:exon:4	SPAC20H4.09.1:exon:3	65	1	0	0	0	0	0	0	0	0	0	0	0	0	0	0	0	0	0	0	0	0	0	0	0	0	0	0	0	0	0	0	0	0	0	0	0	0	0	0	0	0	0	0	0	0	0	0
SPAC17G8.14c.1:exon:4-SPAC17G8.14c.1:exon:1	SPAC17G8.14c.1:exon:3;SPAC17G8.14c.1:exon:2	373	2	0	0	0	0	0	0	0	0	0	0	0	0	0	0	0	0	0	0	0	0	0	0	0	0	0	0	0	0	0	0	0	0	0	0	0	0	0	0	0	1	0	0	0	0	0	0
SPAC22H10.03c.1:exon:7-SPAC22H10.03c.1:exon:5	SPAC22H10.03c.1:exon:6	2222	1	0	0	0	0	0	0	0	0	0	0	0	0	0	0	0	0	0	0	0	0	0	0	0	0	0	0	0	0	0	0	0	0	0	0	0	0	0	0	0	0	0	0	0	0	0	0
SPAC22H10.03c.1:exon:7-SPAC22H10.03c.1:exon:4	SPAC22H10.03c.1:exon:6;SPAC22H10.03c.1:exon:5	2392	2	0	0	0	0	0	0	0	0	0	0	0	0	0	0	0	0	0	0	0	0	0	0	0	0	0	0	0	0	0	0	0	0	0	0	0	0	0	0	0	0	0	0	0	0	0	0
SPAC644.12.1:exon:1-SPAC644.12.1:exon:3	SPAC644.12.1:exon:2	20	1	0	0	0	0	0	0	0	0	0	0	0	0	0	0	0	0	0	0	0	0	0	0	0	0	0	0	0	0	0	0	0	0	0	0	0	0	0	0	0	0	0	0	0	0	0	0
SPAC6G9.07c.1:exon:4-SPAC6G9.07c.1:exon:1	SPAC6G9.07c.1:exon:3;SPAC6G9.07c.1:exon:2	327	2	0	0	0	0	0	0	0	0	0	0	0	0	0	0	0	0	0	0	0	0	0	0	0	0	0	0	0	0	0	0	0	0	0	0	0	0	0	0	0	0	0	0	0	0	0	0
SPAC8E11.04c.1:exon:1-SPAC8E11.04c.1:exon:3	SPAC8E11.04c.1:exon:2	85	1	0	0	0	0	0	0	0	0	0	0	0	0	0	0	0	0	0	0	0	0	0	0	0	0	0	0	0	0	0	0	0	0	0	0	0	0	0	0	0	0	0	0	0	0	0	0
SPAC959.09c.1:exon:4-SPAC959.09c.1:exon:2	SPAC959.09c.1:exon:3	96	1	0	0	0	0	0	0	0	0	0	0	0	0	0	0	0	0	0	0	0	0	0	0	0	0	0	0	0	0	0	0	0	0	0	0	0	0	0	0	0	0	0	0	0	0	0	0
SPAC3H5.11.1:exon:4-SPAC3H5.11.1:exon:1	SPAC3H5.11.1:exon:3;SPAC3H5.11.1:exon:2	820	2	0	0	0	0	0	0	0	0	0	0	0	0	0	0	0	0	0	0	0	0	0	0	0	0	0	0	0	0	0	0	0	0	0	0	0	0	0	0	0	0	0	0	0	0	0	0
SPAC328.05.1:exon:3-SPAC328.05.1:exon:5	SPAC328.05.1:exon:4	102	1	0	0	0	0	0	0	0	0	0	0	0	0	0	0	0	0	0	0	0	0	0	0	0	0	0	0	0	0	0	0	0	0	0	0	0	0	0	0	0	0	0	0	0	0	0	0
SPAC17G6.16c.1:exon:4-SPAC17G6.16c.1:exon:2	SPAC17G6.16c.1:exon:3	901	1	0	0	0	0	0	0	0	0	0	0	0	0	0	0	0	0	0	0	0	0	0	0	0	0	0	0	0	0	0	0	0	0	0	0	0	0	0	0	0	0	0	0	0	0	0	0
SPAC15A10.13.1:exon:2-SPAC15A10.13.1:exon:4	SPAC15A10.13.1:exon:3	102	1	0	0	0	0	0	0	0	0	0	0	0	0	0	0	0	0	0	0	0	0	0	0	0	0	0	0	0	0	0	0	0	0	0	0	0	0	0	0	0	0	0	0	0	0	0	0
SPAC15A10.15.1:exon:1-SPAC15A10.15.1:exon:5	SPAC15A10.15.1:exon:2;SPAC15A10.15.1:exon:3;SPAC15A10.15.1:exon:4	341	3	0	0	0	0	0	0	0	0	0	0	0	0	0	0	0	0	0	0	0	0	0	0	0	0	0	0	0	0	0	0	0	0	0	0	0	0	0	0	0	0	0	0	0	0	0	0
SPAC1556.05c.1:exon:4-SPAC1556.05c.1:exon:1	SPAC1556.05c.1:exon:3;SPAC1556.05c.1:exon:2	158	2	0	0	0	0	0	0	0	0	0	0	0	0	0	0	0	0	0	0	0	0	0	0	0	0	0	0	0	0	0	0	0	0	0	0	0	0	0	0	0	0	0	0	0	0	0	0
SPAC4H3.06.1:exon:1-SPAC4H3.06.1:exon:4	SPAC4H3.06.1:exon:2;SPAC4H3.06.1:exon:3	264	2	0	0	0	0	0	0	0	0	0	0	0	0	0	0	0	0	0	0	0	0	0	0	0	0	0	0	0	0	0	0	0	0	0	0	0	0	0	0	0	0	0	0	0	0	0	0
SPAC323.02c.1:exon:4-SPAC323.02c.1:exon:2	SPAC323.02c.1:exon:3	442	1	0	0	0	0	0	0	0	0	0	0	0	0	0	0	0	0	0	0	0	0	0	0	0	0	0	0	0	0	0	0	0	0	0	0	0	0	0	0	0	0	0	0	0	0	0	0
SPAC19G12.07c.1:exon:6-SPAC19G12.07c.1:exon:3	SPAC19G12.07c.1:exon:5;SPAC19G12.07c.1:exon:4	312	2	0	0	0	0	0	0	0	0	0	0	0	0	0	0	0	0	0	0	0	0	0	0	0	0	0	0	0	0	0	0	0	0	0	0	0	0	0	0	0	0	0	0	0	0	0	0
SPAC19G12.14.1:exon:1-SPAC19G12.14.1:exon:3	SPAC19G12.14.1:exon:2	112	1	0	0	0	0	0	0	0	0	0	0	0	0	0	0	0	0	0	0	0	0	0	0	0	0	0	0	0	0	0	0	0	0	0	0	0	0	0	0	0	0	0	0	0	0	0	0
SPAC26H5.02c.1:exon:4-SPAC26H5.02c.1:exon:2	SPAC26H5.02c.1:exon:3	18	1	0	0	0	0	0	0	0	0	0	0	0	0	0	0	0	0	0	0	0	0	0	0	0	0	0	0	0	0	0	0	0	0	0	0	0	0	0	0	0	0	0	0	0	0	0	0
SPAC16.02c.1:exon:8-SPAC16.02c.1:exon:6	SPAC16.02c.1:exon:7	6	1	0	0	0	0	0	0	0	0	0	0	0	0	0	0	0	0	0	0	0	0	0	0	0	0	0	0	0	0	0	0	0	0	0	0	0	0	0	0	0	0	0	0	0	0	0	0
SPAC16.02c.1:exon:8-SPAC16.02c.1:exon:3	SPAC16.02c.1:exon:7;SPAC16.02c.1:exon:6;SPAC16.02c.1:exon:5;SPAC16.02c.1:exon:4	170	4	0	0	0	0	0	0	0	0	0	0	0	0	0	0	0	0	0	0	0	0	0	0	0	0	0	0	0	0	0	0	0	0	0	0	0	0	0	0	0	0	0	0	0	0	0	0
SPAC16.02c.1:exon:5-SPAC16.02c.1:exon:1	SPAC16.02c.1:exon:4;SPAC16.02c.1:exon:3;SPAC16.02c.1:exon:2	244	3	0	0	0	0	0	0	0	0	0	0	0	0	0	0	0	0	0	0	0	0	0	0	0	0	0	0	0	0	0	0	0	0	0	0	0	0	0	0	0	0	0	0	0	0	0	0
SPAC16.02c.1:exon:3-SPAC16.02c.1:exon:1	SPAC16.02c.1:exon:2	100	1	0	0	0	0	0	0	0	0	0	0	0	0	0	0	0	0	0	1	0	0	0	0	0	0	0	0	0	0	0	0	0	0	0	0	0	0	0	0	0	0	0	0	0	0	0	0
SPAC1952.16.1:exon:3-SPAC1952.16.1:exon:7	SPAC1952.16.1:exon:4;SPAC1952.16.1:exon:5;SPAC1952.16.1:exon:6	355	3	0	0	0	0	0	0	0	0	0	0	0	0	0	0	0	0	0	0	0	0	0	0	0	0	0	0	0	0	0	0	0	0	0	0	0	0	0	0	0	0	0	0	0	0	0	0
SPAC1952.16.1:exon:3-SPAC1952.16.1:exon:8	SPAC1952.16.1:exon:4;SPAC1952.16.1:exon:5;SPAC1952.16.1:exon:6;SPAC1952.16.1:exon:7	754	4	0	0	0	0	0	0	0	0	0	0	0	0	0	0	0	0	0	0	0	0	0	0	0	0	0	0	0	0	0	0	0	0	0	0	0	0	0	0	0	0	0	0	0	0	0	0
SPAC19D5.05c.1:exon:3-SPAC19D5.05c.1:exon:1	SPAC19D5.05c.1:exon:2	509	1	0	0	0	0	0	0	0	0	0	0	0	0	0	0	0	0	0	0	0	0	0	0	0	0	0	0	0	0	0	0	0	0	0	0	0	0	0	0	0	0	0	0	0	0	0	0
SPAP8A3.08.1:exon:2-SPAP8A3.08.1:exon:5	SPAP8A3.08.1:exon:3;SPAP8A3.08.1:exon:4	234	2	0	0	0	0	0	0	0	0	0	0	0	0	1	0	0	0	0	0	4	0	0	0	0	0	0	0	0	0	0	0	3	0	0	0	0	0	0	0	0	0	1	0	0	0	0	0
SPAC4D7.10c.1:exon:3-SPAC4D7.10c.1:exon:1	SPAC4D7.10c.1:exon:2	987	1	0	0	0	0	0	0	0	0	0	0	0	0	0	0	0	0	0	0	0	0	0	0	0	0	0	0	0	0	0	0	0	0	0	0	0	0	0	0	0	0	0	0	0	0	0	0
SPAC1639.02c.1:exon:12-SPAC1639.02c.1:exon:6	SPAC1639.02c.1:exon:11;SPAC1639.02c.1:exon:10;SPAC1639.02c.1:exon:9;SPAC1639.02c.1:exon:8;SPAC1639.02c.1:exon:7	1896	5	0	0	0	0	0	0	0	0	0	0	0	0	0	0	0	0	0	0	0	0	0	0	0	0	0	0	0	0	0	0	0	0	0	0	0	0	0	0	0	0	0	0	0	0	0	0
SPAC1639.02c.1:exon:6-SPAC1639.02c.1:exon:3	SPAC1639.02c.1:exon:5;SPAC1639.02c.1:exon:4	138	2	0	0	0	0	0	0	0	0	0	0	0	0	0	0	0	0	0	0	0	0	0	0	0	0	0	0	0	0	0	0	0	0	0	0	0	0	0	0	0	0	0	0	0	0	0	0
SPAC18B11.08c.1:exon:2-SPAC18B11.08c.1:exon:5	SPAC18B11.08c.1:exon:3;SPAC18B11.08c.1:exon:4	127	2	0	0	0	0	0	0	0	0	0	0	0	0	0	0	0	0	0	0	0	0	0	0	0	0	0	0	0	0	0	0	0	0	0	0	0	0	0	0	0	0	0	0	0	0	0	0
SPAC31A2.16.1:exon:2-SPAC31A2.16.1:exon:4	SPAC31A2.16.1:exon:3	109	1	0	0	0	0	0	0	0	0	0	0	0	0	0	0	0	0	0	0	0	0	0	0	0	0	0	0	0	0	0	0	0	0	0	0	0	0	0	0	0	0	0	0	0	0	0	0
SPAC13C5.03.1:exon:1-SPAC13C5.03.1:exon:3	SPAC13C5.03.1:exon:2	605	1	0	0	0	0	0	0	0	0	0	0	0	0	0	0	0	0	0	0	0	0	0	0	0	0	0	0	0	0	0	0	0	0	0	0	0	0	0	0	0	0	0	0	0	0	0	0
SPAC24H6.03.1:exon:5-SPAC24H6.03.1:exon:2	SPAC24H6.03.1:exon:4;SPAC24H6.03.1:exon:3	239	2	0	0	0	0	0	0	0	0	0	0	0	0	0	0	0	0	0	0	0	0	0	0	0	0	0	0	0	0	0	0	0	0	0	0	0	0	0	0	0	0	0	0	0	0	0	0
SPAC227.08c.1:exon:3-SPAC227.08c.1:exon:1	SPAC227.08c.1:exon:2	291	1	0	0	0	0	0	0	0	0	0	0	0	0	0	0	0	0	0	0	0	0	0	0	0	0	0	0	0	0	0	0	0	0	0	0	0	0	0	0	0	0	0	0	0	0	0	0
SPAC2F7.04.1:exon:1-SPAC2F7.04.1:exon:3	SPAC2F7.04.1:exon:2	648	1	0	0	0	0	0	0	0	0	0	0	0	0	0	0	0	0	0	0	0	0	0	0	0	0	0	0	0	0	0	0	0	0	0	0	0	0	0	0	0	1	0	0	0	0	0	0
SPAC1296.04.1:exon:1-SPAC1296.04.1:exon:3	SPAC1296.04.1:exon:2	139	1	0	0	0	0	0	0	0	0	0	0	0	0	0	0	0	0	0	0	0	0	0	0	0	0	0	0	0	0	0	0	0	0	0	0	0	0	0	0	0	0	0	0	0	0	0	0
SPAC1296.06.1:exon:2-SPAC1296.06.1:exon:4	SPAC1296.06.1:exon:3	98	1	0	0	0	0	0	0	0	0	0	0	0	0	0	0	0	0	0	0	0	0	0	0	0	0	0	0	0	0	0	0	0	0	0	0	0	0	0	0	0	0	1	0	0	0	0	0
SPAC23C4.08.1:exon:1-SPAC23C4.08.1:exon:3	SPAC23C4.08.1:exon:2	73	1	0	0	0	0	0	0	0	0	0	0	0	0	0	0	0	0	0	0	0	0	0	0	0	0	0	0	0	0	0	0	0	0	0	0	0	0	0	0	0	0	0	0	0	0	0	0
SPAC1565.06c.1:exon:3-SPAC1565.06c.1:exon:1	SPAC1565.06c.1:exon:2	75	1	0	0	0	0	0	0	0	0	0	0	0	0	0	0	0	0	0	0	0	0	0	0	0	0	0	0	0	1	0	0	0	0	0	0	0	0	0	0	0	0	0	0	0	0	0	0
SPAC6F12.12.1:exon:1-SPAC6F12.12.1:exon:3	SPAC6F12.12.1:exon:2	244	1	0	0	0	0	0	0	0	0	0	0	0	0	0	0	0	0	0	0	0	0	0	0	0	0	0	0	0	0	0	0	0	0	0	0	0	0	0	0	0	0	0	0	0	0	0	0
SPAC9.06c.1:exon:4-SPAC9.06c.1:exon:1	SPAC9.06c.1:exon:3;SPAC9.06c.1:exon:2	227	2	0	0	0	0	0	0	0	0	0	0	0	0	0	0	0	0	0	0	0	0	0	0	0	0	0	0	0	0	0	0	0	0	0	0	0	0	0	0	0	0	0	0	0	0	0	0
SPAC105.01c.1:exon:3-SPAC105.01c.1:exon:1	SPAC105.01c.1:exon:2	80	1	0	0	0	0	0	0	0	0	0	0	0	0	0	0	0	0	0	0	0	0	0	0	0	0	0	0	0	0	0	0	0	0	0	0	0	0	0	0	0	0	0	0	0	0	0	0
SPAC17A5.02c.1:exon:5-SPAC17A5.02c.1:exon:2	SPAC17A5.02c.1:exon:4;SPAC17A5.02c.1:exon:3	891	2	0	0	0	0	0	0	0	0	0	0	0	0	0	0	0	0	0	0	0	0	0	0	0	0	0	0	0	0	0	0	0	0	0	0	0	0	0	0	0	0	0	0	0	0	0	0
SPAC17A5.16.1:exon:4-SPAC17A5.16.1:exon:6	SPAC17A5.16.1:exon:5	208	1	0	0	0	0	0	0	0	0	0	0	0	0	0	0	0	0	0	0	0	0	0	0	0	0	0	0	0	0	0	0	0	0	0	0	0	0	0	0	0	0	0	0	0	0	0	0
SPAC9G1.13c.1:exon:4-SPAC9G1.13c.1:exon:2	SPAC9G1.13c.1:exon:3	89	1	0	0	0	0	0	0	0	0	0	0	0	1	0	0	0	0	0	0	0	0	0	0	0	0	0	0	1	0	0	0	0	0	0	0	0	0	0	0	0	0	0	0	0	0	0	0
SPAC9G1.13c.1:exon:3-SPAC9G1.13c.1:exon:1	SPAC9G1.13c.1:exon:2	78	1	0	0	0	0	0	0	0	0	0	0	0	0	0	0	0	0	0	0	0	0	0	0	0	0	0	0	0	0	0	0	0	0	0	0	0	0	0	0	0	0	0	0	0	0	0	0
SPAC20H4.03c.1:exon:5-SPAC20H4.03c.1:exon:3	SPAC20H4.03c.1:exon:4	63	1	0	0	0	0	0	0	0	0	0	0	0	0	0	0	0	0	0	0	0	0	0	0	0	0	0	0	0	0	0	0	0	0	0	0	0	0	0	0	0	0	0	0	0	0	0	0
SPAC23C11.04c.1:exon:3-SPAC23C11.04c.1:exon:1	SPAC23C11.04c.1:exon:2	143	1	0	0	0	0	0	0	0	0	0	0	0	0	0	0	0	0	0	0	0	0	0	0	0	0	0	0	0	0	0	0	0	0	0	0	0	0	0	0	0	0	0	0	0	0	0	0
SPAC4G9.14.1:exon:2-SPAC4G9.14.1:exon:6	SPAC4G9.14.1:exon:3;SPAC4G9.14.1:exon:4;SPAC4G9.14.1:exon:5	224	3	0	0	0	0	0	0	0	0	0	0	0	0	0	0	0	0	0	0	0	0	0	0	0	0	0	0	0	0	0	0	0	0	0	0	0	0	0	0	0	0	0	0	0	0	0	0
SPAC13G7.07.1:exon:3-SPAC13G7.07.1:exon:6	SPAC13G7.07.1:exon:4;SPAC13G7.07.1:exon:5	324	2	0	0	0	0	0	0	0	0	0	0	0	0	0	0	0	0	0	0	0	0	0	0	0	0	0	0	0	0	0	0	0	0	0	0	0	0	0	0	0	0	0	0	0	0	0	0
SPAC19A8.11c.1:exon:1-SPAC19A8.11c.1:exon:3	SPAC19A8.11c.1:exon:2	390	1	0	0	0	0	0	0	0	0	0	0	0	0	0	0	0	0	0	0	0	0	0	0	0	0	0	0	0	0	0	0	0	0	0	0	0	0	0	0	0	0	0	0	0	0	0	0
SPAC7D4.02c.1:exon:1-SPAC7D4.02c.1:exon:3	SPAC7D4.02c.1:exon:2	232	1	0	0	0	0	0	0	0	0	0	0	0	0	0	0	0	0	0	0	0	0	0	0	0	0	0	0	0	0	0	0	0	0	0	0	0	0	0	0	0	0	0	0	0	0	0	0
SPAPB2B4.05.1:exon:2-SPAPB2B4.05.1:exon:5	SPAPB2B4.05.1:exon:3;SPAPB2B4.05.1:exon:4	187	2	0	0	0	0	0	0	0	0	0	0	0	0	0	0	0	0	0	0	0	0	0	0	0	0	0	0	0	0	0	0	0	0	0	0	0	0	0	0	0	0	0	0	0	0	0	0
SPAC6F6.08c.1:exon:3-SPAC6F6.08c.1:exon:1	SPAC6F6.08c.1:exon:2	148	1	0	0	0	0	0	0	0	0	0	0	0	0	0	0	0	0	0	0	0	0	0	0	0	0	0	0	0	0	0	0	0	0	0	0	0	0	0	0	0	0	0	0	0	0	0	0
SPAC6F6.15.1:exon:3-SPAC6F6.15.1:exon:6	SPAC6F6.15.1:exon:4;SPAC6F6.15.1:exon:5	108	2	0	0	0	0	0	0	0	0	0	0	0	0	0	0	0	0	0	0	0	0	0	0	0	0	0	0	0	0	0	0	0	0	0	0	0	0	0	0	0	0	0	0	0	0	0	0
SPAC6F6.15.1:exon:4-SPAC6F6.15.1:exon:8	SPAC6F6.15.1:exon:5;SPAC6F6.15.1:exon:6;SPAC6F6.15.1:exon:7	220	3	0	0	0	0	0	0	0	0	0	0	0	0	0	0	0	0	0	0	0	0	0	0	0	0	0	0	0	0	0	0	0	0	0	0	0	0	0	0	0	1	0	0	0	0	0	0
SPAC8F11.07c.1:exon:6-SPAC8F11.07c.1:exon:2	SPAC8F11.07c.1:exon:5;SPAC8F11.07c.1:exon:4;SPAC8F11.07c.1:exon:3	892	3	0	0	0	0	0	0	0	0	0	0	0	0	0	0	0	0	0	0	0	0	0	0	0	0	0	0	0	0	0	0	0	0	0	0	0	0	0	0	0	0	0	0	0	0	0	0
SPAC8F11.07c.1:exon:3-SPAC8F11.07c.1:exon:1	SPAC8F11.07c.1:exon:2	135	1	0	0	0	0	0	0	0	0	0	0	0	0	0	0	0	0	0	0	0	0	0	0	0	0	0	0	0	0	0	0	0	0	0	0	0	0	0	0	0	0	0	0	0	0	0	0
SPAC31G5.15.1:exon:1-SPAC31G5.15.1:exon:3	SPAC31G5.15.1:exon:2	69	1	0	0	0	0	0	0	0	0	0	0	0	0	0	0	0	0	0	0	0	0	0	0	0	0	0	0	0	0	0	0	0	0	0	0	0	0	0	0	0	0	0	0	0	0	0	0
SPAC24C9.11.1:exon:2-SPAC24C9.11.1:exon:4	SPAC24C9.11.1:exon:3	321	1	0	0	0	0	0	0	0	0	0	0	0	0	0	0	0	0	0	0	0	0	0	0	0	0	0	0	0	0	0	0	0	0	0	0	0	0	0	0	0	0	0	0	0	0	0	0
SPAC6G10.06.1:exon:1-SPAC6G10.06.1:exon:3	SPAC6G10.06.1:exon:2	342	1	0	0	0	0	0	0	0	0	0	0	0	0	0	0	0	0	0	0	0	0	0	0	0	0	0	0	0	0	0	0	0	0	0	0	0	0	0	0	0	0	0	0	0	0	0	0
SPAC17G6.12.1:exon:2-SPAC17G6.12.1:exon:5	SPAC17G6.12.1:exon:3;SPAC17G6.12.1:exon:4	142	2	0	0	0	0	0	0	0	0	0	0	0	0	0	0	0	0	0	0	0	0	0	0	0	0	0	0	0	0	0	0	0	0	0	0	0	0	0	0	0	0	0	0	0	0	0	0
SPAC15A10.10.1:exon:3-SPAC15A10.10.1:exon:5	SPAC15A10.10.1:exon:4	741	1	0	0	0	0	0	0	0	0	0	0	0	0	0	0	0	0	0	0	0	0	0	0	0	0	0	0	0	0	0	0	0	0	0	0	0	0	0	0	0	0	0	0	0	0	0	0
SPAC1556.04c.1:exon:3-SPAC1556.04c.1:exon:1	SPAC1556.04c.1:exon:2	79	1	0	0	0	0	0	0	0	0	0	0	0	0	0	0	0	0	0	0	0	0	0	0	0	0	0	0	0	0	0	0	0	0	0	0	0	0	0	0	0	0	0	0	0	0	0	0
SPAC1F12.08.1:exon:1-SPAC1F12.08.1:exon:4	SPAC1F12.08.1:exon:2;SPAC1F12.08.1:exon:3	237	2	0	0	0	0	0	0	0	0	0	0	0	0	0	0	0	0	0	0	0	0	0	0	0	0	0	0	0	0	0	0	0	0	0	0	0	0	0	0	0	0	0	0	0	0	0	0
SPAC323.06c.1:exon:10-SPAC323.06c.1:exon:7	SPAC323.06c.1:exon:9;SPAC323.06c.1:exon:8	277	2	0	0	0	0	0	0	0	0	0	0	0	0	0	0	0	0	0	0	0	0	0	0	0	0	0	0	0	0	0	0	0	0	0	0	0	0	0	0	0	0	0	0	0	0	0	0
SPAC323.06c.1:exon:10-SPAC323.06c.1:exon:2	SPAC323.06c.1:exon:9;SPAC323.06c.1:exon:8;SPAC323.06c.1:exon:7;SPAC323.06c.1:exon:6;SPAC323.06c.1:exon:5;SPAC323.06c.1:exon:4;SPAC323.06c.1:exon:3	1359	7	0	0	0	0	0	0	0	0	0	0	0	0	0	0	0	0	0	0	0	0	0	0	0	0	0	0	0	0	0	0	0	0	0	0	0	0	0	0	0	0	0	0	0	0	0	0
SPAC323.06c.1:exon:6-SPAC323.06c.1:exon:3	SPAC323.06c.1:exon:5;SPAC323.06c.1:exon:4	379	2	0	0	0	0	0	0	0	0	0	0	0	0	0	0	0	0	0	0	0	0	0	0	0	0	0	0	0	0	0	0	0	0	0	0	0	0	0	0	0	0	0	0	0	0	0	0
SPAC323.06c.1:exon:3-SPAC323.06c.1:exon:1	SPAC323.06c.1:exon:2	76	1	0	0	0	0	0	0	0	0	0	0	0	0	0	0	0	0	0	0	0	0	0	0	0	0	0	0	0	0	0	0	0	0	0	0	0	0	0	0	0	0	0	0	0	0	0	0
SPAC2F3.16.1:exon:1-SPAC2F3.16.1:exon:4	SPAC2F3.16.1:exon:2;SPAC2F3.16.1:exon:3	438	2	0	0	0	0	0	0	0	0	0	0	0	0	0	0	0	0	0	0	0	0	0	0	0	0	0	0	0	0	0	0	0	0	0	0	0	0	0	0	0	0	0	0	0	0	0	0
SPAC29E6.02.1:exon:3-SPAC29E6.02.1:exon:5	SPAC29E6.02.1:exon:4	311	1	0	0	0	0	0	0	0	0	0	0	0	0	0	0	0	0	0	0	0	0	0	0	0	0	0	0	0	0	0	0	0	0	0	0	0	0	0	0	0	0	0	0	0	0	0	0
SPAC16.01.1:exon:1-SPAC16.01.1:exon:4	SPAC16.01.1:exon:2;SPAC16.01.1:exon:3	85	2	0	0	0	0	0	0	0	0	0	0	0	0	0	0	0	0	0	0	0	0	0	0	0	0	0	0	0	0	0	0	0	0	0	0	0	0	0	0	0	0	0	0	0	0	0	0
SPAC17C9.12.1:exon:3-SPAC17C9.12.1:exon:1	SPAC17C9.12.1:exon:2	116	1	0	0	0	0	0	0	0	0	0	0	0	0	0	0	0	0	0	0	0	0	0	0	0	0	0	0	0	0	0	0	0	0	0	0	0	0	0	0	0	0	0	0	0	0	0	0
SPAC17C9.05c.1:exon:3-SPAC17C9.05c.1:exon:5	SPAC17C9.05c.1:exon:4	422	1	0	0	0	0	0	0	0	0	0	0	0	0	0	0	0	0	0	0	0	0	0	0	0	0	0	0	0	0	0	0	0	0	0	0	0	0	0	0	0	0	0	0	0	0	0	0
SPAC12B10.05.1:exon:4-SPAC12B10.05.1:exon:6	SPAC12B10.05.1:exon:5	14	1	0	0	0	0	0	0	0	0	0	0	0	0	0	0	0	0	0	0	0	0	0	0	0	0	0	0	0	0	0	0	0	0	0	0	0	0	0	0	0	0	0	0	0	0	0	0
SPAC12B10.05.1:exon:9-SPAC12B10.05.1:exon:12	SPAC12B10.05.1:exon:10;SPAC12B10.05.1:exon:11	330	2	0	0	0	0	0	0	0	0	0	0	0	0	0	0	0	0	0	0	0	0	0	0	0	0	0	0	0	0	0	0	0	0	0	0	0	0	0	0	0	0	0	0	0	0	0	0
SPAC144.05.1:exon:1-SPAC144.05.1:exon:4	SPAC144.05.1:exon:2;SPAC144.05.1:exon:3	466	2	0	0	0	0	0	0	0	0	0	0	0	0	0	0	0	0	0	0	0	0	0	0	0	0	0	0	0	0	0	0	0	0	0	0	0	0	0	0	0	0	0	0	0	0	0	0
SPAC1834.07.1:exon:3-SPAC1834.07.1:exon:5	SPAC1834.07.1:exon:4	154	1	0	0	0	0	0	0	0	0	0	0	0	0	0	0	0	0	0	0	0	0	0	0	0	0	0	0	0	0	0	0	0	0	0	0	0	0	0	0	0	0	0	0	0	0	0	0
SPAC3G6.05.1:exon:2-SPAC3G6.05.1:exon:4	SPAC3G6.05.1:exon:3	98	1	0	0	0	0	0	0	0	0	0	0	0	0	0	0	0	0	0	0	0	0	0	0	0	0	0	0	0	0	0	0	0	0	0	0	0	0	0	0	0	0	0	0	0	0	0	0
SPBC1773.01.1:exon:1-SPBC1773.01.1:exon:3	SPBC1773.01.1:exon:2	227	1	0	0	0	0	0	0	0	0	0	0	0	0	0	0	0	0	0	0	0	0	0	0	0	0	0	0	0	0	0	0	0	0	0	0	0	0	0	0	0	0	0	0	0	0	0	0
SPBC577.02.1:exon:1-SPBC577.02.1:exon:3	SPBC577.02.1:exon:2	187	1	0	0	0	0	0	0	0	0	0	0	0	0	0	0	0	0	0	0	0	0	0	0	0	0	0	0	0	0	0	0	0	0	0	0	0	0	0	0	0	0	0	0	0	0	0	0
SPBC577.06c.1:exon:4-SPBC577.06c.1:exon:2	SPBC577.06c.1:exon:3	806	1	0	0	0	0	0	0	0	0	0	0	0	0	0	0	0	0	0	0	0	0	0	0	0	0	0	0	0	0	0	0	0	0	0	0	0	0	0	0	0	0	0	0	0	0	0	0
SPBC36.05c.1:exon:12-SPBC36.05c.1:exon:7	SPBC36.05c.1:exon:11;SPBC36.05c.1:exon:10;SPBC36.05c.1:exon:9;SPBC36.05c.1:exon:8	239	4	0	0	0	0	0	0	0	0	0	0	0	0	0	0	0	0	0	0	0	0	0	0	0	0	0	0	0	0	0	0	0	0	0	0	0	0	0	0	0	0	0	0	0	0	0	0
SPBC646.15c.1:exon:3-SPBC646.15c.1:exon:1	SPBC646.15c.1:exon:2	113	1	0	0	0	0	0	0	0	0	0	0	0	0	0	0	0	0	0	0	0	0	0	0	0	0	0	0	0	0	0	0	0	0	0	0	0	0	0	0	0	0	0	0	0	0	0	0
SPBC725.12.1:exon:1-SPBC725.12.1:exon:3	SPBC725.12.1:exon:2	169	1	0	0	0	0	0	0	0	0	0	0	0	0	0	0	0	0	0	0	0	0	0	0	0	0	0	0	0	0	0	0	0	0	0	0	0	0	0	0	0	0	0	0	0	0	0	0
SPBC8D2.13.1:exon:2-SPBC8D2.13.1:exon:5	SPBC8D2.13.1:exon:3;SPBC8D2.13.1:exon:4	1065	2	0	0	0	0	0	0	0	0	0	0	0	0	0	0	0	0	0	0	0	0	0	0	0	0	0	0	0	0	0	0	0	0	0	0	0	0	0	0	0	0	0	0	0	0	0	0
SPBC11B10.02c.1:exon:4-SPBC11B10.02c.1:exon:2	SPBC11B10.02c.1:exon:3	12	1	0	0	0	0	0	0	0	0	0	0	0	0	0	0	0	0	0	0	0	0	0	0	0	0	0	0	0	0	0	0	0	0	0	0	0	0	0	0	0	0	0	0	0	0	0	0
SPBC19C2.14.1:exon:1-SPBC19C2.14.1:exon:4	SPBC19C2.14.1:exon:2;SPBC19C2.14.1:exon:3	190	2	0	0	0	0	0	0	0	0	0	0	0	0	0	0	0	0	0	0	0	0	0	0	0	0	0	0	0	0	0	0	0	0	0	0	0	0	0	0	0	0	0	0	0	0	0	0
SPBC18H10.10c.1:exon:3-SPBC18H10.10c.1:exon:1	SPBC18H10.10c.1:exon:2	249	1	0	0	0	0	0	0	0	0	0	0	0	0	0	0	0	0	0	0	0	0	0	0	0	0	0	0	0	0	0	0	0	0	0	0	0	0	0	0	0	0	0	0	0	0	0	0
SPBP16F5.07.1:exon:2-SPBP16F5.07.1:exon:4	SPBP16F5.07.1:exon:3	648	1	0	0	0	0	0	0	0	0	0	0	0	0	0	0	0	0	0	0	0	0	0	0	0	0	0	0	0	0	0	0	0	0	0	0	0	0	0	0	0	0	0	0	0	0	0	0
SPBC29A3.14c.1:exon:15-SPBC29A3.14c.1:exon:11	SPBC29A3.14c.1:exon:14;SPBC29A3.14c.1:exon:13;SPBC29A3.14c.1:exon:12	775	3	0	0	0	0	0	0	0	0	0	0	0	0	0	0	0	0	0	0	0	0	0	0	0	0	0	0	0	0	0	0	0	0	0	0	0	0	0	0	0	0	0	0	0	0	0	0
SPBC29A3.14c.1:exon:15-SPBC29A3.14c.1:exon:8	SPBC29A3.14c.1:exon:14;SPBC29A3.14c.1:exon:13;SPBC29A3.14c.1:exon:12;SPBC29A3.14c.1:exon:11;SPBC29A3.14c.1:exon:10;SPBC29A3.14c.1:exon:9	1233	6	0	0	0	0	0	0	0	0	0	0	0	0	0	0	0	0	0	0	0	0	0	0	0	0	0	0	0	0	0	0	0	0	0	0	0	0	0	0	0	0	0	0	0	0	0	0
SPBC29A3.14c.1:exon:15-SPBC29A3.14c.1:exon:6	SPBC29A3.14c.1:exon:14;SPBC29A3.14c.1:exon:13;SPBC29A3.14c.1:exon:12;SPBC29A3.14c.1:exon:11;SPBC29A3.14c.1:exon:10;SPBC29A3.14c.1:exon:9;SPBC29A3.14c.1:exon:8;SPBC29A3.14c.1:exon:7	1588	8	0	0	0	0	0	0	0	0	0	0	0	0	0	0	0	0	0	0	0	0	0	0	0	0	0	0	0	0	0	0	0	0	0	0	0	0	0	0	0	0	0	0	0	0	0	0
SPBC29A3.14c.1:exon:15-SPBC29A3.14c.1:exon:5	SPBC29A3.14c.1:exon:14;SPBC29A3.14c.1:exon:13;SPBC29A3.14c.1:exon:12;SPBC29A3.14c.1:exon:11;SPBC29A3.14c.1:exon:10;SPBC29A3.14c.1:exon:9;SPBC29A3.14c.1:exon:8;SPBC29A3.14c.1:exon:7;SPBC29A3.14c.1:exon:6	1737	9	0	0	0	0	0	0	0	0	0	0	0	0	0	0	0	2	0	0	0	0	0	0	0	0	0	0	0	0	0	0	0	0	0	0	0	0	0	0	0	0	0	0	0	0	0	0
SPBC29A3.14c.1:exon:9-SPBC29A3.14c.1:exon:3	SPBC29A3.14c.1:exon:8;SPBC29A3.14c.1:exon:7;SPBC29A3.14c.1:exon:6;SPBC29A3.14c.1:exon:5;SPBC29A3.14c.1:exon:4	968	5	0	0	0	0	0	0	0	0	0	0	0	0	0	0	0	0	0	0	0	0	0	0	0	0	0	0	0	0	0	0	0	0	0	0	0	0	0	0	0	0	0	0	0	0	0	0
SPBC29A3.14c.1:exon:6-SPBC29A3.14c.1:exon:3	SPBC29A3.14c.1:exon:5;SPBC29A3.14c.1:exon:4	464	2	0	0	0	0	0	0	0	0	0	0	0	0	0	0	0	0	0	0	0	0	0	0	0	0	0	0	0	0	0	0	0	0	0	0	0	0	0	0	0	0	0	0	0	0	0	0
SPBC15C4.01c.1:exon:3-SPBC15C4.01c.1:exon:1	SPBC15C4.01c.1:exon:2	199	1	0	0	0	0	0	0	0	0	0	0	0	0	0	0	0	0	0	0	0	0	0	0	0	0	0	0	0	0	0	0	0	0	0	0	0	0	0	0	0	0	0	0	0	0	0	0
SPBC16H5.05c.1:five_prime_UTR:1-SPBC16H5.05c.1:exon:3	SPBC16H5.05c.1:exon:1;SPBC16H5.05c.1:exon:2	82	2	0	0	0	0	0	0	0	0	0	0	0	0	0	0	0	0	0	0	0	0	0	0	0	0	0	0	0	0	0	0	0	0	0	0	0	0	0	0	0	0	0	0	0	0	0	0
SPBC12D12.08c.1:exon:4-SPBC12D12.08c.1:exon:2	SPBC12D12.08c.1:exon:3	18	1	0	0	0	0	0	0	0	0	0	0	0	0	0	0	0	0	0	0	0	0	0	0	0	0	0	0	0	0	0	0	0	0	0	0	0	0	0	0	0	0	0	0	0	0	0	0
SPBC685.02.1:exon:1-SPBC685.02.1:exon:4	SPBC685.02.1:exon:2;SPBC685.02.1:exon:3	842	2	0	0	0	0	0	0	0	0	0	0	0	0	0	0	0	0	0	0	0	0	0	0	0	0	0	0	0	0	0	0	0	0	0	0	0	0	0	0	0	0	0	0	0	0	0	0
SPBP19A11.07c.1:exon:4-SPBP19A11.07c.1:exon:2	SPBP19A11.07c.1:exon:3	220	1	0	0	0	0	0	0	0	0	0	0	0	0	0	0	0	0	0	0	0	0	0	0	0	0	0	0	0	0	0	0	0	0	0	0	0	0	0	0	0	0	0	0	0	0	0	0
SPBC2D10.12.1:exon:2-SPBC2D10.12.1:exon:5	SPBC2D10.12.1:exon:3;SPBC2D10.12.1:exon:4	911	2	0	0	0	0	0	0	0	0	0	0	0	0	0	0	0	0	0	0	0	0	0	0	0	0	0	0	0	0	0	0	0	0	0	0	0	0	0	0	0	0	0	0	0	0	0	0
SPBC1778.10c.1:exon:4-SPBC1778.10c.1:exon:1	SPBC1778.10c.1:exon:3;SPBC1778.10c.1:exon:2	281	2	0	0	0	0	0	0	0	0	0	0	0	0	0	0	0	0	0	0	0	0	0	0	0	0	0	0	0	0	0	0	0	0	0	0	0	0	0	0	0	0	0	0	0	0	0	0
[truncated: 576 more rows]
[truncated: 70 more columns]

## Sheet: S3
Supplemental Table S3. Exon-skipping events identified by Awan et al, 2013 and in this study.
Note that columns A,C-F of this table were published in Table S6 in Awan et al. 2013, with additional columns added here.
Some exons on reverse strand were renumbered to match the spliced region length according to Awan et al. 2013.
Awan et al, 2013	Bitton et al	Awan et al, 2013	Awan et al, 2013	Awan et al, 2013	Awan et al, 2013	Gene_Names	This study	This study	This study
skiped exon	Exons accession rematched	peak read count	length of exon plus flanking introns (nt)	Diagnostic lariat reads	Diagnostic junction reads		Detected	Diagnostic junction reads	High confidence set
SPBC428.01c.1 exon 2	SPBC428.01c.1:exon:6	851	164	0	0	nup107	Yes	97	Yes
SPAC22F3.05c.1 exon 3	SPAC22F3.05c.1:exon:3	663	165	2	0	alp41	Yes	1532	Yes
SPBC11C11.01.1 exon 2	SPBC11C11.01.1:exon:2	349	156	1	0	sr140	Yes	80	No
SPBP4H10.08.1 exon 2	SPBP4H10.08.1:exon:2	314	165	0	0	qcr10	Yes	44	Yes
SPBC1709.02c.1 exon 2	SPBC1709.02c.1:exon:3	311	151	0	0	vrs1	Yes	299	Yes
SPAC22F3.05c.1 exon 5	SPAC22F3.05c.1:exon:5	309	161	1	2	alp41	Yes	49	No
SPCC794.07.1 exon 2	SPCC794.07.1:exon:2	307	208	0	0	lat1	No	0	No
SPBC1105.09.1 exon 3	SPBC1105.09.1:exon:3	158	184	0	0	ubc15	Yes	61	No
SPAC27D7.08c.1 exon 6	SPAC27D7.08c.1:exon:2	154	193	0	3	mettl16	Yes	445	No
SPAC1002.07c.1 exon 3	SPAC1002.07c.1:exon:4	139	139	2	0	ats1	Yes	179	No
SPBC1711.03.1 exon 2	SPBC1711.03.1:exon:2	120	214	0	0	aim27	Yes	1090	Yes
SPAC20G4.04c.1 exon 3	SPAC20G4.04c.1:exon:3	107	132	3	0	hus1	Yes	10	No
SPBC17D11.01.1 exon 2	SPBC17D11.01.1:exon:2	94	209	0	0	nep1	Yes	54	No
SPCC825.05c.1 exon 2	SPCC825.05c.1:exon:3	89	202	0	2	srrm1	Yes	237	Yes
SPCC1183.05c.1 exon 4	SPCC1183.05c.1:exon:9	85	205	0	0	lig4	Yes	211	Yes
SPBC2D10.15c.1 exon 3	SPBC2D10.15c.1:exon:2	83	121	1	1	pth1	Yes	58	No
SPAC23C4.17.1 exon 2	SPAC23C4.17.1:exon:2	78	207	0	1	trm402	Yes	24	No
SPBC3E7.07c.1 exon 3	SPBC3E7.07c.1:exon:4	76	132	1	0	duf757	Yes	30	No
SPCC126.11c.1 exon 2	SPCC126.11c.1:exon:2	73	167	0	5		Yes	143	No
SPBC4C3.10c.1 exon 2	SPBC4C3.10c.1:exon:2	73	178	0	0	pre3	Yes	269	Yes
SPCC1840.04.1 exon 2	SPCC1840.04.1:exon:2	63	147	1	0	pca1	Yes	24	No
SPBC342.04.1 exon 2	SPBC342.04.1:exon:2	63	188	0	2	rpn1301	Yes	3	No
SPAC16.01.1 exon 2	SPAC16.01.1:exon:2	61	279	0	0	rho2	No	0	No

## Sheet: S4
Supplemental Table S4. Local exon-skipping ratios. Total number of diagnostic skipping reads was divided by total junction reads at a given locus (i.e. exon-skipping plus their corresponding normal junction reads).
NA: no exon-skipping and normal junction reads were identified in a given sample; local ESR was set to 0.
Flanking exons	Skipped exon/s id	Skipped exon/s length	Numnber of exon/s skipped	BothSkippingAndCanonicalFlag	Veg.growth_sample_12	Veg.growth_sample_13	Veg.growth_sample_17	Veg.growth_sample_19	Veg.growth_sample_20	Veg.growth_sample_21	Veg.growth_sample_22	Veg.growth_sample_27	Veg.growth_sample_69	Veg.growth_sample_72	Veg.growth_sample_73	Veg.growth_sample_127	Veg.growth_sample_136	Veg.growth_sample_137	Veg.growth_sample_144	Veg.growth_sample_145	Veg.growth_sample_177	Veg.growth_sample_194	Veg.growth_sample_193	spt6_sample_9	spt6_sample_10	spt6_sample_34	rpb4_sample_16	Y1F_sample_195	Y1F_sample_196	S2A_sample_197	S2A_sample_198	T4A_sample_199	T4A_sample_200	S7A_sample_201	S7A_sample_202	Y1F_S7A_sample_203	Y1F_S7A_sample_204	S2A_S7A_sample_205	S2A_S7A_sample_206	T4A_S7A_sample_207	T4A_S7A_sample_208	mtr4_sample_80	mtr4_sample_81	cid14_sample_191	cid14_sample_192	Stationary_sample_30	Stationary_sample_31	Stationary_sample_71	Stationary_sample_182
SPAC806.04c.1:exon:4-SPAC806.04c.1:exon:1	SPAC806.04c.1:exon:3;SPAC806.04c.1:exon:2	1180	2	YES	0	0	0	0	0	0	0	0	0	0	0	0	0	0	0	0	0.00406504	0	0	0.00806452	0	0	0	0	0	0	0	0	0	0	0	0	0	0	0	0	0	0	0	0	0	0	0	0	0.00434783
SPAC1F5.10.1:exon:3-SPAC1F5.10.1:exon:1	SPAC1F5.10.1:exon:2	21	1	YES	0	0.105263	0.0434783	0	NA	0	0	0	0.035461	0	0.0172414	0.037037	0	0.0247934	0	0.00869565	0.0224719	0	0	0	0.25	0	0	0.125	0.047619	0.571429	0.0952381	0.0833333	0.05	0	0	0.230769	0.1	0.125	0.0454545	0.0833333	0	0	0.0196078	0.0106383	0.021978	0	0	0.0625	0.047619
SPAC18B11.07c.1:exon:1-SPAC18B11.07c.1:exon:3	SPAC18B11.07c.1:exon:2	65	1	YES	0	0.0108696	0	0	0	0	0	0	0	0	0	0	0	0	0	0	0	0	0	0	0	0	0.00534759	0	0	0	0	0	0	0	0	0	0	0	0	0	0	0	0	0.00546448	0.00510204	0	0	0.000855432	0
SPAC18B11.07c.1:exon:2-SPAC18B11.07c.1:exon:5	SPAC18B11.07c.1:exon:3;SPAC18B11.07c.1:exon:4	225	2	YES	0	0	0	0	0	0	0	0	0	0	0	0	0	0	0	0	0	0	0	0	0	0	0	0	0	0	0	0	0	0	0	0	0	0	0	0	0	0	0	0	0	0	0	0	0
SPAC18B11.07c.1:exon:3-SPAC18B11.07c.1:exon:5	SPAC18B11.07c.1:exon:4	104	1	YES	0	0	0	0	0	0	0	0	0	0	0	0.00537634	0	0	0	0	0	0.002457	0	0	0.00471698	0	0	0	0.00217391	0	0	0	0	0	0	0	0	0	0	0	0	0	0.00404858	0	0	0	0	0	0
SPAC1751.02c.1:exon:3-SPAC1751.02c.1:exon:1	SPAC1751.02c.1:exon:2	106	1	YES	0	0	0.0136986	0	0	0	0	0	0	0	0	0.0103093	0.011236	0.0180723	0	0.00757576	0.00757576	0.0769231	0.0325203	0	0	0.1	0	0.0165746	0.0731707	0.0176991	0.0545455	0.00625	0.0582524	0	0	0	0.0181818	0.00478469	0	0	0	0.0144928	0.016129	0.00847458	0.0107527	0	0	0.000883392	0
SPAC1751.03.1:exon:1-SPAC1751.03.1:exon:3	SPAC1751.03.1:exon:2	157	1	YES	0	0	0	0	0	0	0	0	0	0	0	0	0	0	0	0	0.00124224	0	0	0	0	0.004329	0	0	0	0.0103627	0	0	0	0	0	0	0	0	0	0.00480769	0	0	0	0.00383632	0.00122399	0	0	0	0
SPAC227.10.1:exon:2-SPAC227.10.1:exon:4	SPAC227.10.1:exon:3	124	1	YES	0	0	0	0	0	0	0	0	0	0.00446429	0.00411523	0	0.0106383	0.00378788	0.00769231	0	0	0	0	0	0	0	0	0.0225564	0	0	0	0	0	0	0	0	0.00990099	0	0	0	0	0	0	0	0	0	0	0	0.00526316
SPAC13A11.04c.1:exon:4-SPAC13A11.04c.1:exon:2	SPAC13A11.04c.1:exon:3	298	1	YES	0	0	0	0	NA	0	0	0	0	0	0	0.0555556	0	0	0	0	0	0	0	0	0.25	0	0	0	0	0	0	0	0	0	0	0	0	0	0	0	0	0	0	0	0	0	0	0	0
SPAC1D4.02c.1:exon:4-SPAC1D4.02c.1:exon:2	SPAC1D4.02c.1:exon:3	121	1	YES	0	0	0	NA	NA	0	0	0	0	0	0.125	0	0	0	0.5	0.125	0	0	0	NA	NA	0	0	0	0	0	0	0	0	0	0	0	0	0.129032	0	0	0	0	0.111111	0	0	0	0	0	0
SPAC1D4.02c.1:exon:3-SPAC1D4.02c.1:exon:1	SPAC1D4.02c.1:exon:2	188	1	YES	0	0	0	NA	0	0	NA	0	0	0	0	0	0	0	0	0	0	0	0	0	0	0	0	0	0	0	0	0	0	0	0	0	0	0	0	0	0	0	0	0	0	0	0	0	0
SPAC22F3.05c.1:exon:2-SPAC22F3.05c.1:exon:4	SPAC22F3.05c.1:exon:3	73	1	YES	0.342105	0.351852	0.210526	0.222222	0.166667	0.625	0.428571	0.2	0.375	0.222222	0.197674	0.150943	0.111111	0.173913	0.3	0.189189	0.214286	0	0	0.166667	0.428571	0	0	0	0.157895	0.0769231	0.333333	0	0.1875	0.136364	0.0625	0	0	0	0	0	0	0.357798	0.418605	0.243243	0.333333	0.0555556	0.0166667	0	0.0914286
SPAC22F3.03c.1:exon:8-SPAC22F3.03c.1:exon:11	SPAC22F3.03c.1:exon:9;SPAC22F3.03c.1:exon:10	257	2	YES	0	0	0	NA	NA	NA	0	0	0	0	0	0	0	0	0	0	0	NA	NA	0	0	0	0	0	0	0	0	0	0	0	0	0	0	0	NA	0	0	0	0	0	0	0	0	NA	0
SPAC22F3.03c.1:exon:12-SPAC22F3.03c.1:exon:14	SPAC22F3.03c.1:exon:13	70	1	YES	0	0	0	NA	NA	NA	NA	0	0	0.111111	0.125	0	0.117647	0.0689655	NA	0	0	0	0	0	0	0	0	0	0	0	0	0	0	0	0.1	0	0	0.133333	0	0	0	0	0	0	0	0	0	0	0
SPAC22G7.04.1:exon:1-SPAC22G7.04.1:exon:4	SPAC22G7.04.1:exon:2;SPAC22G7.04.1:exon:3	266	2	YES	0	0	0	0	0	0	0	0	0	0	0	0	0	0	0	0	0	0	0	0	0	0	0	0	0	0	0	0	0	0	0	0	0	0	0	0	0	0	0	0.0106383	0	0	0	0	0
SPAC22G7.09c.1:exon:4-SPAC22G7.09c.1:exon:2	SPAC22G7.09c.1:exon:3	109	1	YES	0	0	0	0	0	0	0	0	0	0	0	0	0	0.00823045	0	0	0	0	0	0	0	0	0	0	0	0	0	0	0	0	0	0	0	0	0	0	0.00813008	0	0	0	0.00534759	0	0	0	0
SPAC16C9.04c.1:exon:3-SPAC16C9.04c.1:exon:1	SPAC16C9.04c.1:exon:2	180	1	YES	0	0	0	0	0	0	0	0	0	0	0	0	0	0	0	0	0	0	0	0	0	0	0	0	0	0	0	0	0	0	0	0	0	0	0	0	0	0	0	0.00925926	0.00877193	0	0	0	0
SPAC1687.03c.1:exon:3-SPAC1687.03c.1:exon:1	SPAC1687.03c.1:exon:2	112	1	YES	0	0.0277778	0.00666667	0	0	0	0	0	0	0.0215054	0.00555556	0.0272727	0.00446429	0.00515464	0	0.00813008	0.0254777	0.019802	0.00925926	0	0.0222222	0	0.0298507	0.00909091	0	0	0	0.0078125	0.00847458	0.036036	0	0	0	0.00769231	0	0.0182927	0	0.040404	0.0426829	0.0671141	0.0273438	0	0	0	0
SPAC1687.21.1:exon:1-SPAC1687.21.1:exon:3	SPAC1687.21.1:exon:2	123	1	YES	0	0	0	0	0	0	0	0	0	0	0	0	0	0	0	0	0	0	0	0	0	0	0	0	0	0	0	0	0	0	0	0	0	0	0	0	0	0	0.00465116	0	0	0	0	0	0
SPAC1687.21.1:exon:1-SPAC1687.21.1:exon:5	SPAC1687.21.1:exon:2;SPAC1687.21.1:exon:3;SPAC1687.21.1:exon:4	211	3	YES	0	0	0.00292398	0	0	0	0	0	0	0.00166389	0	0	0	0	0	0.00178891	0	0	0	0	0	0	0	0	0	0	0	0	0	0	0	0	0	0	0	0	0	0	0.00465116	0	0	0	0	0	0
SPAC1687.21.1:exon:3-SPAC1687.21.1:exon:5	SPAC1687.21.1:exon:4	22	1	YES	0.0196078	0	0	0	0.125	0	0	0.0357143	0.0138889	0.0149254	0.00540541	0.00840336	0	0.00757576	0	0	0.00534759	0	0	0	0	0.0208333	0	0	0	0.00943396	0.0188679	0	0.0243902	0	0	0	0.0454545	0	0	0	0	0.0326087	0.047619	0.00884956	0.00840336	0.0243902	0.0571429	0	0
SPAC222.15.1:exon:2-SPAC222.15.1:exon:4	SPAC222.15.1:exon:3	102	1	YES	0	0	0	NA	NA	0	NA	NA	NA	0	0	0	0	0	0	0	0	0	NA	0	0	NA	0	NA	NA	0	NA	0	NA	0	0	0	0	0	0	0	NA	0	0	0	0	0	0	0	0
SPAC222.16c.1:exon:6-SPAC222.16c.1:exon:3	SPAC222.16c.1:exon:5;SPAC222.16c.1:exon:4	246	2	YES	0	0	0	NA	0	0	0	0	0	0	0	0	0	0	0	0	0	0	0	0	0	0	0	0	0	0	0	0	0	0	0	0	0	0	0	0	0	0	0	0	0	0	0	0	0
SPAC222.16c.1:exon:4-SPAC222.16c.1:exon:1	SPAC222.16c.1:exon:3;SPAC222.16c.1:exon:2	237	2	YES	0	0	0	0	0	0	0	0	0	0	0	0	0	0	0	0	0	0	0	0.0526316	0	0	0	0	0	0	0	0	0	0	0	0	0	0	0	0	0	0	0	0	0	0	0	0	0
SPAC139.06.1:exon:1-SPAC139.06.1:exon:3	SPAC139.06.1:exon:2	104	1	YES	0	0	0	NA	NA	0	0	0	0	0	0	0	0	0	0	0	0.0147059	0	0	0	0.111111	0	0	0	0	0	0	0	0	0	0	0	0	0	0	0	0	0	0	0	0	0	0	0	0
SPAC30D11.13.1:exon:3-SPAC30D11.13.1:exon:1	SPAC30D11.13.1:exon:2	80	1	YES	0	0	0	0	NA	0	0	0	0	0	0	0	0	0	0	0	0	0	0	0	0	0	0	0	0	0	0.025641	0	0	0	0	0	0	0	0	0	0	0	0	0	0	0	0	0	0
SPAC30D11.12.1:exon:3-SPAC30D11.12.1:exon:1	SPAC30D11.12.1:exon:2	187	1	YES	0.00109649	0	0	0	0	0	0	0	0	0	0	0	0	0	0	0	0	0	0	0	0	0	0	0	0	0	0	0	0	0	0	0	0	0	0	0	0	0	0	0	0	0	0	0	0
SPAC56F8.05c.1:exon:5-SPAC56F8.05c.1:exon:3	SPAC56F8.05c.1:exon:4	48	1	YES	0	0	0	0	0	0	0	0	0	0	0	0.00431034	0.00151515	0	0	0	0	0	0	0	0	0	0	0	0	0	0	0.00235294	0	0	0	0	0	0	0	0	0	0	0	0	0	0	0	0	0
SPAC22A12.08c.1:exon:4-SPAC22A12.08c.1:exon:2	SPAC22A12.08c.1:exon:3	495	1	YES	0	0	0	0	0	0	0	0	0	0	0	0.0136986	0	0	0	0	0	0	0	0	0	0	0	0	0.05	0	0	0	0.0277778	0	0.025641	0	0	0	0	0	0	0	0	0	0	0	0	0	0
SPAC22A12.09c.1:exon:4-SPAC22A12.09c.1:exon:2	SPAC22A12.09c.1:exon:3	317	1	YES	0	0	0	0	0	NA	NA	0	0	0	0	0	0	0	NA	0	0	0	0	0	0	0	0	0	0	0	0	0	0	0	0	0	0	0	0	0	0	0	0	0	0	0	0	0	0
SPAC6F12.07.1:exon:1-SPAC6F12.07.1:exon:3	SPAC6F12.07.1:exon:2	60	1	YES	0	0	0	0	0	0	0	0	0	0	0	0	0	0	0	0	0	0	0	0	0	0	0	0	0	0	0	0	0	0	0	0	0	0	0	0	0	0	0	0	0	0	0	0	0
SPAC6F12.07.1:exon:2-SPAC6F12.07.1:exon:4	SPAC6F12.07.1:exon:3	186	1	YES	0.00925926	0.0229008	0.0176471	0	0	0	0	0.0689655	0.00178253	0.0190217	0.0153846	0	0.00298954	0.00560224	0.00617284	0.0105634	0.0136612	0	0	0	0	0	0	0	0	0	0	0.019802	0	0	0	0.0367647	0	0	0.02	0.0233918	0	0.0162602	0.0101351	0.0305164	0.0229885	0	0	0	0
SPAC5D6.05.1:exon:4-SPAC5D6.05.1:exon:1	SPAC5D6.05.1:exon:3;SPAC5D6.05.1:exon:2	229	2	YES	0	0	0	0	0	0	0	0	0	0	0	0	0	0	0	0	0	0	0	0	0	0	0	0	0	0	0	0	0	0	0	0	0	0	0	0	0	0	0	0	0	0	0	0	0
SPAC167.07c.1:exon:1-SPAC167.07c.1:exon:3	SPAC167.07c.1:exon:2	57	1	YES	0.111111	0	0	NA	NA	NA	0	0	0	0	0	0.047619	0	0	NA	0	0	0	0.0243902	0	0	0	0	0.0689655	0.0869565	0.0377358	0	0	0.125	0	0	0	0	0	0	0	0	0	0	0	0	0	0	0	0
SPAC167.02.1:exon:3-SPAC167.02.1:exon:1	SPAC167.02.1:exon:2	134	1	YES	0	0	0	NA	NA	NA	NA	0	0	0	0	0	0	0	0	0	0.0625	0	0.0833333	0	NA	0	0	0	0.166667	0	0	0	0	0	0	0	0	0	0	0	0	0	0	0	0	0	0.125	0	0
SPAC23H4.04.1:exon:3-SPAC23H4.04.1:exon:1	SPAC23H4.04.1:exon:2	62	1	YES	0.0909091	0.025	0.0465116	0	NA	0	0	0.0769231	0	0.031746	0.0322581	0.0526316	0.0131579	0.0204082	0	0.02	0.0348837	0.015873	0	0.166667	0	0	0	0	0	0	0	0	0	0	0.0227273	0	0	0	0	0	0	0	0.0192308	0.0138889	0.012987	0.142857	0	0	0.025641
SPAP27G11.12.1:exon:2-SPAP27G11.12.1:exon:4	SPAP27G11.12.1:exon:3	33	1	YES	0	0	0	0	0	0	0	NA	0	0	0	0	0	0	0	0.0140845	0	0	0	0	0	NA	0	0	0	0	0	0	0	0	0	0	0	0	0	0	0	0	0.015873	0.00645161	0	NA	NA	0	0.00735294
SPAC343.14c.1:exon:3-SPAC343.14c.1:exon:1	SPAC343.14c.1:exon:2	391	1	YES	0	0	0.0204082	0.5	0	0	1	0	0	0.0135747	0	0	0	0	0	0	0	0	0	0	0	0	0.0188679	0	0	0	0	0	0	0	0	0	0	0	0	0	0	0.0310078	0.0116279	0.00390625	0.00350877	0	0	0	0
SPAC824.05.1:exon:2-SPAC824.05.1:exon:5	SPAC824.05.1:exon:3;SPAC824.05.1:exon:4	192	2	YES	0	0	0	NA	NA	0	NA	NA	0	0	0	0	0	0	0	0	0	0	0	0	0	NA	0	0	0	0	0	0	0	0	0	0	0	0	NA	0	0	0	0	0	0	0	0	0	0
SPAC824.09c.1:exon:5-SPAC824.09c.1:exon:3	SPAC824.09c.1:exon:4	44	1	YES	0	0	0	0	0	0.166667	0	0	0	0.00714286	0	0	0	0	0	0	0	0.00909091	0.008	0	0	0	0	0	0.0104167	0	0.00510204	0	0	0	0.00961538	0.0181818	0	0	0.02	0.00613497	0	0	0.0153846	0.0103093	0.017094	0	0	0	0
SPAC824.09c.1:exon:5-SPAC824.09c.1:exon:2	SPAC824.09c.1:exon:4;SPAC824.09c.1:exon:3	123	2	YES	0	0.0175439	0	0	0	0	0	0	0	0.00714286	0	0	0	0.0049505	0	0	0	0	0	0	0	0	0	0	0.0052356	0.00900901	0	0	0	0	0	0	0	0	0	0	0	0	0.0153846	0	0	0	0	0	0
SPAC664.08c.1:exon:4-SPAC664.08c.1:exon:2	SPAC664.08c.1:exon:3	48	1	YES	0	0	0	NA	NA	0	0	0	0	0	0	0	0	0	0	0	0	0	0	NA	0	NA	0	0.00502513	0.0243902	0	0	0	0.0135135	0	0	0	0.0108696	0	0	0.0164835	0	0	0.111111	0	0	NA	0	0	0.2
SPACUNK12.02c.1:exon:4-SPACUNK12.02c.1:exon:2	SPACUNK12.02c.1:exon:3	91	1	YES	0	0	0	0	0	0	0	0	0	0	0	0	0	0	0	0	0	0	0	0	0	0	0	0	0	0	0	0	0	0	0	0	0	0	0	0	0	0	0	0	0	0	0	0	0
SPAC1002.07c.1:exon:6-SPAC1002.07c.1:exon:2	SPAC1002.07c.1:exon:5;SPAC1002.07c.1:exon:4;SPAC1002.07c.1:exon:3	185	3	YES	0	0	0.0384615	0	0	0	0	0	0	0.0327869	0.0434783	0	0	0	0	0.028169	0.0277778	0.00934579	0	0	0	0	0.0277778	0	0	0	0	0	0.0136054	0	0	0.00803213	0	0	0	0	0	0	0.181818	0	0.0153846	0	0	0	0
SPAC1002.07c.1:exon:6-SPAC1002.07c.1:exon:1	SPAC1002.07c.1:exon:5;SPAC1002.07c.1:exon:4;SPAC1002.07c.1:exon:3;SPAC1002.07c.1:exon:2	296	4	YES	0	0	0	0	0	0	0	0	0.00452489	0.0166667	0.0222222	0	0	0	0.0540541	0	0	0.00934579	0	0	0	0.0434783	0	0	0	0.00518135	0.00862069	0	0.00684932	0	0	0	0	0.00613497	0	0	0.017094	0	0	0	0.030303	0	0	0	0
SPAC1002.07c.1:exon:5-SPAC1002.07c.1:exon:3	SPAC1002.07c.1:exon:4	35	1	YES	0	0.0344828	0	0	0	0	NA	0.111111	0.00740741	0.0306122	0.00970874	0.00507614	0.0375	0.011236	0	0.027027	0.042735	0	0	0	0	0	0.0350877	0.025	0.0163934	0	0.0322581	0.0283019	0.0140845	0	0.0405405	0	0	0.00740741	0	0	0	0.0731707	0.08	0	0.0227273	0	0	0	0
SPAC1002.07c.1:exon:3-SPAC1002.07c.1:exon:1	SPAC1002.07c.1:exon:2	111	1	YES	0	0	0	0	0	0	0	0	0	0.00934579	0.00763359	0.0176991	0.012987	0.0149254	0	0	0	0	0	0	0	0	0	0	0	0	0.00729927	0	0	0	0.0366972	0.0186916	0.0201342	0.00934579	0	0.00775194	0.00724638	0.0196078	0.047619	0.0104167	0.0333333	0	0	0	0
SPAC9G1.05.1:exon:2-SPAC9G1.05.1:exon:4	SPAC9G1.05.1:exon:3	102	1	YES	0.0384615	0.0108696	0.0120482	0	0	0	0	0	0	0.0120482	0.00694444	0	0	0	0	0.00584795	0	0	0	0	0	0	0.037037	0	0	0	0	0	0	0	0	0	0	0	0	0	0	0	0.0104167	0.0201005	0.00613497	0	0	0	0.036036
SPAC9G1.05.1:exon:4-SPAC9G1.05.1:exon:6	SPAC9G1.05.1:exon:5	46	1	YES	0	0	0.00793651	0	0	0	0	0	0	0	0	0.00546448	0	0.0338983	0	0	0.00271739	0	0.0175439	0	0	0	0.0114943	0	0	0.111111	0.0810811	0	0	0	0	0	0	0	0	0	0	0.0206897	0.0131579	0.0227273	0.0117647	0	0	0	0.00367647
SPAC732.01.1:exon:3-SPAC732.01.1:exon:6	SPAC732.01.1:exon:4;SPAC732.01.1:exon:5	107	2	YES	0.00581395	0.00416667	0.00442478	0	0	0	0	0	0	0.00275482	0	0	0	0	0	0	0	0	0	0	0	0	0	0	0	0	0	0	0	0	0	0	0	0	0	0	0	0	0.00395257	0.00206186	0.00204082	0	0	0	0
SPAC17G8.04c.1:exon:4-SPAC17G8.04c.1:exon:1	SPAC17G8.04c.1:exon:3;SPAC17G8.04c.1:exon:2	250	2	YES	0	0	0	0	0	0	0	0	0	0	0	0	0	0	0	0	0	0	0	0	0	0	0.00284091	0	0	0	0	0	0	0	0	0	0	0	0	0	0	0	0	0.00460829	0	0	0	0	0
SPAC17G8.14c.1:exon:3-SPAC17G8.14c.1:exon:1	SPAC17G8.14c.1:exon:2	184	1	YES	0	0	0	0	0	0	0	0	0	0	0	0	0	0	0	0	0	0	0	0.00280112	0.00293255	0	0	0	0	0	0	0	0	0	0	0	0	0	0	0	0	0	0	0	0	0	0	0	0
SPAC22H10.03c.1:exon:7-SPAC22H10.03c.1:exon:2	SPAC22H10.03c.1:exon:6;SPAC22H10.03c.1:exon:5;SPAC22H10.03c.1:exon:4;SPAC22H10.03c.1:exon:3	2682	4	YES	0	0	0	NA	0	NA	0	0	0	0	0	0	0	0	0	0	0	0	0	0	0	0	0	0	0	0	0	0	0	0	0	0	0	0	0	0	0	0	0	0	0	0	0	0	0
SPAC22H10.03c.1:exon:6-SPAC22H10.03c.1:exon:4	SPAC22H10.03c.1:exon:5	170	1	YES	0	0	0	0	0	0	0	0	0	0	0	0	0	0	0	0	0.0140845	0	0	0	0	0	0	0	0	0	0	0	0	0	0	0	0	0	0	0	0	0	0	0	0	0	0	0	0
SPAC22H10.03c.1:exon:5-SPAC22H10.03c.1:exon:3	SPAC22H10.03c.1:exon:4	119	1	YES	0.0833333	0	0	NA	NA	NA	NA	0	0	0	0	0	0	0	0	0	0	0	0	0	0	0	0	0	0	0	0	0	0	0	0	0	0	0	0	0	0	0	0	0	0	0	0	0	0
SPAC25H1.10c.1:exon:3-SPAC25H1.10c.1:exon:1	SPAC25H1.10c.1:exon:2	137	1	YES	0	0	0	0	0	0	0	0	0	0	0	0	0	0	0	0	0	0	0	0	0	0	0.00392157	0	0	0	0	0	0	0	0	0	0	0	0	0	0	0	0	0.00261097	0	0	0	0	0
SPAC4A8.08c.1:exon:4-SPAC4A8.08c.1:exon:1	SPAC4A8.08c.1:exon:3;SPAC4A8.08c.1:exon:2	2100	2	YES	0	0	0	0	NA	NA	NA	0	0	0	0	0	0	0	0	0	0	0	0	NA	0	0	0	0	0	0	0	0	0	0	0	0	0	0	0	0	0	0	0	0	0	0	0	0	0
SPAC823.14.1:exon:1-SPAC823.14.1:exon:3	SPAC823.14.1:exon:2	39	1	YES	0	0.00166667	0	0	0	0	0	0	0	0.00086881	0	0.00222222	0.00406504	0	0	0.000990099	0.00094162	0	0	0	0	0	0.00222222	0.0288462	0	0	0.0238095	0	0.0634921	0	0	0.0047619	0	0.00763359	0	0	0	0	0.00123001	0.00350263	0.00264784	0	0	0.00319489	0.00326797
SPAC823.14.1:exon:2-SPAC823.14.1:exon:4	SPAC823.14.1:exon:3	73	1	YES	0	0	0	0	0	0	0	0	0	0	0	0	0	0	0	0.00348432	0	0	0	0	0	0	0	0	0	0	0	0	0	0	0	0	0	0	0	0	0	0	0	0	0	0	0	0	0
SPAC6F6.07c.1:exon:4-SPAC6F6.07c.1:exon:2	SPAC6F6.07c.1:exon:3	33	1	YES	0	0.000503398	0.000210615	0	0.00738007	0	0	0.000379363	0	0.000304507	0.000307125	0	0.000646134	0	0.000452284	0.00103235	0.000310463	0	0	0.000644192	0.00111161	0.000442282	0	0	0	0	0	0.000119775	0	0	0	0	0	0	0	0	0	0.000891795	0.000680272	0.000917712	0.000443984	0	0	0	0.000360231
SPAC6F6.07c.1:exon:4-SPAC6F6.07c.1:exon:1	SPAC6F6.07c.1:exon:3;SPAC6F6.07c.1:exon:2	80	2	YES	0	0.000251762	0.000210615	0	0	0	0	0	0	0	0	0.00137931	0	0	0	0	0	0	0.000730327	0	0.000444939	0	0	0	0	0	0	0	0	0	0	0	0.000252589	0	0	0	0	0	0	0	0.000296033	0	0	0	0
SPAC6F6.16c.1:exon:5-SPAC6F6.16c.1:exon:3	SPAC6F6.16c.1:exon:4	251	1	YES	0	0	0	0	0	NA	0	0	0	0	0	0	0	0	0	0	0	0	0	0	0.2	0	0	0	0	0	0	0	0	0	0	0	0	0	0	0	0	0	0	0	0	0	0	0	0
SPAC6F6.16c.1:exon:4-SPAC6F6.16c.1:exon:1	SPAC6F6.16c.1:exon:3;SPAC6F6.16c.1:exon:2	177	2	YES	0	0	0	0	0	0	0	0	0	0	0.0192308	0	0	0	0	0.0138889	0	0	0	0	0	0	0	0	NA	0	1	0	0	0	0	0	0	0	0	0	0	0	0	0	0	0	0	0	0
SPAC1805.05.1:exon:1-SPAC1805.05.1:exon:3	SPAC1805.05.1:exon:2	70	1	YES	0	0	0	0	0	0	0	0	0	0	0	0	0	0	0	0	0	0.005	0.01875	0	0	0	0	0	0	0.00442478	0	0	0	0	0	0	0	0	0	0	0	0	0	0.0377358	0	0	0	0.00487805	0
SPAC1805.08.1:exon:1-SPAC1805.08.1:exon:3	SPAC1805.08.1:exon:2	111	1	YES	0	0.015873	0	0	0	0	0	0	0	0	0	0	0	0	0	0	0	0	0	0	0	0	0	0	0	0	0	0	0	0	0	0	0	0	0	0	0	0	0	0.00632911	0	0	0	0	0
SPAC24C9.16c.1:exon:3-SPAC24C9.16c.1:exon:1	SPAC24C9.16c.1:exon:2	38	1	YES	0.0188679	0	0.021978	0	0	0	0	0	NA	0	0	0.02	0.00632911	0	0.176471	0	0	0	0	0	0	0	0	0	0	0	0	0	0.0454545	0	0.0322581	0	0	0	0	0	0	0.032967	0	0.0141844	0.025641	0	0	0	0
SPAC589.05c.1:exon:3-SPAC589.05c.1:exon:1	SPAC589.05c.1:exon:2	149	1	YES	0	0	0	NA	0	0	0	0	0	0	0	0	0	0	0	0	0	0	0	0.125	0	0	0	0	0	0	0	0	0	0	0	0	0	0	0	0	0	0	0	0	0	0	0	0	0
SPAC3G9.13c.1:exon:1-SPAC3G9.13c.1:exon:3	SPAC3G9.13c.1:exon:2	81	1	YES	0	0	0.166667	NA	0	0	NA	0	0	0	0	0.25	0	0	0	0	0	0	0	0.111111	0.666667	0	0	0	0	0	0	0	0	0	0.0689655	0	0	0	0	0	0	0	0	0	0.0454545	0.142857	0	0.00628931	0
SPAC3G9.12.1:exon:3-SPAC3G9.12.1:exon:1	SPAC3G9.12.1:exon:2	68	1	YES	0	0	NA	NA	NA	NA	NA	0	0	0	0	0	0	0	0	0	0	0	0	0	0	NA	NA	0	0	0	0	0	0	0	0	0	0	0	0	0	0	0	0	0	0	0	NA	0	0
SPAC3G9.17.1:exon:3-SPAC3G9.17.1:exon:1	SPAC3G9.17.1:exon:2	89	1	YES	0	0.111111	0.25	0	NA	0	NA	0	0	0.0625	0	0	0	0	0	0.125	0.222222	0	0	0	0	0	0	0	0	0	0	0	0	0	0	0	0	0	0	0	0	0.0714286	0.2	0.1875	0	0	0	0	0
SPAC26A3.14c.1:exon:3-SPAC26A3.14c.1:exon:1	SPAC26A3.14c.1:exon:2	89	1	YES	0.0121951	0.00869565	0	0	0	0	0	0	0.0120579	0	0	0.0714286	0.0123762	0	0	0	0.00591716	0.0346821	0.00294985	0	0	0.00367647	0	0	0	0.00671141	0.0295567	0	0.00408163	0.00236967	0.00346021	0.0106157	0.00469484	0.0172414	0.0964912	0.00221239	0.0207469	0	0.00680272	0	0.00404858	0	0	0.00524738	0.00446429
[truncated: 2,503 more rows]
[truncated: 71 more columns]

## Sheet: S5
Supplemental Table S5. Local exon-skipping ratios for 111 exon-skipping events (high-confidence set). Total number of diagnostic skipping reads was divided by total junction reads at a given locus (i.e. exon-skipping plus corresponding normal junction reads).
[truncated: 115 more rows]
[truncated: 73 more columns]

[truncated: 8 more sheets: S6, S7, S8, S9, S10, S11, S12, S13]
